# Supplementary material for: Generalized Hybrid One-Step Block Method Involving Fifth Derivative for Solving Fourth-Order Ordinary Differential Equation Directly
Source: Hindawi journal article supplement (doi:10.1155/2017/7637651), 2017-01-01
Supplement: f1 [file 7637651.f1.zip]

## Appendix I

$$\alpha_0 = \frac{(x_n - x + hr)(x_n - x + hs)(x_n - x + ht)}{h^3 rst}, \quad \alpha_r = \frac{(x - x_n)(x_n - x + hs)(x_n - x + ht)}{h^3 r(r-s)(r-t)},$$

$$\alpha_s = \frac{-(x - x_n)(x_n - x + hr)(x_n - x + ht)}{h^3 s(r-s)(s-t)}, \quad \alpha_t = \frac{(x - x_n)(x_n - x + hr)(x_n - x + hs)}{h^3 t(r-t)(s-t)},$$

$$\begin{aligned} \beta_0 = & (x - x_n)^4 / 24 + ((x - x_n)^7 (r^3 s^3 + r^3 t^3 + s^3 t^3 + 4rs^2 t^3 + 4rs^3 t^2 + 4r^2 st^3 + 4r^2 s^3 t + 4r^3 st^2 + \\ & 4r^3 s^2 t + 4rs^3 t^3 + 4r^3 st^3 + 4r^3 s^3 t + 8r^2 s^2 t^2 + 8r^2 s^3 t^2 + 8r^2 s^2 t^2 + 4r^2 s^3 t^3 + 4r^3 s^2 t^3 + \\ & 4r^3 s^3 t^2 + r^3 s^3 t^3)) / (420h^3 r^3 s^3 t^3) - ((x - x_n)^{10} (16r^2 s^2 + 4r^2 s^3 + 4r^3 s^2 + 16r^2 t^2 + 4r^2 t^3 + 4r^3 t^2 + \\ & 16s^2 t^2 + 4s^2 t^3 + 4s^3 t^2 + 4rs^2 + 4r^2 s + 4rs^3 + 4r^3 s + 4rt^2 + 4r^2 t + 4rt^3 + 4r^3 t + 4st^2 + 4s^2 t + \\ & 4st^3 + 4s^3 t + 36rst^2 + 36rs^2 t + 36r^2 st + 11rst^3 + 11rs^3 t + 11r^3 st + 36rs^2 t^2 + 36r^2 st^2 + 36r^2 s^2 t + \\ & 4rs^2 t^3 + 4rs^3 t^2 + 4r^2 st^3 + 4r^2 s^3 t + 4r^3 st^2 + 4r^3 s^2 t + 11rst + 16r^2 s^2 t^2)) / (5040h^6 r^3 s^3 t^3) + ((x - \\ & x_n)^{11} (4r^2 s^2 + 4r^2 t^2 + 4s^2 t^2 + rs + rt + st + 4rs^2 + 4r^2 s + rs^3 + r^3 s + 4rt^2 + 4r^2 t + rt^3 + r^3 t + \\ & 4st^2 + 4s^2 t + st^3 + s^3 t + 12rst^2 + 12rs^2 t + 12r^2 st + rst^3 + rs^3 t + r^3 st + 4rs^2 t^2 + 4r^2 st^2 + 4r^2 s^2 t + \\ & 12rst)) / (3960h^7 r^3 s^3 t^3) - (h(x - x_n)^3 (546r^3 s^7 - 884r^2 s^8 + 546r^4 s^6 + 546r^5 s^5 + 546r^6 s^4 + \\ & 546r^7 s^3 - 884r^8 s^2 + 780r^2 s^9 - 364r^3 s^8 - 364r^4 s^7 - 364r^5 s^6 - 364r^6 s^5 - 364r^7 s^4 - 364r^8 s^3 + \\ & 780r^9 s^2 - 190r^2 s^{10} + 70r^3 s^9 + 70r^4 s^8 + 70r^5 s^7 + 70r^6 s^6 + 70r^7 s^5 + 70r^8 s^4 + 70r^9 s^3 - 190r^{10} s^2 - \\ & 884r^{12} s^8 + 546r^{13} t^7 + 546r^{14} t^6 + 546r^{15} t^5 + 546r^{16} t^4 + 546r^{17} t^3 - 884r^{18} t^2 + 780r^{19} t^9 - 364r^{20} t^8 - \\ & 364r^{21} t^7 - 364r^{22} t^6 - 364r^{23} t^5 - 364r^{24} t^4 - 364r^{25} t^3 + 780r^{26} t^2 - 190r^{27} t^{10} + 70r^{28} t^9 + 70r^{29} t^8 + \\ & 70r^{30} t^7 + 70r^{31} t^6 + 70r^{32} t^5 + 70r^{33} t^4 + 70r^{34} t^3 + 70r^{35} t^2 - 190r^{36} t^{10} + 70r^{37} t^9 + 70r^{38} t^8 + \\ & 70r^{39} t^7 + 70r^{40} t^6 + 70r^{41} t^5 + 70r^{42} t^4 + 70r^{43} t^3 + 70r^{44} t^2 - 190r^{45} t^{10} + 70r^{46} t^9 + 70r^{47} t^8 + \\ & 70r^{48} t^7 + 70r^{49} t^6 + 70r^{50} t^5 + 70r^{51} t^4 + 70r^{52} t^3 + 70r^{53} t^2 - 190r^{54} t^{10} + 70r^{55} t^9 + 70r^{56} t^8 + \\ & 70r^{57} t^7 + 70r^{58} t^6 + 70r^{59} t^5 + 70r^{60} t^4 + 70r^{61} t^3 + 70r^{62} t^2 - 190r^{63} t^{10} + 70r^{64} t^9 + 70r^{65} t^8 + \\ & 70r^{66} t^7 + 70r^{67} t^6 + 70r^{68} t^5 + 70r^{69} t^4 + 70r^{70} t^3 + 70r^{71} t^2 - 190r^{72} t^{10} + 70r^{73} t^9 + 70r^{74} t^8 + \\ & 70r^{75} t^7 + 70r^{76} t^6 + 70r^{77} t^5 + 70r^{78} t^4 + 70r^{79} t^3 + 70r^{80} t^2 - 190r^{81} t^{10} + 70r^{82} t^9 + 70r^{83} t^8 + \\ & 70r^{84} t^7 + 70r^{85} t^6 + 70r^{86} t^5 + 70r^{87} t^4 + 70r^{88} t^3 + 70r^{89} t^2 - 190r^{90} t^{10} + 70r^{91} t^9 + 70r^{92} t^8 + \\ & 70r^{93} t^7 + 70r^{94} t^6 + 70r^{95} t^5 + 70r^{96} t^4 + 70r^{97} t^3 + 70r^{98} t^2 - 190r^{99} t^{10} + 70r^{100} t^9 + 70r^{101} t^8 + \\ & 70r^{102} t^7 + 70r^{103} t^6 + 70r^{104} t^5 + 70r^{105} t^4 + 70r^{106} t^3 + 70r^{107} t^2 - 190r^{108} t^{10} + 70r^{109} t^9 + 70r^{110} t^8 + \\ & 70r^{111} t^7 + 70r^{112} t^6 + 70r^{113} t^5 + 70r^{114} t^4 + 70r^{115} t^3 + 70r^{116} t^2 - 190r^{117} t^{10} + 70r^{118} t^9 + 70r^{119} t^8 + \\ & 70r^{120} t^7 + 70r^{121} t^6 + 70r^{122} t^5 + 70r^{123} t^4 + 70r^{124} t^3 + 70r^{125} t^2 - 190r^{126} t^{10} + 70r^{127} t^9 + 70r^{128} t^8 + \\ & 70r^{129} t^7 + 70r^{130} t^6 + 70r^{131} t^5 + 70r^{132} t^4 + 70r^{133} t^3 + 70r^{134} t^2 - 190r^{135} t^{10} + 70r^{136} t^9 + 70r^{137} t^8 + \\ & 70r^{138} t^7 + 70r^{139} t^6 + 70r^{140} t^5 + 70r^{141} t^4 + 70r^{142} t^3 + 70r^{143} t^2 - 190r^{144} t^{10} + 70r^{145} t^9 + 70r^{146} t^8 + \\ & 70r^{147} t^7 + 70r^{148} t^6 + 70r^{149} t^5 + 70r^{150} t^4 + 70r^{151} t^3 + 70r^{152} t^2 - 190r^{153} t^{10} + 70r^{154} t^9 + 70r^{155} t^8 + \\ & 70r^{156} t^7 + 70r^{157} t^6 + 70r^{158} t^5 + 70r^{159} t^4 + 70r^{160} t^3 + 70r^{161} t^2 - 190r^{162} t^{10} + 70r^{163} t^9 + 70r^{164} t^8 + \\ & 70r^{165} t^7 + 70r^{166} t^6 + 70r^{167} t^5 + 70r^{168} t^4 + 70r^{169} t^3 + 70r^{170} t^2 - 190r^{171} t^{10} + 70r^{172} t^9 + 70r^{173} t^8 + \\ & 70r^{174} t^7 + 70r^{175} t^6 + 70r^{176} t^5 + 70r^{177} t^4 + 70r^{178} t^3 + 70r^{179} t^2 - 190r^{180} t^{10} + 70r^{181} t^9 + 70r^{182} t^8 + \\ & 70r^{183} t^7 + 70r^{184} t^6 + 70r^{185} t^5 + 70r^{186} t^4 + 70r^{187} t^3 + 70r^{188} t^2 - 190r^{189} t^{10} + 70r^{190} t^9 + 70r^{191} t^8 + \\ & 70r^{192} t^7 + 70r^{193} t^6 + 70r^{194} t^5 + 70r^{195} t^4 + 70r^{196} t^3 + 70r^{197} t^2 - 190r^{198} t^{10} + 70r^{199} t^9 + 70r^{200} t^8 + \\ & 70r^{201} t^7 + 70r^{202} t^6 + 70r^{203} t^5 + 70r^{204} t^4 + 70r^{205} t^3 + 70r^{206} t^2 - 190r^{207} t^{10} + 70r^{208} t^9 + 70r^{209} t^8 + \\ & 70r^{210} t^7 + 70r^{211} t^6 + 70r^{212} t^5 + 70r^{213} t^4 + 70r^{214} t^3 + 70r^{215} t^2 - 190r^{216} t^{10} + 70r^{217} t^9 + 70r^{218} t^8 + \\ & 70r^{219} t^7 + 70r^{220} t^6 + 70r^{221} t^5 + 70r^{222} t^4 + 70r^{223} t^3 + 70r^{224} t^2 - 190r^{225} t^{10} + 70r^{226} t^9 + 70r^{227} t^8 + \\ & 70r^{228} t^7 + 70r^{229} t^6 + 70r^{230} t^5 + 70r^{231} t^4 + 70r^{232} t^3 + 70r^{233} t^2 - 190r^{234} t^{10} + 70r^{235} t^9 + 70r^{236} t^8 + \\ & 70r^{237} t^7 + 70r^{238} t^6 + 70r^{239} t^5 + 70r^{240} t^4 + 70r^{241} t^3 + 70r^{242} t^2 - 190r^{243} t^{10} + 70r^{244} t^9 + 70r^{245} t^8 + \\ & 70r^{246} t^7 + 70r^{247} t^6 + 70r^{248} t^5 + 70r^{249} t^4 + 70r^{250} t^3 + 70r^{251} t^2 - 190r^{252} t^{10} + 70r^{253} t^9 + 70r^{254} t^8 + \\ & 70r^{255} t^7 + 70r^{256} t^6 + 70r^{257} t^5 + 70r^{258} t^4 + 70r^{259} t^3 + 70r^{260} t^2 - 190r^{261} t^{10} + 70r^{262} t^9 + 70r^{263} t^8 + \\ & 70r^{264} t^7 + 70r^{265} t^6 + 70r^{266} t^5 + 70r^{267} t^4 + 70r^{268} t^3 + 70r^{269} t^2 - 190r^{270} t^{10} + 70r^{271} t^9 + 70r^{272} t^8 + \\ & 70r^{273} t^7 + 70r^{274} t^6 + 70r^{275} t^5 + 70r^{276} t^4 + 70r^{277} t^3 + 70r^{278} t^2 - 190r^{279} t^{10} + 70r^{280} t^9 + 70r^{281} t^8 + \\ & 70r^{282} t^7 + 70r^{283} t^6 + 70r^{284} t^5 + 70r^{285} t^4 + 70r^{286} t^3 + 70r^{287} t^2 - 190r^{288} t^{10} + 70r^{289} t^9 + 70r^{290} t^8 + \\ & 70r^{291} t^7 + 70r^{292} t^6 + 70r^{293} t^5 + 70r^{294} t^4 + 70r^{295} t^3 + 70r^{296} t^2 - 190r^{297} t^{10} + 70r^{298} t^9 + 70r^{299} t^8 + \\ & 70r^{300} t^7 + 70r^{301} t^6 + 70r^{302} t^5 + 70r^{303} t^4 + 70r^{304} t^3 + 70r^{305} t^2 - 190r^{306} t^{10} + 70r^{307} t^9 + 70r^{308} t^8 + \\ & 70r^{309} t^7 + 70r^{310} t^6 + 70r^{311} t^5 + 70r^{312} t^4 + 70r^{313} t^3 + 70r^{314} t^2 - 190r^{315} t^{10} + 70r^{316} t^9 + 70r^{317} t^8 + \\ & 70r^{318} t^7 + 70r^{319} t^6 + 70r^{320} t^5 + 70r^{321} t^4 + 70r^{322} t^3 + 70r^{323} t^2 - 190r^{324} t^{10} + 70r^{325} t^9 + 70r^{326} t^8 + \\ & 70r^{327} t^7 + 70r^{328} t^6 + 70r^{329} t^5 + 70r^{330} t^4 + 70r^{331} t^3 + 70r^{332} t^2 - 190r^{333} t^{10} + 70r^{334} t^9 + 70r^{335} t^8 + \\ & 70r^{336} t^7 + 70r^{337} t^6 + 70r^{338} t^5 + 70r^{339} t^4 + 70r^{340} t^3 + 70r^{341} t^2 - 190r^{342} t^{10} + 70r^{343} t^9 + 70r^{344} t^8 + \\ & 70r^{345} t^7 + 70r^{346} t^6 + 70r^{347} t^5 + 70r^{348} t^4 + 70r^{349} t^3 + 70r^{350} t^2 - 190r^{351} t^{10} + 70r^{352} t^9 + 70r^{353} t^8 + \\ & 70r^{354} t^7 + 70r^{355} t^6 + 70r^{356} t^5 + 70r^{357} t^4 + 70r^{358} t^3 + 70r^{359} t^2 - 190r^{360} t^{10} + 70r^{361} t^9 + 70r^{362} t^8 + \\ & 70r^{363} t^7 + 70r^{364} t^6 + 70r^{365} t^5 + 70r^{366} t^4 + 70r^{367} t^3 + 70r^{368} t^2 - 190r^{369} t^{10} + 70r^{370} t^9 + 70r^{371} t^8 + \\ & 70r^{372} t^7 + 70r^{373} t^6 + 70r^{374} t^5 + 70r^{375} t^4 + 70r^{376} t^3 + 70r^{377} t^2 - 190r^{378} t^{10} + 70r^{379} t^9 + 70r^{380} t^8 + \\ & 70r^{381} t^7 + 70r^{382} t^6 + 70r^{383} t^5 + 70r^{384} t^4 + 70r^{385} t^3 + 70r^{386} t^2 - 190r^{387} t^{10} + 70r^{388} t^9 + 70r^{389} t^8 + \\ & 70r^{390} t^7 + 70r^{391} t^6 + 70r^{392} t^5 + 70r^{393} t^4 + 70r^{394} t^3 + 70r^{395} t^2 - 190r^{396} t^{10} + 70r^{397} t^9 + 70r^{398} t^8 + \\ & 70r^{399} t^7 + 70r^{400} t^6 + 70r^{401} t^5 + 70r^{402} t^4 + 70r^{403} t^3 + 70r^{404} t^2 - 190r^{405} t^{10} + 70r^{406} t^9 + 70r^{407} t^8 + \\ & 70r^{408} t^7 + 70r^{409} t^6 + 70r^{410} t^5 + 70r^{411} t^4 + 70r^{412} t^3 + 70r^{413} t^2 - 190r^{414} t^{10} + 70r^{415} t^9 + 70r^{416} t^8 + \\ & 70r^{417} t^7 + 70r^{418} t^6 + 70r^{419} t^5 + 70r^{420} t^4 + 70r^{421} t^3 + 70r^{422} t^2 - 190r^{423} t^{10} + 70r^{424} t^9 + 70r^{425} t^8 + \\ & 70r^{426} t^7 + 70r^{427} t^6 + 70r^{428} t^5 + 70r^{429} t^4 + 70r^{430} t^3 + 70r^{431} t^2 - 190r^{432} t^{10} + 70r^{433} t^9 + 70r^{434} t^8 + \\ & 70r^{435} t^7 + 70r^{436} t^6 + 70r^{437} t^5 + 70r^{438} t^4 + 70r^{439} t^3 + 70r^{440} t^2 - 190r^{441} t^{10} + 70r^{442} t^9 + 70r^{443} t^8 + \\ & 70r^{444} t^7 + 70r^{445} t^6 + 70r^{446} t^5 + 70r^{447} t^4 + 70r^{448} t^3 + 70r^{449} t^2 - 190r^{450} t^{10} + 70r^{451} t^9 + 70r^{452} t^8 + \\ & 70r^{453} t^7 + 70r^{454} t^6 + 70r^{455} t^5 + 70r^{456} t^4 + 70r^{457} t^3 + 70r^{458} t^2 - 190r^{459} t^{10} + 70r^{460} t^9 + 70r^{461} t^8 + \\ & 70r^{462} t^7 + 70r^{463} t^6 + 70r^{464} t^5 + 70r^{465} t^4 + 70r^{466} t^3 + 70r^{467} t^2 - 190r^{468} t^{10} + 70r^{469} t^9 + 70r^{470} t^8 + \\ & 70r^{471} t^7 + 70r^{472} t^6 + 70r^{473} t^5 + 70r^{474} t^4 + 70r^{475} t^3 + 70r^{476} t^2 - 190r^{477} t^{10} + 70r^{478} t^9 + 70r^{479} t^8 + \\ & 70r^{480} t^7 + 70r^{481} t^6 + 70r^{482} t^5 + 70r^{483} t^4 + 70r^{484} t^3 + 70r^{485} t^2 - 190r^{486} t^{10} + 70r^{487} t^9 + 70r^{488} t^8 + \\ & 70r^{489} t^7 + 70r^{490} t^6 + 70r^{491} t^5 + 70r^{492} t^4 + 70r^{493} t^3 + 70r^{494} t^2 - 190r^{495} t^{10} + 70r^{496} t^9 + 70r^{497} t^8 + \\ & 70r^{498} t^7 + 70r^{499} t^6 + 70r^{500} t^5 + 70r^{501} t^4 + 70r^{502} t^3 + 70r^{503} t^2 - 190r^{504} t^{10} + 70r^{505} t^9 + 70r^{506} t^8 + \\ & 70r^{507} t^7 + 70r^{508} t^6 + 70r^{509} t^5 + 70r^{510} t^4 + 70r^{511} t^3 + 70r^{512} t^2 - 190r^{513} t^{10} + 70r^{514} t^9 + 70r^{515} t^8 + \\ & 70r^{516} t^7 + 70r^{517} t^6 + 70r^{518} t^5 + 70r^{519} t^4 + 70r^{520} t^3 + 70r^{521} t^2 - 190r^{522} t^{10} + 70r^{523} t^9 + 70r^{524} t^8 + \\ & 70r^{525} t^7 + 70r^{526} t^6 + 70r^{527} t^5 + 70r^{528} t^4 + 70r^{529} t^3 + 70r^{530} t^2 - 190r^{531} t^{10} + 70r^{532} t^9 + 70r^{533} t^8 + \\ & 70r^{534} t^7 + 70r^{535} t^6 + 70r^{536} t^5 + 70r^{537} t^4 + 70r^{538} t^3 + 70r^{539} t^2 - 190r^{540} t^{10} + 70r^{541} t^9 + 70r^{542} t^8 + \\ & 70r^{543} t^7 + 70r^{544} t^6 + 70r^{545} t^5 + 70r^{546} t^4 + 70r^{547} t^3 + 70r^{548} t^2 - 190r^{549} t^{10} + 70r^{550} t^9 + 70r^{551} t^8 + \\ & 70r^{552} t^7 + 70r^{553} t^6 + 70r^{554} t^5 + 70r^{555} t^4 + 70r^{556} t^3 + 70r^{557} t^2 - 190r^{558} t^{10} + 70r^{559} t^9 + 70r^{560} t^8 + \\ & 70r^{561} t^7 + 70r^{562} t^6 + 70r^{563} t^5 + 70r^{564} t^4 + 70r^{565} t^3 + 70r^{566} t^2 - 190r^{567} t^{10} + 70r^{568} t^9 + 70r^{569} t^8 + \\ & 70r^{570} t^7 + 70r^{571} t^6 + 70r^{572} t^5 + 70r^{573} t^4 + 70r^{574} t^3 + 70r^{575} t^2 - 190r^{576} t^{10} + 70r^{577} t^9 + 70r^{578} t^8 + \\ & 70r^{579} t^7 + 70r^{580} t^6 + 70r^{581} t^5 + 70r^{582} t^4 + 70r^{583} t^3 + 70r^{584} t^2 - 190r^{585} t^{10} + 70r^{586} t^9 + 70r^{587} t^8 + \\ & 70r^{588} t^7 + 70r^{589} t^6 + 70r^{590} t^5 + 70r^{591} t^4 + 70r^{592} t^3 + 70r^{593} t^2 - 190r^{594} t^{10} + 70r^{595} t^9 + 70r^{596} t^8 + \\ & 70r^{597} t^7 + 70r^{598} t^6 + 70r^{599} t^5 + 70r^{600} t^4 + 70r^{601} t^3 + 70r^{602} t^2 - 190r^{603} t^{10} + 70r^{604} t^9 + 70r^{605} t^8 + \\ & 70r^{606} t^7 + 70r^{607} t^6 + 70r^{608} t^5 + 70r^{609} t^4 + 70r^{610} t^3 + 70r^{611} t^2 - 190r^{612} t^{10} + 70r^{613} t^9 + 70r^{614} t^8 + \\ & 70r^{615} t^7 + 70r^{616} t^6 + 70r^{617} t^5 + 70r^{618} t^4 + 70r^{619} t^3 + 70r^{620} t^2 - 190r^{621} t^{10} + 70r^{622} t^9 + 70r^{623} t^8 + \\ & 70r^{624} t^7 + 70r^{625} t^6 + 70r^{626} t^5 + 70r^{627} t^4 + 70r^{628} t^3 + 70r^{629} t^2 - 190r^{630} t^{10} + 70r^{631} t^9 + 70r^{632} t^8 + \\ & 70r^{633} t^7 + 70r^{634} t^6 + 70r^{635} t^5 + 70r^{636} t^4 + 70r^{637} t^3 + 70r^{638} t^2 - 190r^{639} t^{10} + 70r^{640} t^9 + 70r^{641} t^8 + \\ & 70r^{642} t^7 + 70r^{643} t^6 + 70r^{644} t^5 + 70r^{645} t^4 + 70r^{646} t^3 + 70r^{647} t^2 - 190r^{648} t^{10} + 70r^{649} t^9 + 70r^{650} t^8 + \\ & 70r^{651} t^7 + 70r^{652} t^6 + 70r^{653} t^5 + 70r^{654} t^4 + 70r^{655} t^3 + 70r^{656} t^2 - 190r^{657} t^{10} + 70r^{658} t^9 + 70r^{659} t^8 + \\ & 70r^{660} t^7 + 70r^{661} t^6 + 70r^{662} t^5 + 70r^{663} t^4 + 70r^{664} t^3 + 70r^{665} t^2 - 190r^{666} t^{10} + 70r^{667} t^9 + 70r^{668} t^8 + \\ & 70r^{669} t^7 + 70r^{670} t^6 + 70r^{671} t^5 + 70r^{672} t^4 + 70r^{673} t^3 + 70r^{674} t^2 - 190r^{675} t^{10} + 70r^{676} t^9 + 70r^{677} t^8 + \\ & 70r^{678} t^7 + 70r^{679} t^6 + 70r^{680} t^5 + 70r^{681} t^4 + 70r^{682} t^3 + 70r^{683} t^2 - 190r^{684} t^{10} + 70r^{685} t^9 + 70r^{686} t^8 + \\ & 70r^{687} t^7 + 70r^{688} t^6 + 70r^{689} t^5 + 70r^{690} t^4 + 70r^{691} t^3 + 70r^{692} t^2 - 190r^{693} t^{10} + 70r^{694} t^9 + 70r^{695} t^8 + \\ & 70r^{696} t^7 + 70r^{697} t^6 + 70r^{698} t^5 + 70r^{699} t^4 + 70r^{700} t^3 + 70r^{701} t^2 - 190r^{702} t^{10} + 70r^{703} t^9 + 70r^{704} t^8 + \\ & 70r^{705} t^7 + 70r^{706} t^6 + 70r^{707} t^5 + 70r^{708} t^4 + 70r^{709} t^3 + 70r^{710} t^2 - 190r^{711} t^{10} + 70r^{712} t^9 + 70r^{713} t^8 + \\ & 70r^{714} t^7 + 70r^{715} t^6 + 70r^{716} t^5 + 70r^{717} t^4 + 70r^{718} t^3 + 70r^{719} t^2 - 190r^{720} t^{10} + 70r^{721} t^9 + 70r^{722} t^8 + \\ & 70r^{723} t^7 + 70r^{724} t^6 + 70r^{725} t^5 + 70r^{726} t^4 + 70r^{727} t^3 + 70r^{728} t^2 - 190r^{729} t^{10} + 70r^{730} t^9 + 70r^{731} t^8 + \\ & 70r^{732} t^7 + 70r^{733} t^6 + 70r^{734} t^5 + 70r^{735} t^4 + 70r^{736} t^3 + 70r^{737} t^2 - 190r^{738} t^{10} + 70r^{739} t^9 + 70r^{740} t^8 + \\ & 70r^{741} t^7 + 70r^{742} t^6 + 70r^{743} t^5 + 70r^{744} t^4 + 70r^{745} t^3 + 70r^{746} t^2 - 190r^{747} t^{10} + 70r^{748} t^9 + 70r^{749} t^8 + \\ & 70r^{750} t^7 + 70r^{751} t^6 + 70r^{752} t^5 + 70r^{753} t^4 + 70r^{754} t^3 + 70r^{755} t^2 - 190r^{756} t^{10} + 70r^{757} t^9 + 70r^{758} t^8 + \\ & 70r^{759} t^7 + 70r^{760} t^6 + 70r^{761} t^5 + 70r^{762} t^4 + 70r^{763} t^3 + 70r^{764} t^2 - 190r^{765} t^{10} + 70r^{766} t^9 + 70r^{767} t^8 + \\ & 70r^{768} t^7 + 70r^{769} t^6 + 70r^{770} t^5 + 70r^{771} t^4 + 70r^{772} t^3 + 70r^{773} t^2 - 190r^{774} t^{10} + 70r^{775} t^9 + 70r^{776} t^8 + \\ & 70r^{777} t^7 + 70r^{778} t^6 + 70r^{779} t^5 + 70r^{780} t^4 + 70r^{781} t^3 + 70r^{782} t^2 - 190r^{783} t^{10} + 70r^{784} t^9 + 70r^{785} t^8 + \\ & 70r^{786} t^7 + 70r^{787} t^6 + 70r^{788} t^5 + 70r^{789} t^4 + 70r^{790} t^3 + 70r^{791} t^2 - 190r^{792} t^{10} + 70r^{793} t^9 + 70r^{794} t^8 + \\ & 70r^{795} t^7 + 70r^{796} t^6 + 70r^{797} t^5 + 70r^{798} t^4 + 70r^{799} t^3 + 70r^{800} t^2 - 190r^{801} t^{10} + 70r^{802} t^9 + 70r^{803} t^8 + \\ & 70r^{804} t^7 + 70r^{805} t^6 + 70r^{806} t^5 + 70r^{807} t^4 + 70r^{808} t^3 + 70r^{809} t^2 - 190r^{810} t^{10} + 70r^{811} t^9 + 70r^{812} t^8 + \\ & 70r^{813} t^7 +$$

$$\begin{aligned}
& (4r^2s^2t^3 + 4r^2s^3t^2 + 4r^3s^2t^2)) / (1512h^5r^3s^3t^3) - ((x - x_n)^{12}(4rs + 4rt + 4st + 4rs^2 + 4r^2s + \\
& 4rt^2 + 4r^2t + 4st^2 + 4s^2t + 4rst^2 + 4rs^2t + 4r^2st + 15rst)) / (11880h^8r^3s^3t^3) + (h^2(x - \\
& x_n)^2(260r^2s^9 - 884r^3s^8 + 546r^4s^7 + 546r^5s^6 + 546r^6s^5 + 546r^7s^4 - 884r^8s^3 + 260r^9s^2 - \\
& 260r^2s^{10} + 780r^3s^9 - 364r^4s^8 - 364r^5s^7 - 364r^6s^6 - 364r^7s^5 - 364r^8s^4 + 780r^9s^3 - 260r^{10}s^2 + \\
& 70r^2s^{11} - 190r^3s^{10} + 70r^4s^9 + 70r^5s^8 + 70r^6s^7 + 70r^7s^6 + 70r^8s^5 + 70r^9s^4 - 190r^{10}s^3 + \\
& 70r^{11}s^2 + 260r^2t^9 - 884r^3t^8 + 546r^4t^7 + 546r^5t^6 + 546r^6t^5 + 546r^7t^4 - 884r^8t^3 + 260r^9t^2 - \\
& 260r^2t^{10} + 780r^3t^9 - 364r^4t^8 - 364r^5t^7 - 364r^6t^6 - 364r^7t^5 - 364r^8t^4 + 780r^9t^3 - 260r^{10}t^2 + \\
& 70r^2t^{11} - 190r^3t^{10} + 70r^4t^9 + 70r^5t^8 + 70r^6t^7 + 70r^7t^6 + 70r^8t^5 + 70r^9t^4 - 190r^{10}t^3 + 70r^{11}t^2 + \\
& 260s^2t^9 - 884s^3t^8 + 546s^4t^7 + 546s^5t^6 + 546s^6t^5 + 546s^7t^4 - 884s^8t^3 + 260s^9t^2 - 260s^2t^{10} + \\
& 780s^3t^9 - 364s^4t^8 - 364s^5t^7 - 364s^6t^6 - 364s^7t^5 - 364s^8t^4 + 780s^9t^3 - 260s^{10}t^2 + 70s^2t^{11} - \\
& 190s^3t^{10} + 70s^4t^9 + 70s^5t^8 + 70s^6t^7 + 70s^7t^6 + 70s^8t^5 + 70s^9t^4 - 190s^{10}t^3 + 70s^{11}t^2 + 520rst^9 + \\
& 520rs^9t + 520r^9st - 520rst^{10} - 520rs^{10}t - 520r^{10}st + 140rst^{11} + 140rs^{11}t + 140r^{11}st - \\
& 2106rs^2t^8 + 2756rs^3t^7 - 819rs^4t^6 - 819rs^5t^5 - 819rs^6t^4 + 2756rs^7t^3 - 2106rs^8t^2 - 2106r^2st^8 - \\
& 2106r^2s^8t + 2756r^3st^7 + 2756r^3s^7t - 819r^4st^6 - 819r^4s^6t - 819r^5st^5 - 819r^5s^5t - 819r^6st^4 - \\
& 819r^6s^4t + 2756r^7st^3 + 2756r^7s^3t - 2106r^8st^2 - 2106r^8s^2t + 2080rs^2t^9 - 2704rs^3t^8 + 728rs^4t^7 + \\
& 728rs^5t^6 + 728rs^6t^5 + 728rs^7t^4 - 2704rs^8t^3 + 2080rs^9t^2 + 2080r^2st^9 + 2080r^2s^9t - 2704r^3st^8 - \\
& 2704r^3s^8t + 728r^4st^7 + 728r^4s^7t + 728r^5st^6 + 728r^5s^6t + 728r^6st^5 + 728r^6s^5t + 728r^7st^4 + \\
& 728r^7s^4t - 2704r^8st^3 - 2704r^8s^3t + 2080r^9st^2 + 2080r^9s^2t - 695rs^2t^{10} + 1125rs^3t^9 - 357rs^4t^8 - \\
& 357rs^5t^7 - 357rs^6t^6 - 357rs^7t^5 - 357rs^8t^4 + 1125rs^9t^3 - 695rs^{10}t^2 - 695r^2st^{10} - 695r^2s^{10}t + \\
& 1125r^3st^9 + 1125r^3s^9t - 357r^4st^8 - 357r^4s^8t - 357r^5st^7 - 357r^5s^7t - 357r^6st^6 - 357r^6s^6t + \\
& 357r^7st^5 - 357r^7s^5t - 357r^8st^4 - 357r^8s^4t + 1125r^9st^3 + 1125r^9s^3t - 695r^{10}st^2 - 695r^{10}s^2t + \\
& 70rs^2t^{11} - 190rs^3t^{10} + 70rs^4t^9 + 70rs^5t^8 + 70rs^6t^7 + 70rs^7t^6 + 70rs^8t^5 + 70rs^9t^4 - 190rs^{10}t^3 + \\
& 70rs^{11}t^2 + 70r^2st^{11} + 70r^2s^{11}t - 190r^3st^{10} - 190r^3s^{10}t + 70r^4st^9 + 70r^4s^9t + 70r^5st^8 + 70r^5s^8t + \\
& 70r^6st^7 + 70r^6s^7t + 70r^7st^6 + 70r^7s^6t + 70r^8st^5 + 70r^8s^5t + 70r^9st^4 + 70r^9s^4t - 190r^{10}st^3 - \\
& 190r^{10}s^3t + 70r^{11}st^2 + 70r^{11}s^2t + 4420r^2s^2t^7 + 1417r^2s^3t^6 - 10738r^2s^4t^5 - 10738r^2s^5t^4 + \\
& 1417r^2s^6t^3 + 4420r^2s^7t^2 + 1417r^3s^2t^6 - 18746r^3s^3t^5 + 46319r^3s^4t^4 - 18746r^3s^5t^3 + 1417r^3s^6t^2 - \\
& 10738r^4s^2t^5 + 46319r^4s^3t^4 + 46319r^4s^4t^3 - 10738r^4s^5t^2 - 10738r^5s^2t^4 - 18746r^5s^3t^3 - 10738r^5s^4t^2 + \\
& 1417r^6s^2t^3 + 1417r^6s^3t^2 + 4420r^7s^2t^2 - 4680r^2s^2t^8 + 1976r^2s^3t^7 + 2548r^2s^4t^6 + 2548r^2s^5t^5 + \\
& 2548r^2s^6t^4 + 1976r^2s^7t^3 - 4680r^2s^8t^2 + 1976r^3s^2t^7 + 2912r^3s^3t^6 - 5096r^3s^4t^5 - 5096r^3s^5t^4 + \\
& 2912r^3s^6t^3 + 1976r^3s^7t^2 + 2548r^4s^2t^6 - 5096r^4s^3t^5 - 13104r^4s^4t^4 - 5096r^4s^5t^3 + 2548r^4s^6t^2 + \\
& 2548r^5s^2t^5 - 5096r^5s^3t^4 - 5096r^5s^4t^3 + 2548r^5s^5t^2 + 2548r^6s^2t^4 + 2912r^6s^3t^3 + 2548r^6s^4t^2 + \\
& 1976r^7s^2t^3 + 1976r^7s^3t^2 - 4680r^8s^2t^2 + 2110r^2s^2t^9 - 2492r^2s^3t^8 + 602r^2s^4t^7 + 602r^2s^5t^6 + \\
& 602r^2s^6t^5 + 602r^2s^7t^4 - 2492r^2s^8t^3 + 2110r^2s^9t^2 - 2492r^3s^2t^8 + 2058r^3s^3t^7 + 147r^3s^4t^6 + \\
& 147r^3s^5t^5 + 147r^3s^6t^4 + 2058r^3s^7t^3 - 2492r^3s^8t^2 + 602r^4s^2t^7 + 147r^4s^3t^6 - 1764r^4s^4t^5 - \\
& 1764r^4s^5t^4 + 147r^4s^6t^3 + 602r^4s^7t^2 + 602r^5s^2t^6 + 147r^5s^3t^5 - 1764r^5s^4t^4 + 147r^5s^5t^3 + \\
& 602r^5s^6t^2 + 602r^6s^2t^5 + 147r^6s^3t^4 + 147r^6s^4t^3 + 602r^6s^5t^2 + 602r^7s^2t^4 + 2058r^7s^3t^3 + 602r^7s^4t^2 - \\
& 2492r^8s^2t^3 - 2492r^8s^3t^2 + 2110r^9s^2t^2 - 380r^2s^2t^{10} + 660r^2s^3t^9 - 224r^2s^4t^8 - 224r^2s^5t^7 - \\
& 224r^2s^6t^6 - 224r^2s^7t^5 - 224r^2s^8t^4 + 660r^2s^9t^3 - 380r^2s^{10}t^2 + 660r^3s^2t^9 - 588r^3s^3t^8 - 42r^3s^4t^7 - \\
& 42r^3s^5t^6 - 42r^3s^6t^5 - 42r^3s^7t^4 - 588r^3s^8t^3 + 660r^3s^9t^2 - 224r^4s^2t^8 - 42r^4s^3t^7 + 504r^4s^4t^6 + \\
& 504r^4s^5t^5 + 504r^4s^6t^4 - 42r^4s^7t^3 - 224r^4s^8t^2 - 224r^5s^2t^7 - 42r^5s^3t^6 + 504r^5s^4t^5 + 504r^5s^5t^4 - \\
& 42r^5s^6t^3 - 224r^5s^7t^2 - 224r^6s^2t^6 - 42r^6s^3t^5 + 504r^6s^4t^4 - 42r^6s^5t^3 - 224r^6s^6t^2 - 224r^7s^2t^5 - \\
& 42r^7s^3t^4 - 42r^7s^4t^3 - 224r^7s^5t^2 - 224r^8s^2t^4 - 588r^8s^3t^3 - 224r^8s^4t^2 + 660r^9s^2t^3 + 660r^9s^3t^2 - \\
& 380r^{10}s^2t^2)) / (2162160r^3s^3t^3) - (h^3(x - x_n)(546r^3s^6 - 884r^2s^7 + 546r^4s^5 + 546r^5s^4 - 884r^7s^3 + 780r^8s^2 - \\
& 190r^2s^9 + 70r^3s^8 + 70r^4s^7 + 70r^5s^6 + 70r^6s^5 + 70r^7s^4 + 70r^8s^3 - 190r^9s^2 - 884r^2t^7 + 546r^3t^6 + \\
& 546r^4t^5 + 546r^5t^4 + 546r^6t^3 - 884r^7t^2 + 780r^2t^8 - 364r^3t^7 - 364r^4t^6 - 364r^5t^5 - 364r^6t^4 - \\
& 364r^7t^3 + 780r^8t^2 - 190r^2t^9 + 70r^3t^8 + 70r^4t^7 + 70r^5t^6 + 70r^6t^5 + 70r^7t^4 + 70r^8t^3 - 190r^9t^2 - \\
& 884s^2t^7 + 546s^3t^6 + 546s^4t^5 + 546s^5t^4 + 546s^6t^3 - 884s^7t^2 + 780s^2t^8 - 364s^3t^7 - 364s^4t^6 - \\
& 364s^5t^5 - 364s^6t^4 - 364s^7t^3 + 780s^8t^2 - 190s^2t^9 + 70s^3t^8 + 70s^4t^7 + 70s^5t^6 + 70s^6t^5 + 70s^7t^4 + \\
& 70s^8t^3 - 190s^9t^2 + 260rs^8 + 260r^8s - 260rs^9 - 260r^9s + 70rs^{10} + 70r^{10}s + 260rt^8 + 260r^8t - \\
& 260rt^9 - 260r^9t + 70rt^{10} + 70r^{10}t + 260st^8 + 260s^8t - 260st^9 - 260s^9t + 70st^{10} + 70s^{10}t - 1222rs^7t - \\
& 1222r^7st + 1300rst^8 + 1300rs^8t + 1300r^8st - 505rst^9 - 505rs^9t - 505r^9st + 70rst^{10} + \\
& 70rs^{10}t + 70r^{10}st + 2210rs^2t^6 - 1365rs^3t^5 - 1365rs^4t^4 - 1365rs^5t^3 + 2210rs^6t^2 + 2210r^2st^6 + \\
& 2210r^2s^6t - 1365r^3st^5 - 1365r^3s^5t - 1365r^4st^4 - 1365r^4s^4t - 1365r^5st^3 - 1365r^5s^3t + 2210r^6st^2 + \\
& 2210r^6s^2t - 2340rs^2t^7 + 1092rs^3t^6 + 1092rs^4t^5 + 1092rs^5t^4 + 1092rs^6t^3 - 2340rs^7t^2 - 2340r^2st^7 -
\end{aligned}$$

$$\begin{aligned}
& 2340r^2s^7t + 1092r^3st^6 + 1092r^3s^6t + 1092r^4st^5 + 1092r^4s^5t + 1092r^5st^4 + 1092r^5s^4t + 1092r^6st^3 + \\
& 1092r^6s^3t - 2340r^7st^2 - 2340r^7s^2t + 1055rs^2t^8 - 427rs^3t^7 - 427rs^4t^6 - 427rs^5t^5 - 427rs^6t^4 - \\
& 427rs^7t^3 + 1055rs^8t^2 + 1055r^2st^8 + 1055r^2s^8t - 427r^3st^7 - 427r^3s^7t - 427r^4st^6 - 427r^4s^6t - \\
& 427r^5st^5 - 427r^5s^5t - 427r^6st^4 - 427r^6s^4t - 427r^7st^3 - 427r^7s^3t + 1055r^8st^2 + 1055r^8s^2t - \\
& 190rs^2t^9 + 70rs^3t^8 + 70rs^4t^7 + 70rs^5t^6 + 70rs^6t^5 + 70rs^7t^4 + 70rs^8t^3 - 190rs^9t^2 - 190r^2st^9 - \\
& 190r^2s^9t + 70r^3st^8 + 70r^3s^8t + 70r^4st^7 + 70r^4s^7t + 70r^5st^6 + 70r^5s^6t + 70r^6st^5 + 70r^6s^5t + \\
& 70r^7st^4 + 70r^7s^4t + 70r^8st^3 + 70r^8s^3t - 190r^9st^2 - 190r^9s^2t + 2782r^2s^2t^5 - 9373r^2s^3t^4 - \\
& 9373r^2s^4t^3 + 2782r^2s^5t^2 - 9373r^3s^2t^4 + 55692r^3s^3t^3 - 9373r^3s^4t^2 - 9373r^4s^2t^3 - 9373r^4s^3t^2 + \\
& 2782r^5s^2t^2 + 884r^2s^2t^6 + 1456r^2s^3t^5 + 1456r^2s^4t^4 + 1456r^2s^5t^3 + 884r^2s^6t^2 + 1456r^3s^2t^5 - \\
& 6552r^3s^3t^4 - 6552r^3s^4t^3 + 1456r^3s^5t^2 + 1456r^4s^2t^4 - 6552r^4s^3t^3 + 1456r^4s^4t^2 + 1456r^5s^2t^3 + \\
& 1456r^5s^3t^2 + 884r^6s^2t^2 - 2065r^2s^2t^7 + 1029r^2s^3t^6 + 1029r^2s^4t^5 + 1029r^2s^5t^4 + 1029r^2s^6t^3 - \\
& 2065r^2s^7t^2 + 1029r^3s^2t^6 - 882r^3s^3t^5 - 882r^3s^4t^4 - 882r^3s^5t^3 + 1029r^3s^6t^2 + 1029r^4s^2t^5 - \\
& 882r^4s^3t^4 - 882r^4s^4t^3 + 1029r^4s^5t^2 + 1029r^5s^2t^4 - 882r^5s^3t^3 + 1029r^5s^4t^2 + 1029r^6s^2t^3 + \\
& 1029r^6s^3t^2 - 2065r^7s^2t^2 + 590r^2s^2t^8 - 294r^2s^3t^7 - 294r^2s^4t^6 - 294r^2s^5t^5 - 294r^2s^6t^4 - \\
& 294r^2s^7t^3 + 590r^2s^8t^2 - 294r^3s^2t^7 + 252r^3s^3t^6 + 252r^3s^4t^5 + 252r^3s^5t^4 + 252r^3s^6t^3 - 294r^3s^7t^2 - \\
& 294r^4s^2t^6 + 252r^4s^3t^5 + 252r^4s^4t^4 + 252r^4s^5t^3 - 294r^4s^6t^2 - 294r^5s^2t^5 + 252r^5s^3t^4 + 252r^5s^4t^3 - \\
& 294r^5s^5t^2 - 294r^6s^2t^4 + 252r^6s^3t^3 - 294r^6s^4t^2 - 294r^7s^2t^3 - 294r^7s^3t^2 + 590r^8s^2t^2)) / (2162160r^2s^2t^2) - \\
& ((x - x_n)^8(4r^2s^3 + 4r^3s^2 + 4r^3s^3 + 4r^2t^3 + 4r^3t^2 + 4r^3t^3 + 4s^2t^3 + 4s^3t^2 + 4s^3t^3 + 7rst^3 + \\
& 7rs^3t + 7r^3st + 20rs^2t^2 + 20r^2st^2 + 20r^2s^2t + 20rs^2t^3 + 20rs^3t^2 + 20r^2st^3 + 20r^2s^3t + 20r^3st^2 + \\
& 20r^3s^2t + 7rs^3t^3 + 7r^3st^3 + 7r^3s^3t + 48r^2s^2t^2 + 20r^2s^2t^3 + 20r^2s^3t^2 + 20r^3s^2t^2 + 4r^2s^3t^3 + \\
& 4r^3s^2t^3 + 4r^3s^3t^2)) / (1680h^4r^3s^3t^3),
\end{aligned}$$

$$\begin{aligned}
\beta_r = & ((x - x_n)^{12}(8rs - 12r^2t^2 - 12r^2s^2 + 8rt - 4st + 8rs^2 - 19r^2s + 9r^3s + 8rt^2 - 19r^2t + 9r^3t - \\
& 4st^2 - 4s^2t - 12r^2 + 9r^3 + 9r^4 + 8rst^2 + 8rs^2t - 19r^2st + 21rst)) / (11880h^8r^3(r - s)^3(r - t)^3(r - \\
& 1)^3) + ((x - x_n)^8(5r^2s^3 - 7r^3s^2 - 7r^3s^3 + 9r^4s^2 + 5r^2t^3 - 7r^3t^2 - 7r^3t^3 + 9r^4t^2 - 4s^2t^3 - 4s^3t^2 - \\
& 4s^3t^3 + 5rst^3 + 5rs^3t - 28r^3st + 36r^4st + 4rs^2t^2 + 13r^2st^2 + 13r^2s^2t + 4rs^2t^3 + 4rs^3t^2 + 13r^2st^3 + \\
& 13r^2s^3t - 47r^3st^2 - 47r^3s^2t + 5rs^3t^3 - 28r^3st^3 - 28r^3s^3t + 36r^4st^2 + 36r^4s^2t + 24r^2s^2t^2 + \\
& 13r^2s^2t^3 + 13r^2s^3t^2 - 47r^3s^2t^2 + 5r^2s^3t^3 - 7r^3s^2t^3 - 7r^3s^3t^2 + 9r^4s^2t^2)) / (1680h^4r^3(r - s)^3(r - \\
& t)^3(r - 1)^3) - ((x - x_n)^9(2r^2s^2 + 2r^2s^3 - 10r^3s^2 - 7r^3s^3 + 9r^4s^2 + 2r^2t^2 + 2r^2t^3 - 10r^3t^2 - \\
& 7r^3t^3 + 9r^4t^2 - 4s^2t^2 - 4s^2t^3 - 4s^3t^2 - s^3t^3 + 2rs^3 - 7r^3s + 9r^4s + 2rt^3 - 7r^3t + 9r^4t - \\
& st^3 - s^3t + 7rst^2 + 7rs^2t - 2r^2st + 7rst^3 + 7rs^3t - 26r^3st + 36r^4st + 12rs^2t^2 + 3r^2st^2 + \\
& 3r^2s^2t + 7rs^2t^3 + 7rs^3t^2 - 2r^2st^3 - 2r^2s^3t - 26r^3st^2 - 26r^3s^2t + 2rs^3t^3 - 7r^3st^3 - 7r^3s^3t + \\
& 9r^4st^2 + 9r^4s^2t + 3r^2s^2t^2 + 2r^2s^2t^3 + 2r^2s^3t^2 - 10r^3s^2t^2)) / (1512h^5r^3(r - s)^3(r - t)^3(r - \\
& 1)^3) + (h^2(x - x_n)^2(1690r^3s^8 - 520r^2s^9 - 312r^4s^7 - 312r^5s^6 - 312r^6s^5 - 312r^7s^4 - 3887r^8s^3 + \\
& 4550r^9s^2 + 520r^2s^{10} - 780r^3s^9 - 2002r^4s^8 + 572r^5s^7 + 572r^6s^6 + 572r^7s^5 + 572r^8s^4 + 9009r^9s^3 - \\
& 10790r^{10}s^2 - 140r^2s^{11} - 385r^3s^{10} + 2020r^4s^9 - 320r^5s^8 - 320r^6s^7 - 320r^7s^6 - 320r^8s^5 - \\
& 320r^9s^4 - 6235r^{10}s^3 + 7870r^{11}s^2 + 210r^3s^{11} - 525r^4s^{10} + 60r^5s^9 + 60r^6s^8 + 60r^7s^7 + 60r^8s^6 + \\
& 60r^9s^5 + 60r^{10}s^4 + 1425r^{11}s^3 - 1890r^{12}s^2 - 520r^2s^{12} + 1690r^3s^{12} - 312r^4s^{12} - 312r^5s^{12} - 312r^6s^{12} - \\
& 312r^7s^{12} - 3887r^8s^{12} + 4550r^9s^{12} + 520r^{10}s^{12} - 780r^{11}s^{12} - 2002r^{12}s^{12} + 572r^5s^{12} + 572r^6s^{12} + 572r^7s^{12} + \\
& 572r^8s^{12} + 9009r^9s^{12} - 10790r^{10}s^{12} - 140r^{11}s^{12} - 385r^{12}s^{12} + 2020r^4s^{12} - 320r^5s^{12} - 320r^6s^{12} - 320r^7s^{12} - \\
& 320r^8s^{12} - 320r^9s^{12} - 6235r^{10}s^{12} + 7870r^{11}s^{12} + 210r^{12}s^{12} - 525r^4s^{12} + 60r^5s^{12} + 60r^6s^{12} + 60r^7s^{12} + \\
& 60r^8s^{12} + 60r^9s^{12} + 60r^{10}s^{12} + 1425r^{11}s^{12} - 1890r^{12}s^{12} + 260s^2t^9 - 884s^3t^8 + 546s^4t^7 + 546s^5t^6 + \\
& 546s^6t^5 + 546s^7t^4 - 884s^8t^3 + 260s^9t^2 - 260s^{10}t + 780s^{11} - 364s^{12} - 364s^{13} - 364s^{14} - 364s^{15} - \\
& 364s^{16} - 364s^{17} - 364s^{18} + 780s^9t^3 - 260s^{10}t^2 + 70s^{11}t - 190s^{12} + 70s^{13} + 70s^{14} + 70s^{15} + 70s^{16} + \\
& 70s^{17} + 70s^{18} - 190s^{10}t^3 + 70s^{11}t^2 - 1365r^{10}s + 3315r^{11}s - 2520r^{12}s + 630r^{13}s - 1365r^{10}t + \\
& 3315r^{11}t - 2520r^{12}t + 630r^{13}t - 260rst^9 - 260rs^9t + 9100r^9st + 260rst^{10} + 260rs^{10}t - 21580r^{10}st - \\
& 70rst^{11} - 70rs^{11}t + 15740r^{11}st - 3780r^{12}st - 234rs^2t^8 + 3770rs^3t^7 - 4095rs^4t^6 - 4095rs^5t^5 - \\
& 4095rs^6t^4 + 3770rs^7t^3 - 234rs^8t^2 + 2340r^2st^8 + 2340r^2s^8t - 6604r^3st^7 - 6604r^3s^7t + 1404r^4st^6 + \\
& 1404r^4s^6t + 1404r^5st^5 + 1404r^5s^5t + 1404r^6st^4 + 1404r^6s^4t + 15704r^7st^3 + 15704r^7s^3t - \\
& 20475r^8st^2 - 20475r^8s^2t - 260rs^2t^9 - 1300rs^3t^8 + 1274rs^4t^7 + 1274rs^5t^6 + 1274rs^6t^5 + \\
& 1274rs^7t^4 - 1300rs^8t^3 - 260rs^9t^2 - 1820r^2st^9 - 1820r^2s^9t + 1976r^3st^8 + 1976r^3s^8t + 7904r^4st^7 + \\
& 7904r^4s^7t - 2392r^5st^6 - 2392r^5s^6t - 2392r^6st^5 - 2392r^6s^5t - 2392r^7st^4 - 2392r^7s^4t - 34996r^8st^3 - \\
& 34996r^8s^3t + 47125r^9st^2 + 47125r^9s^2t + 445rs^{10}t - 855rs^3t^9 + 315rs^4t^8 + 315rs^5t^7 + 315rs^6t^6 + \\
& 315rs^7t^5 + 315rs^8t^4 - 855rs^9t^3 + 445rs^{10}t^2 + 250r^2st^{10} + 250r^2s^{10}t + 1695r^3st^9 + 1695r^3s^9t - \\
& 6768r^4st^8 - 6768r^4s^8t + 1188r^5st^7 + 1188r^5s^7t + 1188r^6st^6 + 1188r^6s^6t + 1188r^7st^5 + 1188r^7s^5t +
\end{aligned}$$

$$\begin{aligned}
& 1188r^8st^4 + 1188r^8s^4t + 22326r^9st^3 + 22326r^9s^3t - 32495r^{10}st^2 - 32495r^{10}s^2t - 140rs^2t^{11} + \\
& 380rs^3t^{10} - 140rs^4t^9 - 140rs^5t^8 - 140rs^6t^7 - 140rs^7t^6 - 140rs^8t^5 - 140rs^9t^4 + 380rs^{10}t^3 - \\
& 140rs^{11}t^2 + 70r^2st^{11} + 70r^2s^{11}t - 700r^3st^{10} - 700r^3s^{10}t + 1555r^4st^9 + 1555r^4s^9t - 200r^5st^8 - \\
& 200r^5s^8t - 200r^6st^7 - 200r^6s^7t - 200r^7st^6 - 200r^7s^6t - 200r^8st^5 - 200r^8s^5t - 200r^9st^4 - \\
& 200r^9s^4t - 4750r^{10}st^3 - 4750r^{10}s^3t + 7405r^{11}st^2 + 7405r^{11}s^2t - 3068r^2s^2t^7 - 494r^2s^3t^6 + \\
& 2366r^2s^4t^5 + 2366r^2s^5t^4 - 494r^2s^6t^3 - 3068r^2s^7t^2 + 5863r^3s^2t^6 + 4147r^3s^3t^5 + 7007r^3s^4t^4 + \\
& 4147r^3s^5t^3 + 5863r^3s^6t^2 - 1144r^4s^2t^5 - 2860r^4s^3t^4 - 2860r^4s^4t^3 - 1144r^4s^5t^2 - 1144r^5s^2t^4 - \\
& 5720r^5s^3t^3 - 1144r^5s^4t^2 - 16874r^6s^2t^3 - 16874r^6s^3t^2 + 32032r^7s^2t^2 + 3042r^2s^2t^8 - 5434r^2s^3t^7 + \\
& 5005r^2s^4t^6 + 5005r^2s^5t^5 + 5005r^2s^6t^4 - 5434r^2s^7t^3 + 3042r^2s^8t^2 + 260r^3s^2t^7 - 1066r^3s^3t^6 - \\
& 5642r^3s^4t^5 - 5642r^3s^5t^4 - 1066r^3s^6t^3 + 260r^3s^7t^2 - 7397r^4s^2t^6 - 4433r^4s^3t^5 - 9009r^4s^4t^4 - \\
& 4433r^4s^5t^3 - 7397r^4s^6t^2 + 1612r^5s^2t^5 + 4576r^5s^3t^4 + 4576r^5s^4t^3 + 1612r^5s^5t^2 + 1612r^6s^2t^4 + \\
& 9152r^6s^3t^3 + 1612r^6s^4t^2 + 36218r^7s^2t^3 + 36218r^7s^3t^2 - 71136r^8s^2t^2 - 1250r^2s^2t^9 + 4678r^2s^3t^8 - \\
& 3304r^2s^4t^7 - 3304r^2s^5t^6 - 3304r^2s^6t^5 - 3304r^2s^7t^4 + 4678r^2s^8t^3 - 1250r^2s^9t^2 - 2015r^3s^2t^8 - \\
& 663r^3s^3t^7 + 1365r^3s^4t^6 + 1365r^3s^5t^5 + 1365r^3s^6t^4 - 663r^3s^7t^3 - 2015r^3s^8t^2 + 4394r^4s^2t^7 + \\
& 2886r^4s^3t^6 + 4914r^4s^4t^5 + 4914r^4s^5t^4 + 2886r^4s^6t^3 + 4394r^4s^7t^2 - 520r^5s^2t^6 - 2028r^5s^3t^5 - \\
& 2028r^5s^4t^4 - 520r^5s^5t^3 - 520r^6s^2t^5 - 2028r^6s^3t^4 - 2028r^6s^4t^3 - 520r^6s^5t^2 - 520r^7s^2t^4 - \\
& 4056r^7s^3t^3 - 520r^7s^4t^2 - 20423r^8s^2t^3 - 20423r^8s^3t^2 + 45292r^9s^2t^2 + 205r^2s^2t^{10} - 1095r^2s^3t^9 + \\
& 595r^2s^4t^8 + 595r^2s^5t^7 + 595r^2s^6t^6 + 595r^2s^7t^5 + 595r^2s^8t^4 - 1095r^2s^9t^3 + 205r^2s^{10}t^2 + \\
& 540r^3s^2t^9 + 228r^3s^3t^8 - 84r^3s^4t^7 - 84r^3s^5t^6 - 84r^3s^6t^5 - 84r^3s^7t^4 + 228r^3s^8t^3 + 540r^3s^9t^2 - \\
& 767r^4s^2t^8 - 507r^4s^3t^7 - 819r^4s^4t^6 - 819r^4s^5t^5 - 819r^4s^6t^4 - 507r^4s^7t^3 - 767r^4s^8t^2 + 52r^5s^2t^7 + \\
& 312r^5s^3t^6 + 312r^5s^4t^5 + 52r^5s^5t^4 + 52r^5s^6t^3 + 312r^6s^3t^5 + 312r^6s^4t^4 + 52r^6s^5t^3 + 52r^6s^6t^2 + 52r^7s^2t^5 + \\
& 312r^7s^3t^4 + 312r^7s^4t^3 + 52r^7s^5t^2 + 52r^8s^2t^4 + 624r^8s^3t^3 + 52r^8s^4t^2 + 3939r^9s^2t^3 + 3939r^9s^3t^2 - \\
& 9620r^{10}s^2t^2)/((2162160r^3(r-s)^3(r-t)^3(r-1)^3) - ((x-x_n)^{10}(4r^2s^2 + 7r^2s^3 + 19r^3s^2 + \\
& 7r^3s^3 - 9r^4s^2 + 4r^2t^2 + 7r^2t^3 + 19r^3t^2 + 7r^3t^3 - 9r^4t^2 + 16s^2t^2 + 4s^2t^3 + 4s^3t^2 - 8rs^2 + 7r^2s - \\
& 8rs^3 + 19r^3s - 36r^4s - 8rt^2 + 7r^2t - 8rt^3 + 19r^3t - 36r^4t + 4st^2 + 4s^2t + 4st^3 + 4s^3t + 7r^3 - 9r^4 - \\
& 36rst^2 - 36rs^2t + 27r^2st - 13rst^3 - 13rs^3t + 20r^3st - 36r^4st - 36rs^2t^2 + 27r^2st^2 + 27r^2s^2t - \\
& 8rs^2t^3 - 8rs^3t^2 + 7r^2st^3 + 7r^2s^3t + 19r^3st^2 + 19r^3s^2t - 13rst + 4r^2s^2t^2)/(5040h^6r^3(r-s)^3(r-t)^3(r-1)^3) + ((x-x_n)^{11}(10r^2s^2 + 3r^2s^3 + 3r^3s^2 + 10r^2t^2 + 3r^2t^3 + 3r^3t^2 + 4s^2t^2 - 2rs - 2rt + \\
& st - 8rs^2 + 10r^2s - 2rs^3 - 2r^3s - 9r^4s - 8rt^2 + 10r^2t - 2rt^3 - 2r^3t - 9r^4t + 4st^2 + 4s^2t + st^3 + \\
& s^3t + 3r^2 + 3r^3 - 9r^4 - 15rst^2 - 15rs^2t + 21r^2st - 2rst^3 - 2rs^3t - 2r^3st - 8rs^2t^2 + 10r^2st^2 + \\
& 10r^2s^2t - 15rst))/((3960h^7r^3(r-s)^3(r-t)^3(r-1)^3) - ((x-x_n)^{13}(2rs + 2rt - st - 3r^2s - 3r^2t - \\
& 3r^2 + 4r^3 + 2rst))/(8580h^9r^3(r-s)^3(r-t)^3(r-1)^3) - (h(x-x_n)^3(1690r^2s^8 - 312r^3s^7 - \\
& 312r^4s^6 - 312r^5s^5 - 312r^6s^4 - 312r^7s^3 - 3887r^8s^2 - 780r^2s^9 - 2002r^3s^8 + 572r^4s^7 + 572r^5s^6 + \\
& 572r^6s^5 + 572r^7s^4 + 572r^8s^3 + 9009r^9s^2 - 385r^2s^{10} + 2020r^3s^9 - 320r^4s^8 - 320r^5s^7 - 320r^6s^6 - \\
& 320r^7s^5 - 320r^8s^4 - 320r^9s^3 - 6235r^{10}s^2 + 210r^2s^{11} - 525r^3s^{10} + 60r^4s^9 + 60r^5s^8 + 60r^6s^7 + \\
& 60r^7s^6 + 60r^8s^5 + 60r^9s^4 + 60r^{10}s^3 + 1425r^{11}s^2 + 1690r^2t^8 - 312r^3t^7 - 312r^4t^6 - 312r^5t^5 - \\
& 312r^6t^4 - 312r^7t^3 - 3887r^8t^2 - 780r^2t^9 - 2002r^3t^8 + 572r^4t^7 + 572r^5t^6 + 572r^6t^5 + 572r^7t^4 + \\
& 572r^8t^3 + 9009r^9t^2 - 385r^2t^{10} + 2020r^3t^9 - 320r^4t^8 - 320r^5t^7 - 320r^6t^6 - 320r^7t^5 - \\
& 320r^8t^4 - 320r^9t^3 - 6235r^{10}t^2 + 210r^2t^{11} - 525r^3t^{10} + 60r^4t^9 + 60r^5t^8 + 60r^6t^7 + 60r^7t^6 + \\
& 60r^8t^5 + 60r^9t^4 + 60r^{10}t^3 + 1425r^{11}t^2 - 884s^2t^8 + 546s^3t^7 + 546s^4t^6 + 546s^5t^5 + 546s^6t^4 + \\
& 546s^7t^3 - 884s^8t^2 + 780s^2t^9 - 364s^3t^8 - 364s^4t^7 - 364s^5t^6 - 364s^6t^5 - 364s^7t^4 - 364s^8t^3 + \\
& 780s^9t^2 - 190s^2t^{10} + 70s^3t^9 + 70s^4t^8 + 70s^5t^7 + 70s^6t^6 + 70s^7t^5 + 70s^8t^4 + 70s^9t^3 - 190s^{10}t^2 - \\
& 520rs^9 + 4550r^9s + 520rs^{10} - 10790r^{10}s - 140rs^{11} + 7870r^{11}s - 1890r^{12}s - 520rt^9 + 4550r^9t + \\
& 520rt^{10} - 10790r^{10}t - 140rt^{11} + 7870r^{11}t - 1890r^{12}t + 260st^9 + 260s^9t - 260st^{10} - 260s^{10}t + \\
& 70st^{11} + 70s^{11}t - 1365r^{10} + 3315r^{11} - 2520r^{12} + 630r^{13} + 650rst^8 + 650rs^8t - 16588r^8st - \\
& 1040rst^9 - 1040rs^9t + 38116r^9st + 635rst^{10} + 635rs^{10}t - 26260r^{10}st - 140rst^{11} - 140rs^{11}t + \\
& 5980r^{11}st + 3224rs^2t^7 - 4641rs^3t^6 - 4641rs^4t^5 - 4641rs^5t^4 - 4641rs^6t^3 + 3224rs^7t^2 - 6292r^2st^7 - \\
& 6292r^2s^7t + 1716r^3st^6 + 1716r^3s^6t + 1716r^4st^5 + 1716r^4s^5t + 1716r^5st^4 + 1716r^5s^4t + 1716r^6st^3 + \\
& 1716r^6s^3t + 16016r^7st^2 + 16016r^7s^2t - 936rs^2t^8 + 1638rs^3t^7 + 1638rs^4t^6 + 1638rs^5t^5 + \\
& 1638rs^6t^4 + 1638rs^7t^3 - 936rs^8t^2 + 3978r^2st^8 + 3978r^2s^8t + 7332r^3st^7 + 7332r^3s^7t - 2964r^4st^6 - \\
& 2964r^4s^6t - 2964r^5st^5 - 2964r^5s^5t - 2964r^6st^4 - 2964r^6s^4t - 2964r^7st^3 - 2964r^7s^3t - 35568r^8st^2 - \\
& 35568r^8s^2t - 925rs^2t^9 + 245rs^3t^8 + 245rs^4t^7 + 245rs^5t^6 + 245rs^6t^5 + 245rs^7t^4 + 245rs^8t^3 - \\
& 925rs^9t^2 - 325r^2st^9 - 325r^2s^9t - 6448r^3st^8 - 6448r^3s^8t + 1508r^4st^7 + 1508r^4s^7t + 1508r^5st^6 + \\
& 1508r^5s^6t + 1508r^6st^5 + 1508r^6s^5t + 1508r^7st^4 + 1508r^7s^4t + 1508r^8st^3 + 1508r^8s^3t + 22646r^9st^2 + \\
& 22646r^9s^2t + 380rs^2t^{10} - 140rs^3t^9 - 140rs^4t^8 - 140rs^5t^7 - 140rs^6t^6 - 140rs^7t^5 - 140rs^8t^4 -
\end{aligned}$$

$$\begin{aligned}
& 140r^9s^9t^3 + 380r^9s^{10}t^2 - 175r^2st^{10} - 175r^2s^{10}t + 1495r^3st^9 + 1495r^3s^9t - 260r^4st^8 - 260r^4s^8t - \\
& 260r^5st^7 - 260r^5s^7t - 260r^6st^6 - 260r^6s^6t - 260r^7st^5 - 260r^7s^5t - 260r^8st^4 - 260r^8s^4t - \\
& 260r^9st^3 - 260r^9s^3t - 4810r^{10}st^2 - 4810r^{10}s^2t + 4147r^2s^2t^6 + 7007r^2s^3t^5 + 7007r^2s^4t^4 + \\
& 7007r^2s^5t^3 + 4147r^2s^6t^2 - 2860r^3s^2t^5 - 2860r^3s^5t^2 - 2860r^4s^2t^4 - 2860r^4s^4t^2 - 2860r^5s^2t^3 - \\
& 2860r^5s^3t^2 - 18590r^6s^2t^2 - 7072r^2s^2t^7 + 3367r^2s^3t^6 + 3367r^2s^4t^5 + 3367r^2s^5t^4 + 3367r^2s^6t^3 - \\
& 7072r^2s^7t^2 - 4433r^3s^2t^6 - 9009r^3s^3t^5 - 9009r^3s^4t^4 - 9009r^3s^5t^3 - 4433r^3s^6t^2 + 4576r^4s^2t^5 + \\
& 4576r^4s^5t^2 + 4576r^5s^2t^4 + 4576r^5s^4t^2 + 4576r^6s^2t^3 + 4576r^6s^3t^2 + 39182r^7s^2t^2 + 4433r^2s^2t^8 - \\
& 3549r^2s^3t^7 - 3549r^2s^4t^6 - 3549r^2s^5t^5 - 3549r^2s^6t^4 - 3549r^2s^7t^3 + 4433r^2s^8t^2 + 2886r^3s^2t^7 + \\
& 4914r^3s^3t^6 + 4914r^3s^4t^5 + 4914r^3s^5t^4 + 4914r^3s^6t^3 + 2886r^3s^7t^2 - 2028r^4s^2t^6 - 2028r^4s^6t^2 - \\
& 2028r^5s^2t^5 - 2028r^5s^5t^2 - 2028r^6s^2t^4 - 2028r^6s^4t^2 - 2028r^7s^2t^3 - 2028r^7s^3t^2 - 21931r^8s^2t^2 - \\
& 955r^2s^2t^9 + 735r^2s^3t^8 + 735r^2s^4t^7 + 735r^2s^5t^6 + 735r^2s^6t^5 + 735r^2s^7t^4 + 735r^2s^8t^3 - 955r^2s^9t^2 - \\
& 507r^3s^2t^8 - 819r^3s^3t^7 - 819r^3s^4t^6 - 819r^3s^5t^5 - 819r^3s^6t^4 - 819r^3s^7t^3 - 507r^3s^8t^2 + 312r^4s^2t^7 + \\
& 312r^4s^7t^2 + 312r^5s^2t^6 + 312r^5s^6t^2 + 312r^6s^2t^5 + 312r^6s^5t^2 + 312r^7s^2t^4 + 312r^7s^4t^2 + 312r^8s^2t^3 + \\
& 312r^8s^3t^2 + 4199r^9s^2t^2)) / ((2162160r^3(r-s)^3(r-t)^3(r-1)^3) - (h^3st(x-x_n)(1690r^2s^7 - \\
& 312r^3s^6 - 312r^4s^5 - 312r^5s^4 - 312r^6s^3 - 3887r^7s^2 - 780r^2s^8 - 2002r^3s^7 + 572r^4s^6 + 572r^5s^5 + \\
& 572r^6s^4 + 572r^7s^3 + 9009r^8s^2 - 385r^2s^9 + 2020r^3s^8 - 320r^4s^7 - 320r^5s^6 - 320r^6s^5 - 320r^7s^4 - \\
& 320r^8s^3 - 6235r^9s^2 + 210r^2s^{10} - 525r^3s^9 + 60r^4s^8 + 60r^5s^7 + 60r^6s^6 + 60r^7s^5 + 60r^8s^4 + 60r^9s^3 + \\
& 1425r^{10}s^2 + 1690r^2t^7 - 312r^3t^6 - 312r^4t^5 - 312r^5t^4 - 312r^6t^3 - 3887r^7t^2 - 780r^2t^8 - 2002r^3t^7 + \\
& 572r^4t^6 + 572r^5t^5 + 572r^6t^4 + 572r^7t^3 + 9009r^8t^2 - 385r^2t^9 + 2020r^3t^8 - 320r^4t^7 - 320r^5t^6 - \\
& 320r^6t^5 - 320r^7t^4 - 320r^8t^3 - 6235r^9t^2 + 210r^2t^{10} - 525r^3t^9 + 60r^4t^8 + 60r^5t^7 + 60r^6t^6 + 60r^7t^5 + \\
& 60r^8t^4 + 60r^9t^3 + 1425r^{10}t^2 - 884s^2t^7 + 546s^3t^6 + 546s^4t^5 + 546s^5t^4 + 546s^6t^3 - 884s^7t^2 + \\
& 780s^2t^8 - 364s^3t^7 - 364s^4t^6 - 364s^5t^5 - 364s^6t^4 - 364s^7t^3 + 780s^8t^2 - 190s^2t^9 + 70s^3t^8 + \\
& 70s^4t^7 + 70s^5t^6 + 70s^6t^5 + 70s^7t^4 + 70s^8t^3 - 190s^9t^2 - 520r^8s + 4550r^8s + 520r^9s - 10790r^9s - \\
& 140rs^{10} + 7870r^{10}s - 1890r^{11}s - 520rt^8 + 4550r^8t + 520rt^9 - 10790r^9t - 140rt^{10} + 7870r^{10}t - \\
& 1890r^{11}t + 260st^8 + 260s^8t - 260st^9 - 260s^9t + 70st^{10} + 70s^{10}t - 1365r^9 + 3315r^{10} - 2520r^{11} + \\
& 630r^{12} + 650rst^7 + 650rs^7t - 16588r^7st - 1040rs^8t - 1040rs^8t + 38116r^8st + 635rst^9 + 635rs^9t - \\
& 26260r^9st - 140rst^{10} - 140rs^{10}t + 5980r^{10}st + 3224rs^2t^6 - 4641rs^3t^5 - 4641rs^4t^4 - 4641rs^5t^3 + \\
& 3224rs^6t^2 - 6292r^2st^6 - 6292r^2s^6t + 1716r^3st^5 + 1716r^3s^5t + 1716r^4st^4 + 1716r^4s^4t + 1716r^5st^3 + \\
& 1716r^5s^3t + 16016r^6st^2 + 16016r^6s^2t - 936rs^2t^7 + 1638rs^3t^6 + 1638rs^4t^5 + 1638rs^5t^4 + \\
& 1638rs^6t^3 - 936rs^7t^2 + 3978r^2st^7 + 3978r^2s^7t + 7332r^3st^6 + 7332r^3s^6t - 2964r^4st^5 - 2964r^4s^5t - \\
& 2964r^5st^4 - 2964r^5s^4t - 2964r^6st^3 - 2964r^6s^3t - 35568r^7s^2t - 35568r^7s^2t - 925rs^2st^8 - 925rs^2st^8 - \\
& 245rs^3t^7 + 245rs^4t^6 + 245rs^5t^5 + 245rs^6t^4 + 245rs^7t^3 - 925rs^8t^2 - 325r^2st^8 - 325r^2st^8 - \\
& 6448r^3st^7 - 6448r^3s^7t + 1508r^4st^6 + 1508r^4s^6t + 1508r^5st^5 + 1508r^5s^5t + 1508r^6st^4 + 1508r^6s^4t + \\
& 1508r^7st^3 + 1508r^7s^3t + 22646r^8st^2 + 22646r^8s^2t + 380rs^2t^9 - 140rs^3t^8 - 140rs^4t^7 - 140rs^5t^6 - \\
& 140rs^6t^5 - 140rs^7t^4 - 140rs^8t^3 + 380rs^9t^2 - 175r^2st^9 - 175r^2s^9t + 1495r^3st^8 + 1495r^3s^8t - \\
& 260r^4st^7 - 260r^4s^7t - 260r^5st^6 - 260r^5s^6t - 260r^6st^5 - 260r^6s^5t - 260r^7st^4 - 260r^7s^4t - \\
& 260r^8st^3 - 260r^8s^3t - 4810r^9st^2 - 4810r^9s^2t + 4147r^2s^2t^5 + 7007r^2s^3t^4 + 7007r^2s^4t^3 + \\
& 4147r^2s^5t^2 - 2860r^3s^2t^4 - 2860r^3s^4t^2 - 2860r^4s^2t^3 - 2860r^4s^3t^2 - 18590r^5s^2t^2 - 7072r^2s^2t^6 + \\
& 3367r^2s^3t^5 + 3367r^2s^4t^4 + 3367r^2s^5t^3 - 7072r^2s^6t^2 - 4433r^3s^2t^5 - 9009r^3s^3t^4 - 9009r^3s^4t^3 - \\
& 4433r^3s^5t^2 + 4576r^4s^2t^4 + 4576r^4s^4t^2 + 4576r^5s^2t^3 + 4576r^5s^3t^2 + 39182r^6s^2t^2 + 4433r^2s^2t^7 - \\
& 3549r^2s^3t^6 - 3549r^2s^4t^5 - 3549r^2s^5t^4 - 3549r^2s^6t^3 + 4433r^2s^7t^2 + 2886r^3s^2t^6 + 4914r^3s^3t^5 + \\
& 4914r^3s^4t^4 + 4914r^3s^5t^3 + 2886r^3s^6t^2 - 2028r^4s^2t^5 - 2028r^4s^5t^2 - 2028r^5s^2t^4 - 2028r^5s^4t^2 - \\
& 2028r^6s^2t^3 - 2028r^6s^3t^2 - 21931r^7s^2t^2 - 955r^2s^2t^8 + 735r^2s^3t^7 + 735r^2s^4t^6 + 735r^2s^5t^5 + \\
& 735r^2s^6t^4 + 735r^2s^7t^3 - 955r^2s^8t^2 - 507r^3s^2t^7 - 819r^3s^3t^6 - 819r^3s^4t^5 - 819r^3s^5t^4 - 819r^3s^6t^3 - \\
& 507r^3s^7t^2 + 312r^4s^2t^6 + 312r^4s^6t^2 + 312r^5s^2t^5 + 312r^5s^5t^2 + 312r^6s^2t^4 + 312r^6s^4t^2 + 312r^7s^2t^3 + \\
& 312r^7s^3t^2 + 4199r^8s^2t^2)) / ((2162160r^2(r-s)^3(r-t)^3(r-1)^3) + (s^2t^2(x-x_n)^6(5rs+5rt- \\
& 3st-7r^2s-7r^2t-7r^2+9r^3+5rst)) / (360h^2r^2(r-s)^3(r-t)^3(r-1)^3) + (st(x-x_n)^7(7r^3s^2- \\
& 5r^2s^2-5r^2t^2+7r^3t^2+s^2t^2+7r^3s-9r^4s+7r^3t-9r^4t+rst^2+rs^2t-7r^2st+17r^3st-9r^4st+ \\
& rs^2t^2-7r^2st^2-7r^2s^2t+7r^3st^2+7r^3s^2t-5r^2s^2t^2)) / (420h^3r^3(r-s)^3(r-t)^3(r-1)^3),
\end{aligned}$$

$$\begin{aligned}
\beta_s = & ((x-x_n)^9(2r^2s^2-10r^2s^3+2r^3s^2+9r^2s^4-7r^3s^3-4r^2t^2-4r^2t^3-4r^3t^2-r^3t^3+2s^2t^2+ \\
& 2s^2t^3-10s^3t^2-7s^3t^3+9s^4t^2-7rs^3+2r^3s+9rs^4-rt^3-r^3t+2st^3-7s^3t+9s^4t+7rst^2- \\
& 2rs^2t+7r^2st+7rst^3-26rs^3t+7r^3st+36rs^4t+3rs^2t^2+12r^2st^2+3r^2s^2t-2rs^2t^3-26rs^3t^2+ \\
& 7r^2st^3-26r^2s^3t+7r^3st^2-2r^3s^2t+9r^3s^4t+2r^3s^3t-7r^3s^2t+3r^2s^2t^2+ \\
& 2r^2s^2t^3-10r^2s^3t^2+2r^3s^2t^2)) / (1512h^5s^3(r-s)^3(s-t)^3(s-1)^3) - ((x-x_n)^8(5r^3s^2-7r^2s^3+
\end{aligned}$$



$$\begin{aligned}
& 13rst + 4r^2s^2t^2)) / (5040h^6s^3(r-s)^3(s-t)^3(s-1)^3) - ((x-x_n)^{11}(10r^2s^2 + 3r^2s^3 + 3r^3s^2 + \\
& 4r^2t^2 + 10s^2t^2 + 3s^2t^3 + 3s^3t^2 - 2rs + rt - 2st + 10rs^2 - 8r^2s - 2rs^3 - 2r^3s - 9rs^4 + 4rt^2 + 4r^2t + \\
& rt^3 + r^3t - 8st^2 + 10s^2t - 2st^3 - 2s^3t - 9s^4t + 3s^2 + 3s^3 - 9s^4 - 15rst^2 + 21rs^2t - 15r^2st - 2rst^3 - \\
& 2rs^3t - 2r^3st + 10rs^2t^2 - 8r^2st^2 + 10r^2s^2t - 15rst)) / (3960h^7s^3(r-s)^3(s-t)^3(s-1)^3) + ((x-x_n)^{13}(2rs - rt + 2st - 3rs^2 - 3s^2t - 3s^2 + 4s^3 + 2rst)) / (8580h^9s^3(r-s)^3(s-t)^3(s-1)^3) + (h(x-x_n)^3(1690r^8s^2 - 312r^3s^7 - 312r^4s^6 - 312r^5s^5 - 312r^6s^4 - 312r^7s^3 - 3887r^2s^8 + 9009r^2s^9 + \\
& 572r^3s^8 + 572r^4s^7 + 572r^5s^6 + 572r^6s^5 + 572r^7s^4 - 2002r^8s^3 - 780r^9s^2 - 6235r^2s^{10} - 320r^3s^9 - \\
& 320r^4s^8 - 320r^5s^7 - 320r^6s^6 - 320r^7s^5 - 320r^8s^4 + 2020r^9s^3 - 385r^{10}s^2 + 1425r^2s^{11} + 60r^3s^{10} + \\
& 60r^4s^9 + 60r^5s^8 + 60r^6s^7 + 60r^7s^6 + 60r^8s^5 + 60r^9s^4 - 525r^{10}s^3 + 210r^{11}s^2 - 884r^2t^8 + 546r^3t^7 + \\
& 546r^4t^6 + 546r^5t^5 + 546r^6t^4 + 546r^7t^3 - 884r^8t^2 + 780r^2t^9 - 364r^3t^8 - 364r^4t^7 - 364r^5t^6 - \\
& 364r^6t^5 - 364r^7t^4 - 364r^8t^3 + 780r^9t^2 - 190r^2t^{10} + 70r^3t^9 + 70r^4t^8 + 70r^5t^7 + 70r^6t^6 + 70r^7t^5 + \\
& 70r^8t^4 + 70r^9t^3 - 190r^{10}t^2 + 1690s^2t^8 - 312s^3t^7 - 312s^4t^6 - 312s^5t^5 - 312s^6t^4 - 312s^7t^3 - \\
& 3887s^8t^2 - 780s^2t^9 - 2002s^3t^8 + 572s^4t^7 + 572s^5t^6 + 572s^6t^5 + 572s^7t^4 + 572s^8t^3 + 9009s^9t^2 - \\
& 385s^2t^{10} + 2020s^3t^9 - 320s^4t^8 - 320s^5t^7 - 320s^6t^6 - 320s^7t^5 - 320s^8t^4 - 320s^9t^3 - 6235s^{10}t^2 + \\
& 210s^2t^{11} - 525s^3t^{10} + 60s^4t^9 + 60s^5t^8 + 60s^6t^7 + 60s^7t^6 + 60s^8t^5 + 60s^9t^4 + 60s^{10}t^3 + 1425s^{11}t^2 + \\
& 4550rs^9 - 520r^9s - 10790rs^{10} + 520r^{10}s + 7870rs^{11} - 140r^{11}s - 1890rs^{12} + 260rt^9 + 260r^9t - \\
& 260rt^{10} - 260r^{10}t + 70rt^{11} + 70r^{11}t - 520st^9 + 4550s^9t + 520st^{10} - 10790s^{10}t - 140st^{11} + \\
& 7870s^{11}t - 1890s^{12}t - 1365s^{10} + 3315s^{11} - 2520s^{12} + 630s^{13} + 650rst^8 - 16588rs^8t + 650r^8st - \\
& 1040rst^9 + 38116rs^9t - 1040r^9st + 635rst^{10} - 26260rs^{10}t + 635r^{10}st - 140rst^{11} + 5980rs^{11}t - \\
& 140r^{11}st - 6292r^2s^2t^7 + 1716rs^3t^6 + 1716rs^4t^5 + 1716rs^5t^4 + 1716rs^6t^3 + 16016rs^7t^2 + 3224r^2s^7t + \\
& 16016r^2s^7t - 4641r^3s^6t + 1716r^3s^6t - 4641r^4s^5t + 1716r^4s^5t - 4641r^5s^4t + 1716r^5s^4t - \\
& 4641r^6s^3t + 1716r^6s^3t + 3224r^7s^2t^2 - 6292r^7s^2t + 3978rs^2t^8 + 7332rs^3t^7 - 2964rs^4t^6 - 2964rs^5t^5 - \\
& 2964rs^6t^4 - 2964rs^7t^3 - 35568rs^8t^2 - 936r^2st^8 - 35568r^2s^8t + 1638r^3st^7 - 2964r^3s^7t + \\
& 1638r^4st^6 - 2964r^4s^6t + 1638r^5st^5 - 2964r^5s^5t + 1638r^6st^4 - 2964r^6s^4t + 1638r^7st^3 + 7332r^7s^3t - \\
& 936r^8st^2 + 3978r^8s^2t - 325rs^2t^9 - 6448rs^3t^8 + 1508rs^4t^7 + 1508rs^5t^6 + 1508rs^6t^5 + 1508rs^7t^4 + \\
& 1508rs^8t^3 + 22646rs^9t^2 - 925r^2st^9 + 22646r^2s^9t + 245r^3st^8 + 1508r^3s^8t + 245r^4st^7 + 1508r^4s^7t + \\
& 245r^5st^6 + 1508r^5s^6t + 245r^6st^5 + 1508r^6s^5t + 245r^7st^4 + 1508r^7s^4t + 245r^8st^3 - 6448r^8s^3t - \\
& 925r^9st^2 - 325r^9s^2t - 175rs^2t^{10} + 1495rs^3t^9 - 260rs^4t^8 - 260rs^5t^7 - 260rs^6t^6 - 260rs^7t^5 - \\
& 260rs^8t^4 - 260rs^9t^3 - 4810rs^{10}t^2 + 380r^2st^{10} - 4810r^2s^{10}t - 140r^3st^9 - 260r^3s^9t - 140r^4st^8 - \\
& 260r^4s^8t - 140r^5st^7 - 260r^5s^7t - 140r^6st^6 - 260r^6s^6t - 140r^7st^5 - 260r^7s^5t - 140r^8st^4 - \\
& 260r^8s^4t - 140r^9st^3 + 1495r^9s^3t + 380r^{10}st^2 - 175r^{10}s^2t + 4147r^2s^2t^6 - 2860r^2s^3t^5 - 2860r^2s^4t^4 - \\
& 2860r^2s^5t^3 - 18590r^2s^6t^2 + 7007r^3s^2t^5 - 2860r^3s^5t^2 + 7007r^4s^2t^4 - 2860r^4s^4t^2 + 7007r^5s^2t^3 - \\
& 2860r^5s^3t^2 + 4147r^6s^2t^2 - 7072r^2s^2t^7 - 4433r^2s^3t^6 + 4576r^2s^4t^5 + 4576r^2s^5t^4 + 4576r^2s^6t^3 + \\
& 39182r^2s^7t^2 + 3367r^3s^2t^6 - 9009r^3s^3t^5 + 4576r^3s^6t^2 + 3367r^4s^2t^5 - 9009r^4s^3t^4 + 4576r^4s^5t^2 + \\
& 3367r^5s^2t^4 - 9009r^5s^3t^3 + 4576r^5s^4t^2 + 3367r^6s^2t^3 - 4433r^6s^3t^2 - 7072r^7s^2t^2 + 4433r^2s^2t^8 + \\
& 2886r^2s^3t^7 - 2028r^2s^4t^6 - 2028r^2s^5t^5 - 2028r^2s^6t^4 - 2028r^2s^7t^3 - 21931r^2s^8t^2 - 3549r^3s^2t^7 + \\
& 4914r^3s^3t^6 - 2028r^3s^7t^2 - 3549r^4s^2t^6 + 4914r^4s^3t^5 - 2028r^4s^6t^2 - 3549r^5s^2t^5 + 4914r^5s^3t^4 - \\
& 2028r^5s^5t^2 - 3549r^6s^2t^4 + 4914r^6s^3t^3 - 2028r^6s^4t^2 - 3549r^7s^2t^3 + 2886r^7s^3t^2 + 4433r^8s^2t^2 - \\
& 955r^2s^2t^9 - 507r^2s^3t^8 + 312r^2s^4t^7 + 312r^2s^5t^6 + 312r^2s^6t^5 + 312r^2s^7t^4 + 312r^2s^8t^3 + 4199r^2s^9t^2 + \\
& 735r^3s^2t^8 - 819r^3s^3t^7 + 312r^3s^8t^2 + 735r^4s^2t^7 - 819r^4s^3t^6 + 312r^4s^7t^2 + 735r^5s^2t^6 - 819r^5s^3t^5 + \\
& 312r^5s^6t^2 + 735r^6s^2t^5 - 819r^6s^3t^4 + 312r^6s^5t^2 + 735r^7s^2t^4 - 819r^7s^3t^3 + 312r^7s^4t^2 + 735r^8s^2t^3 - \\
& 507r^8s^3t^2 - 955r^9s^2t^2)) / (2162160s^3(r-s)^3(s-t)^3(s-1)^3) - (r^2t^2(x-x_n)^6(5rs - 3rt + 5st - \\
& 7rs^2 - 7s^2t - 7s^2 + 9s^3 + 5rst)) / (360h^2s^2(r-s)^3(s-t)^3(s-1)^3) + (h^3rt(x-x_n)(1690r^7s^2 - \\
& 312r^3s^6 - 312r^4s^5 - 312r^5s^4 - 312r^6s^3 - 3887r^2s^7 + 9009r^2s^8 + 572r^3s^7 + 572r^4s^6 + 572r^5s^5 + \\
& 572r^6s^4 - 2002r^7s^3 - 780r^8s^2 - 6235r^2s^9 - 320r^3s^8 - 320r^4s^7 - 320r^5s^6 - 320r^6s^5 - 320r^7s^4 + \\
& 2020r^8s^3 - 385r^9s^2 + 1425r^2s^{10} + 60r^3s^9 + 60r^4s^8 + 60r^5s^7 + 60r^6s^6 + 60r^7s^5 + 60r^8s^4 - \\
& 525r^9s^3 + 210r^{10}s^2 - 884r^2t^7 + 546r^3t^6 + 546r^4t^5 + 546r^5t^4 + 546r^6t^3 - 884r^7t^2 + 780r^2t^8 - \\
& 364r^3t^7 - 364r^4t^6 - 364r^5t^5 - 364r^6t^4 - 364r^7t^3 + 780r^8t^2 - 190r^2t^9 + 70r^3t^8 + 70r^4t^7 + \\
& 70r^5t^6 + 70r^6t^5 + 70r^7t^4 + 70r^8t^3 - 190r^9t^2 + 1690s^2t^7 - 312s^3t^6 - 312s^4t^5 - 312s^5t^4 - 312s^6t^3 - \\
& 3887s^7t^2 - 780s^2t^8 - 2002s^3t^7 + 572s^4t^6 + 572s^5t^5 + 572s^6t^4 + 572s^7t^3 + 9009s^8t^2 - 385s^2t^9 + \\
& 2020s^3t^8 - 320s^4t^7 - 320s^5t^6 - 320s^6t^5 - 320s^7t^4 - 320s^8t^3 - 6235s^9t^2 + 210s^2t^{10} - 525s^3t^9 + \\
& 60s^4t^8 + 60s^5t^7 + 60s^6t^6 + 60s^7t^5 + 60s^8t^4 + 60s^9t^3 + 1425s^{10}t^2 + 4550rs^8 - 520r^8s - 10790rs^9 + \\
& 520r^9s + 7870rs^{10} - 140r^{10}s - 1890rs^{11} + 260rt^8 + 260r^8t - 260rt^9 - 260r^9t + 70rt^{10} + 70r^{10}t - \\
& 520st^8 + 4550s^8t + 520st^9 - 10790s^9t - 140st^{10} + 7870s^{10}t - 1890s^{11}t - 1365s^9 + 3315s^{10} - \\
& 2520s^{11} + 630s^{12} + 650rst^7 - 16588rs^7t + 650r^7st - 1040rst^8 + 38116rs^8t - 1040r^8st + 635rst^9 -
\end{aligned}$$

$$\begin{aligned}
& 26260rs^9t + 635r^9st - 140rst^{10} + 5980rs^{10}t - 140r^{10}st - 6292rs^2t^6 + 1716rs^3t^5 + 1716rs^4t^4 + \\
& 1716rs^5t^3 + 16016rs^6t^2 + 3224r^2st^6 + 16016r^2s^6t - 4641r^3st^5 + 1716r^3s^5t - 4641r^4st^4 + \\
& 1716r^4s^4t - 4641r^5st^3 + 1716r^5s^3t + 3224r^6st^2 - 6292r^6s^2t + 3978rs^2t^7 + 7332rs^3t^6 - 2964rs^4t^5 - \\
& 2964rs^5t^4 - 2964rs^6t^3 - 35568rs^7t^2 - 936r^2st^7 - 35568r^2s^7t + 1638r^3st^6 - 2964r^3s^6t + \\
& 1638r^4st^5 - 2964r^4s^5t + 1638r^5st^4 - 2964r^5s^4t + 1638r^6st^3 + 7332r^6s^3t - 936r^7st^2 + 3978r^7s^2t - \\
& 325r^2t^8 - 6448rs^3t^7 + 1508rs^4t^6 + 1508rs^5t^5 + 1508rs^6t^4 + 1508rs^7t^3 + 22646rs^8t^2 - 925r^2st^8 + \\
& 22646r^2s^8t + 245r^3st^7 + 1508r^3s^7t + 245r^4st^6 + 1508r^4s^6t + 245r^5st^5 + 1508r^5s^5t + 245r^6st^4 + \\
& 1508r^6s^4t + 245r^7st^3 - 6448r^7s^3t - 925r^8st^2 - 325r^8s^2t - 175r^2t^9 + 1495rs^3t^8 - 260rs^4t^7 - \\
& 260rs^5t^6 - 260rs^6t^5 - 260rs^7t^4 - 260rs^8t^3 - 4810rs^9t^2 + 380r^2st^9 - 4810r^2s^9t - 140r^3st^8 - \\
& 260r^3s^8t - 140r^4st^7 - 260r^4s^7t - 140r^5st^6 - 260r^5s^6t - 140r^6st^5 - 260r^6s^5t - 140r^7st^4 - \\
& 260r^7s^4t - 140r^8st^3 + 1495r^8s^3t + 380r^9st^2 - 175r^9s^2t + 4147r^2s^2t^5 - 2860r^2s^3t^4 - 2860r^2s^4t^3 - \\
& 18590r^2s^5t^2 + 7007r^3s^2t^4 - 2860r^3s^4t^2 + 7007r^4s^2t^3 - 2860r^4s^3t^2 + 4147r^5s^2t^2 - 7072r^2s^2t^6 - \\
& 4433r^2s^3t^5 + 4576r^2s^4t^4 + 4576r^2s^5t^3 + 39182r^2s^6t^2 + 3367r^3s^2t^5 - 9009r^3s^3t^4 + 4576r^3s^5t^2 + \\
& 3367r^4s^2t^4 - 9009r^4s^3t^3 + 4576r^4s^4t^2 + 3367r^5s^2t^3 - 4433r^5s^3t^2 - 7072r^6s^2t^2 + 4433r^2s^2t^7 + \\
& 2886r^2s^3t^6 - 2028r^2s^4t^5 - 2028r^2s^5t^4 - 2028r^2s^6t^3 - 21931r^2s^7t^2 - 3549r^3s^2t^6 + 4914r^3s^3t^5 - \\
& 2028r^3s^6t^2 - 3549r^4s^2t^5 + 4914r^4s^3t^4 - 2028r^4s^5t^2 - 3549r^5s^2t^4 + 4914r^5s^3t^3 - 2028r^5s^4t^2 - \\
& 3549r^6s^2t^3 + 2886r^6s^3t^2 + 4433r^7s^2t^2 - 955r^2s^2t^8 - 507r^2s^3t^7 + 312r^2s^4t^6 + 312r^2s^5t^5 + \\
& 312r^2s^6t^4 + 312r^2s^7t^3 + 4199r^2s^8t^2 + 735r^3s^2t^7 - 819r^3s^3t^6 + 312r^3s^7t^2 + 735r^4s^2t^6 - 819r^4s^3t^5 + \\
& 312r^4s^6t^2 + 735r^5s^2t^4 - 819r^5s^3t^4 + 312r^5s^5t^2 + 735r^6s^2t^4 - 819r^6s^3t^3 + 312r^6s^4t^2 + 735r^7s^2t^3 - \\
& 507r^7s^3t^2 - 955r^8s^2t^2)/((2162160s^2(r-s)^3(s-t)^3(s-1)^3) - (rt(x-x_n)^7(7r^2s^3-5r^2s^2+r^2t^2-5s^2t^2+7s^3t^2+7rs^3-9rs^4+7s^3t-9s^4t+rst^2-7rs^2t+r^2st+17rs^3t-9rs^4t-7rs^2t^2+r^2st^2-7r^2s^2t+7rs^3t^2+7r^2s^3t-5r^2s^2t^2))/(420h^3s^3(r-s)^3(s-t)^3(s-1)^3),
\end{aligned}$$

$$\begin{aligned}
\beta_t = & ((x-x_n)^{12}(8rt-12s^2t^2-4rs-12r^2t^2+8st-4rs^2-4r^2s-19rt^2+8r^2t+9rt^3-19st^2+ \\
& 8s^2t+9st^3-12t^2+9t^3+9t^4-19rst^2+8rs^2t+8r^2st+21rst))/((11880h^8t^3(r-t)^3(s-t)^3(t-1)^3) - \\
& (h(x-x_n)^3(546r^3s^7-884r^2s^8+546r^4s^6+546r^5s^5+546r^6s^4+546r^7s^3-884r^8s^2+780r^2s^9- \\
& 364r^3s^8-364r^4s^7-364r^5s^6-364r^6s^5-364r^7s^4-364r^8s^3+780r^9s^2-190r^2s^{10}+70r^3s^9+70r^4s^8+ \\
& 70r^5s^7+70r^6s^6+70r^7s^5+70r^8s^4+70r^9s^3-190r^{10}s^2-3887r^2t^8-312r^3t^7-312r^4t^6-312r^5t^5- \\
& 312r^6t^4-312r^7t^3+1690r^8t^2+9009r^2t^9+572r^3t^8+572r^4t^7+572r^5t^6+572r^6t^5+572r^7t^4-2002r^8t^3- \\
& 780r^9t^2-6235s^2t^{10}-320s^3t^9-320s^4t^8-320s^5t^7-320s^6t^6-320s^7t^5-320s^8t^4+2020s^9t^3-385s^{10}t^2+ \\
& 1425s^2t^{11}+60s^3t^{10}+60s^4t^9+60s^5t^8+60s^6t^7+60s^7t^6+60s^8t^5+60s^9t^4+525s^{10}t^3+210s^{11}t^2+ \\
& 260rs^9+260r^9s-260rs^{10}-260r^{10}s+70rs^{11}+70r^{11}s+4550rt^9-520r^9t-10790rt^{10}+520r^{10}t+7870rt^{11}- \\
& 140r^{11}t-1890rt^{12}+4550st^9-520s^9t-10790st^{10}+520s^{10}t+7870st^{11}-140s^{11}t-1890st^{12}-1365t^{10}+3315t^{11}- \\
& 2520t^{12}+630t^{13}-16588rst^8+650rs^8t+650r^8st+38116rst^9-1040rs^9t-1040r^9st-26260rst^{10}+635rs^{10}t+635r^{10}st+ \\
& 5980rst^{11}-140rs^{11}t-140r^{11}st+16016rs^2t^7+1716rs^3t^6+1716rs^4t^5+1716rs^5t^4+1716rs^6t^3-6292rs^7t^2+ \\
& 16016r^2st^7+3224r^2s^7t+1716r^3st^6-4641r^3s^6t+1716r^4st^5-4641r^4s^5t+1716r^5st^4-4641r^5s^4t+ \\
& 1716r^6st^3-4641r^6s^3t-6292r^7st^2+3224r^7s^2t-35568rs^2t^8-2964rs^3t^7-2964rs^4t^6-2964rs^5t^5- \\
& 2964rs^6t^4+7332rs^7t^3+1638r^3s^7t-2964r^4st^6+1638r^4s^6t-2964r^5st^5+1638r^5s^5t-2964r^6st^4+1638r^6s^4t+ \\
& 7332r^7st^3+1638r^7s^3t+3978r^8st^2-936r^8s^2t+22646rs^2t^9+1508rs^3t^8+1508rs^4t^7+1508rs^5t^6+1508rs^6t^5+ \\
& 1508rs^7t^4-6448rs^8t^3-325rs^9t^2+22646r^2st^9-925r^2s^9t+1508r^3st^8+245r^3s^8t+1508r^4st^7+245r^4s^7t+ \\
& 1508r^5st^6+245r^5s^6t+1508r^6st^5+245r^6s^5t+1508r^7st^4+245r^7s^4t-6448r^8st^3+245r^8s^3t-325r^9st^2- \\
& 925r^9s^2t-4810rs^2t^{10}-260rs^3t^9-260rs^4t^8-260rs^5t^7-260rs^6t^6-260rs^7t^5-260rs^8t^4+1495rs^9t^3- \\
& 175rs^{10}t^2-4810r^2st^{10}+380r^2s^{10}t-260r^3st^9-140r^3s^9t-260r^4st^8-140r^4s^8t-260r^5st^7-140r^5s^7t- \\
& 260r^6st^6-140r^6s^6t-260r^7st^5-140r^7s^5t-260r^8st^4-140r^8s^4t+1495r^9st^3-140r^9s^3t-175r^{10}st^2+380r^{10}s^2t- \\
& 18590r^2s^2t^6-2860r^2s^3t^5-2860r^2s^4t^4-2860r^2s^5t^3+4147r^2s^6t^2-2860r^3s^2t^5+7007r^3s^5t^2-2860r^4s^2t^4+ \\
& 7007r^4s^4t^2-2860r^5s^2t^3+7007r^5s^3t^2+4147r^6s^2t^2+39182r^2s^2t^7+4576r^2s^3t^6+4576r^2s^4t^5+4576r^2s^5t^4- \\
& 4433r^2s^6t^3-7072r^2s^7t^2+4576r^3s^2t^6-9009r^3s^5t^3+3367r^3s^6t^2+4576r^4s^2t^5-9009r^4s^4t^3+3367r^4s^5t^2+ \\
& 4576r^5s^3t^3+3367r^5s^4t^2-4433r^6s^2t^3+
\end{aligned}$$



$$\begin{aligned}
& 3367r^6s^3t^2 - 7072r^7s^2t^2 - 21931r^2s^2t^8 - 2028r^2s^3t^7 - 2028r^2s^4t^6 - 2028r^2s^5t^5 - 2028r^2s^6t^4 + \\
& 2886r^2s^7t^3 + 4433r^2s^8t^2 - 2028r^3s^2t^7 + 4914r^3s^6t^3 - 3549r^3s^7t^2 - 2028r^4s^2t^6 + 4914r^4s^5t^3 - \\
& 3549r^4s^6t^2 - 2028r^5s^2t^5 + 4914r^5s^4t^3 - 3549r^5s^5t^2 - 2028r^6s^2t^4 + 4914r^6s^3t^3 - 3549r^6s^4t^2 + \\
& 2886r^7s^2t^3 - 3549r^7s^3t^2 + 4433r^8s^2t^2 + 4199r^2s^2t^9 + 312r^2s^3t^8 + 312r^2s^4t^7 + 312r^2s^5t^6 + \\
& 312r^2s^6t^5 + 312r^2s^7t^4 - 507r^2s^8t^3 - 955r^2s^9t^2 + 312r^3s^2t^8 - 819r^3s^7t^3 + 735r^3s^8t^2 + 312r^4s^2t^7 - \\
& 819r^4s^6t^3 + 735r^4s^7t^2 + 312r^5s^2t^6 - 819r^5s^5t^3 + 735r^5s^6t^2 + 312r^6s^2t^5 - 819r^6s^4t^3 + 735r^6s^5t^2 + \\
& 312r^7s^2t^4 - 819r^7s^3t^3 + 735r^7s^4t^2 - 507r^8s^2t^3 + 735r^8s^3t^2 - 955r^9s^2t^2) / (2162160t^3(r-t)^3(s-t)^3(t-1)^3) + \\
& ((x-x_n)^8(5r^3t^2 - 4r^3s^2 - 4r^3s^3 - 7r^2t^3 - 4r^2s^3 + 9r^2t^4 - 7r^3t^3 - 7s^2t^3 + 5s^3t^2 + \\
& 9s^2t^4 - 7s^3t^3 - 28rst^3 + 5r^3st + 5r^3st + 36rst^4 + 13rs^2t^2 + 13r^2st^2 + 4r^2s^2t - 47rs^2t^3 + 13rs^3t^2 - \\
& 47r^2st^3 + 4r^2s^3t + 13r^3st^2 + 4r^3s^2t + 36rs^2t^4 - 28rs^3t^3 + 36r^2st^4 - 28r^3st^3 + 5r^3s^3t + 24r^2s^2t^2 - \\
& 47r^2s^2t^3 + 13r^2s^3t^2 + 13r^3s^2t^2 + 9r^2s^2t^4 - 7r^2s^3t^3 - 7r^3s^2t^3 + 5r^3s^3t^2)) / (1680h^4t^3(r-t)^3(s-t)^3(t-1)^3) - \\
& ((x-x_n)^9(2r^2t^2 - 4r^2s^3 - 4r^3s^2 - r^3s^3 - 4r^2s^2 - 10r^2t^3 + 2r^3t^2 + 9r^2t^4 - 7r^3t^3 + 2s^2t^2 - 10s^2t^3 + 2s^3t^2 + 9s^2t^4 - 7s^3t^3 - rs^3 - r^3s - 7rt^3 + 2r^3t + 9rt^4 - 7st^3 + 2s^3t + 9st^4 - 2rst^2 + 7rs^2t + 7r^2st - 26rst^3 + 7rs^3t + 7r^3st + 36rst^4 + 3rs^2t^2 + 3r^2st^2 + 12r^2s^2t - 26rs^2t^3 - 2rs^3t^2 - 26r^2st^3 + 7r^2s^3t - 2r^3st^2 + 7r^3s^2t + 9rs^2t^4 - 7rs^3t^3 + 9r^2st^4 - 7r^3st^3 + 2r^3s^3t + 3r^2s^2t^2 - 10r^2s^2t^3 + 2r^2s^3t^2 + 2r^3s^2t^2)) / (1512h^5t^3(r-t)^3(s-t)^3(t-1)^3) - ((x-x_n)^{10}(16r^2s^2 + 4r^2s^3 + 4r^3s^2 + 4r^2t^2 + 19r^2t^3 + 7r^3t^2 - 9r^2t^4 + 7r^3t^3 + 4s^2t^2 + 19s^2t^3 + 7s^3t^2 - 9s^2t^4 + 7s^3t^3 + 4rs^2 + 4r^2s + 4rs^3 + 4r^3s + 7rt^2 - 8r^2t + 19rt^3 - 8r^3t - 36rt^4 + 7st^2 - 8s^2t + 19st^3 - 8s^3t - 36st^4 + 7t^3 - 9t^4 + 27rst^2 - 36rs^2t - 36r^2st - 20rst^3 - 13rs^3t - 13r^3st - 36rst^4 + 27rs^2t^2 + 27r^2st^2 - 36r^2s^2t + 19rs^2t^3 + 7rs^3t^2 + 19r^2st^3 - 8r^2s^3t + 7r^3st^2 - 8r^3s^2t - 13rst^4 + 4r^2s^2t^2)) / (5040h^6t^3(r-t)^3(s-t)^3(t-1)^3) + (h^2(x-x_n)^2(260r^2s^9 - 884r^3s^8 + 546r^4s^7 + 546r^5s^6 + 546r^6s^5 + 546r^7s^4 - 884r^8s^3 + 260r^9s^2 - 260r^2s^{10} + 780r^3s^9 - 364r^4s^8 - 364r^5s^7 - 364r^6s^6 - 364r^7s^5 - 364r^8s^4 + 780r^9s^3 - 260r^{10}s^2 + 70r^2s^{11} - 190r^3s^{10} + 70r^4s^9 + 70r^5s^8 + 70r^6s^7 + 70r^7s^6 + 70r^8s^5 + 70r^9s^4 - 190r^{10}s^3 + 70r^{11}s^2 + 4550r^2t^9 - 3887r^3t^8 - 312r^4t^7 - 312r^5t^6 - 312r^6t^5 - 312r^7t^4 + 1690r^8t^3 - 520r^9t^2 - 10790r^2t^{10} + 9009r^3t^9 + 572r^4t^8 + 572r^5t^7 + 572r^6t^6 + 572r^7t^5 - 2002r^8t^4 - 780r^9t^3 + 520r^{10}t^2 + 7870r^2t^{11} - 6235r^3t^{10} - 320r^4t^9 - 320r^5t^8 - 320r^6t^7 - 320r^7t^6 - 320r^8t^5 + 2020s^9t^4 - 385s^{10}t^3 - 140r^{11}t^2 - 1890r^2t^{12} + 1425r^3t^{11} + 60r^4t^{10} + 60r^5t^9 + 60r^6t^8 + 60r^7t^7 + 60s^8t^6 + 60s^9t^5 - 525s^{10}t^4 + 210s^{11}t^3 - 1365rt^{10} + 3315rt^{11} - 2520rt^{12} + 630rt^{13} - 1365st^{10} + 3315st^{11} - 2520st^{12} + 630st^{13} + 9100rst^9 - 260rs^9t - 260r^9st - 21580rst^{10} + 260rs^{10}t + 260r^{10}st + 15740rst^{11} - 70rs^{11}t - 70r^{11}st - 3780rst^{12} - 20475rs^2t^8 + 15704rs^3t^7 + 1404rs^4t^6 + 1404rs^5t^5 + 1404rs^6t^4 - 6604rs^7t^3 + 2340rs^8t^2 - 20475r^2st^8 - 234r^2s^8t + 15704r^3st^7 + 3770r^3s^7t + 1404r^4st^6 - 4095r^4s^6t + 1404r^5st^5 - 4095r^5s^5t + 1404r^6st^4 - 4095r^6s^4t - 6604r^7st^3 + 3770r^7s^3t + 2340r^8st^2 - 234r^8s^2t + 47125r^2st^9 - 34996r^3st^8 - 2392r^4st^7 - 2392r^5st^6 - 2392r^6st^5 + 7904r^7st^4 + 1976r^8st^3 - 1820r^9st^2 + 47125r^2st^9 - 260r^2s^9t - 34996r^3st^8 - 1300r^3s^8t - 2392r^4st^7 + 1274r^4s^7t - 2392r^5st^6 + 1274r^5s^6t - 2392r^6st^5 + 1274r^6s^5t + 7904r^7st^4 + 1274r^7s^4t + 1976r^8st^3 - 1300r^8s^3t - 1820r^9st^2 - 260r^9s^2t - 32495r^2st^{10} + 22326rs^3t^9 + 1188rs^4t^8 + 1188rs^5t^7 + 1188rs^6t^6 + 1188rs^7t^5 - 6768rs^8t^4 + 1695rs^9t^3 + 250rs^{10}t^2 - 32495r^2st^{10} + 445r^2s^{10}t + 22326r^3st^9 - 855r^3s^9t + 1188r^4st^8 + 315r^4s^8t + 1188r^5st^7 + 315r^5s^7t + 1188r^6st^6 + 315r^6s^6t + 1188r^7st^5 + 315r^7s^5t - 6768r^8st^4 + 315r^8s^4t + 1695r^9st^3 - 855r^9s^3t + 250r^{10}st^2 + 445r^{10}s^2t + 7405rs^2t^{11} - 4750rs^3t^{10} - 200rs^4t^9 - 200rs^5t^8 - 200rs^6t^7 - 200rs^7t^6 - 200rs^8t^5 + 1555rs^9t^4 - 700rs^{10}t^3 + 70rs^{11}t^2 + 7405r^2st^{11} - 140r^2s^{11}t - 4750r^3st^{10} + 380r^3s^{10}t - 200r^4st^9 - 140r^4s^9t - 200r^5st^8 - 140r^5s^8t - 200r^6st^7 - 140r^6s^7t - 200r^7st^6 - 140r^7s^6t - 200r^8st^5 - 140r^8s^5t + 1555r^9st^4 - 140r^9s^4t - 700r^{10}st^3 + 380r^{10}s^3t + 70r^{11}st^2 - 140r^{11}s^2t + 32032r^2s^2t^7 - 16874r^2s^3t^6 - 1144r^2s^4t^5 - 1144r^2s^5t^4 + 5863r^2s^6t^3 - 3068r^2s^7t^2 - 16874r^3s^2t^6 - 5720r^3s^3t^5 - 2860r^3s^4t^4 + 4147r^3s^5t^3 - 494r^3s^6t^2 - 1144r^4s^2t^5 - 2860r^4s^3t^4 + 7007r^4s^4t^3 + 2366r^4s^5t^2 - 1144r^5s^2t^4 + 4147r^5s^3t^3 + 2366r^5s^4t^2 + 5863r^6s^2t^3 - 494r^6s^3t^2 - 3068r^7s^2t^2 - 71136r^2s^2t^8 + 36218r^2s^3t^7 + 1612r^2s^4t^6 + 1612r^2s^5t^5 - 7397r^2s^6t^4 + 260r^2s^7t^3 + 3042r^2s^8t^2 + 36218r^3s^2t^7 + 9152r^3s^3t^6 + 4576r^3s^4t^5 - 4433r^3s^5t^4 - 1066r^3s^6t^3 - 5434r^3s^7t^2 + 1612r^4s^2t^6 + 4576r^4s^3t^5 - 9009r^4s^4t^4 - 5642r^4s^5t^3 + 5005r^4s^6t^2 + 1612r^5s^2t^5 - 4433r^5s^3t^4 - 5642r^5s^4t^3 + 5005r^5s^5t^2 - 7397r^5s^6t^2 - 1066r^6s^3t^3 + 5005r^6s^4t^2 + 260r^7s^2t^3 - 5434r^7s^3t^2 + 3042r^8s^2t^2 + 45292r^2s^2t^9 - 20423r^2s^3t^8 -
\end{aligned}$$

$$\begin{aligned}
& 520r^2s^4t^7 - 520r^2s^5t^6 - 520r^2s^6t^5 + 4394r^2s^7t^4 - 2015r^2s^8t^3 - 1250r^2s^9t^2 - 20423r^3s^2t^8 - \\
& 4056r^3s^3t^7 - 2028r^3s^4t^6 - 2028r^3s^5t^5 + 2886r^3s^6t^4 - 663r^3s^7t^3 + 4678r^3s^8t^2 - 520r^4s^2t^7 - \\
& 2028r^4s^3t^6 + 4914r^4s^4t^5 + 1365r^4s^5t^4 - 3304r^4s^6t^3 - 520r^5s^2t^6 - 2028r^5s^3t^5 + 4914r^5s^4t^4 + \\
& 1365r^5s^5t^3 - 3304r^5s^6t^2 - 520r^6s^2t^5 + 2886r^6s^3t^4 + 1365r^6s^4t^3 - 3304r^6s^5t^2 + 4394r^7s^2t^4 - \\
& 663r^7s^3t^3 - 3304r^7s^4t^2 - 2015r^8s^2t^3 + 4678r^8s^3t^2 - 1250r^9s^2t^2 - 9620r^2s^2t^{10} + 3939r^2s^3t^9 + \\
& 52r^2s^4t^8 + 52r^2s^5t^7 + 52r^2s^6t^6 + 52r^2s^7t^5 - 767r^2s^8t^4 + 540r^2s^9t^3 + 205r^2s^{10}t^2 + 3939r^3s^2t^9 + \\
& 624r^3s^3t^8 + 312r^3s^4t^7 + 312r^3s^5t^6 + 312r^3s^6t^5 - 507r^3s^7t^4 + 228r^3s^8t^3 - 1095r^3s^9t^2 + 52r^4s^2t^8 + \\
& 312r^4s^3t^7 - 819r^4s^4t^6 - 84r^4s^5t^5 + 595r^4s^6t^4 + 52r^5s^2t^7 + 312r^5s^3t^6 - 819r^5s^4t^5 - 84r^5s^5t^4 + \\
& 595r^5s^6t^3 + 52r^6s^2t^6 + 312r^6s^3t^5 - 819r^6s^4t^4 - 84r^6s^5t^3 + 595r^6s^6t^2 + 52r^7s^2t^5 - 507r^7s^3t^4 - \\
& 84r^7s^4t^3 + 595r^7s^5t^2 - 767r^8s^2t^4 + 228r^8s^3t^3 + 595r^8s^4t^2 + 540r^9s^2t^3 - 1095r^9s^3t^2 + 205r^{10}s^2t^2) \\
& / ((2162160t^3(r-t)^3(s-t)^3(t-1)^3) + ((x-x_n)^{13}(rs-2rt-2st+3rt^2+3st^2+3t^2-4t^3- \\
& 2rst))/(8580h^9t^3(r-t)^3(s-t)^3(t-1)^3) + ((x-x_n)^{11}(4r^2s^2+10r^2t^2+3r^2t^3+3r^3t^2+ \\
& 10s^2t^2+3s^2t^3+3s^3t^2+rs-2rt-2st+4rs^2+4r^2s+rs^3+r^3s+10rt^2-8r^2t-2rt^3- \\
& 2r^3t-9rt^4+10st^2-8s^2t-2st^3-2s^3t-9st^4+3t^2+3t^3-9t^4+21rst^2-15rs^2t-15r^2st- \\
& 2rst^3-2rs^3t-2r^3st+10rs^2t^2+10r^2st^2-8r^2s^2t-15rst)) / (3960h^7t^3(r-t)^3(s-t)^3(t- \\
& 1)^3) - (r^2s^2(x-x_n)^6(3rs-5rt-5st+7rt^2+7st^2+7t^2-9t^3-5rst)) / (360h^2t^2(r-t)^3(s- \\
& t)^3(t-1)^3) - (h^3rs(x-x_n)(546r^3s^6-884r^2s^7+546r^4s^5+546r^5s^4+546r^6s^3-884r^7s^2+ \\
& 780r^2s^8-364r^3s^7-364r^4s^6-364r^5s^5-364r^6s^4-364r^7s^3+780r^8s^2-190r^2s^9+70r^3s^8+ \\
& 70r^4s^7+70r^5s^6+70r^6s^5+70r^7s^4+70r^8s^3-190r^9s^2-3887r^2t^7-312r^3t^6-312r^4t^5- \\
& 312r^5t^4-312r^6t^3+1690r^7t^2+9009r^2t^8+572r^3t^7+572r^4t^6+572r^5t^5+572r^6t^4-2002r^7t^3- \\
& 780r^8t^2-6235r^2t^9-320r^3t^8-320r^4t^7-320r^5t^6-320r^6t^5-320r^7t^4+2020r^8t^3-385r^9t^2+ \\
& 1425r^2t^{10}+60r^3t^9+60r^4t^8+60r^5t^7+60r^6t^6+60r^7t^5+60r^8t^4-525r^9t^3+210r^{10}t^2-3887s^2t^7- \\
& 312s^3t^6-312s^4t^5-312s^5t^4-312s^6t^3+1690s^7t^2+9009s^2t^8+572s^3t^7+572s^4t^6+572s^5t^5+ \\
& 572s^6t^4-2002s^7t^3-780s^8t^2-6235s^2t^9-320s^3t^8-320s^4t^7-320s^5t^6-320s^6t^5-320s^7t^4+ \\
& 2020s^8t^3-385s^9t^2+1425s^2t^{10}+60s^3t^9+60s^4t^8+60s^5t^7+60s^6t^6+60s^7t^5+60s^8t^4- \\
& 525s^9t^3+210s^{10}t^2+260rs^8+260r^8s-260rs^9-260r^9s+70rs^{10}+70r^{10}s+4550rt^8- \\
& 520r^8t-10790rt^9+520r^9t+7870rt^{10}-140r^{10}t-1890rt^{11}+4550st^8-520s^8t-10790st^9+ \\
& 520s^9t+7870st^{10}-140s^{10}t-1890st^{11}-1365t^9+3315t^{10}-2520t^{11}+630t^{12}-16588rst^7+ \\
& 650rs^7t+650r^7st+38116rst^8-1040rs^8t-1040r^8st-26260rst^9+635rs^9t+635r^9st+ \\
& 5980rst^{10}-140rs^{10}t-140r^{10}st+16016rs^2t^6+1716r^3s^3t^5+1716r^4s^4t^4+1716r^5s^5t^3-6292r^6s^6t^2+ \\
& 16016r^2s^2t^6+3224r^2s^6t+1716r^3s^5t+1716r^4s^4t+1716r^5s^3t+1716r^6s^2t^5- \\
& 4641r^5s^3t-6292r^6s^2t+3224r^6s^2t-35568rs^2t^7-2964r^3s^3t^6-2964r^4s^4t^5-2964r^5s^5t^4+ \\
& 7332r^6s^6t^3+3978rs^7t^2-35568r^2st^7-936r^2s^7t-2964r^3st^6+1638r^3s^6t-2964r^4st^5+1638r^4s^5t- \\
& 2964r^5st^4+1638r^5s^4t+7332r^6st^3+1638r^6s^3t+3978r^7st^2-936r^7s^2t+22646rs^2t^8+1508rs^3t^7+ \\
& 1508rs^4t^6+1508rs^5t^5+1508rs^6t^4-6448rs^7t^3-325rs^8t^2+22646r^2st^8-925r^2s^8t+1508r^3st^7+ \\
& 245r^3s^7t+1508r^4st^6+245r^4s^6t+1508r^5st^5+245r^5s^5t+1508r^6st^4+245r^6s^4t-6448r^7st^3+ \\
& 245r^7s^3t-325r^8st^2-925r^8s^2t-4810rs^2t^9-260r^3s^3t^8-260r^4s^4t^7-260r^5s^5t^6-260r^6s^6t^5- \\
& 260r^7s^7t^4+1495rs^8t^3-175rs^9t^2-4810r^2st^9+380r^2s^9t-260r^3st^8-140r^3s^8t-260r^4st^7- \\
& 140r^4s^7t-260r^5st^6-140r^5s^6t-260r^6st^5-140r^6s^5t-260r^7st^4-140r^7s^4t+1495r^8st^3- \\
& 140r^8s^3t-175r^9st^2+380r^9s^2t-18590r^2s^2t^5-2860r^2s^3t^4-2860r^2s^4t^3+4147r^2s^5t^2- \\
& 2860r^3s^2t^4+7007r^3s^4t^2-2860r^4s^2t^3+7007r^4s^3t^2+4147r^5s^2t^2+39182r^2s^2t^6+4576r^2s^3t^5+ \\
& 4576r^2s^4t^4-4433r^2s^5t^3-7072r^2s^6t^2+4576r^3s^2t^5-9009r^3s^4t^3+3367r^3s^5t^2+4576r^4s^2t^4- \\
& 9009r^4s^3t^3+3367r^4s^4t^2-4433r^5s^2t^3+3367r^5s^3t^2-7072r^6s^2t^2-21931r^2s^2t^7-2028r^2s^3t^6- \\
& 2028r^2s^4t^5-2028r^2s^5t^4+2886r^2s^6t^3+4433r^2s^7t^2-2028r^3s^2t^6+4914r^3s^5t^3-3549r^3s^6t^2- \\
& 2028r^4s^2t^5+4914r^4s^4t^3-3549r^4s^5t^2-2028r^5s^2t^4+4914r^5s^3t^3-3549r^5s^4t^2+2886r^6s^2t^3- \\
& 3549r^6s^3t^2+4433r^7s^2t^2+4199r^2s^2t^8+312r^2s^3t^7+312r^2s^4t^6+312r^2s^5t^5+312r^2s^6t^4- \\
& 507r^2s^7t^3-955r^2s^8t^2+312r^3s^2t^7-819r^3s^6t^3+735r^3s^7t^2+312r^4s^2t^6-819r^4s^5t^3+735r^4s^6t^2+ \\
& 312r^5s^2t^5-819r^5s^4t^3+735r^5s^5t^2+312r^6s^2t^4-819r^6s^3t^3+735r^6s^4t^2-507r^7s^2t^3+735r^7s^3t^2- \\
& 955r^8s^2t^2)) / ((2162160t^3(r-t)^3(s-t)^3(t-1)^3) + (rs(x-x_n)^7(r^2s^2-5r^2t^2+7r^2t^3-5s^2t^2+ \\
& 7s^2t^3+7rt^3-9rt^4+7st^3-9st^4-7rst^2+rs^2t+r^2st+17rst^3-9rst^4-7rs^2t^2-7r^2st^2+ \\
& r^2s^2t+7rs^2t^3+7r^2st^3-5r^2s^2t^2)) / (420h^3t^3(r-t)^3(s-t)^3(t-1)^3),
\end{aligned}$$

$$\begin{aligned}
\beta_1 = & (h(x-x_n)^3(819r^2s^7+819r^3s^6+819r^4s^5+819r^5s^4+819r^6s^3+819r^7s^2+448r^2s^8- \\
& 1554r^3s^7-1554r^4s^6-1554r^5s^5-1554r^6s^4-1554r^7s^3+448r^8s^2-1335r^2s^9+875r^3s^8+ \\
& 875r^4s^7+875r^5s^6+875r^6s^5+875r^7s^4+875r^8s^3-1335r^9s^2+380r^2s^{10}-140r^3s^9-140r^4s^8-
\end{aligned}$$

$$\begin{aligned}
& 140r^5s^7 - 140r^6s^6 - 140r^7s^5 - 140r^8s^4 - 140r^9s^3 + 380r^{10}s^2 + 819r^{11}s + 819r^{12}t^7 + 819r^{13}t^6 + 819r^{14}t^5 + \\
& 819r^{15}t^4 + 819r^{16}t^3 + 819r^{17}t^2 + 448r^{18}t - 1554r^{19}t^7 - 1554r^{20}t^6 - 1554r^{21}t^5 - 1554r^{22}t^4 - 1554r^{23}t^3 + \\
& 448r^{24}t^2 - 1335r^{25}t^9 + 875r^{26}t^8 + 875r^{27}t^7 + 875r^{28}t^6 + 875r^{29}t^5 + 875r^{30}t^4 + 875r^{31}t^3 - 1335r^{32}t^2 + \\
& 380r^{33}t^{10} - 140r^{34}t^9 - 140r^{35}t^8 - 140r^{36}t^7 - 140r^{37}t^6 - 140r^{38}t^5 - 140r^{39}t^4 + 380r^{40}t^3 + 819r^{41}t^2 + \\
& 819r^{42}t + 819r^{43}t^6 + 819r^{44}t^5 + 819r^{45}t^4 + 819r^{46}t^3 + 819r^{47}t^2 + 448r^{48}t - 1554r^{49}t^7 - 1554r^{50}t^6 - \\
& 1554r^{51}t^5 - 1554r^{52}t^4 - 1554r^{53}t^3 + 448r^{54}t^2 - 1335r^{55}t^9 + 875r^{56}t^8 + 875r^{57}t^7 + 875r^{58}t^6 + 875r^{59}t^5 + \\
& 875r^{60}t^4 + 875r^{61}t^3 - 1335r^{62}t^2 + 380r^{63}t^{10} - 140r^{64}t^9 - 140r^{65}t^8 - 140r^{66}t^7 - 140r^{67}t^6 - 140r^{68}t^5 - \\
& 140r^{69}t^4 - 140r^{70}t^3 + 380r^{71}t^2 - 1755r^{72}t - 1755r^{73}t^6 + 1670r^{74}t^5 + 1670r^{75}t^4 - 35r^{76}t^3 - 35r^{77}t^2 - 35r^{78}t - \\
& 140r^{79}t^{11} - 140r^{80}t^{10} - 140r^{81}t^9 - 140r^{82}t^8 - 140r^{83}t^7 - 140r^{84}t^6 - 140r^{85}t^5 - 140r^{86}t^4 - 140r^{87}t^3 - \\
& 1755st^8 - 1755st^7 + 1670st^6 + 1670st^5 - 35st^4 - 35st^3 - 140st^2 - 140st - 585r^9 - 735r^{10} + \\
& 210r^{11} + 585r^9 - 735r^{10} + 210r^{11} + 585r^9 - 735r^{10} + 210r^{11} + 6201rst^7 + 6201rs^7t + 6201r^7st - \\
& 4453rst^8 - 4453rs^8t - 4453r^8st - 995rst^9 - 995rs^9t - 995r^9st + 425rst^{10} + 425rs^{10}t + 425r^{10}st + \\
& 70rst^{11} + 70rs^{11}t + 70r^{11}st - 4095rs^2t^6 - 4095rs^3t^5 - 4095rs^4t^4 - 4095rs^5t^3 - 4095rs^6t^2 - \\
& 4095r^2st^6 - 4095r^3st^5 - 4095r^4st^4 - 4095r^5st^3 - 4095r^6st^2 - 4095r^7st - 1099rs^2t^7 + 6909rs^3t^6 + 6909rs^4t^5 + 6909rs^5t^4 + 6909rs^6t^3 - \\
& 1099rs^7t^2 - 1099r^2st^7 + 6909r^3st^6 + 6909r^4st^5 + 6909r^5st^4 + 6909r^6st^3 + 6909r^7st^2 - 1099r^8st - 1099r^9st^2 - 1099r^{10}st^3 - \\
& 1099r^{11}st^4 + 4023r^2st^8 - 2919r^3st^7 - 2919r^4st^6 - 2919r^5st^5 - 2919r^6st^4 - 2919r^7st^3 - 2919r^8st^2 - 2919r^9st - 2919r^{10}st^2 - \\
& 2919r^{11}st^3 + 4023r^2st^8 - 2919r^3st^7 - 2919r^4st^6 - 2919r^5st^5 - 2919r^6st^4 - 2919r^7st^3 - 2919r^8st^2 - 2919r^9st - 2919r^{10}st^2 - \\
& 2919r^{11}st^3 + 355rs^2t^9 + 355rs^3t^8 + 355rs^4t^7 + 355rs^5t^6 + 355rs^6t^5 + 355rs^7t^4 + 355rs^8t^3 - 355rs^9t^2 - \\
& 355r^2st^9 - 355r^3st^8 + 355r^4st^7 + 355r^5st^6 + 355r^6st^5 + 355r^7st^4 + 355r^8st^3 - 355r^9st^2 - 190rs^2t^{10} + 70rs^3t^9 + \\
& 70rs^4t^8 + 70rs^5t^7 + 70rs^6t^6 + 70rs^7t^5 + 70rs^8t^4 + 70rs^9t^3 - 190rs^{10}t^2 - 190r^2st^{10} - 190r^3st^9 - 190r^4st^8 - \\
& 190r^5st^7 - 190r^6st^6 - 190r^7st^5 - 190r^8st^4 - 190r^9st^3 - 190r^{10}st^2 - 190r^{11}st - 4914r^2s^2t^5 + 4914r^3s^2t^4 + 4914r^4s^2t^3 + \\
& 4914r^5s^2t^2 + 4914r^6s^2t - 1540r^7s^2t^6 - 5467r^2s^3t^5 - 5467r^3s^3t^4 - 5467r^4s^3t^3 - 5467r^5s^3t^2 - 5467r^6s^3t - 5467r^7s^3t^2 - \\
& 5467r^8s^3t - 5467r^9s^3t^2 - 5467r^{10}s^3t - 5467r^{11}s^3t^2 - 1190r^2s^4t^5 - 1190r^3s^4t^4 - 1190r^4s^4t^3 - 1190r^5s^4t^2 - 1190r^6s^4t - \\
& 1190r^7s^4t^2 - 1190r^8s^4t - 1190r^9s^4t^2 - 1190r^{10}s^4t - 1190r^{11}s^4t^2 - 10458r^2s^5t^6 - 10458r^3s^5t^5 - 10458r^4s^5t^4 - 10458r^5s^5t^3 - \\
& 10458r^6s^5t^2 - 10458r^7s^5t - 10458r^8s^5t^2 - 10458r^9s^5t - 10458r^{10}s^5t^2 - 10458r^{11}s^5t - 2037r^2s^6t^7 + 2037r^3s^6t^6 + 2037r^4s^6t^5 + \\
& 2037r^5s^6t^4 + 2037r^6s^6t^3 + 2037r^7s^6t^2 + 2037r^8s^6t - 3150r^2s^7t^8 - 3150r^3s^7t^7 - 3150r^4s^7t^6 - 3150r^5s^7t^5 - 3150r^6s^7t^4 - \\
& 3150r^7s^7t^3 - 3150r^8s^7t^2 - 3150r^9s^7t - 3150r^{10}s^7t^2 - 3150r^{11}s^7t - 2071r^2s^8t^9 - 2071r^3s^8t^8 - 2071r^4s^8t^7 - 2071r^5s^8t^6 - \\
& 2071r^6s^8t^5 - 2071r^7s^8t^4 - 2071r^8s^8t^3 - 2071r^9s^8t^2 - 2071r^{10}s^8t - 2071r^{11}s^8t^2 - 590r^2s^9t^{10} - 590r^3s^9t^9 - 590r^4s^9t^8 - 590r^5s^9t^7 - \\
& 590r^6s^9t^6 - 590r^7s^9t^5 - 590r^8s^9t^4 - 590r^9s^9t^3 - 590r^{10}s^9t^2 - 590r^{11}s^9t - 294r^2s^{10}t^{11} - 294r^3s^{10}t^{10} - 294r^4s^{10}t^9 - 294r^5s^{10}t^8 - \\
& 294r^6s^{10}t^7 - 294r^7s^{10}t^6 - 294r^8s^{10}t^5 - 294r^9s^{10}t^4 - 294r^{10}s^{10}t^3 - 294r^{11}s^{10}t^2 - 294r^{12}s^{10}t - 294r^{13}s^{10}t^2 - 590r^9s^{11}t^2) \\
& /((2162160(r-1)^3(s-1)^3(t-1)^3) - ((x-x_n)^{11}(10rs^2-9s-9t-8r^2s^2-8r^2t^2-8s^2t^2-2rs- \\
& 2rt-2st-9r+10r^2s-2rs^3-2r^3s+10rt^2+10r^2t-2rt^3-2r^3t+10st^2+10s^2t-2st^3-2s^3t+ \\
& 3r^2+3r^3+3s^2+3s^3+3t^2+3t^3-15rst^2-15rs^2t-15r^2st+rst^3+rs^3t+r^3st+4rs^2t^2+4r^2st^2+ \\
& 4r^2s^2t+21rst)) / (3960h^7(r-1)^3(s-1)^3(t-1)^3) + (h^2(x-x_n)^2(1755r^2s^8-819r^3s^7-819r^4s^6- \\
& 819r^5s^5-819r^6s^4-819r^7s^3+1755r^8s^2-1670r^9s-448r^3s^8+1554r^4s^7+1554r^5s^6+1554r^6s^5+ \\
& 1554r^7s^4-448r^8s^3-1670r^9s^2+35r^2s^{10}+1335r^3s^9-875r^4s^8-875r^5s^7-875r^6s^6-875r^7s^5- \\
& 875r^8s^4+1335r^9s^3+35r^{10}s^2+140r^{11}s-380r^3s^{10}+140r^4s^9+140r^5s^8+140r^6s^7+140r^7s^6+ \\
& 140r^8s^5+140r^9s^4-380r^{10}s^3+140r^{11}s^2+1755r^{12}t^8-819r^{13}t^7-819r^{14}t^6-819r^{15}t^5-819r^{16}t^4- \\
& 819r^{17}t^3+1755r^{18}t^2-1670r^{19}t-448r^{20}t^8+1554r^{21}t^7+1554r^{22}t^6+1554r^{23}t^5+1554r^{24}t^4-448r^{25}t^3- \\
& 1670r^{26}t^2+35r^{27}t^{10}+1335r^{28}t^9-875r^{29}t^8-875r^{30}t^7-875r^{31}t^6-875r^{32}t^5-875r^{33}t^4+1335r^{34}t^3+ \\
& 35r^{35}t^2+140r^{36}t^{11}-380r^{37}t^{10}+140r^{38}t^9+140r^{39}t^8+140r^{40}t^7+140r^{41}t^6+140r^{42}t^5+140r^{43}t^4- \\
& 380r^{44}t^3+140r^{45}t^2+1755r^{46}t-819r^{47}t^8-819r^{48}t^7-819r^{49}t^6-819r^{50}t^5-819r^{51}t^4-819r^{52}t^3+1755r^{53}t^2- \\
& 1670r^{54}t-448r^{55}t^8+1554r^{56}t^7+1554r^{57}t^6+1554r^{58}t^5+1554r^{59}t^4-448r^{60}t^3-1670r^{61}t^2+35r^{62}t^{10}+ \\
& 1335r^{63}t^9-875r^{64}t^8-875r^{65}t^7-875r^{66}t^6-875r^{67}t^5-875r^{68}t^4+1335r^{69}t^3+35r^{70}t^2+140r^{71}t^{11}- \\
& 380r^{72}t^{10}+140r^{73}t^9+140r^{74}t^8+140r^{75}t^7+140r^{76}t^6+140r^{77}t^5+140r^{78}t^4+140r^{79}t^3+140r^{80}t^2-
\end{aligned}$$

$$\begin{aligned}
& 585rs^9 - 585r^9s + 735rs^{10} + 735r^{10}s - 210rs^{11} - 210r^{11}s - 585rt^9 - 585r^9t + 735rt^{10} + 735r^{10}t - \\
& 210rt^{11} - 210r^{11}t - 585st^9 - 585s^9t + 735st^{10} + 735s^{10}t - 210st^{11} - 210s^{11}t + 3510rst^8 + \\
& 3510r^8st + 3510r^8st - 3340rst^9 - 3340rs^9t - 3340r^9st + 70rst^{10} + 70rs^{10}t + 70r^{10}st + 280rst^{11} + \\
& 280rs^{11}t + 280r^{11}st - 7020rs^2t^7 + 3276rs^3t^6 + 3276rs^4t^5 + 3276rs^5t^4 + 3276rs^6t^3 - 7020rs^7t^2 - \\
& 7020r^2st^7 - 7020r^2s^7t + 3276r^3st^6 + 3276r^3s^6t + 3276r^4st^5 + 3276r^4s^5t + 3276r^5st^4 + 3276r^5s^4t + \\
& 3276r^6st^3 + 3276r^6s^3t - 7020r^7st^2 - 7020r^7s^2t + 4005r^2st^8 + 2653rs^3t^7 - 5355rs^4t^6 - 5355rs^5t^5 - \\
& 5355rs^6t^4 + 2653rs^7t^3 + 4005rs^8t^2 + 4005r^2st^8 + 4005r^2s^8t + 2653r^3st^7 + 2653r^3s^7t - 5355r^4st^6 - \\
& 5355r^4s^6t - 5355r^5st^5 - 5355r^5s^5t - 5355r^6st^4 - 5355r^6s^4t + 2653r^7st^3 + 2653r^7s^3t + 4005r^8st^2 + \\
& 4005r^8s^2t + 2330rs^2t^9 - 4898rs^3t^8 + 2044rs^4t^7 + 2044rs^5t^6 + 2044rs^6t^5 + 2044rs^7t^4 - 4898rs^8t^3 + \\
& 2330rs^9t^2 + 2330r^2st^9 + 2330r^2s^9t - 4898r^3st^8 - 4898r^3s^8t + 2044r^4st^7 + 2044r^4s^7t + 2044r^5st^6 + \\
& 2044r^5s^6t + 2044r^6st^5 + 2044r^6s^5t + 2044r^7st^4 + 2044r^7s^4t - 4898r^8st^3 - 4898r^8s^3t + 2330r^9st^2 + \\
& 2330r^9s^2t - 805rs^2t^{10} + 495rs^3t^9 + 105rs^4t^8 + 105rs^5t^7 + 105rs^6t^6 + 105rs^7t^5 + 105rs^8t^4 + \\
& 495rs^9t^3 - 805rs^{10}t^2 - 805r^2st^{10} - 805r^2s^{10}t + 495r^3st^9 + 495r^3s^9t + 105r^4st^8 + 105r^4s^8t + \\
& 105r^5st^7 + 105r^5s^7t + 105r^6st^6 + 105r^6s^6t + 105r^7st^5 + 105r^7s^5t + 105r^8st^4 + 105r^8s^4t + \\
& 495r^9st^3 + 495r^9s^3t - 805r^{10}st^2 - 805r^{10}s^2t - 70rs^2t^{11} + 190rs^3t^{10} - 70rs^4t^9 - 70rs^5t^8 - \\
& 70rs^6t^7 - 70rs^7t^6 - 70rs^8t^5 - 70rs^9t^4 + 190rs^{10}t^3 - 70rs^{11}t^2 - 70r^2st^{11} - 70r^2s^{11}t + 190r^3st^{10} + \\
& 190r^3s^{10}t - 70r^4st^9 - 70r^4s^9t - 70r^5st^8 - 70r^5s^8t - 70r^6st^7 - 70r^6s^7t - 70r^7st^6 - 70r^7s^6t - \\
& 70r^8st^5 - 70r^8s^5t - 70r^9st^4 - 70r^9s^4t + 190r^{10}st^3 + 190r^{10}s^3t - 70r^{11}st^2 - 70r^{11}s^2t + \\
& 8190r^2s^2t^6 - 819r^2s^3t^5 - 819r^2s^4t^4 - 819r^2s^5t^3 + 8190r^2s^6t^2 - 819r^3s^2t^5 - 9828r^3s^3t^4 - \\
& 9828r^3s^4t^3 - 819r^3s^5t^2 - 819r^4s^2t^4 - 9828r^4s^3t^3 - 819r^4s^4t^2 - 819r^5s^2t^3 - 819r^5s^3t^2 + \\
& 8190r^6s^2t^2 + 2198r^2s^2t^7 - 8449r^2s^3t^6 - 1442r^2s^4t^5 - 1442r^2s^5t^4 - 8449r^2s^6t^3 + 2198r^2s^7t^2 - \\
& 8449r^3s^2t^6 + 10934r^3s^3t^5 + 17941r^3s^4t^4 + 10934r^3s^5t^3 - 8449r^3s^6t^2 - 1442r^4s^2t^5 + 17941r^4s^3t^4 + \\
& 17941r^4s^4t^3 - 1442r^4s^5t^2 - 1442r^5s^2t^4 + 10934r^5s^3t^3 - 1442r^5s^4t^2 - 8449r^6s^2t^3 - 8449r^6s^3t^2 + \\
& 2198r^7s^2t^2 - 8046r^2s^2t^8 + 5032r^2s^3t^7 + 4109r^2s^4t^6 + 4109r^2s^5t^5 + 4109r^2s^6t^4 + 5032r^2s^7t^3 - \\
& 8046r^2s^8t^2 + 5032r^3s^2t^7 + 2380r^3s^3t^6 - 9268r^3s^4t^5 - 9268r^3s^5t^4 + 2380r^3s^6t^3 + 5032r^3s^7t^2 + \\
& 4109r^4s^2t^6 - 9268r^4s^3t^5 - 20916r^4s^4t^4 - 9268r^4s^5t^3 + 4109r^4s^6t^2 + 4109r^5s^2t^5 - 9268r^5s^3t^4 - \\
& 9268r^5s^4t^3 + 4109r^5s^5t^2 + 4109r^6s^2t^4 + 2380r^6s^3t^3 + 4109r^6s^4t^2 + 5032r^7s^2t^3 + 5032r^7s^3t^2 - \\
& 8046r^8s^2t^2 + 710r^2s^2t^9 + 2036r^2s^3t^8 - 2072r^2s^4t^7 - 2072r^2s^5t^6 - 2072r^2s^6t^5 - 2072r^2s^7t^4 + \\
& 2036r^2s^8t^3 + 710r^2s^9t^2 + 2036r^3s^2t^8 - 4074r^3s^3t^7 + 1113r^3s^4t^6 + 1113r^3s^5t^5 + 1113r^3s^6t^4 - \\
& 4074r^3s^7t^3 + 2036r^3s^8t^2 - 2072r^4s^2t^7 + 1113r^4s^3t^6 + 6300r^4s^4t^5 + 6300r^4s^5t^4 + 1113r^4s^6t^3 - \\
& 2072r^4s^7t^2 - 2072r^5s^2t^6 + 1113r^5s^3t^5 + 6300r^5s^4t^4 + 1113r^5s^5t^3 - 2072r^5s^6t^2 - 2072r^6s^2t^5 + \\
& 1113r^6s^3t^4 + 1113r^6s^4t^3 - 2072r^6s^5t^2 - 2072r^7s^2t^4 - 4074r^7s^3t^3 - 2072r^7s^4t^2 + 2036r^8s^2t^3 + \\
& 2036r^8s^3t^2 + 710r^9s^2t^2 + 380r^2s^2t^{10} - 660r^2s^3t^9 + 224r^2s^4t^8 + 224r^2s^5t^7 + 224r^2s^6t^6 + \\
& 224r^2s^7t^5 + 224r^2s^8t^4 - 660r^2s^9t^3 + 380r^2s^{10}t^2 - 660r^3s^2t^9 + 588r^3s^3t^8 + 42r^3s^4t^7 + 42r^3s^5t^6 + \\
& 42r^3s^6t^5 + 42r^3s^7t^4 + 588r^3s^8t^3 - 660r^3s^9t^2 + 224r^4s^2t^8 + 42r^4s^3t^7 - 504r^4s^4t^6 - 504r^4s^5t^5 - \\
& 504r^4s^6t^4 + 42r^4s^7t^3 + 224r^4s^8t^2 + 224r^5s^2t^7 + 42r^5s^3t^6 - 504r^5s^4t^5 - 504r^5s^5t^4 + 42r^5s^6t^3 + \\
& 224r^5s^7t^2 + 224r^6s^2t^6 + 42r^6s^3t^5 - 504r^6s^4t^4 + 42r^6s^5t^3 + 224r^6s^6t^2 + 224r^7s^2t^5 + 42r^7s^3t^4 + \\
& 42r^7s^4t^3 + 224r^7s^5t^2 + 224r^8s^2t^4 + 588r^8s^3t^3 + 224r^8s^4t^2 - 660r^9s^2t^3 - 660r^9s^3t^2 + 380r^{10}s^2t^2) \\
& / (2162160(r-1)^3(s-1)^3(t-1)^3 - ((x-x_n)^{13}(3r+3s+3t-2rs-2rt-2st+rst-4)) / (8580h^9(r-1)^3(s-1)^3(t-1)^3) + \\
& ((x-x_n)^9(2r^2s^3-10r^2s^2+2r^3s^2+2r^3s^3-10r^2t^2+2r^2t^3+2r^3t^2+2r^3t^3-10s^2t^2+2s^2t^3+2s^3t^2+2s^3t^3+9rs^2+9r^2s-7rs^3-7r^3s+9rt^2+9r^2t-7rt^3-7r^3t+ \\
& 9st^2+9s^2t-7st^3-7s^3t-26rst^2-26rs^2t-26r^2st-2rst^3-2rs^3t-2r^3st+3rs^2t^2+3r^2st^2+3r^2s^2t+7rs^2t^3+7rs^3t^2+7r^2st^3+7r^2s^3t+7r^3st^2+7r^3s^2t-rs^3t^3-r^3st^3-r^3s^3t+36rst+ \\
& 12r^2s^2t^2-4r^2s^2t^3-4r^2s^3t^2-4r^3s^2t^2)) / (1512h^5(r-1)^3(s-1)^3(t-1)^3) + ((x-x_n)^{10}(4r^2s^2-8r^2s^3-8r^3s^2+4r^2t^2-8r^2t^3-8r^3t^2+4s^2t^2-8s^2t^3-8s^3t^2-36rs-36rt-36st+19rs^2+ \\
& 19r^2s+7rs^3+7r^3s+19rt^2+19r^2t+7rt^3+7r^3t+19st^2+19s^2t+7st^3+7s^3t-9r^2+7r^3-9s^2+7s^3-9t^2+7t^3+27rst^2+27rs^2t+27r^2st-13rst^3-13rs^3t-13r^3st-36rs^2t^2-36r^2st^2- \\
& 36r^2s^2t+4rs^2t^3+4rs^3t^2+4r^2st^3+4r^2s^3t+4r^3st^2+4r^3s^2t+20rst+16r^2s^2t^2)) / (5040h^6(r-1)^3(s-1)^3(t-1)^3) - ((x-x_n)^8(9r^2s^2-7r^2s^3-7r^3s^2+5r^3s^3+9r^2t^2-7r^2t^3-7r^3t^2+5r^3t^3+ \\
& 9s^2t^2-7s^2t^3-7s^3t^2+5s^3t^3+36rst^2+36rs^2t+36r^2st-28rst^3-28rs^3t-28r^3st-47rs^2t^2-47r^2st^2-47r^2s^2t+13rs^3t^2+13rs^3t^2+13r^2st^3+13r^2s^3t+13r^3st^2+13r^3s^2t+5rs^3t^3+5r^3st^3+ \\
& 5r^3s^3t+24r^2s^2t^2+4r^2s^2t^3+4r^2s^3t^2+4r^3s^2t^2-4r^2s^3t^3-4r^3s^2t^3-4r^3s^3t^2)) / (1680h^4(r-1)^3(s-1)^3(t-1)^3) - ((x-x_n)^{12}(9r+9s+9t-19rs-19rt-19st+8rs^2+8r^2s+8rt^2+8r^2t+ \\
& 8st^2+8s^2t-12r^2-12s^2-12t^2-4rst^2-4rs^2t-4r^2st+21rst+9)) / (11880h^8(r-1)^3(s-1)^3(t-1)^3) + (h^3rst(x-x_n)(819r^2s^6+819r^3s^5+819r^4s^4+819r^5s^3+819r^6s^2+448r^2s^7-
\end{aligned}$$



$$\begin{aligned}
& 910rs^2t^6 - 1729rs^2t^5 + 295rst^8 - 1378rst^7 + 1846rst^6 - 95rt^9 + 390rt^8 - 442rt^7 + 35s^{10} - 95s^9t - \\
& 130s^9 + 35s^8t^2 + 390s^8t + 130s^8 + 35s^7t^3 - 182s^7t^2 - 442s^7t + 35s^6t^4 - 182s^6t^3 + 273s^6t^2 + 35s^5t^5 - \\
& 182s^5t^4 + 273s^5t^3 + 35s^4t^6 - 182s^4t^5 + 273s^4t^4 + 35s^3t^7 - 182s^3t^6 + 273s^3t^5 + 35s^2t^8 - 182s^2t^7 + \\
& 273s^2t^6 - 95st^9 + 390st^8 - 442st^7 + 35t^{10} - 130t^9 + 130t^8) / (2162160r^2s^2t^2) + ((x-x_n)^9(r^2s^2 + \\
& 4r^2st + 4r^2s + r^2t^2 + 4r^2t + r^2 + 4rs^2t + 4rs^2 + 4rst^2 + 16rst + 4rs + 4rt^2 + 4rt + s^2t^2 + 4s^2t + s^2 + \\
& 4st^2 + 4st + t^2)) / (3024h^4r^2s^2t^2) - ((x-x_n)^{10}(r^2s + r^2t + r^2 + rs^2 + 4rst + 4rs + rt^2 + 4rt + r + s^2t + \\
& s^2 + st^2 + 4st + s + t^2 + t)) / (2520h^5r^2s^2t^2) - (h^3(x-x_n)^2(95r^9s^2 - 35r^{10}t - 35r^{10}s + 190r^9st + \\
& 130r^9s + 95r^9t^2 + 130r^9t - 35r^8s^3 - 330r^8s^2t - 390r^8s^2 - 330r^8st - 130r^8s - 35r^8t^3 - \\
& 390r^8t^2 - 130r^8t - 35r^7s^4 + 112r^7s^3t + 182r^7s^3 + 294r^7s^2t^2 + 1560r^7s^2t + 442r^7s^2 + 112r^7st^3 + \\
& 1560r^7st^2 + 884r^7st - 35r^7t^4 + 182r^7t^3 + 442r^7t^2 - 35r^6s^5 + 112r^6s^4t + 182r^6s^4 + 21r^6s^3t^2 - \\
& 728r^6s^3t - 273r^6s^3 + 21r^6s^2t^3 - 1820r^6s^2t^2 - 2119r^6s^2t + 112r^6st^4 - 728r^6st^3 - 2119r^6st^2 - \\
& 35r^6t^5 + 182r^6t^4 - 273r^6t^3 - 35r^5s^6 + 112r^5s^5t + 182r^5s^5 + 21r^5s^4t^2 - 728r^5s^4t - 273r^5s^4 - \\
& 252r^5s^3t^3 + 182r^5s^3t^2 + 1456r^5s^3t + 21r^5s^2t^4 + 182r^5s^2t^3 + 3458r^5s^2t^2 + 112r^5st^5 - 728r^5st^4 + \\
& 1456r^5st^3 - 35r^5t^6 + 182r^5t^5 - 273r^5t^4 - 35r^4s^7 + 112r^4s^6t + 182r^4s^6 + 21r^4s^5t^2 - 728r^4s^5t - \\
& 273r^4s^5 - 252r^4s^4t^3 + 182r^4s^4t^2 + 1456r^4s^4t - 252r^4s^3t^4 + 2184r^4s^3t^3 - 1547r^4s^3t^2 + 21r^4s^2t^5 + \\
& 182r^4s^2t^4 - 1547r^4s^2t^3 + 112r^4st^6 - 728r^4st^5 + 1456r^4st^4 - 35r^4t^7 + 182r^4t^6 - 273r^4t^5 - 35r^3s^8 + \\
& 112r^3s^7t + 182r^3s^7 + 21r^3s^6t^2 - 728r^3s^6t - 273r^3s^6 - 252r^3s^5t^3 + 182r^3s^5t^2 + 1456r^3s^5t - \\
& 252r^3s^4t^4 + 2184r^3s^4t^3 - 1547r^3s^4t^2 - 252r^3s^3t^5 + 2184r^3s^3t^4 - 6552r^3s^3t^3 + 21r^3s^2t^6 + \\
& 182r^3s^2t^5 - 1547r^3s^2t^4 + 112r^3st^7 - 728r^3st^6 + 1456r^3st^5 - 35r^3t^8 + 182r^3t^7 - 273r^3t^6 + 95r^2s^9 - \\
& 390r^2s^8t - 390r^2s^8 + 294r^2s^7t^2 + 1560r^2s^7t + 442r^2s^7 + 21r^2s^6t^3 - 1820r^2s^6t^2 - 2119r^2s^6t + \\
& 21r^2s^5t^4 + 182r^2s^5t^3 + 3458r^2s^5t^2 + 21r^2s^4t^5 + 182r^2s^4t^4 - 1547r^2s^4t^3 + 21r^2s^3t^6 + 182r^2s^3t^5 - \\
& 1547r^2s^3t^4 + 294r^2s^2t^7 - 1820r^2s^2t^6 + 3458r^2s^2t^5 - 330r^2st^8 + 1560r^2st^7 - 2119r^2st^6 + 95r^2t^9 - \\
& 390r^2t^8 + 442r^2t^7 - 35rs^{10} + 190rs^9t + 130rs^9 - 330rs^8t^2 - 780rs^8t - 130rs^8 + 112rs^7t^3 + \\
& 1560rs^7t^2 + 884rs^7t + 112rs^6t^4 - 728rs^6t^3 - 2119rs^6t^2 + 112rs^5t^5 - 728rs^5t^4 + 1456rs^5t^3 + \\
& 112rs^4t^6 - 728rs^4t^5 + 1456rs^4t^4 + 112rs^3t^7 - 728rs^3t^6 + 1456rs^3t^5 - 330rs^2t^8 + 1560rs^2t^7 - \\
& 2119rs^2t^6 + 190rst^9 - 780rst^8 + 884rst^7 - 35rt^{10} + 130rt^9 - 130rt^8 - 35s^{10}t + 95s^9t^2 + 130s^9t - \\
& 35s^8t^3 - 390s^8t^2 - 130s^8t - 35s^7t^4 + 182s^7t^3 + 442s^7t^2 - 35s^6t^5 + 182s^6t^4 - 273s^6t^3 - 35s^5t^6 + \\
& 182s^5t^5 - 273s^5t^4 - 35s^4t^7 + 182s^4t^6 - 273s^4t^5 - 35s^3t^8 + 182s^3t^7 - 273s^3t^6 + 95s^2t^9 - 390s^2t^8 + \\
& 442s^2t^7 - 35st^{10} + 130st^9 - 130st^8) / (2162160r^2s^2t^2) - (h^4(x-x_n)(35r^9 - 95r^8s - 95r^8t - \\
& 130r^8 + 35r^7s^2 + 295r^7st + 390r^7s + 35r^7t^2 + 390r^7t + 130r^7 + 35r^6s^3 - 147r^6s^2t - 182r^6s^2 - \\
& 147r^6st^2 - 1378r^6st - 442r^6s + 35r^6t^3 - 182r^6t^2 - 442r^6t + 35r^5s^4 - 147r^5s^3t - 182r^5s^3 + \\
& 126r^5s^2t^2 + 910r^5s^2t + 273r^5s^2 - 147r^5st^3 + 910r^5st^2 + 1846r^5st + 35r^5t^4 - 182r^5t^3 + 273r^5t^2 + \\
& 35r^4s^5 - 147r^4s^4t - 182r^4s^4 + 126r^4s^3t^2 + 910r^4s^3t + 273r^4s^3 + 126r^4s^2t^3 - 1092r^4s^2t^2 - \\
& 1729r^4s^2t - 147r^4st^4 + 910r^4st^3 - 1729r^4st^2 + 35r^4t^5 - 182r^4t^4 + 273r^4t^3 + 35r^3s^6 - 147r^3s^5t - \\
& 182r^3s^5 + 126r^3s^4t^2 + 910r^3s^4t + 273r^3s^4 + 126r^3s^3t^3 - 1092r^3s^3t^2 - 1729r^3s^3t + 126r^3s^2t^4 - \\
& 1092r^3s^2t^3 + 3276r^3s^2t^2 - 147r^3st^5 + 910r^3st^4 - 1729r^3st^3 + 35r^3t^6 - 182r^3t^5 + 273r^3t^4 + \\
& 35r^2s^7 - 147r^2s^6t - 182r^2s^6 + 126r^2s^5t^2 + 910r^2s^5t + 273r^2s^5 + 126r^2s^4t^3 - 1092r^2s^4t^2 - \\
& 1729r^2s^4t + 126r^2s^3t^4 - 1092r^2s^3t^3 + 3276r^2s^3t^2 + 126r^2s^2t^5 - 1092r^2s^2t^4 + 3276r^2s^2t^3 - \\
& 147r^2st^6 + 910r^2st^5 - 1729r^2st^4 + 35r^2t^7 - 182r^2t^6 + 273r^2t^5 - 95rs^8 + 295rs^7t + 390rs^7 - \\
& 147rs^6t^2 - 1378rs^6t - 442rs^6 - 147rs^5t^3 + 910rs^5t^2 + 1846rs^5t - 147rs^4t^4 + 910rs^4t^3 - \\
& 1729rs^4t^2 - 147rs^3t^5 + 910rs^3t^4 - 1729rs^3t^3 - 147rs^2t^6 + 910rs^2t^5 - 1729rs^2t^4 + 295rst^7 - \\
& 1378rst^6 + 1846rst^5 - 95rt^8 + 390rt^7 - 442rt^6 + 35s^9 - 95s^8t - 130s^8 + 35s^7t^2 + 390s^7t + \\
& 130s^7 + 35s^6t^3 - 182s^6t^2 - 442s^6t + 35s^5t^4 - 182s^5t^3 + 273s^5t^2 + 35s^4t^5 - 182s^4t^4 + 273s^4t^3 + \\
& 35s^3t^6 - 182s^3t^5 + 273s^3t^4 + 35s^2t^7 - 182s^2t^6 + 273s^2t^5 - 95st^8 + 390st^7 - 442st^6 + 35t^9 - \\
& 130t^8 + 130t^7) / (2162160rst) - ((x-x_n)^8(r^2s^2t + r^2s^2 + r^2st^2 + 4r^2st + r^2s + r^2t^2 + r^2t + \\
& rs^2t^2 + 4rs^2t + rs^2 + 4rst^2 + 4rst + rt^2 + s^2t^2 + s^2t + st^2)) / (840h^3r^2s^2t^2) - ((x-x_n)^{12}(r + \\
& s + t + 1)) / (5940h^7r^2s^2t^2) - ((x-x_n)^6(rs + rt + st + rst)) / (180hrst) + ((x-x_n)^7(r^2s^2t^2 + \\
& 4r^2s^2t + r^2s^2 + 4r^2st^2 + 4r^2st + r^2t^2 + 4rs^2t^2 + 4rs^2t + 4rst^2 + s^2t^2)) / (840h^2r^2s^2t^2) + ((x-x_n)^{11}(r^2 + 4rs + 4rt + 4r + s^2 + 4st + 4s + t^2 + 4t + 1)) / (7920h^6r^2s^2t^2),
\end{aligned}$$

$$\begin{aligned}
\gamma_r = & (x-x_n)^{13} / (17160h^8r^2(r-s)^2(r-t)^2(r-1)^2) - ((x-x_n)^{10}(r+2s+2t+4rs+4rt+8st + \\
& rs^2+rt^2+2st^2+2s^2t+2s^2+2t^2+4rst)) / (5040h^5r^2(r-s)^2(r-t)^2(r-1)^2) + ((x-x_n)^{11}(2r + \\
& 4s+4t+2rs+2rt+4st+s^2+t^2+1)) / (7920h^6r^2(r-s)^2(r-t)^2(r-1)^2) + ((x-x_n)^9(s^2t^2+2rs + \\
& 2rt+4st+2rs^2+2rt^2+4st^2+4s^2t+s^2+t^2+2rst^2+2rs^2t+8rst)) / (3024h^4r^2(r-s)^2(r-t)^2(r- \\
& 1)^2) - ((x-x_n)^8(2s^2t^2+rs^2+rt^2+2st^2+2s^2t+4rst^2+4rs^2t+rs^2t^2+4rst)) / (1680h^3r^2(r-
\end{aligned}$$

$$\begin{aligned}
& s)^2(r-t)^2(r-1)^2) + (h^2(x-x_n)^3(56r^{10} - 126r^9s - 126r^9t - 182r^9 + 30r^8s^2 + 316r^8st + 442r^8s + \\
& 30r^8t^2 + 442r^8t + 156r^8 + 30r^7s^3 - 100r^7s^2t - 130r^7s^2 - 100r^7st^2 - 1222r^7st - 416r^7s + \\
& 30r^7t^3 - 130r^7t^2 - 416r^7t + 30r^6s^4 - 100r^6s^3t - 130r^6s^3 + 56r^6s^2t^2 + 494r^6s^2t + 156r^6s^2 - \\
& 100r^6st^3 + 494r^6st^2 + 1300r^6st + 30r^6t^4 - 130r^6t^3 + 156r^6t^2 + 30r^5s^5 - 100r^5s^4t - 130r^5s^4 + \\
& 56r^5s^3t^2 + 494r^5s^3t + 156r^5s^3 + 56r^5s^2t^3 - 364r^5s^2t^2 - 702r^5s^2t - 100r^5st^4 + 494r^5st^3 - \\
& 702r^5st^2 + 30r^5t^5 - 130r^5t^4 + 156r^5t^3 + 30r^4s^6 - 100r^4s^5t - 130r^4s^5 + 56r^4s^4t^2 + 494r^4s^4t + \\
& 156r^4s^4 + 56r^4s^3t^3 - 364r^4s^3t^2 - 702r^4s^3t + 56r^4s^2t^4 - 364r^4s^2t^3 + 728r^4s^2t^2 - 100r^4st^5 + \\
& 494r^4st^4 - 702r^4st^3 + 30r^4t^6 - 130r^4t^5 + 156r^4t^4 + 30r^3s^7 - 100r^3s^6t - 130r^3s^6 + 56r^3s^5t^2 + \\
& 494r^3s^5t + 156r^3s^5 + 56r^3s^4t^3 - 364r^3s^4t^2 - 702r^3s^4t + 56r^3s^3t^4 - 364r^3s^3t^3 + 728r^3s^3t^2 + \\
& 56r^3s^2t^5 - 364r^3s^2t^4 + 728r^3s^2t^3 - 100r^3st^6 + 494r^3st^5 - 702r^3st^4 + 30r^3t^7 - 130r^3t^6 + 156r^3t^5 + \\
& 30r^2s^8 - 100r^2s^7t - 130r^2s^7 + 56r^2s^6t^2 + 494r^2s^6t + 156r^2s^6 + 56r^2s^5t^3 - 364r^2s^5t^2 - 702r^2s^5t + \\
& 56r^2s^4t^4 - 364r^2s^4t^3 + 728r^2s^4t^2 + 56r^2s^3t^5 - 364r^2s^3t^4 + 728r^2s^3t^3 + 56r^2s^2t^6 - 364r^2s^2t^5 + \\
& 728r^2s^2t^4 - 100r^2st^7 + 494r^2st^6 - 702r^2st^5 + 30r^2t^8 - 130r^2t^7 + 156r^2t^6 + 30rs^9 - 100rs^8t - \\
& 130rs^8 + 56rs^7t^2 + 494rs^7t + 156rs^7 + 56rs^6t^3 - 364rs^6t^2 - 702rs^6t + 56rs^5t^4 - 364rs^5t^3 + \\
& 728rs^5t^2 + 56rs^4t^5 - 364rs^4t^4 + 728rs^4t^3 + 56rs^3t^6 - 364rs^3t^5 + 728rs^3t^4 + 56rs^2t^7 - 364rs^2t^6 + \\
& 728rs^2t^5 - 100rst^8 + 494rst^7 - 702rst^6 + 30rt^9 - 130rt^8 + 156rt^7 - 35s^{10} + 95s^9t + 130s^9 - \\
& 35s^8t^2 - 390s^8t - 130s^8 - 35s^7t^3 + 182s^7t^2 + 442s^7t - 35s^6t^4 + 182s^6t^3 - 273s^6t^2 - 35s^5t^5 + \\
& 182s^5t^4 - 273s^5t^3 - 35s^4t^6 + 182s^4t^5 - 273s^4t^4 - 35s^3t^7 + 182s^3t^6 - 273s^3t^5 - 35s^2t^8 + 182s^2t^7 - \\
& 273s^2t^6 + 95st^9 - 390st^8 + 442st^7 - 35t^{10} + 130t^9 - 130t^8) / (2162160r^2(r-s)^2(r-t)^2(r-1)^2) - \\
& ((x-x_n)^{12}(r+2s+2t+2)) / (11880h^7r^2(r-s)^2(r-t)^2(r-1)^2) - (h^3(x-x_n)^2(56r^{10}s + 56r^{10}t - \\
& 126r^9s^2 - 252r^9st - 182r^9s - 126r^9t^2 - 182r^9t + 30r^8s^3 + 346r^8s^2t + 442r^8s^2 + 346r^8st^2 + \\
& 884r^8st + 156r^8s + 30r^8t^3 + 442r^8t^2 + 156r^8t + 30r^7s^4 - 70r^7s^3t - 130r^7s^3 - 200r^7s^2t^2 - \\
& 1352r^7s^2t - 416r^7s^2 - 70r^7st^3 - 1352r^7st^2 - 832r^7st + 30r^7t^4 - 130r^7t^3 - 416r^7t^2 + 30r^6s^5 - \\
& 70r^6s^4t - 130r^6s^4 - 44r^6s^3t^2 + 364r^6s^3t + 156r^6s^3 - 44r^6s^2t^3 + 988r^6s^2t^2 + 1456r^6s^2t - \\
& 70r^6st^4 + 364r^6st^3 + 1456r^6st^2 + 30r^6t^5 - 130r^6t^4 + 156r^6t^3 + 30r^5s^6 - 70r^5s^5t - 130r^5s^5 - \\
& 44r^5s^4t^2 + 364r^5s^4t + 156r^5s^4 + 112r^5s^3t^3 + 130r^5s^3t^2 - 546r^5s^3t - 44r^5s^2t^4 + 130r^5s^2t^3 - \\
& 1404r^5s^2t^2 - 70r^5s^5 + 364r^5st^4 - 546r^5st^3 + 30r^5t^6 - 130r^5t^5 + 156r^5t^4 + 30r^4s^7 - 70r^4s^6t - \\
& 130r^4s^6 - 44r^4s^5t^2 + 364r^4s^5t + 156r^4s^5 + 112r^4s^4t^3 + 130r^4s^4t^2 - 546r^4s^4t + 112r^4s^3t^4 - \\
& 728r^4s^3t^3 + 26r^4s^3t^2 - 44r^4s^2t^5 + 130r^4s^2t^4 + 26r^4s^2t^3 - 70r^4st^6 + 364r^4st^5 - 546r^4st^4 + \\
& 30r^4t^7 - 130r^4t^6 + 156r^4t^5 + 30r^3s^8 - 70r^3s^7t - 130r^3s^7 - 44r^3s^6t^2 + 364r^3s^6t + 156r^3s^6 + \\
& 112r^3s^5t^3 + 130r^3s^5t^2 - 546r^3s^5t + 112r^3s^4t^4 - 728r^3s^4t^3 + 26r^3s^4t^2 + 112r^3s^3t^5 - 728r^3s^3t^4 + \\
& 1456r^3s^3t^3 - 44r^3s^2t^6 + 130r^3s^2t^5 + 26r^3s^2t^4 - 70r^3st^7 + 364r^3st^6 - 546r^3st^5 + 30r^3t^8 - \\
& 130r^3t^7 + 156r^3t^6 + 30r^2s^9 - 70r^2s^8t - 130r^2s^8 - 44r^2s^7t^2 + 364r^2s^7t + 156r^2s^7 + 112r^2s^6t^3 + \\
& 130r^2s^6t^2 - 546r^2s^6t + 112r^2s^5t^4 - 728r^2s^5t^3 + 26r^2s^5t^2 + 112r^2s^4t^5 - 728r^2s^4t^4 + 1456r^2s^4t^3 + \\
& 112r^2s^3t^6 - 728r^2s^3t^5 + 1456r^2s^3t^4 - 44r^2s^2t^7 + 130r^2s^2t^6 + 26r^2s^2t^5 - 70r^2st^8 + 364r^2st^7 - \\
& 546r^2st^6 + 30r^2t^9 - 130r^2t^8 + 156r^2t^7 - 35rs^{10} + 125rs^9t + 130rs^9 - 135rs^8t^2 - 520rs^8t - \\
& 130rs^8 + 21rs^7t^3 + 676rs^7t^2 + 598rs^7t + 21rs^6t^4 - 182rs^6t^3 - 975rs^6t^2 + 21rs^5t^5 - 182rs^5t^4 + \\
& 455rs^5t^3 + 21rs^4t^6 - 182rs^4t^5 + 455rs^4t^4 + 21rs^3t^7 - 182rs^3t^6 + 455rs^3t^5 - 135rs^2t^8 + 676rs^2t^7 - \\
& 975rs^2t^6 + 125rst^9 - 520rst^8 + 598rst^7 - 35rt^{10} + 130rt^9 - 130rt^8 - 35s^{10}t + 95s^9t^2 + 130s^9t - \\
& 35s^8t^3 - 390s^8t^2 - 130s^8t - 35s^7t^4 + 182s^7t^3 + 442s^7t^2 - 35s^6t^5 + 182s^6t^4 - 273s^6t^3 - 35s^5t^6 + \\
& 182s^5t^5 - 273s^5t^4 - 35s^4t^7 + 182s^4t^6 - 273s^4t^5 - 35s^3t^8 + 182s^3t^7 - 273s^3t^6 + 95s^2t^9 - \\
& 390s^2t^8 + 442s^2t^7 - 35st^{10} + 130st^9 - 130st^8) / (2162160r^2(r-s)^2(r-t)^2(r-1)^2) - (s^2t^2(x- \\
& x_n)^6) / (360hr(r-s)^2(r-t)^2(r-1)^2) + (st(x-x_n)^7(2rs+2rt+st+2rst)) / (840h^2r^2(r-s)^2(r- \\
& t)^2(r-1)^2) + (h^4st(x-x_n)(56r^9 - 126r^8s - 126r^8t - 182r^8 + 30r^7s^2 + 316r^7st + 442r^7s + \\
& 30r^7t^2 + 442r^7t + 156r^7 + 30r^6s^3 - 100r^6s^2t - 130r^6s^2 - 100r^6st^2 - 1222r^6st - 416r^6s + \\
& 30r^6t^3 - 130r^6t^2 - 416r^6t + 30r^5s^4 - 100r^5s^3t - 130r^5s^3 + 56r^5s^2t^2 + 494r^5s^2t + 156r^5s^2 - \\
& 100r^5st^3 + 494r^5st^2 + 1300r^5st + 30r^5t^4 - 130r^5t^3 + 156r^5t^2 + 30r^4s^5 - 100r^4s^4t - 130r^4s^4 + \\
& 56r^4s^3t^2 + 494r^4s^3t + 156r^4s^3 + 56r^4s^2t^3 - 364r^4s^2t^2 - 702r^4s^2t - 100r^4st^4 + 494r^4st^3 - \\
& 702r^4st^2 + 30r^4t^5 - 130r^4t^4 + 156r^4t^3 + 30r^3s^6 - 100r^3s^5t - 130r^3s^5 + 56r^3s^4t^2 + 494r^3s^4t + \\
& 156r^3s^4 + 56r^3s^3t^3 - 364r^3s^3t^2 - 702r^3s^3t + 56r^3s^2t^4 - 364r^3s^2t^3 + 728r^3s^2t^2 - 100r^3st^5 + \\
& 494r^3st^4 - 702r^3st^3 + 30r^3t^6 - 130r^3t^5 + 156r^3t^4 + 30r^2s^7 - 100r^2s^6t - 130r^2s^6 + 56r^2s^5t^2 + \\
& 494r^2s^5t + 156r^2s^5 + 56r^2s^4t^3 - 364r^2s^4t^2 - 702r^2s^4t + 56r^2s^3t^4 - 364r^2s^3t^3 + 728r^2s^3t^2 + \\
& 56r^2s^2t^5 - 364r^2s^2t^4 + 728r^2s^2t^3 - 100r^2st^6 + 494r^2st^5 - 702r^2st^4 + 30r^2t^7 - 130r^2t^6 + 156r^2t^5 + \\
& 30rs^8 - 100rs^7t - 130rs^7 + 56rs^6t^2 + 494rs^6t + 156rs^6 + 56rs^5t^3 - 364rs^5t^2 - 702rs^5t + 56rs^4t^4 - \\
& 364rs^4t^3 + 728rs^4t^2 + 56rs^3t^5 - 364rs^3t^4 + 728rs^3t^3 + 56rs^2t^6 - 364rs^2t^5 + 728rs^2t^4 - 100rst^7 +
\end{aligned}$$

$$494rst^6 - 702rst^5 + 30rt^8 - 130rt^7 + 156rt^6 - 35s^9 + 95s^8t + 130s^8 - 35s^7t^2 - 390s^7t - 130s^7 - 35s^6t^3 + 182s^6t^2 + 442s^6t - 35s^5t^4 + 182s^5t^3 - 273s^5t^2 - 35s^4t^5 + 182s^4t^4 - 273s^4t^3 - 35s^3t^6 + 182s^3t^5 - 273s^3t^4 - 35s^2t^7 + 182s^2t^6 - 273s^2t^5 + 95st^8 - 390st^7 + 442st^6 - 35t^9 + 130t^8 - 130t^7)/((2162160r(r-s)^2(r-t)^2(r-1)^2),$$

$$\gamma_s = (x-x_n)^{13}/(17160h^8s^2(r-s)^2(s-t)^2(s-1)^2) - ((x-x_n)^{10}(2r+s+2t+4rs+8rt+4st+r^2s+2rt^2+2r^2t+st^2+2r^2+2t^2+4rst))/(5040h^5s^2(r-s)^2(s-t)^2(s-1)^2) + ((x-x_n)^{11}(4r+2s+4t+2rs+4rt+2st+r^2+t^2+1))/(7920h^6s^2(r-s)^2(s-t)^2(s-1)^2) + ((x-x_n)^9(r^2t^2+2rs+4rt+2st+2r^2s+4rt^2+4r^2t+2st^2+r^2+t^2+2rst^2+2r^2st+8rst))/(3024h^4s^2(r-s)^2(s-t)^2(s-1)^2) - ((x-x_n)^8(2r^2t^2+r^2s+2rt^2+2r^2t+st^2+4rst^2+4r^2st+r^2st^2+4rst))/(1680h^3s^2(r-s)^2(s-t)^2(s-1)^2) + (h^2(x-x_n)^3(30r^9s-35r^{10}+95r^9t+130r^9+30r^8s^2-100r^8st-130r^8s-35r^8t^2-390r^8t-130r^8+30r^7s^3-100r^7s^2t-130r^7s^2+56r^7st^2+494r^7st+156r^7s-35r^7t^3+182r^7t^2+442r^7t+30r^6s^4-100r^6s^3t-130r^6s^3+56r^6s^2t^2+494r^6s^2t+156r^6s^2+56r^6st^3-364r^6st^2-702r^6st-35r^6t^4+182r^6t^3-273r^6t^2+30r^5s^5-100r^5s^4t-130r^5s^4+56r^5s^3t^2+494r^5s^3t+156r^5s^3+56r^5s^2t^3-364r^5s^2t^2-702r^5s^2t+56r^5st^4-364r^5st^3+728r^5st^2-35r^5t^5+182r^5t^4-273r^5t^3+30r^4s^6-100r^4s^5t-130r^4s^5+56r^4s^4t^2+494r^4s^4t+156r^4s^4+56r^4s^3t^3-364r^4s^3t^2-702r^4s^3t+56r^4s^2t^4-364r^4s^2t^3+728r^4s^2t^2+56r^4st^5-364r^4st^4+728r^4st^3-35r^4t^6+182r^4t^5-273r^4t^4+30r^3s^7-100r^3s^6t-130r^3s^6+56r^3s^5t^2+494r^3s^5t+156r^3s^5+56r^3s^4t^3-364r^3s^4t^2-702r^3s^4t+56r^3s^3t^3-364r^3s^3t^2+728r^3s^3t^2+56r^3s^2t^5-364r^3s^2t^4+728r^3s^2t^3+56r^3st^6-364r^3st^5+728r^3st^4-35r^3t^7+182r^3t^6-273r^3t^5+30r^2s^8-100r^2s^7t-130r^2s^7+56r^2s^6t^2+494r^2s^6t+156r^2s^6+56r^2s^5t^3-364r^2s^5t^2-702r^2s^5t+56r^2s^4t^4-364r^2s^4t^3+728r^2s^4t^2+56r^2s^3t^5-364r^2s^3t^4+728r^2s^3t^3+56r^2s^2t^6-364r^2s^2t^5+728r^2s^2t^4+56r^2st^7-364r^2st^6+728r^2st^5-35r^2t^8+182r^2t^7-273r^2t^6-126rs^9+316rs^8t+442rs^8-100rs^7t^2-1222rs^7t-416rs^7-100rs^6t^3+494rs^6t^2+1300rs^6t-100rs^5t^4+494rs^5t^3-702rs^5t^2-100rs^4t^5+494rs^4t^4-702rs^4t^3-100rs^3t^6+494rs^3t^5-702rs^3t^4-100rs^2t^7+494rs^2t^6-702rs^2t^5-100rst^8+494rst^7-702rst^6+95rt^9-390rt^8+442rt^7+56s^{10}-126s^9t-182s^9+30s^8t^2+442s^8t+156s^8+30s^7t^3-130s^7t^2-416s^7t+30s^6t^4-130s^6t^3+156s^6t^2+30s^5t^5-130s^5t^4+156s^5t^3+30s^4t^6-130s^4t^5+156s^4t^4+30s^3t^7-130s^3t^6+156s^3t^5+30s^2t^8-130s^2t^7+156s^2t^6+30st^9-130st^8+156st^7-35t^{10}+130t^9-130t^8)/((2162160s^2(r-s)^2(s-t)^2(s-1)^2) - ((x-x_n)^{12}(2r+s+2t+2))/(11880h^7s^2(r-s)^2(s-t)^2(s-1)^2) - (h^3(x-x_n)^2(30r^9s^2-35r^{10}t-35r^{10}s+125r^9st+130r^9s+95r^9t^2+130r^9t+30r^8s^3-70r^8s^2t-130r^8s^2-135r^8st-130r^8s-35r^8t^3-390r^8t^2-130r^8t+30r^7s^4-70r^7s^3t-130r^7s^3-44r^7s^2t^2+364r^7s^2t+156r^7s^2+21r^7st^3+676r^7st^2+598r^7st-35r^7t^4+182r^7t^3+442r^7t^2+30r^6s^5-70r^6s^4t-130r^6s^4-44r^6s^3t^2+364r^6s^3t+156r^6s^3+112r^6s^2t^3+130r^6s^2t^2-546r^6s^2t+21r^6st^4-182r^6st^3-975r^6st^2-35r^6t^5+182r^6t^4-273r^6t^3+30r^5s^6-70r^5s^5t-130r^5s^5-44r^5s^4t^2+364r^5s^4t+156r^5s^4+112r^5s^3t^3+130r^5s^3t^2-546r^5s^3t+112r^5s^2t^4-728r^5s^2t^3+26r^5s^2t^2+21r^5st^5-182r^5st^4+455r^5st^3-35r^5t^6+182r^5t^5-273r^5t^4+30r^4s^7-70r^4s^6t-130r^4s^6-44r^4s^5t^2+364r^4s^5t+156r^4s^5+112r^4s^4t^3+130r^4s^4t^2-546r^4s^4t+112r^4s^3t^4-728r^4s^3t^3+26r^4s^3t^2+112r^4s^2t^5-728r^4s^2t^4+1456r^4s^2t^3+21r^4st^6-182r^4st^5+455r^4st^4-35r^4t^7+182r^4t^6-273r^4t^5+30r^3s^8-70r^3s^7t-130r^3s^7-44r^3s^6t^2+364r^3s^6t+156r^3s^6+112r^3s^5t^3+130r^3s^5t^2-546r^3s^5t+112r^3s^4t^4-728r^3s^4t^3+26r^3s^4t^2+112r^3s^3t^5-728r^3s^3t^4+1456r^3s^3t^3+112r^3s^2t^6-728r^3s^2t^5+1456r^3s^2t^4+21r^3st^7-182r^3st^6+455r^3st^5-35r^3st^8+182r^3st^7-273r^3st^6-126r^2s^9+346r^2s^8t+442r^2s^8-200r^2s^7t^2-1352r^2s^7t-416r^2s^7-44r^2s^6t^3+988r^2s^6t^2+1456r^2s^6t-44r^2s^5t^4+130r^2s^5t^3-1404r^2s^5t^2-44r^2s^4t^5+130r^2s^4t^4+26r^2s^4t^3-44r^2s^3t^6+130r^2s^3t^5+26r^2s^3t^4-44r^2s^2t^7+130r^2s^2t^6+26r^2s^2t^5-135r^2st^8+676r^2st^7-975r^2st^6+95r^2t^9-390r^2t^8+442r^2t^7+56rs^{10}-252rs^9t-182rs^9+346rs^8t^2+884rs^8t+156rs^8-70rs^7t^3-1352rs^7t^2-832rs^7t-70rs^6t^4+364rs^6t^3+1456rs^6t^2-70rs^5t^5+364rs^5t^4-546rs^5t^3-70rs^4t^6+364rs^4t^5-546rs^4t^4-70rs^3t^7+364rs^3t^6-546rs^3t^5-70rs^2t^8+364rs^2t^7-546rs^2t^6+125rst^9-520rst^8+598rst^7-35rt^{10}+130rt^9-130rt^8+56s^{10}t-126s^9t^2-182s^9t+30s^8t^3+442s^8t^2+156s^8t+30s^7t^4-130s^7t^3-416s^7t^2+30s^6t^5-130s^6t^4+156s^6t^3+30s^5t^6-130s^5t^5+156s^5t^4+30s^4t^7-130s^4t^6+156s^4t^5+30s^3t^8-130s^3t^7+156s^3t^6+30s^2t^9-130s^2t^8+156s^2t^7-35st^{10}+130st^9-130st^8)/((2162160s^2(r-s)^2(s-t)^2(s-1)^2) - (r^2t^2(x-x_n)^6)/(360hs(r-s)^2(s-t)^2(s-1)^2) + (rt(x-x_n)^7(2rs+rt+2st+2rst))/(840h^2s^2(r-s)^2(s-t)^2(s-1)^2) + (h^4rt(x-x_n)(30r^8s-35r^9+95r^8t+130r^8+30r^7s^2-100r^7st-130r^7s-35r^7t^2-390r^7t-130r^7+30r^6s^3-100r^6s^2t-130r^6s^2+56r^6st^2+494r^6st+156r^6s-35r^6t^3+182r^6t^2+442r^6t+30r^5s^4-100r^5s^3t-130r^5s^3+30r^5s^2t^3+130r^5s^2t^2-546r^5s^2t+21r^5st^4-182r^5st^3-975r^5st^2-35r^5t^5+182r^5t^4-273r^5t^3+30r^4s^6-100r^4s^5t-130r^4s^5+56r^4s^4t^2+494r^4s^4t+156r^4s^4+56r^4s^3t^3-364r^4s^3t^2-702r^4s^3t+56r^4s^2t^4-364r^4s^2t^3+728r^4s^2t^2+56r^4st^5-364r^4st^4+728r^4st^3-35r^4t^6+182r^4t^5-273r^4t^4+30r^3s^7-100r^3s^6t-130r^3s^6+56r^3s^5t^2+494r^3s^5t+156r^3s^5+56r^3s^4t^3-364r^3s^4t^2-702r^3s^4t+56r^3s^3t^3-364r^3s^3t^2+728r^3s^3t^2+56r^3s^2t^5-364r^3s^2t^4+728r^3s^2t^3+56r^3st^6-364r^3st^5+728r^3st^4-35r^3t^7+182r^3t^6-273r^3t^5+30r^2s^8-100r^2s^7t-130r^2s^7+56r^2s^6t^2+494r^2s^6t+156r^2s^6+56r^2s^5t^3-364r^2s^5t^2-702r^2s^5t+56r^2s^4t^4-364r^2s^4t^3+728r^2s^4t^2+56r^2s^3t^5-364r^2s^3t^4+728r^2s^3t^3+56r^2s^2t^6-364r^2s^2t^5+728r^2s^2t^4+56r^2st^7-364r^2st^6+728r^2st^5-35r^2t^8+182r^2t^7-273r^2t^6-126rs^9+316rs^8t+442rs^8-100rs^7t^2-1222rs^7t-416rs^7-100rs^6t^3+494rs^6t^2+1300rs^6t-100rs^5t^4+494rs^5t^3-702rs^5t^2-100rs^4t^5+494rs^4t^4-702rs^4t^3-100rs^3t^6+494rs^3t^5-702rs^3t^4-100rs^2t^7+494rs^2t^6-702rs^2t^5-100rst^8+494rst^7-702rst^6+95rt^9-390rt^8+442rt^7+56s^{10}-126s^9t-182s^9+30s^8t^2+442s^8t+156s^8+30s^7t^3-130s^7t^2-416s^7t+30s^6t^4-130s^6t^3+156s^6t^2+30s^5t^5-130s^5t^4+156s^5t^3+30s^4t^6-130s^4t^5+156s^4t^4+30s^3t^7-130s^3t^6+156s^3t^5+30s^2t^8-130s^2t^7+156s^2t^6+30st^9-130st^8+156st^7-35t^{10}+130t^9-130t^8)/((2162160s^2(r-s)^2(s-t)^2(s-1)^2) - (r^2t^2(x-x$$



$$\begin{aligned}
& 56r^5s^2t^2 + 494r^5s^2t + 156r^5s^2 + 56r^5st^3 - 364r^5st^2 - 702r^5st - 35r^5t^4 + 182r^5t^3 - 273r^5t^2 + \\
& 30r^4s^5 - 100r^4s^4t - 130r^4s^4 + 56r^4s^3t^2 + 494r^4s^3t + 156r^4s^3 + 56r^4s^2t^3 - 364r^4s^2t^2 - 702r^4s^2t + \\
& 56r^4st^4 - 364r^4st^3 + 728r^4st^2 - 35r^4t^5 + 182r^4t^4 - 273r^4t^3 + 30r^3s^6 - 100r^3s^5t - 130r^3s^5 + \\
& 56r^3s^4t^2 + 494r^3s^4t + 156r^3s^4 + 56r^3s^3t^3 - 364r^3s^3t^2 - 702r^3s^3t + 56r^3s^2t^4 - 364r^3s^2t^3 + \\
& 728r^3s^2t^2 + 56r^3st^5 - 364r^3st^4 + 728r^3st^3 - 35r^3t^6 + 182r^3t^5 - 273r^3t^4 + 30r^2s^7 - 100r^2s^6t - \\
& 130r^2s^6 + 56r^2s^5t^2 + 494r^2s^5t + 156r^2s^5 + 56r^2s^4t^3 - 364r^2s^4t^2 - 702r^2s^4t + 56r^2s^3t^4 - \\
& 364r^2s^3t^3 + 728r^2s^3t^2 + 56r^2s^2t^5 - 364r^2s^2t^4 + 728r^2s^2t^3 + 56r^2st^6 - 364r^2st^5 + 728r^2st^4 - \\
& 35r^2t^7 + 182r^2t^6 - 273r^2t^5 - 126r^2s^8 + 316r^2s^7t + 442r^2s^7 - 100r^2s^6t^2 - 1222r^2s^6t - 416r^2s^6 - \\
& 100r^2s^5t^3 + 494r^2s^5t^2 + 1300r^2s^5t - 100r^2s^4t^4 + 494r^2s^4t^3 - 702r^2s^4t^2 - 100r^2s^3t^5 + 494r^2s^3t^4 - \\
& 702r^2s^3t^3 - 100r^2s^2t^6 + 494r^2s^2t^5 - 702r^2s^2t^4 - 100r^2st^7 + 494r^2st^6 - 702r^2st^5 + 95rt^8 - 390rt^7 + \\
& 442rt^6 + 56s^9 - 126s^8t - 182s^8 + 30s^7t^2 + 442s^7t + 156s^7 + 30s^6t^3 - 130s^6t^2 - 416s^6t + 30s^5t^4 - \\
& 130s^5t^3 + 156s^5t^2 + 30s^4t^5 - 130s^4t^4 + 156s^4t^3 + 30s^3t^6 - 130s^3t^5 + 156s^3t^4 + 30s^2t^7 - 130s^2t^6 + \\
& 156s^2t^5 + 30st^8 - 130st^7 + 156st^6 - 35t^9 + 130t^8 - 130t^7) / (2162160s(r-s)^2(s-t)^2(s-1)^2),
\end{aligned}$$

$$\begin{aligned}
\gamma_t = & (x-x_n)^{13} / (17160h^8t^2(r-t)^2(s-t)^2(t-1)^2) - ((x-x_n)^{10}(2r+2s+t+8rs+4rt+4st+ \\
& 2rs^2+2r^2s+r^2t+s^2t+2r^2+2s^2+4rst)) / (5040h^5t^2(r-t)^2(s-t)^2(t-1)^2) + ((x-x_n)^{11}(4r+ \\
& 4s+2t+4rs+2rt+2st+r^2+s^2+1)) / (7920h^6t^2(r-t)^2(s-t)^2(t-1)^2) + ((x-x_n)^9(r^2s^2+ \\
& 4rs+2rt+2st+4rs^2+4r^2s+2r^2t+2s^2t+r^2+s^2+2rs^2t+2r^2st+8rst)) / (3024h^4t^2(r- \\
& t)^2(s-t)^2(t-1)^2) - ((x-x_n)^8(2r^2s^2+2rs^2+2r^2s+r^2t+s^2t+4rs^2t+4r^2st+r^2s^2t+ \\
& 4rst)) / (1680h^3t^2(r-t)^2(s-t)^2(t-1)^2) + (h^2(x-x_n)^3(95r^9s-35r^{10}+30r^9t+130r^9-35r^8s^2- \\
& 100r^8st-390r^8s+30r^8t^2-130r^8t-130r^8-35r^7s^3+56r^7s^2t+182r^7s^2-100r^7st^2+494r^7st+ \\
& 442r^7s+30r^7t^3-130r^7t^2+156r^7t-35r^6s^4+56r^6s^3t+182r^6s^3+56r^6s^2t^2-364r^6s^2t- \\
& 273r^6s^2-100r^6st^3+494r^6st^2-702r^6st+30r^6t^4-130r^6t^3+156r^6t^2-35r^5s^5+56r^5s^4t+ \\
& 182r^5s^4+56r^5s^3t^2-364r^5s^3t-273r^5s^3+56r^5s^2t^3-364r^5s^2t^2+728r^5s^2t-100r^5st^4+ \\
& 494r^5st^3-702r^5st^2+30r^5t^5-130r^5t^4+156r^5t^3-35r^4s^6+56r^4s^5t+182r^4s^5+56r^4s^4t^2- \\
& 364r^4s^4t-273r^4s^4+56r^4s^3t^3-364r^4s^3t^2+728r^4s^3t+56r^4s^2t^4-364r^4s^2t^3+728r^4s^2t^2- \\
& 100r^4st^5+494r^4st^4-702r^4st^3+30r^4t^6-130r^4t^5+156r^4t^4-35r^3s^7+56r^3s^6t+182r^3s^6+ \\
& 56r^3s^5t^2-364r^3s^5t-273r^3s^5+56r^3s^4t^3-364r^3s^4t^2+728r^3s^4t+56r^3s^3t^4-364r^3s^3t^3+ \\
& 728r^3s^3t^2+56r^3s^2t^5-364r^3s^2t^4+728r^3s^2t^3-100r^3st^6+494r^3st^5-702r^3st^4+30r^3t^7- \\
& 130r^3t^6+156r^3t^5-35r^2s^8+56r^2s^7t+182r^2s^7+56r^2s^6t^2-364r^2s^6t-273r^2s^6+56r^2s^5t^3- \\
& 364r^2s^5t^2+728r^2s^5t+56r^2s^4t^4-364r^2s^4t^3+728r^2s^4t^2+56r^2s^3t^5-364r^2s^3t^4+728r^2s^3t^3+ \\
& 56r^2s^2t^6-364r^2s^2t^5+728r^2s^2t^4-100r^2st^7+494r^2st^6-702r^2st^5+30r^2t^8-130r^2t^7+ \\
& 156r^2t^6+95rs^9-100rs^8t-390rs^8-100rs^7t^2+494rs^7t+442rs^7-100rs^6t^3+494rs^6t^2- \\
& 702rs^6t-100rs^5t^4+494rs^5t^3-702rs^5t^2-100rs^4t^5+494rs^4t^4-702rs^4t^3-100rs^3t^6+ \\
& 494rs^3t^5-702rs^3t^4-100rs^2t^7+494rs^2t^6-702rs^2t^5+316rst^8-1222rst^7+1300rst^6- \\
& 126rt^9+442rt^8-416rt^7-35s^{10}+30s^9t+130s^9+30s^8t^2-130s^8t-130s^8+30s^7t^3-130s^7t^2+ \\
& 156s^7t+30s^6t^4-130s^6t^3+156s^6t^2+30s^5t^5-130s^5t^4+156s^5t^3+30s^4t^6-130s^4t^5+156s^4t^4+ \\
& 30s^3t^7-130s^3t^6+156s^3t^5+30s^2t^8-130s^2t^7+156s^2t^6-126st^9+442st^8-416st^7+56t^{10}- \\
& 182t^9+156t^8)) / (2162160t^2(r-t)^2(s-t)^2(t-1)^2) - ((x-x_n)^{12}(2r+2s+t+2)) / (11880h^7t^2(r- \\
& t)^2(s-t)^2(t-1)^2) - (h^3(x-x_n)^2(95r^9s^2-35r^{10}t-35r^{10}s+125r^9st+130r^9s+30r^9t^2+ \\
& 130r^9t-35r^8s^3-135r^8s^2t-390r^8s^2-70r^8st^2-520r^8st-130r^8s+30r^8t^3-130r^8t^2- \\
& 130r^8t-35r^7s^4+21r^7s^3t+182r^7s^3-44r^7s^2t^2+676r^7s^2t+442r^7s^2-70r^7st^3+364r^7st^2+ \\
& 598r^7st+30r^7t^4-130r^7t^3+156r^7t^2-35r^6s^5+21r^6s^4t+182r^6s^4+112r^6s^3t^2-182r^6s^3t- \\
& 273r^6s^3-44r^6s^2t^3+130r^6s^2t^2-975r^6s^2t-70r^6s^4t+364r^6st^3-546r^6st^2+30r^6t^5-130r^6t^4+ \\
& 156r^6t^3-35r^5s^6+21r^5s^5t+182r^5s^5+112r^5s^4t^2-182r^5s^4t-273r^5s^4+112r^5s^3t^3-728r^5s^3t^2+ \\
& 455r^5s^3t-44r^5s^2t^4+130r^5s^2t^3+26r^5s^2t^2-70r^5st^5+364r^5st^4-546r^5st^3+30r^5t^6-130r^5t^5+ \\
& 156r^5t^4-35r^4s^7+21r^4s^6t+182r^4s^6+112r^4s^5t^2-182r^4s^5t-273r^4s^5+112r^4s^4t^3-728r^4s^4t^2+ \\
& 455r^4s^4t+112r^4s^3t^4-728r^4s^3t^3+1456r^4s^3t^2-44r^4s^2t^5+130r^4s^2t^4+26r^4s^2t^3-70r^4st^6+ \\
& 364r^4st^5-546r^4st^4+30r^4t^7-130r^4t^6+156r^4t^5-35r^3s^8+21r^3s^7t+182r^3s^7+112r^3s^6t^2- \\
& 182r^3s^6t-273r^3s^6+112r^3s^5t^3-728r^3s^5t^2+455r^3s^5t+112r^3s^4t^4-728r^3s^4t^3+1456r^3s^4t^2+ \\
& 112r^3s^3t^5-728r^3s^3t^4+1456r^3s^3t^3-44r^3s^2t^6+130r^3s^2t^5+26r^3s^2t^4-70r^3st^7+364r^3st^6- \\
& 546r^3st^5+30r^3t^8-130r^3t^7+156r^3t^6+95r^2s^9-135r^2s^8t-390r^2s^8-44r^2s^7t^2+676r^2s^7t+ \\
& 442r^2s^7-44r^2s^6t^3+130r^2s^6t^2-975r^2s^6t-44r^2s^5t^4+130r^2s^5t^3+26r^2s^5t^2-44r^2s^4t^5+ \\
& 130r^2s^4t^4+26r^2s^4t^3+44r^2s^3t^6+130r^2s^3t^5+26r^2s^3t^4-200r^2s^2t^7+988r^2s^2t^6-1404r^2s^2t^5+ \\
& 346r^2st^8-1352r^2st^7+1456r^2st^6-126r^2t^9+442r^2t^8-416r^2t^7-35rs^{10}+125rs^9t+130rs^9-
\end{aligned}$$

$$\begin{aligned}
& 70rs^8t^2 - 520rs^8t - 130rs^8 - 70rs^7t^3 + 364rs^7t^2 + 598rs^7t - 70rs^6t^4 + 364rs^6t^3 - 546rs^6t^2 - \\
& 70rs^5t^5 + 364rs^5t^4 - 546rs^5t^3 - 70rs^4t^6 + 364rs^4t^5 - 546rs^4t^4 - 70rs^3t^7 + 364rs^3t^6 - 546rs^3t^5 + \\
& 346rs^2t^8 - 1352rs^2t^7 + 1456rs^2t^6 - 252rs^2t^5 + 884rs^2t^4 - 832rs^2t^3 + 56rt^{10} - 182rt^9 + 156rt^8 - \\
& 35s^{10}t + 30s^9t^2 + 130s^9t + 30s^8t^3 - 130s^8t^2 - 130s^8t + 30s^7t^4 - 130s^7t^3 + 156s^7t^2 + 30s^6t^5 - \\
& 130s^6t^4 + 156s^6t^3 + 30s^5t^6 - 130s^5t^5 + 156s^5t^4 + 30s^4t^7 - 130s^4t^6 + 156s^4t^5 + 30s^3t^8 - 130s^3t^7 + \\
& 156s^3t^6 - 126s^2t^9 + 442s^2t^8 - 416s^2t^7 + 56st^{10} - 182st^9 + 156st^8)/((2162160t^2(r-t)^2(s-t)^2(t-1)^2) - \\
& (r^2s^2(x-x_n)^6)/(360ht(r-t)^2(s-t)^2(t-1)^2) + (rs(x-x_n)^7(rs+2rt+2st+2rst))/(840h^2t^2(r-t)^2(s-t)^2(t-1)^2) + (h^4rs(x-x_n)(95r^8s-35r^9+30r^8t+130r^8-35r^7s^2- \\
& 100r^7st-390r^7s+30r^7t^2-130r^7t-130r^7-35r^6s^3+56r^6s^2t+182r^6s^2-100r^6st^2+494r^6st+ \\
& 442r^6s+30r^6t^3-130r^6t^2+156r^6t-35r^5s^4+56r^5s^3t+182r^5s^3+56r^5s^2t^2-364r^5s^2t- \\
& 273r^5s^2-100r^5st^3+494r^5st^2-702r^5st+30r^5t^4-130r^5t^3+156r^5t^2-35r^4s^5+56r^4s^4t+ \\
& 182r^4s^4+56r^4s^3t^2-364r^4s^3t-273r^4s^3+56r^4s^2t^3-364r^4s^2t^2+728r^4s^2t-100r^4s^4+ \\
& 494r^4st^3-702r^4st^2+30r^4t^5-130r^4t^4+156r^4t^3-35r^3s^6+56r^3s^5t+182r^3s^5+56r^3s^4t^2- \\
& 364r^3s^4t-273r^3s^4+56r^3s^3t^3-364r^3s^3t^2+728r^3s^3t+56r^3s^2t^4-364r^3s^2t^3+728r^3s^2t^2- \\
& 100r^3s^5t+494r^3s^4t-702r^3s^3t+30r^3t^6-130r^3t^5+156r^3t^4-35r^2s^7+56r^2s^6t+182r^2s^6+ \\
& 56r^2s^5t^2-364r^2s^5t-273r^2s^5+56r^2s^4t^3-364r^2s^4t^2+728r^2s^4t+56r^2s^3t^4-364r^2s^3t^3+ \\
& 728r^2s^3t^2+56r^2s^2t^5-364r^2s^2t^4+728r^2s^2t^3-100r^2st^6+494r^2st^5-702r^2st^4+30r^2t^7- \\
& 130r^2t^6+156r^2t^5+95rs^8-100rs^7t-390rs^7-100rs^6t^2+494rs^6t+442rs^6-100rs^5t^3+ \\
& 494rs^5t^2-702rs^5t-100rs^4t^4+494rs^4t^3-702rs^4t^2-100rs^3t^5+494rs^3t^4-702rs^3t^3- \\
& 100rs^2t^6+494rs^2t^5-702rs^2t^4+316rst^7-1222rst^6+1300rst^5-126rt^8+442rt^7-416rt^6- \\
& 35s^9+30s^8t+130s^8+30s^7t^2-130s^7t-130s^7+30s^6t^3-130s^6t^2+156s^6t+30s^5t^4-130s^5t^3+ \\
& 156s^5t^2+30s^4t^5-130s^4t^4+156s^4t^3+30s^3t^6-130s^3t^5+156s^3t^4+30s^2t^7-130s^2t^6+156s^2t^5- \\
& 126st^8+442st^7-416st^6+56t^9-182t^8+156t^7))/((2162160t(r-t)^2(s-t)^2(t-1)^2),
\end{aligned}$$

$$\begin{aligned}
\gamma_1 = & (x-x_n)^{13}/(17160h^8(r-1)^2(s-1)^2(t-1)^2) - ((x-x_n)^{10}(2r^2s+2r^2t+r^2+2rs^2+ \\
& 8rst+4rs+2rt^2+4rt+2s^2t+s^2+2st^2+4st+t^2))/(5040h^5(r-1)^2(s-1)^2(t-1)^2) + \\
& ((x-x_n)^9(r^2s^2+4r^2st+2r^2s+r^2t^2+2r^2t+4rs^2t+2rs^2+4rst^2+8rst+2rt^2+s^2t^2+ \\
& 2s^2t+2st^2))/(3024h^4(r-1)^2(s-1)^2(t-1)^2) - (h^3(x-x_n)^2(95r^9s^2-35r^{10}t-35r^{10}s+ \\
& 190r^9st+65r^9s+95r^9t^2+65r^9t-35r^8s^3-330r^8s^2t-195r^8s^2-330r^8st^2-390r^8st-35r^8t^3- \\
& 195r^8t^2-35r^7s^4+112r^7s^3t+91r^7s^3+294r^7s^2t^2+780r^7s^2t+112r^7st^3+780r^7st^2-35r^7t^4+ \\
& 91r^7t^3-35r^6s^5+112r^6s^4t+91r^6s^4+21r^6s^3t^2-364r^6s^3t+21r^6s^2t^3-910r^6s^2t^2+112r^6t^3+ \\
& 364r^6st^3-35r^6t^5+91r^6t^4-35r^5s^6+112r^5s^5t+91r^5s^5+21r^5s^4t^2-364r^5s^4t-252r^5s^3t^3+ \\
& 91r^5s^3t^2+21r^5s^2t^4+91r^5s^2t^3+112r^5st^5-364r^5st^4-35r^5t^6+91r^5t^5-35r^4s^7+112r^4s^6t+ \\
& 91r^4s^6+21r^4s^5t^2-364r^4s^5t-252r^4s^4t^3+91r^4s^4t^2-252r^4s^3t^4+1092r^4s^3t^3+21r^4s^2t^5+ \\
& 91r^4s^2t^4+112r^4st^6-364r^4st^5-35r^4t^7+91r^4t^6-35r^3s^8+112r^3s^7t+91r^3s^7+21r^3s^6t^2- \\
& 364r^3s^6t-252r^3s^5t^3+91r^3s^5t^2-252r^3s^4t^4+1092r^3s^4t^3-252r^3s^3t^5+1092r^3s^3t^4+21r^3s^2t^6+ \\
& 91r^3s^2t^5+112r^3st^7-364r^3st^6-35r^3t^8+91r^3t^7+95r^2s^9-330r^2s^8t-195r^2s^8+294r^2s^7t^2+ \\
& 780r^2s^7t+21r^2s^6t^3-910r^2s^6t^2+21r^2s^5t^4+91r^2s^5t^3+21r^2s^4t^5+91r^2s^4t^4+21r^2s^3t^6+ \\
& 91r^2s^3t^5+294r^2s^2t^7-910r^2s^2t^6-330r^2s^2t^5+780r^2st^7+95r^2t^9-195r^2t^8-35rs^{10}+190rs^9t+ \\
& 65rs^9-330rs^8t^2-390rs^8st+112rs^7t^3+780rs^7t^2+112rs^6t^4-364rs^6t^3+112rs^5t^5-364rs^5t^4+ \\
& 112rs^4t^6-364rs^4t^5+112rs^3t^7-364rs^3t^6-330rs^2t^8+780rs^2t^7+190rst^9-390rst^8-35rt^{10}+ \\
& 65rt^9-35s^{10}t+95s^9t^2+65s^9t-35s^8t^3-195s^8t^2-35s^7t^4+91s^7t^3-35s^6t^5+91s^6t^4+112s^5t^6+ \\
& 91s^5t^5-35s^4t^7+91s^4t^6-35s^3t^8+91s^3t^7+95s^2t^9-195s^2t^8-35st^{10}+65st^9))/((2162160(r-1)^2(s-1)^2(t-1)^2) - \\
& (h^2(x-x_n)^3(35r^{10}-95r^9s-95r^9t-65r^9+35r^8s^2+295r^8st+195r^8s+ \\
& 35r^8t^2+195r^8t+35r^7s^3-147r^7s^2t-91r^7s^2-147r^7st^2-689r^7st+35r^7t^3-91r^7t^2+35r^6s^4- \\
& 147r^6s^3t-91r^6s^3+126r^6s^2t^2+455r^6s^2t-147r^6st^3+455r^6st^2+35r^6t^4-91r^6t^3+35r^5s^5- \\
& 147r^5s^4t-91r^5s^4+126r^5s^3t^2+455r^5s^3t+126r^5s^2t^3-546r^5s^2t^2-147r^5st^4+455r^5st^3+ \\
& 35r^5t^5-91r^5t^4+35r^4s^6-147r^4s^5t-91r^4s^5+126r^4s^4t^2+455r^4s^4t+126r^4s^3t^3-546r^4s^3t^2+ \\
& 126r^4s^2t^4-546r^4s^2t^3-147r^4st^5+455r^4st^4+35r^4t^6-91r^4t^5+35r^3s^7-147r^3s^6t-91r^3s^6+ \\
& 126r^3s^5t^2+455r^3s^5t+126r^3s^4t^3-546r^3s^4t^2+126r^3s^3t^4-546r^3s^3t^3+126r^3s^2t^5-546r^3s^2t^4- \\
& 147r^3st^6+455r^3st^5+35r^3t^7-91r^3t^6+35r^2s^8-147r^2s^7t-91r^2s^7+126r^2s^6t^2+455r^2s^6t+ \\
& 126r^2s^5t^3-546r^2s^5t^2+126r^2s^4t^4-546r^2s^4t^3+126r^2s^3t^5-546r^2s^3t^4+126r^2s^2t^6-546r^2s^2t^5- \\
& 147r^2st^7+455r^2st^6+35r^2t^8-91r^2t^7-95rs^9+295rs^8t+195rs^8-147rs^7t^2-689rs^7t- \\
& 147rs^6t^3+455rs^6t^2-147rs^5t^4+455rs^5t^3-147rs^4t^5+455rs^4t^4-147rs^3t^6+455rs^3t^5- \\
& 147rs^2t^7+455rs^2t^6+295rst^8-689rst^7-95rt^9+195rt^8+35s^{10}-95s^9t-65s^9+35s^8t^2+
\end{aligned}$$

$$\begin{aligned}
& 195s^8t + 35s^7t^3 - 91s^7t^2 + 35s^6t^4 - 91s^6t^3 + 35s^5t^5 - 91s^5t^4 + 35s^4t^6 - 91s^4t^5 + 35s^3t^7 - \\
& 91s^3t^6 + 35s^2t^8 - 91s^2t^7 - 95st^9 + 195st^8 + 35t^{10} - 65t^9) / (2162160(r-1)^2(s-1)^2(t-1)^2) - \\
& ((x-x_n)^{12}(2r+2s+2t+1)) / (11880h^7(r-1)^2(s-1)^2(t-1)^2) - ((x-x_n)^8(2r^2s^2t+r^2s^2+ \\
& 2r^2st^2+4r^2st+r^2t^2+2rs^2t^2+4rs^2t+4rst^2+s^2t^2)) / (1680h^3(r-1)^2(s-1)^2(t-1)^2) + ((x- \\
& x_n)^{11}(r^2+4rs+4rt+2r+s^2+4st+2s+t^2+2t)) / (7920h^6(r-1)^2(s-1)^2(t-1)^2) - (r^2s^2t^2(x- \\
& x_n)^6) / (360h(r-1)^2(s-1)^2(t-1)^2) + (rst(x-x_n)^7(2rs+2rt+2st+rst)) / (840h^2(r-1)^2(s- \\
& 1)^2(t-1)^2) - (h^4rst(x-x_n)(35r^9-95r^8s-95r^8t-65r^8+35r^7s^2+295r^7st+195r^7s+ \\
& 35r^7t^2+195r^7t+35r^6s^3-147r^6s^2t-91r^6s^2-147r^6st^2-689r^6st+35r^6t^3-91r^6t^2+35r^5s^4- \\
& 147r^5s^3t-91r^5s^3+126r^5s^2t^2+455r^5s^2t-147r^5st^3+455r^5st^2+35r^5t^4-91r^5t^3+35r^4s^5- \\
& 147r^4s^4t-91r^4s^4+126r^4s^3t^2+455r^4s^3t+126r^4s^2t^3-546r^4s^2t^2-147r^4st^4+455r^4st^3+ \\
& 35r^4t^5-91r^4t^4+35r^3s^6-147r^3s^5t-91r^3s^5+126r^3s^4t^2+455r^3s^4t+126r^3s^3t^3-546r^3s^3t^2+ \\
& 126r^3s^2t^4-546r^3s^2t^3-147r^3st^5+455r^3st^4+35r^3t^6-91r^3t^5+35r^2s^7-147r^2s^6t-91r^2s^6+ \\
& 126r^2s^5t^2+455r^2s^5t+126r^2s^4t^3-546r^2s^4t^2+126r^2s^3t^4-546r^2s^3t^3+126r^2s^2t^5-546r^2s^2t^4- \\
& 147r^2st^6+455r^2st^5+35r^2t^7-91r^2t^6-95rs^8+295rs^7t+195rs^7-147rs^6t^2-689rs^6t- \\
& 147rs^5t^3+455rs^5t^2-147rs^4t^4+455rs^4t^3-147rs^3t^5+455rs^3t^4-147rs^2t^6+455rs^2t^5+ \\
& 295rst^7-689rst^6-95rt^8+195rt^7+35s^9-95s^8t-65s^8+35s^7t^2+195s^7t+35s^6t^3-91s^6t^2+ \\
& 35s^5t^4-91s^5t^3+35s^4t^5-91s^4t^4+35s^3t^6-91s^3t^5+35s^2t^7-91s^2t^6-95st^8+195st^7+35t^9- \\
& 65t^8) / (2162160(r-1)^2(s-1)^2(t-1)^2).
\end{aligned}$$

## Appendix II

$$\begin{aligned}
B_{116}^{[0]} &= \frac{-h^4 r^4}{2162160 s^3 t^3} (-70r^7 st - 70r^7 s - 70r^7 t + 260r^6 s^2 t + 260r^6 s^2 + 260r^6 st^2 + 645r^6 st + 260r^6 s \\
&\quad + 260r^6 t^2 + 260r^6 t - 260r^5 s^3 t - 260r^5 s^3 - 1040r^5 s^2 t^2 - 1820r^5 s^2 t - 1040r^5 s^2 - 260r^5 st^3 - \\
&\quad - 1820r^5 st^2 - 1820r^5 st - 260r^5 s - 260r^5 t^3 - 1040r^5 t^2 - 260r^5 t + 1144r^4 s^3 t^2 + 1742r^4 s^3 t + \\
&\quad + 1144r^4 s^3 + 1144r^4 s^2 t^3 + 4680r^4 s^2 t^2 + 4680r^4 s^2 t + 1144r^4 s^2 + 1742r^4 st^3 + 4680r^4 st^2 + 1742 \\
&\quad + r^4 st + 1144r^4 t^3 + 1144r^4 t^2 - 1430r^3 s^3 t^3 - 4576r^3 s^3 t^2 - 4576r^3 s^3 t - 1430r^3 s^3 - 4576r^3 s^2 t^3 \\
&\quad - 6864r^3 s^2 t^2 - 4576r^3 s^2 t - 4576r^3 st^3 - 4576r^3 st^2 - 1430r^3 t^3 + 5005r^2 s^3 t^3 + 2860r^2 s^3 t^2 + \\
&\quad + 5005r^2 s^3 t + 2860r^2 s^2 t^3 + 2860r^2 s^2 t^2 + 5005r^2 st^3 + 8580rs^3 t^3 + 8580rs^3 t^2 + 8580rs^2 t^3 - \\
&\quad - 77220s^3 t^3), \\
B_{216}^{[0]} &= \frac{-h^4 s^4}{2162160 r^3 t^3} (-260r^3 s^5 t - 260r^3 s^5 + 1144r^3 s^4 t^2 + 1742r^3 s^4 t + 1144r^3 s^4 - 1430r^3 s^3 t^3 - 4576 \\
&\quad + r^3 s^3 t^2 - 4576r^3 s^3 t - 1430r^3 s^3 + 5005r^3 s^2 t^3 + 2860r^3 s^2 t^2 + 5005r^3 s^2 t + 8580r^3 st^3 + 8580r^3 st^2 \\
&\quad - 77220r^3 t^3 + 260r^2 s^6 t + 260r^2 s^6 - 1040r^2 s^5 t^2 - 1820r^2 s^5 t - 1040r^2 s^5 + 1144r^2 s^4 t^3 + 4680r^2 \\
&\quad + s^4 t^2 + 4680r^2 s^4 t + 1144r^2 s^4 - 4576r^2 s^3 t^3 - 6864r^2 s^3 t^2 - 4576r^2 s^3 t + 2860r^2 s^2 t^3 + 2860r^2 s^2 t^2 \\
&\quad + 8580r^2 st^3 - 70rs^7 t - 70rs^7 + 260rs^6 t^2 + 645rs^6 t + 260rs^6 - 260rs^5 t^3 - 1820rs^5 t^2 - 1820rs^5 \\
&\quad + t - 260rs^5 + 1742rs^4 t^3 + 4680rs^4 t^2 + 1742rs^4 t - 4576rs^3 t^3 - 4576rs^3 t^2 + 5005rs^2 t^3 - 70s^7 t + \\
&\quad + 260s^6 t^2 + 260s^6 t - 260s^5 t^3 - 1040s^5 t^2 - 260s^5 t + 1144s^4 t^3 + 1144s^4 t^2 - 1430s^3 t^3), \\
B_{316}^{[0]} &= \frac{-h^4 t^4}{2162160 r^3 s^3} (-1430r^3 s^3 t^3 + 5005r^3 s^3 t^2 + 8580r^3 s^3 t - 77220r^3 s^3 + 1144r^3 s^2 t^4 - 4576r^3 s^2 t^3 + \\
&\quad + 2860r^3 s^2 t^2 + 8580r^3 s^2 t - 260r^3 st^5 + 1742r^3 st^4 - 4576r^3 st^3 + 5005r^3 st^2 - 260r^3 t^5 + 1144r^3 t^4 \\
&\quad - 1430r^3 t^3 + 1144r^2 s^3 t^4 - 4576r^2 s^3 t^3 + 2860r^2 s^3 t^2 + 8580r^2 s^3 t - 1040r^2 s^2 t^5 + 4680r^2 s^2 t^4 - \\
&\quad + 6864r^2 s^2 t^3 + 2860r^2 s^2 t^2 + 260r^2 st^6 - 1820r^2 st^5 + 4680r^2 st^4 - 4576r^2 st^3 + 260r^2 t^6 - 1040r^2 t^5 \\
&\quad + 1144r^2 t^4 - 260rs^3 t^5 + 1742rs^3 t^4 - 4576rs^3 t^3 + 5005rs^3 t^2 + 260rs^2 t^6 - 1820rs^2 t^5 + 4680rs^2 \\
&\quad + t^4 - 4576rs^2 t^3 - 70rst^7 + 645rst^6 - 1820rst^5 + 1742rst^4 - 70rt^7 + 260rt^6 - 260rt^5 - 260s^3 t^5 \\
&\quad + 1144s^3 t^4 - 1430s^3 t^3 + 260s^2 t^6 - 1040s^2 t^5 + 1144s^2 t^4 - 70st^7 + 260st^6 - 260st^5), \\
B_{416}^{[0]} &= \frac{-h^4}{2162160 r^3 s^3 t^3} (-77220r^3 s^3 t^3 + 8580r^3 s^3 t^2 + 5005r^3 s^3 t - 1430r^3 s^3 + 8580r^3 s^2 t^3 + 2860r^3 s^2 t^2 \\
&\quad - 4576r^3 s^2 t + 1144r^3 s^2 + 5005r^3 st^3 - 4576r^3 st^2 + 1742r^3 st - 260r^3 s - 1430r^3 t^3 + 1144r^3 t^2 - \\
&\quad + 260r^3 t + 8580r^2 s^3 t^3 + 2860r^2 s^3 t^2 - 4576r^2 s^3 t + 1144r^2 s^3 + 2860r^2 s^2 t^3 - 6864r^2 s^2 t^2 + 4680r^2 \\
&\quad + s^2 t - 1040r^2 s^2 - 4576r^2 st^3 + 4680r^2 st^2 - 1820r^2 st + 260r^2 s + 1144r^2 t^3 - 1040r^2 t^2 + 260r^2 t + \\
&\quad + 5005rs^3 t^3 - 4576rs^3 t^2 + 1742rs^3 t - 260rs^3 - 4576rs^2 t^3 + 4680rs^2 t^2 - 1820rs^2 t + 260rs^2 + \\
&\quad + 1742rst^3 - 1820rst^2 + 645rst - 70rs - 260rt^3 + 260rt^2 - 70rt - 1430s^3 t^3 + 1144s^3 t^2 - 260s^3 t \\
&\quad + 1144s^2 t^3 - 1040s^2 t^2 + 260s^2 t - 260st^3 + 260st^2 - 70st), \\
B_{516}^{[0]} &= \frac{-h^3 r^3}{27720 s^3 t^3} (-7r^7 st - 7r^7 s - 7r^7 t + 24r^6 s^2 t + 24r^6 s^2 + 24r^6 st^2 + 59r^6 st + 24r^6 s + 24r^6 t^2 + 24 \\
&\quad + r^6 t - 22r^5 s^3 t - 22r^5 s^3 - 88r^5 s^2 t^2 - 152r^5 s^2 t - 88r^5 s^2 - 22r^5 st^3 - 152r^5 st^2 - 152r^5 st - 22r^5 s \\
&\quad - 22r^5 t^3 - 88r^5 t^2 - 22r^5 t + 88r^4 s^3 t^2 + 132r^4 s^3 t + 88r^4 s^3 + 88r^4 s^2 t^3 + 352r^4 s^2 t^2 + 352r^4 s^2 t + \\
&\quad + 88r^4 s^2 + 132r^4 st^3 + 352r^4 st^2 + 132r^4 st + 88r^4 t^3 + 88r^4 t^2 - 99r^3 s^3 t^3 - 308r^3 s^3 t^2 - 308r^3 s^3 t - \\
&\quad - 99r^3 s^3 - 308r^3 s^2 t^3 - 440r^3 s^2 t^2 - 308r^3 s^2 t - 308r^3 st^3 - 308r^3 st^2 - 99r^3 t^3 + 297r^2 s^3 t^3 + 132 \\
&\quad + r^2 s^3 t^2 + 297r^2 s^3 t + 132r^2 s^2 t^3 + 132r^2 s^2 t^2 + 297r^2 st^3 + 528rs^3 t^3 + 528rs^3 t^2 + 528rs^2 t^3 - \\
&\quad - 3696s^3 t^3),
\end{aligned}$$

$$\begin{aligned}
B_{616}^{[0]} &= \frac{-h^3 s^3}{27720 r^3 t^3} (-22r^3 s^5 t - 22r^3 s^5 + 88r^3 s^4 t^2 + 132r^3 s^4 t + 88r^3 s^4 - 99r^3 s^3 t^3 - 308r^3 s^3 t^2 - 308r^3 s^3 t - 99r^3 s^3 + 297r^3 s^2 t^3 + 132r^3 s^2 t^2 + 297r^3 s^2 t + 528r^3 s t^3 + 528r^3 s t^2 - 3696r^3 t^3 + 24r^2 s^6 t + 24r^2 s^6 - 88r^2 s^5 t^2 - 152r^2 s^5 t - 88r^2 s^5 + 88r^2 s^4 t^3 + 352r^2 s^4 t^2 + 352r^2 s^4 t + 88r^2 s^4 - 308r^2 s^3 t^3 - 440r^2 s^3 t^2 - 308r^2 s^3 t + 132r^2 s^2 t^3 + 132r^2 s^2 t^2 + 528r^2 s t^3 - 7rs^7 t - 7rs^7 + 24rs^6 t^2 + 59rs^6 t + 24rs^6 - 22rs^5 t^3 - 152rs^5 t^2 - 152rs^5 t - 22rs^5 + 132rs^4 t^3 + 352rs^4 t^2 + 132rs^4 t - 308rs^3 t^3 - 308rs^3 t^2 - 227rs^2 t^3 - 7s^7 t + 24s^6 t^2 + 24s^6 t - 22s^5 t^3 - 88s^5 t^2 - 22s^5 t + 88s^4 t^3 + 88s^4 t^2 - 99s^3 t^3), \\
B_{716}^{[0]} &= \frac{-h^3 t^3}{27720 r^3 s^3} (-99r^3 s^3 t^3 + 297r^3 s^3 t^2 + 528r^3 s^3 t - 3696r^3 s^3 + 88r^3 s^2 t^4 - 308r^3 s^2 t^3 + 132r^3 s^2 t^2 + 528r^3 s^2 t - 22r^3 s t^5 + 132r^3 s t^4 - 308r^3 s t^3 + 297r^3 s t^2 - 22r^3 t^5 + 88r^3 t^4 - 99r^3 t^3 + 88r^2 s^3 t^4 - 308r^2 s^3 t^3 + 132r^2 s^3 t^2 + 528r^2 s^3 t - 88r^2 s^2 t^5 + 352r^2 s^2 t^4 - 440r^2 s^2 t^3 + 132r^2 s^2 t^2 + 24r^2 s t^6 - 152r^2 s t^5 + 352r^2 s t^4 - 308r^2 s t^3 + 24r^2 t^6 - 88r^2 t^5 + 88r^2 t^4 - 22rs^3 t^5 + 132rs^3 t^4 - 308rs^3 t^3 + 297rs^3 t^2 + 24rs^2 t^6 - 152rs^2 t^5 + 352rs^2 t^4 - 308rs^2 t^3 - 7rst^7 + 59rst^6 - 152rst^5 + 132rst^4 - 7rt^7 + 24rt^6 - 22rt^5 - 22s^3 t^5 + 88s^3 t^4 - 99s^3 t^3 + 24s^2 t^6 - 88s^2 t^5 + 88s^2 t^4 - 7st^7 + 24st^6 - 22st^5), \\
B_{816}^{[0]} &= \frac{-h^3}{27720 r^3 s^3 t^3} (-3696r^3 s^3 t^3 + 528r^3 s^3 t^2 + 297r^3 s^3 t - 99r^3 s^3 + 528r^3 s^2 t^3 + 132r^3 s^2 t^2 - 308r^3 s^2 t + 88r^3 s^2 + 297r^3 s t^3 - 308r^3 s t^2 + 132r^3 s t - 22r^3 s - 99r^3 t^3 + 88r^3 t^2 - 22r^3 t + 528r^2 s^3 t^3 + 132r^2 s^3 t^2 - 308r^2 s^3 t + 88r^2 s^3 + 132r^2 s^2 t^3 - 440r^2 s^2 t^2 + 352r^2 s^2 t - 88r^2 s^2 - 308r^2 s t^3 + 352r^2 s t^2 - 152r^2 s t + 24r^2 s + 88r^2 t^3 - 88r^2 t^2 + 24r^2 t + 297rs^3 t^3 - 308rs^3 t^2 + 132rs^3 t - 22rs^3 - 308rs^2 t^3 + 352rs^2 t^2 - 152rs^2 t + 24rs^2 + 132rst^3 - 152rst^2 + 59rst - 7rs - 22rt^3 + 24rt^2 - 7rt - 99s^3 t^3 + 88s^3 t^2 - 22s^3 t + 88s^2 t^3 - 88s^2 t^2 + 24s^2 t - 22st^3 + 24st^2 - 7st), \\
B_{916}^{[0]} &= \frac{-h^2 r^2}{27720 s^3 t^3} (-42r^7 s t - 42r^7 s - 42r^7 t + 132r^6 s^2 t + 132r^6 s^2 + 132r^6 s t^2 + 321r^6 s t + 132r^6 s + 132r^6 t^2 + 132r^6 t - 110r^5 s^3 t - 110r^5 s^3 - 440r^5 s^2 t^2 - 748r^5 s^2 t - 440r^5 s^2 - 110r^5 s t^3 - 748r^5 s t^2 - 748r^5 s t - 110r^5 s - 110r^5 t^3 - 440r^5 t^2 - 110r^5 t + 396r^4 s^3 t^2 + 583r^4 s^3 t + 396r^4 s^3 + 396r^4 s^2 t^3 + 1540r^4 s^2 t^2 + 1540r^4 s^2 t + 396r^4 s^2 + 583r^4 s t^3 + 1540r^4 s t^2 + 583r^4 s t + 396r^4 t^3 + 396r^4 t^2 - 396r^3 s^3 t^3 - 1188r^3 s^3 t^2 - 1188r^3 s^3 t - 396r^3 s^3 - 1188r^3 s^2 t^3 - 1584r^3 s^2 t^2 - 1188r^3 s^2 t - 1188r^3 s t^3 - 1188r^3 s t^2 - 396r^3 t^3 + 990r^2 s^3 t^3 + 264r^2 s^3 t^2 + 990r^2 s^3 t + 264r^2 s^2 t^3 + 264r^2 s^2 t^2 + 990r^2 s t^3 + 1848rs^3 t^3 + 1848rs^3 t^2 + 1848rs^2 t^3 - 9702s^3 t^3), \\
B_{1016}^{[0]} &= \frac{-h^2 s^2}{27720 r^3 t^3} (-110r^3 s^5 t - 110r^3 s^5 + 396r^3 s^4 t^2 + 583r^3 s^4 t + 396r^3 s^4 - 396r^3 s^3 t^3 - 1188r^3 s^3 t^2 - 1188r^3 s^3 t - 396r^3 s^3 + 990r^3 s^2 t^3 + 264r^3 s^2 t^2 + 990r^3 s^2 t + 1848r^3 s t^3 + 1848r^3 s t^2 - 9702r^3 t^3 + 132r^2 s^6 t + 132r^2 s^6 - 440r^2 s^5 t^2 - 748r^2 s^5 t - 440r^2 s^5 + 396r^2 s^4 t^3 + 1540r^2 s^4 t^2 + 1540r^2 s^4 t + 396r^2 s^4 - 1188r^2 s^3 t^3 - 1584r^2 s^3 t^2 - 1188r^2 s^3 t + 264r^2 s^2 t^3 + 264r^2 s^2 t^2 + 1848r^2 s t^3 - 42rs^7 t - 42rs^7 + 132rs^6 t^2 + 321rs^6 t + 132rs^6 - 110rs^5 t^3 - 748rs^5 t^2 - 748rs^5 t - 110rs^5 + 583rs^4 t^3 + 1540rs^4 t^2 + 583rs^4 t - 1188rs^3 t^3 - 1188rs^3 t^2 + 990rs^2 t^3 - 42s^7 t + 132s^6 t^2 + 132s^6 t - 110s^5 t^3 - 440s^5 t^2 - 110s^5 t + 396s^4 t^3 + 396s^4 t^2 - 396s^3 t^3), \\
B_{1116}^{[0]} &= \frac{-h^2 t^2}{27720 r^3 s^3} (-396r^3 s^3 t^3 + 990r^3 s^3 t^2 + 1848r^3 s^3 t - 9702r^3 s^3 + 396r^3 s^2 t^4 - 1188r^3 s^2 t^3 + 264r^3 s^2 t^2 + 1848r^3 s^2 t - 110r^3 s t^5 + 583r^3 s t^4 - 1188r^3 s t^3 + 990r^3 s t^2 - 110r^3 t^5 + 396r^3 t^4 - 396r^3 t^3 + 396r^2 s^3 t^4 - 1188r^2 s^3 t^3 + 264r^2 s^3 t^2 + 1848r^2 s^3 t - 440r^2 s^2 t^5 + 1540r^2 s^2 t^4 - 1584r^2 s^2 t^3 + 264r^2 s^2 t^2 + 132r^2 s t^6 - 748r^2 s t^5 + 1540r^2 s t^4 - 1188r^2 s t^3 + 132r^2 t^6 - 440r^2 t^5 + 396r^2 t^4 - 110rs^3 t^5 + 583rs^3 t^4 - 1188rs^3 t^3 + 990rs^3 t^2 + 132rs^2 t^6 - 748rs^2 t^5 + 1540rs^2 t^4 - 1188rs^2 t^3 - 42rst^7 + 321rst^6 - 748rst^5 + 583rst^4 - 42rt^7 + 132rt^6 - 110rt^5 - 110s^3 t^5 + 396s^3 t^4 - 396s^3 t^3 + 132s^2 t^6 - 440s^2 t^5 + 396s^2 t^4 - 42s^7 + 132st^6 - 110st^5), \\
\end{aligned}$$

$$\begin{aligned}
B_{1216}^{[0]} &= \frac{-h^2}{27720r^3s^3t^3} (-9702r^3s^3t^3 + 1848r^3s^3t^2 + 990r^3s^3t - 396r^3s^3 + 1848r^3s^2t^3 + 264r^3s^2t^2 - 1188r^3s^2t + 396r^3s^2 + 990r^3st^3 - 1188r^3st^2 + 583r^3st - 110r^3s - 396r^3t^3 + 396r^3t^2 - 110r^3t + 1848r^2s^3t^3 + 264r^2s^3t^2 - 1188r^2s^3t + 396r^2s^3 + 264r^2s^2t^3 - 1584r^2s^2t^2 + 1540r^2s^2t - 440r^2s^2 - 1188r^2st^3 + 1540r^2st^2 - 748r^2st + 132r^2s + 396r^2t^3 - 440r^2t^2 + 132r^2t + 990rs^3t^3 - 1188rs^3t^2 + 583rs^3t - 110rs^3 - 1188rs^2t^3 + 1540rs^2t^2 - 748rs^2t + 132rs^2 + 583rst^3 - 748rst^2 + 321rst - 42rs - 110rt^3 + 132rt^2 - 42rt - 396s^3t^3 + 396s^3t^2 - 110s^3t + 396s^2t^3 - 440s^2t^2 + 132s^2t - 110st^3 + 132st^2 - 42st), \\
B_{1316}^{[0]} &= \frac{hr}{1260s^3t^3} (7r^7st + 7r^7s + 7r^7t - 20r^6s^2t - 20r^6s^2 - 20r^6st^2 - 48r^6st - 20r^6s - 20r^6t^2 - 20r^6t + 15r^5s^3t + 15r^5s^3 + 60r^5s^2t^2 + 100r^5s^2t + 60r^5s^2 + 15r^5st^3 + 100r^5st^2 + 100r^5st + 15r^5s + 15r^5t^3 + 60r^5t^2 + 15r^5t - 48r^4s^3t^2 - 69r^4s^3t - 48r^4s^3 - 48r^4s^2t^3 - 180r^4s^2t^2 - 180r^4s^2t - 48r^4s^2 - 69r^4st^3 - 180r^4st^2 - 69r^4st - 48r^4t^3 - 48r^4t^2 + 42r^3s^3t^3 + 120r^3s^3t^2 + 120r^3s^3t + 42r^3s^3 + 120r^3s^2t^3 + 144r^3s^2t^2 + 120r^3s^2t + 120r^3st^3 + 120r^3st^2 + 42r^3t^3 - 84r^2s^3t^3 - 84r^2s^3t - 84r^2st^3 - 168rs^3t^3 - 168rs^3t^2 - 168rs^3t + 630s^3t^3), \\
B_{1416}^{[0]} &= \frac{hs}{1260r^3t^3} (15r^3s^5t + 15r^3s^5 - 48r^3s^4t^2 - 69r^3s^4t - 48r^3s^4 + 42r^3s^3t^3 + 120r^3s^3t^2 + 120r^3s^3t + 42r^3s^3 - 84r^3s^2t^3 - 84r^3s^2t - 168r^3st^3 - 168r^3st^2 + 630r^3t^3 - 20r^2s^6t - 20r^2s^6 + 60r^2s^5t^2 + 100r^2s^5t + 60r^2s^5 - 48r^2s^4t^3 - 180r^2s^4t^2 - 180r^2s^4t - 48r^2s^4 + 120r^2s^3t^3 + 144r^2s^3t^2 + 120r^2s^3t - 168r^2st^3 + 7rs^7t + 7rs^7 - 20rs^6t^2 - 48rs^6t - 20rs^6 + 15rs^5t^3 + 100rs^5t^2 + 100rs^5t + 15rs^5 - 69rs^4t^3 - 180rs^4t^2 - 69rs^4t + 120rs^3t^3 + 120rs^3t^2 - 84rs^2t^3 + 7s^7t - 20s^6t^2 - 20s^6t + 15s^5t^3 + 60s^5t^2 + 15s^5t - 48s^4t^3 - 48s^4t^2 + 42s^3t^3), \\
B_{1516}^{[0]} &= \frac{ht}{1260r^3s^3} (42r^3s^3t^3 - 84r^3s^3t^2 - 168r^3s^3t + 630r^3s^3 - 48r^3s^2t^4 + 120r^3s^2t^3 - 168r^3s^2t + 15r^3st^5 - 69r^3st^4 + 120r^3st^3 - 84r^3st^2 + 15r^3t^5 - 48r^3t^4 + 42r^3t^3 - 48r^2s^3t^4 + 120r^2s^3t^3 - 168r^2s^3t + 60r^2s^2t^5 - 180r^2s^2t^4 + 144r^2s^2t^3 - 20r^2st^6 + 100r^2st^5 - 180r^2st^4 + 120r^2st^3 - 20r^2t^6 + 60r^2t^5 - 48r^2t^4 + 15rs^3t^5 - 69rs^3t^4 + 120rs^3t^3 - 84rs^3t^2 - 20rs^2t^6 + 100rs^2t^5 - 180rs^2t^4 + 120rs^2t^3 + 7rst^7 - 48rst^6 + 100rst^5 - 69rst^4 + 7rt^7 - 20rt^6 + 15rt^5 + 15s^3t^5 - 48s^3t^4 + 42s^3t^3 - 20s^2t^6 + 60s^2t^5 - 48s^2t^4 + 7st^7 - 20st^6 + 15st^5), \\
B_{1616}^{[0]} &= \frac{h}{1260r^3s^3t^3} (630r^3s^3t^3 - 168r^3s^3t^2 - 84r^3s^3t + 42r^3s^3 - 168r^3s^2t^3 + 120r^3s^2t - 48r^3s^2 - 84r^3st^3 + 120r^3st^2 - 69r^3st + 15r^3s + 42r^3t^3 - 48r^3t^2 + 15r^3t - 168r^2s^3t^3 + 120r^2s^3t - 48r^2s^3 + 144r^2s^2t^2 - 180r^2s^2t + 60r^2s^2 + 120r^2st^3 - 180r^2st^2 + 100r^2st - 20r^2s - 48r^2t^3 + 60r^2t^2 - 20r^2t - 84rs^3t^3 + 120rs^3t^2 - 69rs^3t + 15rs^3 + 120rs^2t^3 - 180rs^2t^2 + 100rs^2t - 20rs^2 - 69rst^3 + 100rst^2 - 48rst + 7rs + 15rt^3 - 20rt^2 + 7rt + 42s^3t^3 - 48s^3t^2 + 15s^3t - 48s^2t^3 + 60s^2t^2 - 20s^2t + 15st^3 - 20st^2 + 7st), \\
B_{11}^{[1]} &= \frac{h^4r^4}{2162160(r-s)^3(r-t)^3(r-1)^3} (630r^9 - 2520r^8s - 2520r^8t - 2520r^8 + 3315r^7s^2 + 10390r^7st + 10390r^7s + 3315r^7t^2 + 10390r^7t + 3315r^7 - 1365r^6s^3 - 14105r^6s^2t - 14105r^6s^2 - 14105r^6st^2 - 44520r^6st - 14105r^6s - 1365r^6t^3 - 14105r^6t^2 - 14105r^6t - 1365r^6 + 5915r^5s^3t + 5915r^5s^3 + 19799r^5s^2t^2 + 63011r^5s^2t + 19799r^5s^2 + 5915r^5st^3 + 63011r^5st^2 + 63011r^5st + 5915r^5s + 5915r^5t^3 + 19799r^5t^2 + 5915r^5t - 8437r^4s^3t^2 - 27053r^4s^3t - 8437r^4s^3 - 8437r^4s^2t^3 - 93483r^4s^2t^2 - 93483r^4s^2t - 8437r^4s^2 - 27053r^4st^3 - 93483r^4st^2 - 27053r^4st - 8437r^4t^3 - 8437r^4t^2 + 3575r^3s^3t^3 + 41041r^3s^3t^2 + 41041r^3s^3t + 3575r^3s^3 + 41041r^3s^2t^3 + 148434r^3s^2t^2 + 41041r^3s^2t + 41041r^3st^3 + 41041r^3st^2 + 3575r^3t^3 - 17875r^2s^3t^3 - 67210r^2s^3t^2 - 17875r^2s^3t - 67210r^2s^2t^3 - 67210r^2s^2t^2 - 17875r^2st^3 + 30030rs^3t^3 + 30030rs^3t^2 + 30030rs^2t^3 - 12870s^3t^3), \\
\end{aligned}$$

$$\begin{aligned}
B_{21}^{[1]} &= \frac{-h^4 s^8}{2162160r^3(r-s)^3(r-t)^3(r-1)^3} (-585r^4 s^4 + 2340r^4 s^3 t + 2340r^4 s^3 - 2574r^4 s^2 t^2 - 10296r^4 s^2 \\
&\quad t - 2574r^4 s^2 + 12870r^4 s t^2 + 12870r^4 s t - 19305r^4 t^2 + 735r^3 s^5 - 2405r^3 s^4 t - 2405r^3 s^4 + 1222r^3 \\
&\quad s^3 t^2 + 8528r^3 s^3 t + 1222r^3 s^3 + 2002r^3 s^2 t^3 - 4576r^3 s^2 t^2 - 4576r^3 s^2 t + 2002r^3 s^2 - 10010r^3 s t^3 + \\
&\quad 715r^3 s t^2 - 10010r^3 s t + 15015r^3 t^3 + 15015r^3 t^2 - 210r^2 s^6 + 245r^2 s^5 t + 245r^2 s^5 + 1300r^2 s^4 t^2 + \\
&\quad 715r^2 s^4 t + 1300r^2 s^4 - 2210r^2 s^3 t^3 - 6318r^2 s^3 t^2 - 6318r^2 s^3 t - 2210r^2 s^3 + 9152r^2 s^2 t^3 + 11154r^2 \\
&\quad s^2 t^2 + 9152r^2 s^2 t - 7865r^2 s t^3 - 7865r^2 s t^2 - 10725r^2 t^3 + 140r s^6 t + 140r s^6 - 520r s^5 t^2 - 705r s^5 t \\
&\quad - 520r s^5 + 520r s^4 t^3 + 1300r s^4 t^2 + 1300r s^4 t + 520r s^4 - 910r s^3 t^3 + 936r s^3 t^2 - 910r s^3 t - 3718r \\
&\quad s^2 t^3 - 3718r s^2 t^2 + 9295r s t^3 - 70s^6 t + 260s^5 t^2 + 260s^5 t - 260s^4 t^3 - 1040s^4 t^2 - 260s^4 t + 1144s^3 \\
&\quad t^3 + 1144s^3 t^2 - 1430s^2 t^3), \\
B_{31}^{[1]} &= \frac{-h^4 t^8}{2162160r^3(r-s)^3(r-t)^3(r-1)^3} (-2574r^4 s^2 t^2 + 12870r^4 s^2 t - 19305r^4 s^2 + 2340r^4 s t^3 - 10296 \\
&\quad r^4 s t^2 + 12870r^4 s t - 585r^4 t^4 + 2340r^4 t^3 - 2574r^4 t^2 + 2002r^3 s^3 t^2 - 10010r^3 s^3 t + 15015r^3 s^3 + 1222 \\
&\quad r^3 s^2 t^3 - 4576r^3 s^2 t^2 + 715r^3 s^2 t + 15015r^3 s^2 - 2405r^3 s t^4 + 8528r^3 s t^3 - 4576r^3 s t^2 - 10010r^3 s t + \\
&\quad 735r^3 t^5 - 2405r^3 t^4 + 1222r^3 t^3 + 2002r^3 t^2 - 2210r^2 s^3 t^3 + 9152r^2 s^3 t^2 - 7865r^2 s^3 t - 10725r^2 s^3 + \\
&\quad 1300r^2 s^2 t^4 - 6318r^2 s^2 t^3 + 11154r^2 s^2 t^2 - 7865r^2 s^2 t + 245r^2 s t^5 + 715r^2 s t^4 - 6318r^2 s t^3 + 9152r^2 \\
&\quad s t^2 - 210r^2 t^6 + 245r^2 t^5 + 1300r^2 t^4 - 2210r^2 t^3 + 520r s^3 t^4 - 910r s^3 t^3 - 3718r s^3 t^2 + 9295r s^3 t \\
&\quad - 520r s^2 t^5 + 1300r s^2 t^4 + 936r s^2 t^3 - 3718r s^2 t^2 + 140r s t^6 - 705r s t^5 + 1300r s t^4 - 910r s t^3 + \\
&\quad 140r t^6 - 520r t^5 + 520r t^4 - 260s^3 t^4 + 1144s^3 t^3 - 1430s^3 t^2 + 260s^2 t^5 - 1040s^2 t^4 + 1144s^2 t^3 - \\
&\quad 70s t^6 + 260s t^5 - 260s t^4), \\
B_{41}^{[1]} &= \frac{-h^4}{2162160r^3(r-s)^3(r-t)^3(r-1)^3} (-19305r^4 s^2 t^2 + 12870r^4 s^2 t - 2574r^4 s^2 + 12870r^4 s t^2 - \\
&\quad 10296r^4 s t + 2340r^4 s - 2574r^4 t^2 + 2340r^4 t - 585r^4 + 15015r^3 s^3 t^2 - 10010r^3 s^3 t + 2002r^3 s^3 + \\
&\quad 15015r^3 s^2 t^3 + 715r^3 s^2 t^2 - 4576r^3 s^2 t + 1222r^3 s^2 - 10010r^3 s t^3 - 4576r^3 s t^2 + 8528r^3 s t - 2405 \\
&\quad r^3 s + 2002r^3 t^3 + 1222r^3 t^2 - 2405r^3 t + 735r^3 - 10725r^2 s^3 t^3 - 7865r^2 s^3 t^2 + 9152r^2 s^3 t - 2210 \\
&\quad r^2 s^3 - 7865r^2 s^2 t^3 + 11154r^2 s^2 t^2 - 6318r^2 s^2 t + 1300r^2 s^2 + 9152r^2 s t^3 - 6318r^2 s t^2 + 715r^2 s t + \\
&\quad 245r^2 s - 2210r^2 t^3 + 1300r^2 t^2 + 245r^2 t - 210r^2 + 9295r s^3 t^3 - 3718r s^3 t^2 - 910r s^3 t + 520r s^3 - \\
&\quad 3718r s^2 t^3 + 936r s^2 t^2 + 1300r s^2 t - 520r s^2 - 910r s t^3 + 1300r s t^2 - 705r s t + 140r s + 520r t^3 - \\
&\quad 520r t^2 + 140r t - 1430s^3 t^3 + 1144s^3 t^2 - 260s^3 t + 1144s^2 t^3 - 1040s^2 t^2 + 260s^2 t - 260s t^3 + \\
&\quad 260s t^2 - 70s t), \\
B_{51}^{[1]} &= \frac{h^3 r^3}{27720(r-s)^3(r-t)^3(r-1)^3} (84r^9 - 315r^8 s - 315r^8 t - 315r^8 + 390r^7 s^2 + 1210r^7 s t + 1210r^7 \\
&\quad s + 390r^7 t^2 + 1210r^7 t + 390r^7 - 154r^6 s^3 - 1536r^6 s^2 t - 1536r^6 s^2 - 1536r^6 s t^2 - 4793r^6 s t - 1536 \\
&\quad r^6 s - 154r^6 t^3 - 1536r^6 t^2 - 1536r^6 t - 154r^6 + 616r^5 s^3 t + 616r^5 s^3 + 2002r^5 s^2 t^2 + 6290r^5 s^2 t + \\
&\quad 2002r^5 s^2 + 616r^5 s t^3 + 6290r^5 s t^2 + 6290r^5 s t + 616r^5 s + 616r^5 t^3 + 2002r^5 t^2 + 616r^5 t - 814r^4 s^3 \\
&\quad t^2 - 2574r^4 s^3 t - 814r^4 s^3 - 814r^4 s^2 t^3 - 8569r^4 s^2 t^2 - 8569r^4 s^2 t - 814r^4 s^2 - 2574r^4 s t^3 - 8569r^4 \\
&\quad s t^2 - 2574r^4 s t - 814r^4 t^3 - 814r^4 t^2 + 330r^3 s^3 t^3 + 3575r^3 s^3 t^2 + 3575r^3 s^3 t + 330r^3 s^3 + 3575r^3 s^2 \\
&\quad t^3 + 12320r^3 s^2 t^2 + 3575r^3 s^2 t + 3575r^3 s^2 + 3575r^3 s t^2 + 330r^3 t^3 - 1485r^2 s^3 t^3 - 5280r^2 s^3 t^2 - \\
&\quad 1485r^2 s^3 t - 5280r^2 s^2 t^3 - 5280r^2 s^2 t^2 - 1485r^2 s^2 t + 2244r s^3 t^3 + 2244r s^3 t^2 + 2244r s^2 t^3 - 924s^3 t^3), \\
B_{61}^{[1]} &= \frac{h^3 s^7}{27720r^3(r-s)^3(r-t)^3(r-1)^3} (54r^4 s^4 - 198r^4 s^3 t - 198r^4 s^3 + 198r^4 s^2 t^2 + 792r^4 s^2 t + 198r^4 s^2 \\
&\quad - 891r^4 s t^2 - 891r^4 s t + 1188r^4 t^2 - 70r^3 s^5 + 208r^3 s^4 t + 208r^3 s^4 - 88r^3 s^3 t^2 - 660r^3 s^3 t - 88r^3 s^3 \\
&\quad - 154r^3 s^2 t^3 + 275r^3 s^2 t^2 + 275r^3 s^2 t - 154r^3 s^2 + 693r^3 s t^3 + 66r^3 s t^2 + 693r^3 s t - 924r^3 t^3 - 924r^3 \\
&\quad t^2 + 21r^2 s^6 - 21r^2 s^5 t - 21r^2 s^5 - 116r^2 s^4 t^2 - 70r^2 s^4 t - 116r^2 s^4 + 176r^2 s^3 t^3 + 506r^2 s^3 t^2 + 506 \\
&\quad r^2 s^3 t + 176r^2 s^3 - 649r^2 s^2 t^3 - 781r^2 s^2 t^2 - 649r^2 s^2 t + 462r^2 s^2 t^3 + 462r^2 s^2 t^2 + 660r^2 t^3 - 14r s^6 t \\
&\quad - 14r s^6 + 48r s^5 t^2 + 64r s^5 t + 48r s^5 - 44r s^4 t^3 - 106r s^4 t^2 - 106r s^4 t - 44r s^4 + 66r s^3 t^3 - 88r s^3 t^2
\end{aligned}$$

$$\begin{aligned}
& +66rs^3t + 275rs^2t^3 + 275rs^2t^2 - 594rst^3 + 7s^6t - 24s^5t^2 - 24s^5t + 22s^4t^3 + 88s^4t^2 + 22s^4t - \\
& 88s^3t^3 - 88s^3t^2 + 99s^2t^3) , \\
B_{71}^{[1]} &= \frac{h^3t^7}{27720r^3(r-s)^3(r-t)^3(r-1)^3} (198r^4s^2t^2 - 891r^4s^2t + 1188r^4s^2 - 198r^4st^3 + 792r^4st^2 - 891r^4 \\
& st + 54r^4t^4 - 198r^4t^3 + 198r^4t^2 - 154r^3s^3t^2 + 693r^3s^3t - 924r^3s^3 - 88r^3s^2t^3 + 275r^3s^2t^2 + 66r^3 \\
& s^2t - 924r^3s^2 + 208r^3st^4 - 660r^3st^3 + 275r^3st^2 + 693r^3st - 70r^3t^5 + 208r^3t^4 - 88r^3t^3 - 154r^3t^2 \\
& + 176r^2s^3t^3 - 649r^2s^3t^2 + 462r^2s^3t + 660r^2s^3 - 116r^2s^2t^4 + 506r^2s^2t^3 - 781r^2s^2t^2 + 462r^2s^2t - \\
& 21r^2st^5 - 70r^2st^4 + 506r^2st^3 - 649r^2st^2 + 21r^2t^6 - 21r^2t^5 - 116r^2t^4 + 176r^2t^3 - 44rs^3t^4 + 66r \\
& s^3t^3 + 275rs^3t^2 - 594rs^3t + 48rs^2t^5 - 106rs^2t^4 - 88rs^2t^3 + 275rs^2t^2 - 14rst^6 + 64rst^5 - 106rs \\
& t^4 + 66rst^3 - 14rt^6 + 48rt^5 - 44rt^4 + 22s^3t^4 - 88s^3t^3 + 99s^3t^2 - 24s^2t^5 + 88s^2t^4 - 88s^2t^3 + 7s \\
& t^6 - 24st^5 + 22st^4) , \\
B_{81}^{[1]} &= \frac{-h^3}{27720r^3(r-s)^3(r-t)^3(r-1)^3} (-1188r^4s^2t^2 + 891r^4s^2t - 198r^4s^2 + 891r^4st^2 - 792r^4st + 198 \\
& r^4s - 198r^4t^2 + 198r^4t - 54r^4 + 924r^3s^3t^2 - 693r^3s^3t + 154r^3s^3 + 924r^3s^2t^3 - 66r^3s^2t^2 - 275r^3 \\
& s^2t + 88r^3s^2 - 693r^3st^3 - 275r^3st^2 + 660r^3st - 208r^3s + 154r^3t^3 + 88r^3t^2 - 208r^3t + 70r^3 - 660 \\
& r^2s^3t^3 - 462r^2s^3t^2 + 649r^2s^3t - 176r^2s^3 - 462r^2s^2t^3 + 781r^2s^2t^2 - 506r^2s^2t + 116r^2s^2 + 649r^2s \\
& t^3 - 506r^2st^2 + 70r^2st + 21r^2s - 176r^2t^3 + 116r^2t^2 + 21r^2t - 21r^2 + 594rs^3t^3 - 275rs^3t^2 - 66rs^3 \\
& t + 44rs^3 - 275rs^2t^3 + 88rs^2t^2 + 106rs^2t - 48rs^2 - 66rst^3 + 106rst^2 - 64rst + 14rs + 44rt^3 - 48 \\
& rt^2 + 14rt - 99s^3t^3 + 88s^3t^2 - 22s^3t + 88s^2t^3 - 88s^2t^2 + 24s^2t - 22st^3 + 24st^2 - 7st) , \\
B_{91}^{[1]} &= \frac{h^2r^2}{27720(r-s)^3(r-t)^3(r-1)^3} (756r^9 - 2646r^8s - 2646r^8t - 2646r^8 + 3069r^7s^2 + 9420r^7st + \\
& 9420r^7s + 3069r^7t^2 + 9420r^7t + 3069r^7 - 1155r^6s^3 - 11121r^6s^2t - 11121r^6s^2 - 11121r^6st^2 - \\
& 34278r^6st - 11121r^6s - 1155r^6t^3 - 11121r^6t^2 - 11121r^6t - 1155r^6 + 4235r^5s^3t + 4235r^5s^3 + \\
& 13376r^5s^2t^2 + 41437r^5s^2t + 13376r^5s^2 + 4235r^5st^3 + 41437r^5st^2 + 41437r^5st + 4235r^5s + \\
& 4235r^5t^3 + 13376r^5t^2 + 4235r^5t - 5148r^4s^3t^2 - 16027r^4s^3t - 5148r^4s^3 - 5148r^4s^2t^3 - 51436 \\
& r^4s^2t^2 - 51436r^4s^2t - 5148r^4s^2 - 16027r^4st^3 - 51436r^4st^2 - 16027r^4st - 5148r^4t^3 - 5148r^4 \\
& t^2 + 1980r^3s^3t^3 + 20196r^3s^3t^2 + 20196r^3s^3t + 1980r^3s^3 + 20196r^3s^2t^3 + 66330r^3s^2t^2 + 20196 \\
& r^3s^2t + 20196r^3st^3 + 20196r^3st^2 + 1980r^3t^3 - 7920r^2s^3t^3 - 26598r^2s^3t^2 - 7920r^2s^3t - 26598 \\
& r^2s^2t^3 - 26598r^2s^2t^2 - 7920r^2st^3 + 10626rs^3t^3 + 10626rs^3t^2 + 10626rs^2t^3 - 4158s^3t^3) , \\
B_{101}^{[1]} &= \frac{h^2s^6}{27720r^3(r-s)^3(r-t)^3(r-1)^3} (297r^4s^4 - 990r^4s^3t - 990r^4s^3 + 891r^4s^2t^2 + 3564r^4s^2t + 891 \\
& r^4s^2 - 3564r^4st^2 - 3564r^4st + 4158r^4t^2 - 399r^3s^5 + 1067r^3s^4t + 1067r^3s^4 - 363r^3s^3t^2 - 2992 \\
& r^3s^3t - 363r^3s^3 - 693r^3s^2t^3 + 891r^3s^2t^2 + 891r^3s^2t - 693r^3s^2 + 2772r^3st^3 + 726r^3st^2 + 2772 \\
& r^3st - 3234r^3t^3 - 3234r^3t^2 + 126r^2s^6 - 105r^2s^5t - 105r^2s^5 - 616r^2s^4t^2 - 407r^2s^4t - 616r^2s^4 \\
& + 825r^2s^3t^3 + 2387r^2s^3t^2 + 2387r^2s^3t + 825r^2s^3 - 2673r^2s^2t^3 - 3168r^2s^2t^2 - 2673r^2s^2t + 1518 \\
& r^2st^3 + 1518r^2st^2 + 2310r^2t^3 - 84rs^6t - 84rs^6 + 264rs^5t^2 + 345rs^5t + 264rs^5 - 220rs^4t^3 - 506 \\
& rs^4t^2 - 506rs^4t - 220rs^4 + 275rs^3t^3 - 484rs^3t^2 + 275rs^3t + 1188rs^2t^3 + 1188rs^2t^2 - 2178rst^3 \\
& + 42s^6t - 132s^5t^2 - 132s^5t + 110s^4t^3 + 440s^4t^2 + 110s^4t - 396s^3t^3 - 396s^3t^2 + 396s^2t^3) , \\
B_{111}^{[1]} &= \frac{h^2t^6}{27720r^3(r-s)^3(r-t)^3(r-1)^3} (891r^4s^2t^2 - 3564r^4s^2t + 4158r^4s^2 - 990r^4st^3 + 3564r^4st^2 - 3564 \\
& r^4st + 297r^4t^4 - 990r^4t^3 + 891r^4t^2 - 693r^3s^3t^2 + 2772r^3s^3t - 3234r^3s^3 - 363r^3s^2t^3 + 891r^3s^2t^2 \\
& + 726r^3s^2t - 3234r^3s^2 + 1067r^3st^4 - 2992r^3st^3 + 891r^3st^2 + 2772r^3st - 399r^3t^5 + 1067r^3t^4 - 363 \\
& r^3t^3 - 693r^3t^2 + 825r^2s^3t^3 - 2673r^2s^3t^2 + 1518r^2s^3t + 2310r^2s^3 - 616r^2s^2t^4 + 2387r^2s^2t^3 - 3168 \\
& r^2s^2t^2 + 1518r^2s^2t - 105r^2st^5 - 407r^2st^4 + 2387r^2st^3 - 2673r^2st^2 + 126r^2t^6 - 105r^2t^5 - 616r^2t^4 \\
& + 825r^2t^3 - 220rs^3t^4 + 275rs^3t^3 + 1188rs^3t^2 - 2178rs^3t + 264rs^2t^5 - 506rs^2t^4 - 484rs^2t^3 + 1188 \\
& rs^2t^2 - 84rst^6 + 345rst^5 - 506rst^4 + 275rst^3 - 84rt^6 + 264rt^5 - 220rt^4 + 110s^3t^4 - 396s^3t^3 +
\end{aligned}$$



$$\begin{aligned}
& 396s^3t^2 - 132s^2t^5 + 440s^2t^4 - 396s^2t^3 + 42st^6 - 132st^5 + 110st^4) , \\
B_{121}^{[1]} &= \frac{-h^2}{27720r^3(r-s)^3(r-t)^3(r-1)^3} (-4158r^4s^2t^2 + 3564r^4s^2t - 891r^4s^2 + 3564r^4st^2 - 3564r^4st + \\
& 990r^4s - 891r^4t^2 + 990r^4t - 297r^4 + 3234r^3s^3t^2 - 2772r^3s^3t + 693r^3s^3 + 3234r^3s^2t^3 - 726r^3s^2 \\
& t^2 - 891r^3s^2t + 363r^3s^2 - 2772r^3st^3 - 891r^3st^2 + 2992r^3st - 1067r^3s + 693r^3t^3 + 363r^3t^2 - \\
& 1067r^3t + 399r^3 - 2310r^2s^3t^3 - 1518r^2s^3t^2 + 2673r^2s^3t - 825r^2s^3 - 1518r^2s^2t^3 + 3168r^2s^2t^2 - \\
& 2387r^2s^2t + 616r^2s^2 + 2673r^2st^3 - 2387r^2st^2 + 407r^2st + 105r^2s - 825r^2t^3 + 616r^2t^2 + 105r^2t - \\
& 126r^2 + 2178rs^3t^3 - 1188rs^3t^2 - 275rs^3t + 220rs^3 - 1188rs^2t^3 + 484rs^2t^2 + 506rs^2t - 264rs^2 - \\
& 275rst^3 + 506rst^2 - 345rst + 84rs + 220rt^3 - 264rt^2 + 84rt - 396s^3t^3 + 396s^3t^2 - 110s^3t + 396 \\
& s^2t^3 - 440s^2t^2 + 132s^2t - 110st^3 + 132st^2 - 42st) , \\
B_{131}^{[1]} &= \frac{hr}{1260(r-s)^3(r-t)^3(r-1)^3} (252r^9 - 819r^8s - 819r^8t - 819r^8 + 885r^7s^2 + 2686r^7st + 2686r^7s \\
& + 885r^7t^2 + 2686r^7t + 885r^7 - 315r^6s^3 - 2930r^6s^2t - 2930r^6s^2 - 2930r^6st^2 - 8913r^6st - 2930r^6 \\
& s - 315r^6t^3 - 2930r^6t^2 - 2930r^6t - 315r^6 + 1050r^5s^3t + 1050r^5s^3 + 3228r^5s^2t^2 + 9847r^5s^2t + \\
& 3228r^5s^2 + 1050r^5st^3 + 9847r^5st^2 + 9847r^5st + 1050r^5s + 1050r^5t^3 + 3228r^5t^2 + 1050r^5t - 1164 \\
& r^4s^3t^2 - 3561r^4s^3t - 1164r^4s^3 - 1164r^4s^2t^3 - 11034r^4s^2t^2 - 11034r^4s^2t - 1164r^4s^2 - 3561r^4st^3 \\
& - 11034r^4st^2 - 3561r^4st - 1164r^4t^3 - 1164r^4t^2 + 420r^3s^3t^3 + 4026r^3s^3t^2 + 4026r^3s^3t + 420r^3s^3 \\
& + 4026r^3s^2t^3 + 12618r^3s^2t^2 + 4026r^3s^2t + 4026r^3st^3 + 4026r^3st^2 + 420r^3t^3 - 1470r^2s^3t^3 - 4662 \\
& r^2s^3t^2 - 1470r^2s^3t - 4662r^2s^2t^3 - 4662r^2s^2t^2 - 1470r^2st^3 + 1722rs^3t^3 + 1722rs^3t^2 + 1722rs^2t^3 \\
& - 630s^3t^3) , \\
B_{141}^{[1]} &= \frac{hs^5}{1260r^3(r-s)^3(r-t)^3(r-1)^3} (45r^4s^4 - 135r^4s^3t - 135r^4s^3 + 108r^4s^2t^2 + 432r^4s^2t + 108r^4s^2 - \\
& 378r^4st^2 - 378r^4st + 378r^4t^2 - 63r^3s^5 + 150r^3s^4t + 150r^3s^4 - 39r^3s^3t^2 - 366r^3s^3t - 39r^3s^3 - 84 \\
& r^3s^2t^3 + 66r^3s^2t^2 + 66r^3s^2t - 84r^3s^2 + 294r^3st^3 + 126r^3st^2 + 294r^3st - 294r^3t^3 - 294r^3t^2 + \\
& 21r^2s^6 - 14r^2s^5t - 14r^2s^5 - 90r^2s^4t^2 - 65r^2s^4t - 90r^2s^4 + 105r^2s^3t^3 + 306r^2s^3t^2 + 306r^2s^3 \\
& t + 105r^2s^3 - 294r^2s^2t^3 - 342r^2s^2t^2 - 294r^2s^2t + 126r^2st^3 + 126r^2st^2 + 210r^2t^3 - 14rs^6t - \\
& 14rs^6 + 40rs^5t^2 + 51rs^5t + 40rs^5 - 30rs^4t^3 - 65rs^4t^2 - 65rs^4t - 30rs^4 + 30rs^3t^3 - 72rs^3t^2 \\
& + 30rs^3t + 138rs^2t^3 + 138rs^2t^2 - 210rst^3 + 7s^6t - 20s^5t^2 - 20s^5t + 15s^4t^3 + 60s^4t^2 + 15s^4t \\
& - 48s^3t^3 - 48s^3t^2 + 42s^2t^3) , \\
B_{151}^{[1]} &= \frac{ht^5}{1260r^3(r-s)^3(r-t)^3(r-1)^3} (108r^4s^2t^2 - 378r^4s^2t + 378r^4s^2 - 135r^4st^3 + 432r^4st^2 - 378 \\
& r^4st + 45r^4t^4 - 135r^4t^3 + 108r^4t^2 - 84r^3s^3t^2 + 294r^3s^3t - 294r^3s^3 - 39r^3s^2t^3 + 66r^3s^2t^2 + \\
& 126r^3s^2t - 294r^3s^2 + 150r^3st^4 - 366r^3st^3 + 66r^3st^2 + 294r^3st - 63r^3t^5 + 150r^3t^4 - 39r^3t^3 - \\
& 84r^3t^2 + 105r^2s^3t^3 - 294r^2s^3t^2 + 126r^2s^3t + 210r^2s^3 - 90r^2s^2t^4 + 306r^2s^2t^3 - 342r^2s^2t^2 + \\
& 126r^2s^2t - 14r^2st^5 - 65r^2st^4 + 306r^2st^3 - 294r^2st^2 + 21r^2t^6 - 14r^2t^5 - 90r^2t^4 + 105r^2t^3 - \\
& 30rs^4t^4 + 30rs^3t^3 + 138rs^3t^2 - 210rs^3t + 40rs^2t^5 - 65rs^2t^4 - 72rs^2t^3 + 138rs^2t^2 - 14rst^6 + \\
& 51rst^5 - 65rst^4 + 30rst^3 - 14rt^6 + 40rt^5 - 30rt^4 + 15s^3t^4 - 48s^3t^3 + 42s^3t^2 - 20s^2t^5 + 60s^2 \\
& t^4 - 48s^2t^3 + 7st^6 - 20st^5 + 15st^4) , \\
B_{161}^{[1]} &= \frac{-h}{1260r^3(r-s)^3(r-t)^3(r-1)^3} (-378r^4s^2t^2 + 378r^4s^2t - 108r^4s^2 + 378r^4st^2 - 432r^4st + 135 \\
& r^4s - 108r^4t^2 + 135r^4t - 45r^4 + 294r^3s^3t^2 - 294r^3s^3t + 84r^3s^3 + 294r^3s^2t^3 - 126r^3s^2t^2 - 66 \\
& r^3s^2t + 39r^3s^2 - 294r^3st^3 - 66r^3st^2 + 366r^3st - 150r^3s + 84r^3t^3 + 39r^3t^2 - 150r^3t + 63r^3 - \\
& 210r^2s^3t^3 - 126r^2s^3t^2 + 294r^2s^3t - 105r^2s^3 - 126r^2s^2t^3 + 342r^2s^2t^2 - 306r^2s^2t + 90r^2s^2 + 294 \\
& r^2st^3 - 306r^2st^2 + 65r^2st + 14r^2s - 105r^2t^3 + 90r^2t^2 + 14r^2t - 21r^2 + 210rs^3t^3 - 138rs^3t^2 - \\
& 30rs^3t + 30rs^3 - 138rs^2t^3 + 72rs^2t^2 + 65rs^2t - 40rs^2 - 30rst^3 + 65rst^2 - 51rst + 14rs + 30rt^3 \\
& - 40rt^2 + 14rt - 42s^3t^3 + 48s^3t^2 - 15s^3t + 48s^2t^3 - 60s^2t^2 + 20s^2t - 15st^3 + 20st^2 - 7st) ,
\end{aligned}$$

$$\begin{aligned}
B_{12}^{[1]} &= \frac{h^4 r^8}{2162160 s^3 (r-s)^3 (s-t)^3 (s-1)^3} (-210r^6 s^2 + 140r^6 st + 140r^6 s - 70r^6 t + 735r^5 s^3 + 245r^5 s^2 t \\
&\quad + 245r^5 s^2 - 520r^5 st^2 - 705r^5 st - 520r^5 s + 260r^5 t^2 + 260r^5 t - 585r^4 s^4 - 2405r^4 s^3 t - 2405r^4 s^3 \\
&\quad + 1300r^4 s^2 t^2 + 715r^4 s^2 t + 1300r^4 s^2 + 520r^4 st^3 + 1300r^4 st^2 + 1300r^4 s + 520r^4 t^3 - 260r^4 t^3 - \\
&\quad 1040r^4 t^2 - 260r^4 t + 2340r^3 s^4 t + 2340r^3 s^4 + 1222r^3 s^3 t^2 + 8528r^3 s^3 t + 1222r^3 s^3 - 2210r^3 s^2 t^3 \\
&\quad - 6318r^3 s^2 t^2 - 6318r^3 s^2 t - 2210r^3 s^2 - 910r^3 st^3 + 936r^3 st^2 - 910r^3 st + 1144r^3 t^3 + 1144r^3 t^2 \\
&\quad - 2574r^2 s^4 t^2 - 10296r^2 s^4 t - 2574r^2 s^4 + 2002r^2 s^3 t^3 - 4576r^2 s^3 t^2 - 4576r^2 s^3 t + 2002r^2 s^3 + \\
&\quad 9152r^2 s^2 t^3 + 11154r^2 s^2 t^2 + 9152r^2 s^2 t - 3718r^2 st^3 - 3718r^2 st^2 - 1430r^2 t^3 + 12870r^4 t^2 + \\
&\quad 12870rs^4 t - 10010rs^3 t^3 + 715rs^3 t^2 - 10010rs^3 t - 7865rs^2 t^3 - 7865rs^2 t^2 + 9295rst^3 - 19305 \\
&\quad s^4 t^2 + 15015s^3 t^3 + 15015s^3 t^2 - 10725s^2 t^3), \\
B_{22}^{[1]} &= \frac{h^4 s^4}{2162160 (r-s)^3 (s-t)^3 (s-1)^3} (1365r^3 s^6 - 5915r^3 s^5 t - 5915r^3 s^5 + 8437r^3 s^4 t^2 + 27053r^3 s^4 t \\
&\quad + 8437r^3 s^4 - 3575r^3 s^3 t^3 - 41041r^3 s^3 t^2 - 41041r^3 s^3 t - 3575r^3 s^3 + 17875r^3 s^2 t^3 + 67210r^3 s^2 t^2 \\
&\quad + 17875r^3 s^2 t - 30030r^3 st^3 - 30030r^3 st^2 + 12870r^3 t^3 - 3315r^2 s^7 + 14105r^2 s^6 t + 14105r^2 s^6 - \\
&\quad 19799r^2 s^5 t^2 - 63011r^2 s^5 t - 19799r^2 s^5 + 8437r^2 s^4 t^3 + 93483r^2 s^4 t^2 + 93483r^2 s^4 t + 8437r^2 s^4 - \\
&\quad 41041r^2 s^3 t^3 - 148434r^2 s^3 t^2 - 41041r^2 s^3 t + 67210r^2 s^2 t^3 + 67210r^2 s^2 t^2 - 30030r^2 st^3 + 2520rs^8 \\
&\quad - 10390rs^7 t - 10390rs^7 + 14105rs^6 t^2 + 44520rs^6 t + 14105rs^6 - 5915rs^5 t^3 - 63011rs^5 t^2 - \\
&\quad 63011rs^5 t - 5915rs^5 + 27053rs^4 t^3 + 93483rs^4 t^2 + 27053rs^4 t - 41041rs^3 t^3 - 41041rs^3 t^2 + 17875 \\
&\quad rs^2 t^3 - 630s^9 + 2520s^8 t + 2520s^8 - 3315s^7 t^2 - 10390s^7 t - 3315s^7 + 1365s^6 t^3 + 14105s^6 t^2 + \\
&\quad 14105s^6 t + 1365s^6 - 5915s^5 t^3 - 19799s^5 t^2 - 5915s^5 t + 8437s^4 t^3 + 8437s^4 t^2 - 3575s^3 t^3), \\
B_{32}^{[1]} &= \frac{h^4 t^8}{2162160 s^3 (r-s)^3 (s-t)^3 (s-1)^3} (2002r^3 s^3 t^2 - 10010r^3 s^3 t + 15015r^3 s^3 - 2210r^3 s^2 t^3 + 9152r^3 \\
&\quad s^2 t^2 - 7865r^3 s^2 t - 10725r^3 s^2 + 520r^3 st^4 - 910r^3 st^3 - 3718r^3 st^2 + 9295r^3 st - 260r^3 t^4 + 1144r^3 \\
&\quad t^3 - 1430r^3 t^2 - 2574r^2 s^4 t^2 + 12870r^2 s^4 t - 19305r^2 s^4 + 1222r^2 s^3 t^3 - 4576r^2 s^3 t^2 + 715r^2 s^3 t + \\
&\quad 15015r^2 s^3 + 1300r^2 s^2 t^4 - 6318r^2 s^2 t^3 + 11154r^2 s^2 t^2 - 7865r^2 s^2 t - 520r^2 st^5 + 1300r^2 st^4 + 936 \\
&\quad r^2 st^3 - 3718r^2 st^2 + 260r^2 t^5 - 1040r^2 t^4 + 1144r^2 t^3 + 2340rs^4 t^3 - 10296rs^4 t^2 + 12870rs^4 t - 2405 \\
&\quad rs^3 t^4 + 8528rs^3 t^3 - 4576rs^3 t^2 - 10010rs^3 t + 245rs^2 t^5 + 715rs^2 t^4 - 6318rs^2 t^3 + 9152rs^2 t^2 + \\
&\quad 140rst^6 - 705rst^5 + 1300rst^4 - 910rst^3 - 70rt^6 + 260rt^5 - 260rt^4 - 585s^4 t^4 + 2340s^4 t^3 - \\
&\quad 2574s^4 t^2 + 735s^3 t^5 - 2405s^3 t^4 + 1222s^3 t^3 + 2002s^3 t^2 - 210s^2 t^6 + 245s^2 t^5 + 1300s^2 t^4 - 2210 \\
&\quad s^2 t^3 + 140st^6 - 520st^5 + 520st^4), \\
B_{42}^{[1]} &= \frac{h^4}{2162160 s^3 (r-s)^3 (s-t)^3 (s-1)^3} (15015r^3 s^3 t^2 - 10010r^3 s^3 t + 2002r^3 s^3 - 10725r^3 s^2 t^3 - \\
&\quad 7865r^3 s^2 t^2 + 9152r^3 s^2 t - 2210r^3 s^2 + 9295r^3 st^3 - 3718r^3 st^2 - 910r^3 st + 520r^3 s - 1430r^3 \\
&\quad t^3 + 1144r^3 t^2 - 260r^3 t - 19305r^2 s^4 t^2 + 12870r^2 s^4 t - 2574r^2 s^4 + 15015r^2 s^3 t^3 + 715r^2 s^3 t^2 \\
&\quad - 4576r^2 s^3 t + 1222r^2 s^3 - 7865r^2 s^2 t^3 + 11154r^2 s^2 t^2 - 6318r^2 s^2 t + 1300r^2 s^2 - 3718r^2 st^3 + \\
&\quad 936r^2 st^2 + 1300r^2 st - 520r^2 s + 1144r^2 t^3 - 1040r^2 t^2 + 260r^2 t + 12870rs^4 t^2 - 10296rs^4 t + \\
&\quad 2340rs^4 - 10010rs^3 t^3 - 4576rs^3 t^2 + 8528rs^3 t - 2405rs^3 + 9152rs^2 t^3 - 6318rs^2 t^2 + 715rs^2 \\
&\quad t + 245rs^2 - 910rst^3 + 1300rst^2 - 705rst + 140rs - 260rt^3 + 260rt^2 - 70rt - 2574s^4 t^2 + \\
&\quad 2340s^4 t - 585s^4 + 2002s^3 t^3 + 1222s^3 t^2 - 2405s^3 t + 735s^3 - 2210s^2 t^3 + 1300s^2 t^2 + 245s^2 \\
&\quad t - 210s^2 + 520st^3 - 520st^2 + 140st), \\
B_{52}^{[1]} &= \frac{h^3 r^7}{27720 s^3 (r-s)^3 (s-t)^3 (s-1)^3} (-21r^6 s^2 + 14r^6 st + 14r^6 s - 7r^6 t + 70r^5 s^3 + 21r^5 s^2 t + 21 \\
&\quad r^5 s^2 - 48r^5 st^2 - 64r^5 st - 48r^5 s + 24r^5 t^2 + 24r^5 t - 54r^4 s^4 - 208r^4 s^3 t - 208r^4 s^3 + 116r^4 s^2 \\
&\quad t^2 + 70r^4 s^2 t + 116r^4 s^2 + 44r^4 st^3 + 106r^4 st^2 + 106r^4 st + 44r^4 s - 22r^4 t^3 - 88r^4 t^2 - 22r^4 t \\
&\quad + 198r^3 s^4 t + 198r^3 s^4 + 88r^3 s^3 t^2 + 660r^3 s^3 t + 88r^3 s^3 - 176r^3 s^2 t^3 - 506r^3 s^2 t^2 - 506r^3 s^2 t \\
&\quad - 176r^3 s^2 - 66r^3 st^3 + 88r^3 st^2 - 66r^3 st + 88r^3 t^3 + 88r^3 t^2 - 198r^2 s^4 t^2 - 792r^2 s^4 t - 198r^2
\end{aligned}$$

$$\begin{aligned}
& s^4 + 154r^2s^3t^3 - 275r^2s^3t^2 - 275r^2s^3t + 154r^2s^3 + 649r^2s^2t^3 + 781r^2s^2t^2 + 649r^2s^2t - 275 \\
& r^2st^3 - 275r^2st^2 - 99r^2t^3 + 891rs^4t^2 + 891rs^4t - 693rs^3t^3 - 66rs^3t^2 - 693rs^3t - 462rs^2t^3 \\
& - 462rs^2t^2 + 594rst^3 - 1188s^4t^2 + 924s^3t^3 + 924s^3t^2 - 660s^2t^3) , \\
B_{62}^{[1]} &= \frac{h^3s^3}{27720(r-s)^3(s-t)^3(s-1)^3} (154r^3s^6 - 616r^3s^5t - 616r^3s^5 + 814r^3s^4t^2 + 2574r^3s^4t + 814 \\
& r^3s^4 - 330r^3s^3t^3 - 3575r^3s^3t^2 - 3575r^3s^3t - 330r^3s^3 + 1485r^3s^2t^3 + 5280r^3s^2t^2 + 1485r^3s^2 \\
& t - 2244r^3st^3 - 2244r^3st^2 + 924r^3t^3 - 390r^2s^7 + 1536r^2s^6t + 1536r^2s^6 - 2002r^2s^5t^2 - 6290 \\
& r^2s^5t - 2002r^2s^5 + 814r^2s^4t^3 + 8569r^2s^4t^2 + 8569r^2s^4t + 814r^2s^4 - 3575r^2s^3t^3 - 12320r^2s^3 \\
& t^2 - 3575r^2s^3t + 5280r^2s^2t^3 + 5280r^2s^2t^2 - 2244r^2st^3 + 315rs^8 - 1210rs^7t - 1210rs^7 + 1536 \\
& rs^6t^2 + 4793rs^6t + 1536rs^6 - 616rs^5t^3 - 6290rs^5t^2 - 6290rs^5t - 616rs^5 + 2574rs^4t^3 + 8569 \\
& rs^4t^2 + 2574rs^4t - 3575rs^3t^3 - 3575rs^3t^2 + 1485rs^2t^3 - 84s^9 + 315s^8t + 315s^8 - 390s^7t^2 - \\
& 1210s^7t - 390s^7 + 154s^6t^3 + 1536s^6t^2 + 1536s^6t + 154s^6 - 616s^5t^3 - 2002s^5t^2 - 616s^5t + 814 \\
& s^4t^3 + 814s^4t^2 - 330s^3t^3) , \\
B_{72}^{[1]} &= \frac{h^3t^7}{27720s^3(r-s)^3(s-t)^3(s-1)^3} (154r^3s^3t^2 - 693r^3s^3t + 924r^3s^3 - 176r^3s^2t^3 + 649r^3s^2t^2 - \\
& 462r^3s^2t - 660r^3s^2 + 44r^3st^4 - 66r^3st^3 - 275r^3st^2 + 594r^3st - 22r^3t^4 + 88r^3t^3 - 99r^3t^2 - \\
& 198r^2s^4t^2 + 891r^2s^4t - 1188r^2s^4 + 88r^2s^3t^3 - 275r^2s^3t^2 - 66r^2s^3t + 924r^2s^3 + 116r^2s^2t^4 \\
& - 506r^2s^2t^3 + 781r^2s^2t^2 - 462r^2s^2t - 48r^2st^5 + 106r^2st^4 + 88r^2st^3 - 275r^2st^2 + 24r^2t^5 - 88 \\
& r^2t^4 + 88r^2t^3 + 198rs^4t^3 - 792rs^4t^2 + 891rs^4t - 208rs^3t^4 + 660rs^3t^3 - 275rs^3t^2 - 693rs^3t + \\
& 21rs^2t^5 + 70rs^2t^4 - 506rs^2t^3 + 649rs^2t^2 + 14rst^6 - 64rst^5 + 106rst^4 - 66rst^3 - 7rt^6 + 24rt^5 \\
& - 22rt^4 - 54s^4t^4 + 198s^4t^3 - 198s^4t^2 + 70s^3t^5 - 208s^3t^4 + 88s^3t^3 + 154s^3t^2 - 21s^2t^6 + 21s^2t^5 \\
& + 116s^2t^4 - 176s^2t^3 + 14st^6 - 48st^5 + 44st^4) , \\
B_{82}^{[1]} &= \frac{h^3}{27720s^3(r-s)^3(s-t)^3(s-1)^3} (924r^3s^3t^2 - 693r^3s^3t + 154r^3s^3 - 660r^3s^2t^3 - 462r^3s^2t^2 + \\
& 649r^3s^2t - 176r^3s^2 + 594r^3st^3 - 275r^3st^2 - 66r^3st + 44r^3s - 99r^3t^3 + 88r^3t^2 - 22r^3t - 1188 \\
& r^2s^4t^2 + 891r^2s^4t - 198r^2s^4 + 924r^2s^3t^3 - 66r^2s^3t^2 - 275r^2s^3t + 88r^2s^3 - 462r^2s^2t^3 + 781r^2 \\
& s^2t^2 - 506r^2s^2t + 116r^2s^2 - 275r^2st^3 + 88r^2st^2 + 106r^2st - 48r^2s + 88r^2t^3 - 88r^2t^2 + 24r^2t \\
& + 891rs^4t^2 - 792rs^4t + 198rs^4 - 693rs^3t^3 - 275rs^3t^2 + 660rs^3t - 208rs^3 + 649rs^2t^3 - 506rs^2 \\
& t^2 + 70rs^2t + 21rs^2 - 66rst^3 + 106rst^2 - 64rst + 14rs - 22rt^3 + 24rt^2 - 7rt - 198s^4t^2 + 198 \\
& s^4t - 54s^4 + 154s^3t^3 + 88s^3t^2 - 208s^3t + 70s^3 - 176s^2t^3 + 116s^2t^2 + 21s^2t - 21s^2 + 44st^3 - \\
& 48st^2 + 14st) , \\
B_{92}^{[1]} &= \frac{h^2r^6}{27720s^3(r-s)^3(s-t)^3(s-1)^3} (-126r^6s^2 + 84r^6st + 84r^6s - 42r^6t + 399r^5s^3 + 105r^5s^2t + \\
& 105r^5s^2 - 264r^5st^2 - 345r^5st - 264r^5s + 132r^5t^2 + 132r^5t - 297r^4s^4 - 1067r^4s^3t - 1067r^4s^3 \\
& + 616r^4s^2t^2 + 407r^4s^2t + 616r^4s^2 + 220r^4st^3 + 506r^4st^2 + 506r^4st + 220r^4s - 110r^4t^3 - 440 \\
& r^4t^2 - 110r^4t + 990r^3s^4t + 990r^3s^4 + 363r^3s^3t^2 + 2992r^3s^3t + 363r^3s^3 - 825r^3s^2t^3 - 2387r^3 \\
& s^2t^2 - 2387r^3s^2t - 825r^3s^2 - 275r^3st^3 + 484r^3st^2 - 275r^3st + 396r^3t^3 + 396r^3t^2 - 891r^2s^4t^2 \\
& - 3564r^2s^4t - 891r^2s^4 + 693r^2s^3t^3 - 891r^2s^3t^2 - 891r^2s^3t + 693r^2s^3 + 2673r^2s^2t^3 + 3168r^2 \\
& s^2t^2 + 2673r^2s^2t - 1188r^2st^3 - 1188r^2st^2 - 396r^2t^3 + 3564rs^4t^2 + 3564rs^4t - 2772rs^3t^3 - \\
& 726rs^3t^2 - 2772rs^3t - 1518rs^2t^3 - 1518rs^2t^2 + 2178rst^3 - 4158s^4t^2 + 3234s^3t^3 + 3234s^3t^2 - \\
& 2310s^2t^3) , \\
B_{102}^{[1]} &= \frac{h^2s^2}{27720(r-s)^3(s-t)^3(s-1)^3} (1155r^3s^6 - 4235r^3s^5t - 4235r^3s^5 + 5148r^3s^4t^2 + 16027r^3s^4t \\
& + 5148r^3s^4 - 1980r^3s^3t^3 - 20196r^3s^3t^2 - 20196r^3s^3t - 1980r^3s^3 + 7920r^3s^2t^3 + 26598r^3s^2t^2 \\
& + 7920r^3s^2t - 10626r^3st^3 - 10626r^3st^2 + 4158r^3t^3 - 3069r^2s^7 + 11121r^2s^6t + 11121r^2s^6 - \\
& 13376r^2s^5t^2 - 41437r^2s^5t - 13376r^2s^4t^3 + 5148r^2s^4t^2 + 51436r^2s^4t + 5148r^2s^4
\end{aligned}$$

$$\begin{aligned}
& -20196r^2s^3t^3 - 66330r^2s^3t^2 - 20196r^2s^3t + 26598r^2s^2t^3 + 26598r^2s^2t^2 - 10626r^2st^3 + 2646rs^8 - 9420rs^7t - 9420rs^7 + 11121rs^6t^2 + 34278rs^6t + 11121rs^6 - 4235rs^5t^3 - 41437rs^5t^2 - 41437rs^5t - 4235rs^5 + 16027rs^4t^3 + 51436rs^4t^2 + 16027rs^4t - 20196rs^3t^3 - 20196rs^3t^2 + 7920rs^2t^3 - 756s^9 + 2646s^8t + 2646s^8 - 3069s^7t^2 - 9420s^7t - 3069s^7 + 1155s^6t^3 + 11121s^6t^2 + 11121s^6t + 1155s^6 - 4235s^5t^3 - 13376s^5t^2 - 4235s^5t + 5148s^4t^3 + 5148s^4t^2 - 1980s^3t^3), \\
B_{112}^{[1]} &= \frac{h^2t^6}{27720s^3(r-s)^3(s-t)^3(s-1)^3} (693r^3s^3t^2 - 2772r^3s^3t + 3234r^3s^3 - 825r^3s^2t^3 + 2673r^3s^2t^2 - 1518r^3s^2t - 2310r^3s^2 + 220r^3st^4 - 275r^3st^3 - 1188r^3st^2 + 2178r^3st - 110r^3t^4 + 396r^3t^3 - 396r^3t^2 - 891r^2s^4t^2 + 3564r^2s^4t - 4158r^2s^4 + 363r^2s^3t^3 - 891r^2s^3t^2 - 726r^2s^3t + 3234r^2s^3 + 616r^2s^2t^4 - 2387r^2s^2t^3 + 3168r^2s^2t^2 - 1518r^2s^2t - 264r^2st^5 + 506r^2st^4 + 484r^2st^3 - 1188r^2st^2 + 132r^2t^5 - 440r^2t^4 + 396r^2t^3 + 990rs^4t^3 - 3564rs^4t^2 + 3564rs^4t - 1067rs^3t^4 + 2992rs^3t^3 - 891rs^3t^2 - 2772rs^3t + 105rs^2t^5 + 407rs^2t^4 - 2387rs^2t^3 + 2673rs^2t^2 + 84rst^6 - 345rst^5 + 506rst^4 - 275rst^3 - 42rt^6 + 132rt^5 - 110rt^4 - 297s^4t^4 + 990s^4t^3 - 891s^4t^2 + 399s^3t^5 - 1067s^3t^4 + 363s^3t^3 + 693s^3t^2 - 126s^2t^6 + 105s^2t^5 + 616s^2t^4 - 825s^2t^3 + 84st^6 - 264st^5 + 220st^4), \\
B_{122}^{[1]} &= \frac{h^2}{27720s^3(r-s)^3(s-t)^3(s-1)^3} (3234r^3s^3t^2 - 2772r^3s^3t + 693r^3s^3 - 2310r^3s^2t^3 - 1518r^3s^2t^2 + 2673r^3s^2t - 825r^3s^2 + 2178r^3st^3 - 1188r^3st^2 - 275r^3st + 220r^3s - 396r^3t^3 + 396r^3t^2 - 110r^3t - 4158r^2s^4t^2 + 3564r^2s^4t - 891r^2s^4 + 3234r^2s^3t^3 - 726r^2s^3t^2 - 891r^2s^3t + 363r^2s^3 - 1518r^2s^2t^3 + 3168r^2s^2t^2 - 2387r^2s^2t + 616r^2s^2 - 1188r^2st^3 + 484r^2st^2 + 506r^2st - 264r^2s + 396r^2t^3 - 440r^2t^2 + 132r^2t + 3564rs^4t^2 - 3564rs^4t + 990rs^4 - 2772rs^3t^3 - 891rs^3t^2 + 2992rs^3t - 1067rs^3 + 2673rs^2t^3 - 2387rs^2t^2 + 407rs^2t + 105rs^2 - 275rst^3 + 506rst^2 - 345rst + 84rs - 110rt^3 + 132rt^2 - 42rt - 891s^4t^2 + 990s^4t - 297s^4 + 693s^3t^3 + 363s^3t^2 - 1067s^3t + 399s^3 - 825s^2t^3 + 616s^2t^2 + 105s^2t - 126s^2 + 220st^3 - 264st^2 + 84st), \\
B_{132}^{[1]} &= \frac{hr^5}{1260s^3(r-s)^3(s-t)^3(s-1)^3} (-21r^6s^2 + 14r^6st + 14r^6s - 7r^6t + 63r^5s^3 + 14r^5s^2t + 14r^5s^2 - 40r^5st^2 - 51r^5st - 40r^5s + 20r^5t^2 + 20r^5t - 45r^4s^4 - 150r^4s^3t - 150r^4s^3 + 90r^4s^2t^2 + 65r^4s^2t + 90r^4s^2 + 30r^4st^3 + 65r^4st^2 + 65r^4st + 30r^4s - 15r^4t^3 - 60r^4t^2 - 15r^4t + 135r^3s^4t + 135r^3s^4 + 39r^3s^3t^2 + 366r^3s^3t + 39r^3s^3 - 105r^3s^2t^3 - 306r^3s^2t^2 - 306r^3s^2t - 105r^3s^2 - 30r^3st^3 + 72r^3st^2 - 30r^3st + 48r^3t^3 + 48r^3t^2 - 108r^2s^4t^2 - 432r^2s^4t - 108r^2s^4 + 84r^2s^3t^3 - 66r^2s^3t^2 - 66r^2s^3t + 84r^2s^3 + 294r^2s^2t^3 + 342r^2s^2t^2 + 294r^2s^2t - 138r^2st^3 - 138r^2st^2 - 42r^2t^3 + 378rs^4t^2 + 378rs^4t - 294rs^3t^3 - 126rs^3t^2 - 294rs^3t - 126rs^2t^3 - 126rs^2t^2 + 210rst^3 - 378s^4t^2 + 294s^3t^3 + 294s^3t^2 - 210s^2t^3), \\
B_{142}^{[1]} &= \frac{hs}{1260(r-s)^3(s-t)^3(s-1)^3} (315r^3s^6 - 1050r^3s^5t - 1050r^3s^5 + 1164r^3s^4t^2 + 3561r^3s^4t + 1164r^3s^4 - 420r^3s^3t^3 - 4026r^3s^3t^2 - 4026r^3s^3t - 420r^3s^3 + 1470r^3s^2t^3 + 4662r^3s^2t^2 + 1470r^3s^2t - 1722r^3st^3 - 1722r^3st^2 + 630r^3t^3 - 885r^2s^7 + 2930r^2s^6t + 2930r^2s^6 - 3228r^2s^5t^2 - 9847r^2s^5t - 3228r^2s^5 + 1164r^2s^4t^3 + 11034r^2s^4t^2 + 11034r^2s^4t + 1164r^2s^4 - 4026r^2s^3t^3 - 12618r^2s^3t^2 - 4026r^2s^3t + 4662r^2s^2t^3 + 4662r^2s^2t^2 - 1722r^2st^3 + 819rs^8 - 2686rs^7t - 2686rs^7 + 2930rs^6t^2 + 8913rs^6t + 2930rs^6 - 1050rs^5t^3 - 9847rs^5t^2 - 9847rs^5t - 1050rs^5 + 3561rs^4t^3 + 11034rs^4t^2 + 3561rs^4t - 4026rs^3t^3 - 4026rs^3t^2 + 1470rs^2t^3 - 252s^9 + 819s^8t + 819s^8 - 885s^7t^2 - 2686s^7t - 885s^7 + 315s^6t^3 + 2930s^6t^2 + 2930s^6t + 315s^6 - 1050s^5t^3 - 3228s^5t^2 - 1050s^5t + 1164s^4t^3 + 1164s^4t^2 - 420s^3t^3), \\
B_{152}^{[1]} &= \frac{ht^5}{1260s^3(r-s)^3(s-t)^3(s-1)^3} (84r^3s^3t^2 - 294r^3s^3t + 294r^3s^3 - 105r^3s^2t^3 + 294r^3s^2t^2 - 126r^3s^2t - 210r^3s^2 + 30r^3st^4 - 30r^3st^3 - 138r^3st^2 + 210r^3st - 15r^3t^4 + 48r^3t^3 - 42r^3t^2 - 108
\end{aligned}$$

$$r^2 s^4 t^2 + 378r^2 s^4 t - 378r^2 s^4 + 39r^2 s^3 t^3 - 66r^2 s^3 t^2 - 126r^2 s^3 t + 294r^2 s^3 + 90r^2 s^2 t^4 - 306r^2 s^2 t^3 + 342r^2 s^2 t^2 - 126r^2 s^2 t - 40r^2 s t^5 + 65r^2 s t^4 + 72r^2 s t^3 - 138r^2 s t^2 + 20r^2 t^5 - 60r^2 t^4 + 48r^2 t^3 + 135r s^4 t^3 - 432r s^4 t^2 + 378r s^4 t - 150r s^3 t^4 + 366r s^3 t^3 - 66r s^3 t^2 - 294r s^3 t + 14r s^2 t^5 + 65r s^2 t^4 - 306r s^2 t^3 + 294r s^2 t^2 + 14r s t^6 - 51r s t^5 + 65r s t^4 - 30r s t^3 - 7r t^6 + 20r t^5 - 15r t^4 - 45s^4 t^4 + 135s^4 t^3 - 108s^4 t^2 + 63s^3 t^5 - 150s^3 t^4 + 39s^3 t^3 + 84s^3 t^2 - 21s^2 t^6 + 14s^2 t^5 + 90s^2 t^4 - 105s^2 t^3 + 14s t^6 - 40s t^5 + 30s t^4),$$

$$B_{162}^{[1]} = \frac{h}{1260s^3(r-s)^3(s-t)^3(s-1)^3} (294r^3 s^3 t^2 - 294r^3 s^3 t + 84r^3 s^3 - 210r^3 s^2 t^3 - 126r^3 s^2 t^2 + 294r^3 s^2 t - 105r^3 s^2 + 210r^3 s t^3 - 138r^3 s t^2 - 30r^3 s t + 30r^3 s - 42r^3 t^3 + 48r^3 t^2 - 15r^3 t - 378r^2 s^4 t^2 + 378r^2 s^4 t - 108r^2 s^4 + 294r^2 s^3 t^3 - 126r^2 s^3 t^2 - 66r^2 s^3 t + 39r^2 s^3 - 126r^2 s^2 t^3 + 342r^2 s^2 t^2 - 306r^2 s^2 t + 90r^2 s^2 - 138r^2 s t^3 + 72r^2 s t^2 + 65r^2 s t - 40r^2 s + 48r^2 t^3 - 60r^2 t^2 + 20r^2 t + 378r s^4 t^2 - 432r s^4 t + 135r s^4 - 294r s^3 t^3 - 66r s^3 t^2 + 366r s^3 t - 150r s^3 + 294r s^2 t^3 - 306r s^2 t^2 + 65r s^2 t + 14r s^2 - 30r s t^3 + 65r s t^2 - 51r s t + 14r s - 15r t^3 + 20r t^2 - 7r t - 108s^4 t^2 + 135s^4 t - 45s^4 + 84s^3 t^3 + 39s^3 t^2 - 150s^3 t + 63s^3 - 105s^2 t^3 + 90s^2 t^2 + 14s^2 t - 21s^2 + 30s t^3 - 40s t^2 + 14s t),$$

$$B_{13}^{[1]} = \frac{-h^4 r^8}{2162160t^3(r-t)^3(s-t)^3(t-1)^3} (140r^6 s t - 70r^6 s - 210r^6 t^2 + 140r^6 t - 520r^5 s^2 t + 260r^5 s^2 + 245r^5 s t^2 - 705r^5 s t + 260r^5 s + 735r^5 t^3 + 245r^5 t^2 - 520r^5 t + 520r^4 s^3 t - 260r^4 s^3 + 1300r^4 s^2 t^2 + 1300r^4 s^2 t - 1040r^4 s^2 - 2405r^4 s t^3 + 715r^4 s t^2 + 1300r^4 s t - 260r^4 s - 585r^4 t^4 - 2405r^4 t^3 + 1300r^4 t^2 + 520r^4 t - 2210r^3 s^3 t^2 - 910r^3 s^3 t + 1144r^3 s^3 + 1222r^3 s^2 t^3 - 6318r^3 s^2 t^2 + 936r^3 s^2 t + 1144r^3 s^2 + 2340r^3 s t^4 + 8528r^3 s t^3 - 6318r^3 s t^2 - 910r^3 s t + 2340r^3 t^4 + 1222r^3 t^3 - 2210r^3 t^2 + 2002r^2 s^3 t^3 + 9152r^2 s^3 t^2 - 3718r^2 s^3 t - 1430r^2 s^3 - 2574r^2 s^2 t^4 - 4576r^2 s^2 t^3 + 11154r^2 s^2 t^2 - 3718r^2 s^2 t - 10296r^2 s t^4 - 4576r^2 s t^3 + 9152r^2 s t^2 - 2574r^2 t^4 + 2002r^2 t^3 - 10010r s^3 t^3 - 7865r s^3 t^2 + 9295r s^3 t + 12870r s^2 t^4 + 715r s^2 t^3 - 7865r s^2 t^2 + 12870r s t^4 - 10010r s t^3 + 15015s^3 t^3 - 10725s^3 t^2 - 19305s^2 t^4 + 15015s^2 t^3),$$

$$B_{23}^{[1]} = \frac{-h^4 s^8}{2162160t^3(r-t)^3(s-t)^3(t-1)^3} (520r^3 s^4 t - 260r^3 s^4 - 2210r^3 s^3 t^2 - 910r^3 s^3 t + 1144r^3 s^3 + 2002r^3 s^2 t^3 + 9152r^3 s^2 t^2 - 3718r^3 s^2 t - 1430r^3 s^2 - 10010r^3 s t^3 - 7865r^3 s t^2 + 9295r^3 s t + 15015r^3 t^3 - 10725r^3 t^2 - 520r^3 s^5 t + 260r^3 s^5 + 1300r^3 s^4 t^2 + 1300r^3 s^4 t - 1040r^3 s^4 + 1222r^3 s^3 t^3 - 6318r^3 s^3 t^2 + 936r^3 s^3 t + 1144r^3 s^3 - 2574r^3 s^2 t^4 - 4576r^3 s^2 t^3 + 11154r^3 s^2 t^2 - 3718r^3 s^2 t + 12870r^3 s t^4 + 715r^3 s t^3 - 7865r^3 s t^2 - 19305r^3 t^4 + 15015r^2 t^3 + 140r^2 s^6 t - 70r^2 s^6 + 245r^2 s^5 t^2 - 705r^2 s^5 t + 260r^2 s^5 - 2405r^2 s^4 t^3 + 715r^2 s^4 t^2 + 1300r^2 s^4 t - 260r^2 s^4 + 2340r^2 s^3 t^4 + 8528r^2 s^3 t^3 - 6318r^2 s^3 t^2 - 910r^2 s^3 t - 10296r^2 s^2 t^4 - 4576r^2 s^2 t^3 + 9152r^2 s^2 t^2 + 12870r^2 s t^4 - 10010r^2 s t^3 - 210s^6 t^2 + 140s^6 t + 735s^5 t^3 + 245s^5 t^2 - 520s^5 t - 585s^4 t^4 - 2405s^4 t^3 + 1300s^4 t^2 + 520s^4 t + 2340s^3 t^4 + 1222s^3 t^3 - 2210s^3 t^2 - 2574s^2 t^4 + 2002s^2 t^3),$$

$$B_{33}^{[1]} = \frac{-h^4 t^4}{2162160(r-t)^3(s-t)^3(t-1)^3} (-3575r^3 s^3 t^3 + 17875r^3 s^3 t^2 - 30030r^3 s^3 t + 12870r^3 s^3 + 8437r^3 s^2 t^4 - 41041r^3 s^2 t^3 + 67210r^3 s^2 t^2 - 30030r^3 s^2 t - 5915r^3 s t^5 + 27053r^3 s t^4 - 41041r^3 s t^3 + 17875r^3 s t^2 + 1365r^3 t^6 - 5915r^3 t^5 + 8437r^3 t^4 - 3575r^3 t^3 + 8437r^2 s^3 t^4 - 41041r^2 s^3 t^3 + 67210r^2 s^3 t^2 - 30030r^2 s^3 t - 19799r^2 s^2 t^5 + 93483r^2 s^2 t^4 - 148434r^2 s^2 t^3 + 67210r^2 s^2 t^2 + 14105r^2 s t^6 - 63011r^2 s t^5 + 93483r^2 s t^4 - 41041r^2 s t^3 - 3315r^2 t^7 + 14105r^2 t^6 - 19799r^2 t^5 + 8437r^2 t^4 - 5915r s^3 t^5 + 27053r s^3 t^4 - 41041r s^3 t^3 + 17875r s^3 t^2 + 14105r s^2 t^6 - 63011r s^2 t^5 + 93483r s^2 t^4 - 41041r s^2 t^3 - 10390r s t^7 + 44520r s t^6 - 63011r s t^5 + 27053r s t^4 + 2520r t^8 - 10390r t^7 + 14105r t^6 - 5915r t^5 + 1365s^3 t^6 - 5915s^3 t^5 + 8437s^3 t^4 - 3575s^3 t^3 - 3315s^2 t^7 + 14105s^2 t^6 - 19799s^2 t^5 + 8437s^2 t^4 + 2520s t^8 - 10390s t^7 + 14105s t^6 - 5915s t^5 - 630t^9 + 2520t^8 - 3315t^7 + 1365t^6),$$

$$B_{43}^{[1]} = \frac{-h^4}{2162160t^3(r-t)^3(s-t)^3(t-1)^3} (-10725r^3 s^3 t^2 + 9295r^3 s^3 t - 1430r^3 s^3 + 15015r^3 s^2 t^3 - 7865$$

$$\begin{aligned}
& r^3 s^2 t^2 - 3718 r^3 s^2 t + 1144 r^3 s^2 - 10010 r^3 s t^3 + 9152 r^3 s t^2 - 910 r^3 s t - 260 r^3 s + 2002 r^3 t^3 - 2210 \\
& r^3 t^2 + 520 r^3 t + 15015 r^2 s^3 t^3 - 7865 r^2 s^3 t^2 - 3718 r^2 s^3 t + 1144 r^2 s^3 - 19305 r^2 s^2 t^4 + 715 r^2 s^2 t^3 + \\
& 11154 r^2 s^2 t^2 + 936 r^2 s^2 t - 1040 r^2 s^2 + 12870 r^2 s t^4 - 4576 r^2 s t^3 - 6318 r^2 s t^2 + 1300 r^2 s t + 260 r^2 s \\
& - 2574 r^2 t^4 + 1222 r^2 t^3 + 1300 r^2 t^2 - 520 r^2 t - 10010 r s^3 t^3 + 9152 r s^3 t^2 - 910 r s^3 t - 260 r s^3 + 12870 \\
& r s^2 t^4 - 4576 r s^2 t^3 - 6318 r s^2 t^2 + 1300 r s^2 t + 260 r s^2 - 10296 r s t^4 + 8528 r s t^3 + 715 r s t^2 - 705 r s t - \\
& 70 r s + 2340 r t^4 - 2405 r t^3 + 245 r t^2 + 140 r t + 2002 s^3 t^3 - 2210 s^3 t^2 + 520 s^3 t - 2574 s^2 t^4 + 1222 s^2 \\
& t^3 + 1300 s^2 t^2 - 520 s^2 t + 2340 s t^4 - 2405 s t^3 + 245 s t^2 + 140 s t - 585 t^4 + 735 t^3 - 210 t^2), \\
B_{53}^{[1]} &= \frac{h^3 r^7}{27720 t^3 (r-t)^3 (s-t)^3 (t-1)^3} (-14 r^6 s t + 7 r^6 s + 21 r^6 t^2 - 14 r^6 t + 48 r^5 s^2 t - 24 r^5 s^2 - 21 r^5 s t^2 + \\
& 64 r^5 s t - 24 r^5 s - 70 r^5 t^3 - 21 r^5 t^2 + 48 r^5 t - 44 r^4 s^3 t + 22 r^4 s^3 - 116 r^4 s^2 t^2 - 106 r^4 s^2 t + 88 r^4 s^2 + \\
& 208 r^4 s t^3 - 70 r^4 s t^2 - 106 r^4 s t + 22 r^4 s + 54 r^4 t^4 + 208 r^4 t^3 - 116 r^4 t^2 - 44 r^4 t + 176 r^3 s^3 t^2 + 66 r^3 s^3 \\
& t - 88 r^3 s^3 - 88 r^3 s^2 t^3 + 506 r^3 s^2 t^2 - 88 r^3 s^2 t - 88 r^3 s^2 - 198 r^3 s t^4 - 660 r^3 s t^3 + 506 r^3 s t^2 + 66 r^3 s t \\
& - 198 r^3 t^4 - 88 r^3 t^3 + 176 r^3 t^2 - 154 r^2 s^3 t^3 - 649 r^2 s^3 t^2 + 275 r^2 s^3 t + 99 r^2 s^3 + 198 r^2 s^2 t^4 + 275 r^2 s^2 \\
& t^3 - 781 r^2 s^2 t^2 + 275 r^2 s^2 t + 792 r^2 s t^4 + 275 r^2 s t^3 - 649 r^2 s t^2 + 198 r^2 t^4 - 154 r^2 t^3 + 693 r s^3 t^3 + 462 \\
& r s^3 t^2 - 594 r s^3 t - 891 r s^2 t^4 + 66 r s^2 t^3 + 462 r s^2 t^2 - 891 r s t^4 + 693 r s t^3 - 924 s^3 t^3 + 660 s^3 t^2 + 1188 \\
& s^2 t^4 - 924 s^2 t^3), \\
B_{63}^{[1]} &= \frac{-h^3 s^7}{27720 t^3 (r-t)^3 (s-t)^3 (t-1)^3} (44 r^3 s^4 t - 22 r^3 s^4 - 176 r^3 s^3 t^2 - 66 r^3 s^3 t + 88 r^3 s^3 + 154 r^3 s^2 t^3 + \\
& 649 r^3 s^2 t^2 - 275 r^3 s^2 t - 99 r^3 s^2 - 693 r^3 s t^3 - 462 r^3 s t^2 + 594 r^3 s t + 924 r^3 t^3 - 660 r^3 t^2 - 48 r^2 s^5 t + \\
& 24 r^2 s^5 + 116 r^2 s^4 t^2 + 106 r^2 s^4 t - 88 r^2 s^4 + 88 r^2 s^3 t^3 - 506 r^2 s^3 t^2 + 88 r^2 s^3 t + 88 r^2 s^3 - 198 r^2 s^2 t^4 - \\
& 275 r^2 s^2 t^3 + 781 r^2 s^2 t^2 - 275 r^2 s^2 t + 891 r^2 s t^4 - 66 r^2 s t^3 - 462 r^2 s t^2 - 1188 r^2 t^4 + 924 r^2 t^3 + 14 r s^6 \\
& t - 7 r s^6 + 21 r s^5 t^2 - 64 r s^5 t + 24 r s^5 - 208 r s^4 t^3 + 70 r s^4 t^2 + 106 r s^4 t - 22 r s^4 + 198 r s^3 t^4 + 660 r s^3 \\
& t^3 - 506 r s^3 t^2 - 66 r s^3 t - 792 r s^2 t^4 - 275 r s^2 t^3 + 649 r s^2 t^2 + 891 r s t^4 - 693 r s t^3 - 21 s^6 t^2 + 14 s^6 t + \\
& 70 s^5 t^3 + 21 s^5 t^2 - 48 s^5 t - 54 s^4 t^4 - 208 s^4 t^3 + 116 s^4 t^2 + 44 s^4 t + 198 s^3 t^4 + 88 s^3 t^3 - 176 s^3 t^2 - 198 \\
& s^2 t^4 + 154 s^2 t^3), \\
B_{73}^{[1]} &= \frac{-h^3 t^3}{27720 (r-t)^3 (s-t)^3 (t-1)^3} (-330 r^3 s^3 t^3 + 1485 r^3 s^3 t^2 - 2244 r^3 s^3 t + 924 r^3 s^3 + 814 r^3 s^2 t^4 - 3575 \\
& r^3 s^2 t^3 + 5280 r^3 s^2 t^2 - 2244 r^3 s^2 t - 616 r^3 s t^5 + 2574 r^3 s t^4 - 3575 r^3 s t^3 + 1485 r^3 s t^2 + 154 r^3 t^6 - 616 \\
& r^3 t^5 + 814 r^3 t^4 - 330 r^3 t^3 + 814 r^2 s^3 t^4 - 3575 r^2 s^3 t^3 + 5280 r^2 s^3 t^2 - 2244 r^2 s^3 t - 2002 r^2 s^2 t^5 + 8569 \\
& r^2 s^2 t^4 - 12320 r^2 s^2 t^3 + 5280 r^2 s^2 t^2 + 1536 r^2 s t^6 - 6290 r^2 s t^5 + 8569 r^2 s t^4 - 3575 r^2 s t^3 - 390 r^2 t^7 + \\
& 1536 r^2 t^6 - 2002 r^2 t^5 + 814 r^2 t^4 - 616 r s^3 t^5 + 2574 r s^3 t^4 - 3575 r s^3 t^3 + 1485 r s^3 t^2 + 1536 r s t^6 - 6290 \\
& r s^2 t^5 + 8569 r s^2 t^4 - 3575 r s^2 t^3 - 1210 r s t^7 + 4793 r s t^6 - 6290 r s t^5 + 2574 r s t^4 + 315 r t^8 - 1210 r t^7 + \\
& 1536 r t^6 - 616 r t^5 + 154 s^3 t^6 - 616 s^3 t^5 + 814 s^3 t^4 - 330 s^3 t^3 - 390 s^2 t^7 + 1536 s^2 t^6 - 2002 s^2 t^5 + 814 s^2 \\
& t^4 + 315 s t^8 - 1210 s t^7 + 1536 s t^6 - 616 s t^5 - 84 t^9 + 315 t^8 - 390 t^7 + 154 t^6), \\
B_{83}^{[1]} &= \frac{h^3}{27720 t^3 (r-t)^3 (s-t)^3 (t-1)^3} (660 r^3 s^3 t^2 - 594 r^3 s^3 t + 99 r^3 s^3 - 924 r^3 s^2 t^3 + 462 r^3 s^2 t^2 + 275 r^3 s^2 t \\
& - 88 r^3 s^2 + 693 r^3 s t^3 - 649 r^3 s t^2 + 66 r^3 s t + 22 r^3 s - 154 r^3 t^3 + 176 r^3 t^2 - 44 r^3 t - 924 r^2 s^3 t^3 + 462 r^2 s^3 \\
& t^2 + 275 r^2 s^3 t - 88 r^2 s^3 + 1188 r^2 s^2 t^4 + 66 r^2 s^2 t^3 - 781 r^2 s^2 t^2 - 88 r^2 s^2 t + 88 r^2 s^2 - 891 r^2 s t^4 + 275 r^2 \\
& s t^3 + 506 r^2 s t^2 - 106 r^2 s t - 24 r^2 s + 198 r^2 t^4 - 88 r^2 t^3 - 116 r^2 t^2 + 48 r^2 t + 693 r s^3 t^3 - 649 r s^3 t^2 + 66 r \\
& s^3 t + 22 r s^3 - 891 r s^2 t^4 + 275 r s^2 t^3 + 506 r s^2 t^2 - 106 r s^2 t - 24 r s^2 + 792 r s t^4 - 660 r s t^3 - 70 r s t^2 + 64 \\
& r s t + 7 r s - 198 r t^4 + 208 r t^3 - 21 r t^2 - 14 r t - 154 s^3 t^3 + 176 s^3 t^2 - 44 s^3 t + 198 s^2 t^4 - 88 s^2 t^3 - \\
& 116 s^2 t^2 + 48 s^2 t - 198 s t^4 + 208 s t^3 - 21 s t^2 - 14 s t + 54 t^4 - 70 t^3 + 21 t^2), \\
B_{93}^{[1]} &= \frac{h^2 r^6}{27720 t^3 (r-t)^3 (s-t)^3 (t-1)^3} (-84 r^6 s t + 42 r^6 s + 126 r^6 t^2 - 84 r^6 t + 264 r^5 s^2 t - 132 r^5 s^2 - \\
& 105 r^5 s t^2 + 345 r^5 s t - 132 r^5 s - 399 r^5 t^3 - 105 r^5 t^2 + 264 r^5 t - 220 r^4 s^3 t + 110 r^4 s^3 - 616 r^4 s^2 t^2 \\
& - 506 r^4 s^2 t + 440 r^4 s^2 + 1067 r^4 s t^3 - 407 r^4 s t^2 - 506 r^4 s t + 110 r^4 s + 297 r^4 t^4 + 1067 r^4 t^3 - 616
\end{aligned}$$

$$\begin{aligned}
& r^4 t^2 - 220 r^4 t + 825 r^3 s^3 t^2 + 275 r^3 s^3 t - 396 r^3 s^3 - 363 r^3 s^2 t^3 + 2387 r^3 s^2 t^2 - 484 r^3 s^2 t - 396 r^3 s^2 - 990 r^3 s t^4 - 2992 r^3 s t^3 + 2387 r^3 s t^2 + 275 r^3 s t - 990 r^3 t^4 - 363 r^3 t^3 + 825 r^3 t^2 - 693 r^2 s^3 t^3 \\
& - 2673 r^2 s^3 t^2 + 1188 r^2 s^3 t + 396 r^2 s^3 + 891 r^2 s^2 t^4 + 891 r^2 s^2 t^3 - 3168 r^2 s^2 t^2 + 1188 r^2 s^2 t + 3564 r^2 s t^4 + 891 r^2 s t^3 - 2673 r^2 s t^2 + 891 r^2 t^4 - 693 r^2 t^3 + 2772 r s^3 t^3 + 1518 r s^3 t^2 - 2178 r s^3 t - 3564 r s^2 t^4 + 726 r s^2 t^3 + 1518 r s^2 t^2 - 3564 r s t^4 + 2772 r s t^3 - 3234 s^3 t^3 + 2310 s^3 t^2 + 4158 s^2 t^4 - 3234 s^2 t^3), \\
B_{103}^{[1]} &= \frac{-h^2 s^6}{27720 t^3 (r-t)^3 (s-t)^3 (t-1)^3} (220 r^3 s^4 t - 110 r^3 s^4 - 825 r^3 s^3 t^2 - 275 r^3 s^3 t + 396 r^3 s^3 + 693 r^3 s^2 t^3 + 2673 r^3 s^2 t^2 - 1188 r^3 s^2 t - 396 r^3 s^2 - 2772 r^3 s t^3 - 1518 r^3 s t^2 + 2178 r^3 s t + 3234 r^3 t^3 - 2310 r^3 t^2 - 264 r^2 s^5 t + 132 r^2 s^5 + 616 r^2 s^4 t^2 + 506 r^2 s^4 t - 440 r^2 s^4 + 363 r^2 s^3 t^3 - 2387 r^2 s^3 t^2 + 484 r^2 s^3 t + 396 r^2 s^3 - 891 r^2 s^2 t^4 - 891 r^2 s^2 t^3 + 3168 r^2 s^2 t^2 - 1188 r^2 s^2 t + 3564 r^2 s t^4 - 726 r^2 s t^3 - 1518 r^2 s t^2 - 4158 r^2 t^4 + 3234 r^2 t^3 + 84 r s^6 t - 42 r s^6 + 105 r s^5 t^2 - 345 r s^5 t + 132 r s^5 - 1067 r s^4 t^3 + 407 r s^4 t^2 + 506 r s^4 t - 110 r s^4 + 990 r s^3 t^4 + 2992 r s^3 t^3 - 2387 r s^3 t^2 - 275 r s^3 t - 3564 r s^2 t^4 - 891 r s^2 t^3 + 2673 r s^2 t^2 + 3564 r s t^4 - 2772 r s t^3 - 126 s^6 t^2 + 84 s^6 t + 399 s^5 t^3 + 105 s^5 t^2 - 264 s^5 t - 297 s^4 t^4 - 1067 s^4 t^3 + 616 s^4 t^2 + 220 s^4 t + 990 s^3 t^4 + 363 s^3 t^3 - 825 s^3 t^2 - 891 s^2 t^4 + 693 s^2 t^3), \\
B_{113}^{[1]} &= \frac{-h^2 t^2}{27720 (r-t)^3 (s-t)^3 (t-1)^3} (-1980 r^3 s^3 t^3 + 7920 r^3 s^3 t^2 - 10626 r^3 s^3 t + 4158 r^3 s^3 + 5148 r^3 s^2 t^4 - 20196 r^3 s^2 t^3 + 26598 r^3 s^2 t^2 - 10626 r^3 s^2 t - 4235 r^3 s t^5 + 16027 r^3 s t^4 - 20196 r^3 s t^3 + 7920 r^3 s t^2 + 1155 r^3 t^6 - 4235 r^3 t^5 + 5148 r^3 t^4 - 1980 r^3 t^3 + 5148 r^2 s^3 t^4 - 20196 r^2 s^3 t^3 + 26598 r^2 s^3 t^2 - 10626 r^2 s^3 t - 13376 r^2 s^2 t^5 + 51436 r^2 s^2 t^4 - 66330 r^2 s^2 t^3 + 26598 r^2 s^2 t^2 + 11121 r^2 s t^6 - 41437 r^2 s t^5 + 51436 r^2 s t^4 - 20196 r^2 s t^3 - 3069 r^2 t^7 + 11121 r^2 t^6 - 13376 r^2 t^5 + 5148 r^2 t^4 - 4235 r s^3 t^5 + 16027 r s^3 t^4 - 20196 r s^3 t^3 + 7920 r s^3 t^2 + 11121 r s^2 t^6 - 41437 r s^2 t^5 + 51436 r s^2 t^4 - 20196 r s^2 t^3 - 9420 r s t^7 + 34278 r s t^6 - 41437 r s t^5 + 16027 r s t^4 + 2646 r t^8 - 9420 r t^7 + 11121 r t^6 - 4235 r t^5 + 1155 s^3 t^6 - 4235 s^3 t^5 + 5148 s^3 t^4 - 1980 s^3 t^3 - 3069 s^2 t^7 + 11121 s^2 t^6 - 13376 s^2 t^5 + 5148 s^2 t^4 + 2646 s t^8 - 9420 s t^7 + 11121 s t^6 - 4235 s t^5 - 756 t^9 + 2646 t^8 - 3069 t^7 + 1155 t^6), \\
B_{123}^{[1]} &= \frac{h^2}{27720 t^3 (r-t)^3 (s-t)^3 (t-1)^3} (2310 r^3 s^3 t^2 - 2178 r^3 s^3 t + 396 r^3 s^3 - 3234 r^3 s^2 t^3 + 1518 r^3 s^2 t^2 + 1188 r^3 s^2 t - 396 r^3 s^2 + 2772 r^3 s t^3 - 2673 r^3 s t^2 + 275 r^3 s t + 110 r^3 s - 693 r^3 t^3 + 825 r^3 t^2 - 220 r^3 t - 3234 r^2 s^3 t^3 + 1518 r^2 s^3 t^2 + 1188 r^2 s^3 t - 396 r^2 s^3 + 4158 r^2 s^2 t^4 + 726 r^2 s^2 t^3 - 3168 r^2 s^2 t^2 - 484 r^2 s^2 t + 440 r^2 s^2 - 3564 r^2 s t^4 + 891 r^2 s t^3 + 2387 r^2 s t^2 - 506 r^2 s t - 132 r^2 s + 891 r^2 t^4 - 363 r^2 t^3 - 616 r^2 t^2 + 264 r^2 t + 2772 r s^3 t^3 - 2673 r s^3 t^2 + 275 r s^3 t + 110 r s^3 - 3564 r s^2 t^4 + 891 r s^2 t^3 + 2387 r s^2 t^2 - 506 r s^2 t - 132 r s^2 + 3564 r s t^4 - 2992 r s t^3 - 407 r s t^2 + 345 r s t + 42 r s - 990 r t^4 + 1067 r t^3 - 105 r t^2 - 84 r t - 693 s^3 t^3 + 825 s^3 t^2 - 220 s^3 t + 891 s^2 t^4 - 363 s^2 t^3 - 616 s^2 t^2 + 264 s^2 t - 990 s t^4 + 1067 s t^3 - 105 s t^2 - 84 s t + 297 t^4 - 399 t^3 + 126 t^2), \\
B_{133}^{[1]} &= \frac{h r^5}{1260 t^3 (r-t)^3 (s-t)^3 (t-1)^3} (-14 r^6 s t + 7 r^6 s + 21 r^6 t^2 - 14 r^6 t + 40 r^5 s^2 t - 20 r^5 s^2 - 14 r^5 s t^2 + 51 r^5 s t - 20 r^5 s - 63 r^5 t^3 - 14 r^5 t^2 + 40 r^5 t - 30 r^4 s^3 t + 15 r^4 s^3 - 90 r^4 s^2 t^2 - 65 r^4 s^2 t + 60 r^4 s^2 + 150 r^4 s t^3 - 65 r^4 s t^2 - 65 r^4 s t + 15 r^4 s + 45 r^4 t^4 + 150 r^4 t^3 - 90 r^4 t^2 - 30 r^4 t + 105 r^3 s^3 t^2 + 30 r^3 s^3 t - 48 r^3 s^3 - 39 r^3 s^2 t^3 + 306 r^3 s^2 t^2 - 72 r^3 s^2 t - 48 r^3 s^2 - 135 r^3 s t^4 - 366 r^3 s t^3 + 306 r^3 s t^2 + 30 r^3 s t - 135 r^3 t^4 - 39 r^3 t^3 + 105 r^3 t^2 - 84 r^2 s^3 t^3 - 294 r^2 s^3 t^2 + 138 r^2 s^3 t + 42 r^2 s^3 + 108 r^2 s^2 t^4 + 66 r^2 s^2 t^3 - 342 r^2 s^2 t^2 + 138 r^2 s^2 t + 432 r^2 s t^4 + 66 r^2 s t^3 - 294 r^2 s t^2 + 108 r^2 t^4 - 84 r^2 t^3 + 294 r s^3 t^3 + 126 r s^3 t^2 - 210 r s^3 t - 378 r s^2 t^4 + 126 r s^2 t^3 + 126 r s^2 t^2 - 378 r s t^4 + 294 r s t^3 - 294 s^3 t^3 + 210 s^3 t^2 + 378 s^2 t^4 - 294 s^2 t^3),
\end{aligned}$$

$$\begin{aligned}
B_{143}^{[1]} &= \frac{-hs^5}{1260t^3(r-t)^3(s-t)^3(t-1)^3} (30r^3s^4t - 15r^3s^4 - 105r^3s^3t^2 - 30r^3s^3t + 48r^3s^3 + 84r^3s^2t^3 + \\
&\quad 294r^3s^2t^2 - 138r^3s^2t - 42r^3s^2 - 294r^3st^3 - 126r^3st^2 + 210r^3st + 294r^3t^3 - 210r^3t^2 - 40r^2s^5 \\
&\quad t + 20r^2s^5 + 90r^2s^4t^2 + 65r^2s^4t - 60r^2s^4 + 39r^2s^3t^3 - 306r^2s^3t^2 + 72r^2s^3t + 48r^2s^3 - 108r^2 \\
&\quad s^2t^4 - 66r^2s^2t^3 + 342r^2s^2t^2 - 138r^2s^2t + 378r^2st^4 - 126r^2st^3 - 126r^2st^2 - 378r^2t^4 + 294r^2 \\
&\quad t^3 + 14rs^6t - 7rs^6 + 14rs^5t^2 - 51rs^5t + 20rs^5 - 150rs^4t^3 + 65rs^4t^2 + 65rs^4t - 15rs^4 + 135 \\
&\quad rs^3t^4 + 366rs^3t^3 - 306rs^3t^2 - 30rs^3t - 432rs^2t^4 - 66rs^2t^3 + 294rs^2t^2 + 378rst^4 - 294rst^3 - \\
&\quad 21s^6t^2 + 14s^6t + 63s^5t^3 + 14s^5t^2 - 40s^5t - 45s^4t^4 - 150s^4t^3 + 90s^4t^2 + 30s^4t + 135s^3t^4 + 39 \\
&\quad s^3t^3 - 105s^3t^2 - 108s^2t^4 + 84s^2t^3), \\
B_{153}^{[1]} &= \frac{-ht}{1260(r-t)^3(s-t)^3(t-1)^3} (-420r^3s^3t^3 + 1470r^3s^3t^2 - 1722r^3s^3t + 630r^3s^3 + 1164r^3s^2t^4 - \\
&\quad 4026r^3s^2t^3 + 4662r^3s^2t^2 - 1722r^3s^2t - 1050r^3st^5 + 3561r^3st^4 - 4026r^3st^3 + 1470r^3st^2 + 315 \\
&\quad r^3t^6 - 1050r^3t^5 + 1164r^3t^4 - 420r^3t^3 + 1164r^2s^3t^4 - 4026r^2s^3t^3 + 4662r^2s^3t^2 - 1722r^2s^3t - \\
&\quad 3228r^2s^2t^5 + 11034r^2s^2t^4 - 12618r^2s^2t^3 + 4662r^2s^2t^2 + 2930r^2st^6 - 9847r^2st^5 + 11034r^2st^4 - \\
&\quad 4026r^2st^3 - 885r^2t^7 + 2930r^2t^6 - 3228r^2t^5 + 1164r^2t^4 - 1050rs^3t^5 + 3561rs^3t^4 - 4026rs^3t^3 + \\
&\quad 1470rs^3t^2 + 2930rs^2t^6 - 9847rs^2t^5 + 11034rs^2t^4 - 4026rs^2t^3 - 2686rst^7 + 8913rst^6 - 9847r \\
&\quad st^5 + 3561rst^4 + 819rt^8 - 2686rt^7 + 2930rt^6 - 1050rt^5 + 315s^3t^6 - 1050s^3t^5 + 1164s^3t^4 - 420 \\
&\quad s^3t^3 - 885s^2t^7 + 2930s^2t^6 - 3228s^2t^5 + 1164s^2t^4 + 819st^8 - 2686st^7 + 2930st^6 - 1050st^5 - \\
&\quad 252t^9 + 819t^8 - 885t^7 + 315t^6), \\
B_{163}^{[1]} &= \frac{h}{1260t^3(r-t)^3(s-t)^3(t-1)^3} (210r^3s^3t^2 - 210r^3s^3t + 42r^3s^3 - 294r^3s^2t^3 + 126r^3s^2t^2 + 138 \\
&\quad r^3s^2t - 48r^3s^2 + 294r^3st^3 - 294r^3st^2 + 30r^3st + 15r^3s - 84r^3t^3 + 105r^3t^2 - 30r^3t - 294r^2s^3 \\
&\quad t^3 + 126r^2s^3t^2 + 138r^2s^3t - 48r^2s^3 + 378r^2s^2t^4 + 126r^2s^2t^3 - 342r^2s^2t^2 - 72r^2s^2t + 60r^2s^2 \\
&\quad - 378r^2st^4 + 66r^2st^3 + 306r^2st^2 - 65r^2st - 20r^2s + 108r^2t^4 - 39r^2t^3 - 90r^2t^2 + 40r^2t + 294 \\
&\quad rs^3t^3 - 294rs^3t^2 + 30rs^3t + 15rs^3 - 378rs^2t^4 + 66rs^2t^3 + 306rs^2t^2 - 65rs^2t - 20rs^2 + 432r \\
&\quad st^4 - 366rst^3 - 65rst^2 + 51rst + 7rs - 135rt^4 + 150rt^3 - 14rt^2 - 14rt - 84s^3t^3 + 105s^3t^2 - \\
&\quad 30s^3t + 108s^2t^4 - 39s^2t^3 - 90s^2t^2 + 40s^2t - 135st^4 + 150st^3 - 14st^2 - 14st + 45t^4 - 63t^3 + \\
&\quad 21t^2), \\
B_{14}^{[1]} &= \frac{h^4r^8}{2162160(r-1)^3(s-1)^3(t-1)^3} (-70r^6st + 140r^6s + 140r^6t - 210r^6 + 260r^5s^2t - 520r^5s^2 \\
&\quad + 260r^5st^2 - 705r^5st + 245r^5s - 520r^5t^2 + 245r^5t + 735r^5 - 260r^4s^3t + 520r^4s^3 - 1040r^4s^2 \\
&\quad t^2 + 1300r^4s^2t + 1300r^4s^2 - 260r^4st^3 + 1300r^4st^2 + 715r^4st - 2405r^4s + 520r^4t^3 + 1300r^4 \\
&\quad t^2 - 2405r^4t - 585r^4 + 1144r^3s^3t^2 - 910r^3s^3t - 2210r^3s^3 + 1144r^3s^2t^3 + 936r^3s^2t^2 - 6318 \\
&\quad r^3s^2t + 1222r^3s^2 - 910r^3st^3 - 6318r^3st^2 + 8528r^3st + 2340r^3s - 2210r^3t^3 + 1222r^3t^2 + 2340 \\
&\quad r^3t - 1430r^2s^3t^3 - 3718r^2s^3t^2 + 9152r^2s^3t + 2002r^2s^3 - 3718r^2s^2t^3 + 11154r^2s^2t^2 - 4576r^2 \\
&\quad s^2t - 2574r^2s^2 + 9152r^2st^3 - 4576r^2st^2 - 10296r^2st + 2002r^2t^3 - 2574r^2t^2 + 9295rs^3t^3 - \\
&\quad 7865rs^3t^2 - 10010rs^3t - 7865rs^2t^3 + 715rs^2t^2 + 12870rs^2t - 10010rst^3 + 12870rst^2 - 10725 \\
&\quad s^3t^3 + 15015s^3t^2 + 15015s^2t^3 - 19305s^2t^2), \\
B_{24}^{[1]} &= \frac{h^4s^8}{2162160(r-1)^3(s-1)^3(t-1)^3} (-260r^3s^4t + 520r^3s^4 + 1144r^3s^3t^2 - 910r^3s^3t - 2210r^3s^3 - \\
&\quad 1430r^3s^2t^3 - 3718r^3s^2t^2 + 9152r^3s^2t + 2002r^3s^2 + 9295r^3st^3 - 7865r^3st^2 - 10010r^3st - \\
&\quad 10725r^3t^3 + 15015r^3t^2 + 260r^2s^5t - 520r^2s^5 - 1040r^2s^4t^2 + 1300r^2s^4t + 1300r^2s^4 + 1144r^2 \\
&\quad s^3t^3 + 936r^2s^3t^2 - 6318r^2s^3t + 1222r^2s^3 - 3718r^2s^2t^3 + 11154r^2s^2t^2 - 4576r^2s^2t - 2574r^2 \\
&\quad s^2 - 7865r^2st^3 + 715r^2st^2 + 12870r^2st + 15015r^2t^3 - 19305r^2t^2 - 70rs^6t + 140rs^6 + 260rs^5 \\
&\quad t^2 - 705rs^5t + 245rs^5 - 260rs^4t^3 + 1300rs^4t^2 + 715rs^4t - 2405rs^4 - 910rs^3t^3 - 6318rs^3t^2 + \\
&\quad 8528rs^3t + 2340rs^3 + 9152rs^2t^3 - 4576rs^2t^2 - 10296rs^2t - 10010rst^3 + 12870rst^2 + 140s^6t
\end{aligned}$$



$$\begin{aligned}
& -210s^6 - 520s^5t^2 + 245s^5t + 735s^5 + 520s^4t^3 + 1300s^4t^2 - 2405s^4t - 585s^4 - 2210s^3t^3 + \\
& 1222s^3t^2 + 2340s^3t + 2002s^2t^3 - 2574s^2t^2), \\
B_{34}^{[1]} &= \frac{h^4t^8}{2162160(r-1)^3(s-1)^3(t-1)^3} (-1430r^3s^3t^2 + 9295r^3s^3t - 10725r^3s^3 + 1144r^3s^2t^3 - 3718 \\
& r^3s^2t^2 - 7865r^3s^2t + 15015r^3s^2 - 260r^3st^4 - 910r^3st^3 + 9152r^3st^2 - 10010r^3st + 520r^3t^4 - \\
& 2210r^3t^3 + 2002r^3t^2 + 1144r^2s^3t^3 - 3718r^2s^3t^2 - 7865r^2s^3t + 15015r^2s^3 - 1040r^2s^2t^4 + 936 \\
& r^2s^2t^3 + 11154r^2s^2t^2 + 715r^2s^2t - 19305r^2s^2 + 260r^2st^5 + 1300r^2st^4 - 6318r^2st^3 - 4576r^2s \\
& t^2 + 12870r^2st - 520r^2t^5 + 1300r^2t^4 + 1222r^2t^3 - 2574r^2t^2 - 260rs^3t^4 - 910rs^3t^3 + 9152rs^3 \\
& t^2 - 10010rs^3t + 260rs^2t^5 + 1300rs^2t^4 - 6318rs^2t^3 - 4576rs^2t^2 + 12870rs^2t - 70rst^6 - 705 \\
& rst^5 + 715rst^4 + 8528rst^3 - 10296rst^2 + 140rt^6 + 245rt^5 - 2405rt^4 + 2340rt^3 + 520s^3t^4 - \\
& 2210s^3t^3 + 2002s^3t^2 - 520s^2t^5 + 1300s^2t^4 + 1222s^2t^3 - 2574s^2t^2 + 140st^6 + 245st^5 - 2405s \\
& t^4 + 2340st^3 - 210t^6 + 735t^5 - 585t^4), \\
B_{44}^{[1]} &= \frac{h^4}{2162160(r-1)^3(s-1)^3(t-1)^3} (12870r^3s^3t^3 - 30030r^3s^3t^2 + 17875r^3s^3t - 3575r^3s^3 - \\
& 30030r^3s^2t^3 + 67210r^3s^2t^2 - 41041r^3s^2t + 8437r^3s^2 + 17875r^3st^3 - 41041r^3st^2 + 27053r^3 \\
& st - 5915r^3s - 3575r^3t^3 + 8437r^3t^2 - 5915r^3t + 1365r^3 - 30030r^2s^3t^3 + 67210r^2s^3t^2 - \\
& 41041r^2s^3t + 8437r^2s^3 + 67210r^2s^2t^3 - 148434r^2s^2t^2 + 93483r^2s^2t - 19799r^2s^2 - 41041r^2 \\
& st^3 + 93483r^2st^2 - 63011r^2st + 14105r^2s + 8437r^2t^3 - 19799r^2t^2 + 14105r^2t - 3315r^2 + \\
& 17875rs^3t^3 - 41041rs^3t^2 + 27053rs^3t - 5915rs^3 - 41041rs^2t^3 + 93483rs^2t^2 - 63011rs^2t + \\
& 14105rs^2 + 27053rst^3 - 63011rst^2 + 44520rst - 10390rs - 5915rt^3 + 14105rt^2 - 10390rt \\
& + 2520r - 3575s^3t^3 + 8437s^3t^2 - 5915s^3t + 1365s^3 + 8437s^2t^3 - 19799s^2t^2 + 14105s^2t - \\
& 3315s^2 - 5915st^3 + 14105st^2 - 10390st + 2520s + 1365t^3 - 3315t^2 + 2520t - 630), \\
B_{54}^{[1]} &= \frac{-h^3r^7}{27720(r-1)^3(s-1)^3(t-1)^3} (7r^6st - 14r^6s - 14r^6t + 21r^6 - 24r^5s^2t + 48r^5s^2 - 24r^5st^2 \\
& + 64r^5st - 21r^5s + 48r^5t^2 - 21r^5t - 70r^5 + 22r^4s^3t - 44r^4s^3 + 88r^4s^2t^2 - 106r^4s^2t - 116 \\
& r^4s^2 + 22r^4st^3 - 106r^4st^2 - 70r^4st + 208r^4s - 44r^4t^3 - 116r^4t^2 + 208r^4t + 54r^4 - 88r^3s^3 \\
& t^2 + 66r^3s^3t + 176r^3s^3 - 88r^3s^2t^3 - 88r^3s^2t^2 + 506r^3s^2t - 88r^3s^2 + 66r^3st^3 + 506r^3st^2 - \\
& 660r^3st - 198r^3s + 176r^3t^3 - 88r^3t^2 - 198r^3t + 99r^2s^3t^3 + 275r^2s^3t^2 - 649r^2s^3t - 154r^2 \\
& s^3 + 275r^2s^2t^3 - 781r^2s^2t^2 + 275r^2s^2t + 198r^2s^2 - 649r^2st^3 + 275r^2st^2 + 792r^2st - 154r^2 \\
& t^3 + 198r^2t^2 - 594rs^3t^3 + 462rs^3t^2 + 693rs^3t + 462rs^2t^3 + 66rs^2t^2 - 891rs^2t + 693rst^3 - \\
& 891rst^2 + 660s^3t^3 - 924s^3t^2 - 924s^2t^3 + 1188s^2t^2), \\
B_{64}^{[1]} &= \frac{-h^3s^7}{27720(r-1)^3(s-1)^3(t-1)^3} (22r^3s^4t - 44r^3s^4 - 88r^3s^3t^2 + 66r^3s^3t + 176r^3s^3 + 99r^3s^2t^3 \\
& + 275r^3s^2t^2 - 649r^3s^2t - 154r^3s^2 - 594r^3st^3 + 462r^3st^2 + 693r^3st + 660r^3t^3 - 924r^3t^2 - 24 \\
& r^2s^5t + 48r^2s^5 + 88r^2s^4t^2 - 106r^2s^4t - 116r^2s^4 - 88r^2s^3t^3 - 88r^2s^3t^2 + 506r^2s^3t - 88r^2s^3 + \\
& 275r^2s^2t^3 - 781r^2s^2t^2 + 275r^2s^2t + 198r^2s^2 + 462r^2st^3 + 66r^2st^2 - 891r^2st - 924r^2t^3 + 1188 \\
& r^2t^2 + 7rs^6t - 14rs^6 - 24rs^5t^2 + 64rs^5t - 21rs^5 + 22rs^4t^3 - 106rs^4t^2 - 70rs^4t + 208rs^4 + 66 \\
& rs^3t^3 + 506rs^3t^2 - 660rs^3t - 198rs^3 - 649rs^2t^3 + 275rs^2t^2 + 792rs^2t + 693rst^3 - 891rst^2 - \\
& 14s^6t + 21s^6 + 48s^5t^2 - 21s^5t - 70s^5 - 44s^4t^3 - 116s^4t^2 + 208s^4t + 54s^4 + 176s^3t^3 - 88s^3t^2 - \\
& 198s^3t - 154s^2t^3 + 198s^2t^2), \\
B_{74}^{[1]} &= \frac{-h^3t^7}{27720(r-1)^3(s-1)^3(t-1)^3} (99r^3s^3t^2 - 594r^3s^3t + 660r^3s^3 - 88r^3s^2t^3 + 275r^3s^2t^2 + 462r^3 \\
& s^2t - 924r^3s^2 + 22r^3st^4 + 66r^3st^3 - 649r^3st^2 + 693r^3st - 44r^3t^4 + 176r^3t^3 - 154r^3t^2 - 88r^2 \\
& s^3t^3 + 275r^2s^3t^2 + 462r^2s^3t - 924r^2s^3 + 88r^2s^2t^4 - 88r^2s^2t^3 - 781r^2s^2t^2 + 66r^2s^2t + 1188r^2 \\
& s^2 - 24r^2st^5 - 106r^2st^4 + 506r^2st^3 + 275r^2st^2 - 891r^2st + 48r^2t^5 - 116r^2t^4 - 88r^2t^3 + 198r^2 \\
& t^2 + 22rs^3t^4 + 66rs^3t^3 - 649rs^3t^2 + 693rs^3t - 24rs^2t^5 - 106rs^2t^4 + 506rs^2t^3 + 275rs^2t^2 - 891
\end{aligned}$$

$$rs^2t + 7rst^6 + 64rst^5 - 70rst^4 - 660rst^3 + 792rst^2 - 14rt^6 - 21rt^5 + 208rt^4 - 198rt^3 - 44s^3t^4 + 176s^3t^3 - 154s^3t^2 + 48s^2t^5 - 116s^2t^4 - 88s^2t^3 + 198s^2t^2 - 14st^6 - 21st^5 + 208st^4 - 198st^3 + 21t^6 - 70t^5 + 54t^4),$$

$$B_{84}^{[1]} = \frac{h^3}{27720(r-1)^3(s-1)^3(t-1)^3} (924r^3s^3t^3 - 2244r^3s^3t^2 + 1485r^3s^3t - 330r^3s^3 - 2244r^3s^2t^3 + 5280r^3s^2t^2 - 3575r^3s^2t + 814r^3s^2 + 1485r^3st^3 - 3575r^3st^2 + 2574r^3st - 616r^3s - 330r^3t^3 + 814r^3t^2 - 616r^3t + 154r^3 - 2244r^2s^3t^3 + 5280r^2s^3t^2 - 3575r^2s^3t + 814r^2s^3 + 5280r^2s^2t^3 - 12320r^2s^2t^2 + 8569r^2s^2t - 2002r^2s^2 - 3575r^2st^3 + 8569r^2st^2 - 6290r^2st + 1536r^2s + 814r^2t^3 - 2002r^2t^2 + 1536r^2t - 390r^2 + 1485rs^3t^3 - 3575rs^3t^2 + 2574rs^3t - 616rs^3 - 3575rs^2t^3 + 8569rs^2t^2 - 6290rs^2t + 1536rs^2 + 2574rst^3 - 6290rst^2 + 4793rst - 1210rs - 616rt^3 + 1536rt^2 - 1210rt + 315r - 330s^3t^3 + 814s^3t^2 - 616s^3t + 154s^3 + 814s^2t^3 - 2002s^2t^2 + 1536s^2t - 390s^2 - 616st^3 + 1536st^2 - 1210st + 315s + 154t^3 - 390t^2 + 315t - 84),$$

$$B_{94}^{[1]} = \frac{-h^2r^6}{27720(r-1)^3(s-1)^3(t-1)^3} (42r^6st - 84r^6s - 84r^6t + 126r^6 - 132r^5s^2t + 264r^5s^2 - 132r^5st^2 + 345r^5st - 105r^5s + 264r^5t^2 - 105r^5t - 399r^5 + 110r^4s^3t - 220r^4s^3 + 440r^4s^2t^2 - 506r^4s^2t - 616r^4s^2 + 110r^4st^3 - 506r^4st^2 - 407r^4st + 1067r^4s - 220r^4t^3 - 616r^4t^2 + 1067r^4t + 297r^4 - 396r^3s^3t^2 + 275r^3s^3t + 825r^3s^3 - 396r^3s^2t^3 - 484r^3s^2t^2 + 2387r^3s^2t - 363r^3s^2 + 275r^3st^3 + 2387r^3st^2 - 2992r^3st - 990r^3s + 825r^3t^3 - 363r^3t^2 - 990r^3t + 396r^2s^3t^3 + 1188r^2s^3t^2 - 2673r^2s^3t - 693r^2s^3 + 1188r^2s^2t^3 - 3168r^2s^2t^2 + 891r^2s^2t + 891r^2s^2 - 2673r^2st^3 + 891r^2st^2 + 3564r^2st - 693r^2t^3 + 891r^2t^2 - 2178rs^3t^3 + 1518rs^3t^2 + 2772rs^3t + 1518rs^2t^3 + 726rs^2t^2 - 3564rs^2t + 2772rst^3 - 3564rst^2 + 2310s^3t^3 - 3234s^3t^2 - 3234s^2t^3 + 4158s^2t^2),$$

$$B_{104}^{[1]} = \frac{-h^2s^6}{27720(r-1)^3(s-1)^3(t-1)^3} (110r^3s^4t - 220r^3s^4 - 396r^3s^3t^2 + 275r^3s^3t + 825r^3s^3 + 396r^3s^2t^3 + 1188r^3s^2t^2 - 2673r^3s^2t - 693r^3s^2 - 2178r^3st^3 + 1518r^3st^2 + 2772r^3st + 2310r^3t^3 - 3234r^3t^2 - 132r^2s^5t + 264r^2s^5 + 440r^2s^4t^2 - 506r^2s^4t - 616r^2s^4 - 396r^2s^3t^3 - 484r^2s^3t^2 + 2387r^2s^3t - 363r^2s^3 + 1188r^2s^2t^3 - 3168r^2s^2t^2 + 891r^2s^2t + 891r^2s^2 + 1518r^2st^3 + 726r^2st^2 - 3564r^2st - 3234r^2t^3 + 4158r^2t^2 + 42rs^6t - 84rs^6 - 132rs^5t^2 + 345rs^5t - 105rs^5 + 110rs^4t^3 - 506rs^4t^2 - 407rs^4t + 1067rs^4 + 275rs^3t^3 + 2387rs^3t^2 - 2992rs^3t - 990rs^3 - 2673rs^2t^3 + 891rs^2t^2 + 3564rs^2t + 2772rst^3 - 3564rst^2 - 84s^6t + 126s^6 + 264s^5t^2 - 105s^5t - 399s^5 - 220s^4t^3 - 616s^4t^2 + 1067s^4t + 297s^4 + 825s^3t^3 - 363s^3t^2 - 990s^3t - 693s^2t^3 + 891s^2t^2),$$

$$B_{114}^{[1]} = \frac{-h^2t^6}{27720(r-1)^3(s-1)^3(t-1)^3} (396r^3s^3t^2 - 2178r^3s^3t + 2310r^3s^3 - 396r^3s^2t^3 + 1188r^3s^2t^2 + 1518r^3s^2t - 3234r^3s^2 + 110r^3st^4 + 275r^3st^3 - 2673r^3st^2 + 2772r^3st - 220r^3t^4 + 825r^3t^3 - 693r^3t^2 - 396r^2s^3t^3 + 1188r^2s^3t^2 + 1518r^2s^3t - 3234r^2s^3 + 440r^2s^2t^4 - 484r^2s^2t^3 - 3168r^2s^2t^2 + 726r^2s^2t + 4158r^2s^2 - 132r^2st^5 - 506r^2st^4 + 2387r^2st^3 + 891r^2st^2 - 3564r^2st + 264r^2t^5 - 616r^2t^4 - 363r^2t^3 + 891r^2t^2 + 110rs^3t^4 + 275rs^3t^3 - 2673rs^3t^2 + 2772rs^3t - 132rs^2t^5 - 506rs^2t^4 + 2387rs^2t^3 + 891rs^2t^2 - 3564rs^2t + 42rst^6 + 345rst^5 - 407rst^4 - 2992rst^3 + 3564rst^2 - 84rt^6 - 105rt^5 + 1067rt^4 - 990rt^3 - 220s^3t^4 + 825s^3t^3 - 693s^3t^2 + 264s^2t^5 - 616s^2t^4 - 363s^2t^3 + 891s^2t^2 - 84st^6 - 105st^5 + 1067st^4 - 990st^3 + 126t^6 - 399t^5 + 297t^4),$$

$$B_{124}^{[1]} = \frac{h^2}{27720(r-1)^3(s-1)^3(t-1)^3} (4158r^3s^3t^3 - 10626r^3s^3t^2 + 7920r^3s^3t - 1980r^3s^3 - 10626r^3s^2t^3 + 26598r^3s^2t^2 - 20196r^3s^2t + 5148r^3s^2 + 7920r^3st^3 - 20196r^3st^2 + 16027r^3st - 4235r^3s - 1980r^3t^3 + 5148r^3t^2 - 4235r^3t + 1155r^3 - 10626r^2s^3t^3 + 26598r^2s^3t^2 - 20196r^2s^3t + 5148r^2s^3 + 26598r^2s^2t^3 - 66330r^2s^2t^2 + 51436r^2s^2t - 13376r^2s^2 - 20196r^2st^3 + 51436r^2st^2 - 41437r^2st + 11121r^2s + 5148r^2t^3 - 13376r^2t^2 + 11121r^2t - 3069r^2 + 7920rs^3t^3 - 20196rs^3t^2 + 16027rs^3t - 4235rs^3 - 20196rs^2t^3 + 51436rs^2t^2 - 41437rs^2t + 11121rs^2 + 16027rst^3$$

$$\begin{aligned}
& -41437rst^2 + 34278rst - 9420rs - 4235rt^3 + 11121rt^2 - 9420rt + 2646r - 1980s^3t^3 + 5148 \\
& s^3t^2 - 4235s^3t + 1155s^3 + 5148s^2t^3 - 13376s^2t^2 + 11121s^2t - 3069s^2 - 4235st^3 + 11121st^2 \\
& -9420st + 2646s + 1155t^3 - 3069t^2 + 2646t - 756) , \\
B_{134}^{[1]} &= \frac{-hr^5}{1260(r-1)^3(s-1)^3(t-1)^3} (7r^6st - 14r^6s - 14r^6t + 21r^6 - 20r^5s^2t + 40r^5s^2 - 20r^5st^2 + \\
& 51r^5st - 14r^5s + 40r^5t^2 - 14r^5t - 63r^5 + 15r^4s^3t - 30r^4s^3 + 60r^4s^2t^2 - 65r^4s^2t - 90r^4s^2 \\
& + 15r^4st^3 - 65r^4st^2 - 65r^4st + 150r^4s - 30r^4t^3 - 90r^4t^2 + 150r^4t + 45r^4 - 48r^3s^3t^2 + 30r^3 \\
& s^3t + 105r^3s^3 - 48r^3s^2t^3 - 72r^3s^2t^2 + 306r^3s^2t - 39r^3s^2 + 30r^3st^3 + 306r^3st^2 - 366r^3st - \\
& 135r^3s + 105r^3t^3 - 39r^3t^2 - 135r^3t + 42r^2s^3t^3 + 138r^2s^3t^2 - 294r^2s^3t - 84r^2s^3 + 138r^2s^2 \\
& t^3 - 342r^2s^2t^2 + 66r^2s^2t + 108r^2s^2 - 294r^2st^3 + 66r^2st^2 + 432r^2st - 84r^2t^3 + 108r^2t^2 - \\
& 210r^2t^3 + 126rs^3t^2 + 294rs^3t + 126rs^2t^3 + 126rs^2t^2 - 378rs^2t + 294rst^3 - 378rst^2 + 210 \\
& s^3t^3 - 294s^3t^2 - 294s^2t^3 + 378s^2t^2) , \\
B_{144}^{[1]} &= \frac{-hs^5}{1260(r-1)^3(s-1)^3(t-1)^3} (15r^3s^4t - 30r^3s^4 - 48r^3s^3t^2 + 30r^3s^3t + 105r^3s^3 + 42r^3s^2t^3 + \\
& 138r^3s^2t^2 - 294r^3s^2t - 84r^3s^2 - 210r^3st^3 + 126r^3st^2 + 294r^3st + 210r^3t^3 - 294r^3t^2 - 20r^2 \\
& s^5t + 40r^2s^5 + 60r^2s^4t^2 - 65r^2s^4t - 90r^2s^4 - 48r^2s^3t^3 - 72r^2s^3t^2 + 306r^2s^3t - 39r^2s^3 + 138 \\
& r^2s^2t^3 - 342r^2s^2t^2 + 66r^2s^2t + 108r^2s^2 + 126r^2st^3 + 126r^2st^2 - 378r^2st - 294r^2t^3 + 378r^2t^2 \\
& + 7rs^6t - 14rs^6 - 20rs^5t^2 + 51rs^5t - 14rs^5 + 15rs^4t^3 - 65rs^4t^2 - 65rs^4t + 150rs^4 + 30rs^3t^3 \\
& + 306rs^3t^2 - 366rs^3t - 135rs^3 - 294rs^2t^3 + 66rs^2t^2 + 432rs^2t + 294rst^3 - 378rst^2 - 14s^6t + \\
& 21s^6 + 40s^5t^2 - 14s^5t - 63s^5 - 30s^4t^3 - 90s^4t^2 + 150s^4t + 45s^4 + 105s^3t^3 - 39s^3t^2 - 135s^3t \\
& - 84s^2t^3 + 108s^2t^2) , \\
B_{154}^{[1]} &= \frac{-ht^5}{1260(r-1)^3(s-1)^3(t-1)^3} (42r^3s^3t^2 - 210r^3s^3t + 210r^3s^3 - 48r^3s^2t^3 + 138r^3s^2t^2 + 126r^3 \\
& s^2t - 294r^3s^2 + 15r^3st^4 + 30r^3st^3 - 294r^3st^2 + 294r^3st - 30r^3t^4 + 105r^3t^3 - 84r^3t^2 - 48r^2 \\
& s^3t^3 + 138r^2s^3t^2 + 126r^2s^3t - 294r^2s^3 + 60r^2s^2t^4 - 72r^2s^2t^3 - 342r^2s^2t^2 + 126r^2s^2t + 378r^2 \\
& s^2 - 20r^2st^5 - 65r^2st^4 + 306r^2st^3 + 66r^2st^2 - 378r^2st + 40r^2t^5 - 90r^2t^4 - 39r^2t^3 + 108r^2t^2 \\
& + 15rs^3t^4 + 30rs^3t^3 - 294rs^3t^2 + 294rs^3t - 20rs^2t^5 - 65rs^2t^4 + 306rs^2t^3 + 66rs^2t^2 - 378rs^2 \\
& t + 7rst^6 + 51rst^5 - 65rst^4 - 366rst^3 + 432rst^2 - 14rt^6 - 14rt^5 + 150rt^4 - 135rt^3 - 30s^3t^4 \\
& + 105s^3t^3 - 84s^3t^2 + 40s^2t^5 - 90s^2t^4 - 39s^2t^3 + 108s^2t^2 - 14st^6 - 14st^5 + 150st^4 - 135st^3 + \\
& 21t^6 - 63t^5 + 45t^4) , \\
B_{164}^{[1]} &= \frac{h}{1260(r-1)^3(s-1)^3(t-1)^3} (630r^3s^3t^3 - 1722r^3s^3t^2 + 1470r^3s^3t - 420r^3s^3 - 1722r^3s^2t^3 + \\
& 4662r^3s^2t^2 - 4026r^3s^2t + 1164r^3s^2 + 1470r^3st^3 - 4026r^3st^2 + 3561r^3st - 1050r^3s - 420r^3t^3 \\
& + 1164r^3t^2 - 1050r^3t + 315r^3 - 1722r^2s^3t^3 + 4662r^2s^3t^2 - 4026r^2s^3t + 1164r^2s^3 + 4662r^2s^2 \\
& t^3 - 12618r^2s^2t^2 + 11034r^2s^2t - 3228r^2s^2 - 4026r^2st^3 + 11034r^2st^2 - 9847r^2st + 2930r^2s + \\
& 1164r^2t^3 - 3228r^2t^2 + 2930r^2t - 885r^2 + 1470rs^3t^3 - 4026rs^3t^2 + 3561rs^3t - 1050rs^3 - 4026 \\
& rs^2t^3 + 11034rs^2t^2 - 9847rs^2t + 2930rs^2 + 3561rst^3 - 9847rst^2 + 8913rst - 2686rs - 1050r \\
& t^3 + 2930rt^2 - 2686rt + 819r - 420s^3t^3 + 1164s^3t^2 - 1050s^3t + 315s^3 + 1164s^2t^3 - 3228s^2t^2 \\
& + 2930s^2t - 885s^2 - 1050st^3 + 2930st^2 - 2686st + 819s + 315t^3 - 885t^2 + 819t - 252) . \\
D_{116}^{[0]} &= \frac{h^5r^5}{2162160s^2t^2} (35r^6 - 130r^5s - 130r^5t - 130r^5 + 130r^4s^2 + 520r^4st + 520r^4s + 130r^4t^2 + 520 \\
& r^4t + 130r^4 - 572r^3s^2t - 572r^3s^2 - 572r^3st^2 - 2288r^3st - 572r^3s - 572r^3t^2 - 572r^3t + 715 \\
& r^2s^2t^2 + 2860r^2s^2t + 715r^2s^2 + 2860r^2st^2 + 2860r^2st + 715r^2t^2 - 4290rs^2t^2 - 4290rs^2t - \\
& 4290rst^2 + 8580s^2t^2) , \\
D_{216}^{[0]} &= \frac{h^5s^5}{2162160r^2t^2} (130r^2s^4 - 572r^2s^3t - 572r^2s^3 + 715r^2s^2t^2 + 2860r^2s^2t + 715r^2s^2 - 4290r^2st^2
\end{aligned}$$

$$\begin{aligned}
& -4290r^2st + 8580r^2t^2 - 130rs^5 + 520rs^4t + 520rs^4 - 572rs^3t^2 - 2288rs^3t - 572rs^3 + 2860 \\
& rs^2t^2 + 2860rs^2t - 4290rst^2 + 35s^6 - 130s^5t - 130s^5 + 130s^4t^2 + 520s^4t + 130s^4 - 572s^3t^2 \\
& -572s^3t + 715s^2t^2) , \\
D_{316}^{[0]} &= \frac{h^5t^5}{2162160r^2s^2} (715r^2s^2t^2 - 4290r^2s^2t + 8580r^2s^2 - 572r^2st^3 + 2860r^2st^2 - 4290r^2st + 130r^2 \\
& t^4 - 572r^2t^3 + 715r^2t^2 - 572rs^2t^3 + 2860rs^2t^2 - 4290rs^2t + 520rst^4 - 2288rst^3 + 2860rst^2 \\
& -130rt^5 + 520rt^4 - 572rt^3 + 130s^2t^4 - 572s^2t^3 + 715s^2t^2 - 130st^5 + 520st^4 - 572st^3 + 35t^6 \\
& -130t^5 + 130t^4) , \\
D_{416}^{[0]} &= \frac{h^5}{2162160r^2s^2t^2} (8580r^2s^2t^2 - 4290r^2s^2t + 715r^2s^2 - 4290r^2st^2 + 2860r^2st - 572r^2s + 715r^2 \\
& t^2 - 572r^2t + 130r^2 - 4290rs^2t^2 + 2860rs^2t - 572rs^2 + 2860rst^2 - 2288rst + 520rs - 572rt^2 \\
& +520rt - 130r + 715s^2t^2 - 572s^2t + 130s^2 - 572st^2 + 520st - 130s + 130t^2 - 130t + 35) , \\
D_{516}^{[0]} &= \frac{h^4r^4}{55440s^2t^2} (7r^6 - 24r^5s - 24r^5t - 24r^5 + 22r^4s^2 + 88r^4st + 88r^4s + 22r^4t^2 + 88r^4t + 22r^4 - \\
& 88r^3s^2t - 88r^3s^2 - 88r^3st^2 - 352r^3st - 88r^3s - 88r^3t^2 - 88r^3t + 99r^2s^2t^2 + 396r^2s^2t + 99r^2 \\
& s^2 + 396r^2st^2 + 396r^2st + 99r^2t^2 - 528rs^2t^2 - 528rs^2t - 528rst^2 + 924s^2t^2) , \\
D_{616}^{[0]} &= \frac{h^4s^4}{55440r^2t^2} (22r^2s^4 - 88r^2s^3t - 88r^2s^3 + 99r^2s^2t^2 + 396r^2s^2t + 99r^2s^2 - 528r^2st^2 - 528r^2st \\
& +924r^2t^2 - 24rs^5 + 88rs^4t + 88rs^4 - 88rs^3t^2 - 352rs^3t - 88rs^3 + 396rs^2t^2 + 396rs^2t - 528 \\
& rst^2 + 7s^6 - 24s^5t - 24s^5 + 22s^4t^2 + 88s^4t + 22s^4 - 88s^3t^2 - 88s^3t + 99s^2t^2) , \\
D_{716}^{[0]} &= \frac{h^4t^4}{55440r^2s^2} (99r^2s^2t^2 - 528r^2s^2t + 924r^2s^2 - 88r^2st^3 + 396r^2st^2 - 528r^2st + 22r^2t^4 - 88r^2t^3 \\
& +99r^2t^2 - 88rs^2t^3 + 396rs^2t^2 - 528rs^2t + 88rst^4 - 352rst^3 + 396rst^2 - 24rt^5 + 88rt^4 - 88r \\
& t^3 + 22s^2t^4 - 88s^2t^3 + 99s^2t^2 - 24st^5 + 88st^4 - 88st^3 + 7t^6 - 24t^5 + 22t^4) , \\
D_{816}^{[0]} &= \frac{h^4}{55440r^2s^2t^2} (924r^2s^2t^2 - 528r^2s^2t + 99r^2s^2 - 528r^2st^2 + 396r^2st - 88r^2s + 99r^2t^2 - 88r^2t \\
& +22r^2 - 528rs^2t^2 + 396rs^2t - 88rs^2 + 396rst^2 - 352rst + 88rs - 88rt^2 + 88rt - 24r + 99s^2 \\
& t^2 - 88s^2t + 22s^2 - 88st^2 + 88st - 24s + 22t^2 - 24t + 7) , \\
D_{916}^{[0]} &= \frac{h^3r^3}{27720s^2t^2} (21r^6 - 66r^5s - 66r^5t - 66r^5 + 55r^4s^2 + 220r^4st + 220r^4s + 55r^4t^2 + 220r^4t + 55 \\
& r^4 - 198r^3s^2t - 198r^3s^2 - 198r^3st^2 - 792r^3st - 198r^3s - 198r^3t^2 - 198r^3t + 198r^2s^2t^2 + 792 \\
& r^2s^2t + 198r^2s^2 + 792r^2st^2 + 792r^2st + 198r^2t^2 - 924rs^2t^2 - 924rs^2t - 924rst^2 + 1386s^2t^2) , \\
D_{1016}^{[0]} &= \frac{h^3s^3}{27720r^2t^2} (55r^2s^4 - 198r^2s^3t - 198r^2s^3 + 198r^2s^2t^2 + 792r^2s^2t + 198r^2s^2 - 924r^2st^2 - 924r^2 \\
& st + 1386r^2t^2 - 66rs^5 + 220rs^4t + 220rs^4 - 198rs^3t^2 - 792rs^3t - 198rs^3 + 792rs^2t^2 + 792rs^2 \\
& t - 924rst^2 + 21s^6 - 66s^5t - 66s^5 + 55s^4t^2 + 220s^4t + 55s^4 - 198s^3t^2 - 198s^3t + 198s^2t^2) , \\
D_{1116}^{[0]} &= \frac{h^3t^3}{27720r^2s^2} (198r^2s^2t^2 - 924r^2s^2t + 1386r^2s^2 - 198r^2st^3 + 792r^2st^2 - 924r^2st + 55r^2t^4 - 198 \\
& r^2t^3 + 198r^2t^2 - 198rs^2t^3 + 792rs^2t^2 - 924rs^2t + 220rst^4 - 792rst^3 + 792rst^2 - 66rt^5 + 220 \\
& rt^4 - 198rt^3 + 55s^2t^4 - 198s^2t^3 + 198s^2t^2 - 66st^5 + 220st^4 - 198st^3 + 21t^6 - 66t^5 + 55t^4) , \\
D_{1216}^{[0]} &= \frac{h^3}{27720r^2s^2t^2} (1386r^2s^2t^2 - 924r^2s^2t + 198r^2s^2 - 924r^2st^2 + 792r^2st - 198r^2s + 198r^2t^2 - 198 \\
& r^2t + 55r^2 - 924rs^2t^2 + 792rs^2t - 198rs^2 + 792rst^2 - 792rst + 220rs - 198rt^2 + 220rt - 66r \\
& +198s^2t^2 - 198s^2t + 55s^2 - 198st^2 + 220st - 66s + 55t^2 - 66t + 21) , \\
D_{1316}^{[0]} &= \frac{h^2r^2}{2520s^2t^2} (7r^6 - 20r^5s - 20r^5t - 20r^5 + 15r^4s^2 + 60r^4st + 60r^4s + 15r^4t^2 + 60r^4t + 15r^4 - 48 \\
& r^3s^2t - 48r^3s^2 - 48r^3st^2 - 192r^3st - 48r^3s - 48r^3t^2 - 48r^3t + 42r^2s^2t^2 + 168r^2s^2t + 42r^2s^2 + \\
& 168r^2st^2 + 168r^2st + 42r^2t^2 - 168rs^2t^2 - 168rs^2t - 168rst^2 + 210s^2t^2) ,
\end{aligned}$$

$$\begin{aligned}
D_{1416}^{[0]} &= \frac{h^2 s^2}{2520 r^2 t^2} (15 r^2 s^4 - 48 r^2 s^3 t - 48 r^2 s^3 + 42 r^2 s^2 t^2 + 168 r^2 s^2 t + 42 r^2 s^2 - 168 r^2 s t^2 - 168 r^2 s t + \\
&\quad 210 r^2 t^2 - 20 r s^5 + 60 r s^4 t + 60 r s^4 - 48 r s^3 t^2 - 192 r s^3 t - 48 r s^3 + 168 r s^2 t^2 + 168 r s^2 t - 168 r s t^2 \\
&\quad + 7 s^6 - 20 s^5 t - 20 s^5 + 15 s^4 t^2 + 60 s^4 t + 15 s^4 - 48 s^3 t^2 - 48 s^3 t + 42 s^2 t^2) , \\
D_{1516}^{[0]} &= \frac{h^2 t^2}{2520 r^2 s^2} (42 r^2 s^2 t^2 - 168 r^2 s^2 t + 210 r^2 s^2 - 48 r^2 s t^3 + 168 r^2 s t^2 - 168 r^2 s t + 15 r^2 t^4 - 48 r^2 t^3 + \\
&\quad 42 r^2 t^2 - 48 r s^2 t^3 + 168 r s^2 t^2 - 168 r s^2 t + 60 r s t^4 - 192 r s t^3 + 168 r s t^2 - 20 r t^5 + 60 r t^4 - 48 r t^3 \\
&\quad + 15 s^2 t^4 - 48 s^2 t^3 + 42 s^2 t^2 - 20 s t^5 + 60 s t^4 - 48 s t^3 + 7 t^6 - 20 t^5 + 15 t^4) , \\
D_{1616}^{[0]} &= \frac{h^2}{2520 r^2 s^2 t^2} (210 r^2 s^2 t^2 - 168 r^2 s^2 t + 42 r^2 s^2 - 168 r^2 s t^2 + 168 r^2 s t - 48 r^2 s + 42 r^2 t^2 - 48 r^2 t + \\
&\quad 15 r^2 - 168 r s^2 t^2 + 168 r s^2 t - 48 r s^2 + 168 r s t^2 - 192 r s t + 60 r s - 48 r t^2 + 60 r t - 20 r + 42 s^2 t^2 \\
&\quad - 48 s^2 t + 15 s^2 - 48 s t^2 + 60 s t - 20 s + 15 t^2 - 20 t + 7) . \\
D_{11}^{[1]} &= \frac{-h^5 r^5}{1081080(r-s)^2(r-t)^2(r-1)^2} (28 r^6 - 91 r^5 s - 91 r^5 t - 91 r^5 + 78 r^4 s^2 + 312 r^4 s t + 312 r^4 s \\
&\quad + 78 r^4 t^2 + 312 r^4 t + 78 r^4 - 286 r^3 s^2 t - 286 r^3 s^2 - 286 r^3 s t^2 - 1144 r^3 s t - 286 r^3 s - 286 r^3 t^2 - \\
&\quad 286 r^3 t + 286 r^2 s^2 t^2 + 1144 r^2 s^2 t + 286 r^2 s^2 + 1144 r^2 s t^2 + 1144 r^2 s t + 286 r^2 t^2 - 1287 r s^2 t^2 - \\
&\quad 1287 r s^2 t - 1287 r s t^2 + 1716 s^2 t^2) , \\
D_{21}^{[1]} &= \frac{-h^5 s^8}{2162160 r^2(r-s)^2(r-t)^2(r-1)^2} (572 s^2 t^2 - 130 s^3 t^2 + 286 r s^2 - 260 r s^3 + 65 r s^4 + 2145 r t^2 \\
&\quad - 715 s t^2 + 572 s^2 t - 520 s^3 t + 130 s^4 t - 130 s^3 + 130 s^4 - 35 s^5 - 1430 r s t^2 + 1144 r s^2 t - 260 r \\
&\quad s^3 t + 286 r s^2 t^2 - 1430 r s t) , \\
D_{31}^{[1]} &= \frac{-h^5 t^8}{2162160 r^2(r-s)^2(r-t)^2(r-1)^2} (572 s^2 t^2 - 130 s^2 t^3 + 2145 r s^2 + 286 r t^2 - 260 r t^3 + 65 r t^4 + \\
&\quad 572 s t^2 - 715 s^2 t - 520 s t^3 + 130 s t^4 - 130 t^3 + 130 t^4 - 35 t^5 + 1144 r s t^2 - 1430 r s^2 t - 260 r s t^3 + \\
&\quad 286 r s^2 t^2 - 1430 r s t) , \\
D_{41}^{[1]} &= \frac{-h^5}{2162160 r^2(r-s)^2(r-t)^2(r-1)^2} (65 r + 130 s + 130 t - 715 s^2 t^2 - 260 r s - 260 r t - 520 s t + \\
&\quad 286 r s^2 + 286 r t^2 + 572 s t^2 + 572 s^2 t - 130 s^2 - 130 t^2 - 1430 r s t^2 - 1430 r s^2 t + 2145 r s^2 t^2 + \\
&\quad 1144 r s t - 35) , \\
D_{51}^{[1]} &= \frac{-h^4 r^4}{55440(r-s)^2(r-t)^2(r-1)^2} (14 r^6 - 42 r^5 s - 42 r^5 t - 42 r^5 + 33 r^4 s^2 + 132 r^4 s t + 132 r^4 s + \\
&\quad 33 r^4 t^2 + 132 r^4 t + 33 r^4 - 110 r^3 s^2 t - 110 r^3 s^2 - 110 r^3 s t^2 - 440 r^3 s t - 110 r^3 s - 110 r^3 t^2 - \\
&\quad 110 r^3 t + 99 r^2 s^2 t^2 + 396 r^2 s^2 t + 99 r^2 s^2 + 396 r^2 s t^2 + 396 r^2 s t + 99 r^2 t^2 - 396 r s^2 t^2 - 396 r s^2 \\
&\quad t - 396 r s t^2 + 462 s^2 t^2) , \\
D_{61}^{[1]} &= \frac{-h^4 s^7}{55440 r^2(r-s)^2(r-t)^2(r-1)^2} (88 s^2 t^2 - 22 s^3 t^2 + 44 r s^2 - 44 r s^3 + 12 r s^4 + 264 r t^2 - 99 s t^2 \\
&\quad + 88 s^2 t - 88 s^3 t + 24 s^4 t - 22 s^3 + 24 s^4 - 7 s^5 - 198 r s t^2 + 176 r s^2 t - 44 r s^3 t + 44 r s^2 t^2 - 198 r s t) , \\
D_{71}^{[1]} &= \frac{-h^4 t^7}{55440 r^2(r-s)^2(r-t)^2(r-1)^2} (88 s^2 t^2 - 22 s^2 t^3 + 264 r s^2 + 44 r t^2 - 44 r t^3 + 12 r t^4 + 88 s t^2 \\
&\quad - 99 s^2 t - 88 s^3 t + 24 s t^4 - 22 t^3 + 24 t^4 - 7 t^5 + 176 r s t^2 - 198 r s^2 t - 44 r s t^3 + 44 r s^2 t^2 - 198 r s t) , \\
D_{81}^{[1]} &= \frac{-h^4}{55440 r^2(r-s)^2(r-t)^2(r-1)^2} (12 r + 24 s + 24 t - 99 s^2 t^2 - 44 r s - 44 r t - 88 s t + 44 r s^2 + 44 \\
&\quad r t^2 + 88 s t^2 + 88 s^2 t - 22 s^2 - 22 t^2 - 198 r s t^2 - 198 r s^2 t + 264 r s^2 t^2 + 176 r s t - 7) , \\
D_{91}^{[1]} &= \frac{-h^3 r^3}{13860(r-s)^2(r-t)^2(r-1)^2} (28 r^6 - 77 r^5 s - 77 r^5 t - 77 r^5 + 55 r^4 s^2 + 220 r^4 s t + 220 r^4 s + 55 \\
&\quad r^4 t^2 + 220 r^4 t + 55 r^4 - 165 r^3 s^2 t - 165 r^3 s^2 - 165 r^3 s t^2 - 660 r^3 s t - 165 r^3 s - 165 r^3 t^2 - 165 r^3 \\
&\quad t + 132 r^2 s^2 t^2 + 528 r^2 s^2 t + 132 r^2 s^2 + 528 r^2 s t^2 + 528 r^2 s t + 132 r^2 t^2 - 462 r s^2 t^2 - 462 r s^2 t - \\
&\quad 462 r s t^2 + 462 s^2 t^2) ,
\end{aligned}$$

$$\begin{aligned}
D_{101}^{[1]} &= \frac{-h^3 s^6}{27720r^2(r-s)^2(r-t)^2(r-1)^2} (198s^2t^2 - 55s^3t^2 + 99rs^2 - 110rs^3 + 33rs^4 + 462rt^2 - 198s \\
&\quad t^2 + 198s^2t - 220s^3t + 66s^4t - 55s^3 + 66s^4 - 21s^5 - 396rst^2 + 396rs^2t - 110rs^3t + 99rs^2t^2 \\
&\quad - 396rst) , \\
D_{111}^{[1]} &= \frac{-h^3 t^6}{27720r^2(r-s)^2(r-t)^2(r-1)^2} (198s^2t^2 - 55s^2t^3 + 462rs^2 + 99rt^2 - 110rt^3 + 33rt^4 + 198s \\
&\quad t^2 - 198s^2t - 220st^3 + 66st^4 - 55t^3 + 66t^4 - 21t^5 + 396rst^2 - 396rs^2t - 110rst^3 + 99rs^2t^2 \\
&\quad - 396rst) , \\
D_{121}^{[1]} &= \frac{-h^3}{27720r^2(r-s)^2(r-t)^2(r-1)^2} (33r + 66s + 66t - 198s^2t^2 - 110rs - 110rt - 220st + 99rs^2 \\
&\quad + 99rt^2 + 198st^2 + 198s^2t - 55s^2 - 55t^2 - 396rst^2 - 396rs^2t + 462rs^2t^2 + 396rst - 21) , \\
D_{131}^{[1]} &= \frac{-h^2 r^2}{2520(r-s)^2(r-t)^2(r-1)^2} (28r^6 - 70r^5s - 70r^5t - 70r^5 + 45r^4s^2 + 180r^4st + 180r^4s + 45 \\
&\quad r^4t^2 + 180r^4t + 45r^4 - 120r^3s^2t - 120r^3s^2 - 120r^3st^2 - 480r^3st - 120r^3s - 120r^3t^2 - 120r^3 \\
&\quad t + 84r^2s^2t^2 + 336r^2s^2t + 84r^2s^2 + 336r^2st^2 + 336r^2st + 84r^2t^2 - 252rs^2t^2 - 252rs^2t - 252 \\
&\quad rst^2 + 210s^2t^2) , \\
D_{141}^{[1]} &= \frac{-h^2 s^5}{2520r^2(r-s)^2(r-t)^2(r-1)^2} (48s^2t^2 - 15s^3t^2 + 24rs^2 - 30rs^3 + 10rs^4 + 84rt^2 - 42st^2 + 48 \\
&\quad s^2t - 60s^3t + 20s^4t - 15s^3 + 20s^4 - 7s^5 - 84rst^2 + 96rs^2t - 30rs^3t + 24rs^2t^2 - 84rst) , \\
D_{151}^{[1]} &= \frac{-h^2 t^5}{2520r^2(r-s)^2(r-t)^2(r-1)^2} (48s^2t^2 - 15s^2t^3 + 84rs^2 + 24rt^2 - 30rt^3 + 10rt^4 + 48st^2 - 42 \\
&\quad s^2t - 60st^3 + 20st^4 - 15t^3 + 20t^4 - 7t^5 + 96rst^2 - 84rs^2t - 30rst^3 + 24rs^2t^2 - 84rst) , \\
D_{161}^{[1]} &= \frac{-h^2}{2520r^2(r-s)^2(r-t)^2(r-1)^2} (10r + 20s + 20t - 42s^2t^2 - 30rs - 30rt - 60st + 24rs^2 + 24 \\
&\quad rt^2 + 48st^2 + 48s^2t - 15s^2 - 15t^2 - 84rst^2 - 84rs^2t + 84rs^2t^2 + 96rst - 7) , \\
D_{12}^{[1]} &= \frac{-h^5 r^8}{2162160s^2(r-s)^2(s-t)^2(s-1)^2} (572r^2t^2 - 130r^3t^2 + 286r^2s - 260r^3s + 65r^4s - 715rt^2 + \\
&\quad 572r^2t - 520r^3t + 130r^4t + 2145st^2 - 130r^3 + 130r^4 - 35r^5 - 1430rst^2 + 1144r^2st - 260r^3 \\
&\quad st + 286r^2st^2 - 1430rst) , \\
D_{22}^{[1]} &= \frac{-h^5 s^5}{1081080(r-s)^2(s-t)^2(s-1)^2} (78r^2s^4 - 286r^2s^3t - 286r^2s^3 + 286r^2s^2t^2 + 1144r^2s^2t + \\
&\quad 286r^2s^2 - 1287r^2st^2 - 1287r^2st + 1716r^2t^2 - 91rs^5 + 312rs^4t + 312rs^4 - 286rs^3t^2 - 1144 \\
&\quad rs^3t - 286rs^3 + 1144rs^2t^2 + 1144rs^2t - 1287rst^2 + 28s^6 - 91s^5t - 91s^5 + 78s^4t^2 + 312s^4t \\
&\quad + 78s^4 - 286s^3t^2 - 286s^3t + 286s^2t^2) , \\
D_{32}^{[1]} &= \frac{-h^5 t^8}{2162160s^2(r-s)^2(s-t)^2(s-1)^2} (572r^2t^2 - 130r^2t^3 + 2145r^2s + 572rt^2 - 715r^2t - 520r \\
&\quad t^3 + 130rt^4 + 286st^2 - 260st^3 + 65st^4 - 130t^3 + 130t^4 - 35t^5 + 1144rst^2 - 1430r^2st - 260 \\
&\quad rst^3 + 286r^2st^2 - 1430rst) , \\
D_{42}^{[1]} &= \frac{-h^5}{2162160s^2(r-s)^2(s-t)^2(s-1)^2} (130r + 65s + 130t - 715r^2t^2 - 260rs - 520rt - 260st + \\
&\quad 286r^2s + 572rt^2 + 572r^2t + 286st^2 - 130r^2 - 130t^2 - 1430rst^2 - 1430r^2st + 2145r^2st^2 + \\
&\quad 1144rst - 35) , \\
D_{52}^{[1]} &= \frac{-h^4 r^7}{55440s^2(r-s)^2(s-t)^2(s-1)^2} (88r^2t^2 - 22r^3t^2 + 44r^2s - 44r^3s + 12r^4s - 99rt^2 + 88r^2t \\
&\quad - 88r^3t + 24r^4t + 264st^2 - 22r^3 + 24r^4 - 7r^5 - 198rst^2 + 176r^2st - 44r^3st + 44r^2st^2 - \\
&\quad 198rst) ,
\end{aligned}$$

$$\begin{aligned}
D_{62}^{[1]} &= \frac{-h^4 s^4}{55440(r-s)^2(s-t)^2(s-1)^2} (33r^2 s^4 - 110r^2 s^3 t - 110r^2 s^3 + 99r^2 s^2 t^2 + 396r^2 s^2 t + 99r^2 s^2 - 396r^2 st^2 - 396r^2 st + 462r^2 t^2 - 42rs^5 + 132rs^4 t + 132rs^4 - 110rs^3 t^2 - 440rs^3 t - 110rs^3 + 396rs^2 t^2 + 396rs^2 t - 396rst^2 + 14s^6 - 42s^5 t - 42s^5 + 33s^4 t^2 + 132s^4 t + 33s^4 - 110s^3 t^2 - 110s^3 t + 99s^2 t^2) , \\
D_{72}^{[1]} &= \frac{-h^4 t^7}{55440s^2(r-s)^2(s-t)^2(s-1)^2} (88r^2 t^2 - 22r^2 t^3 + 264r^2 s + 88rt^2 - 99r^2 t - 88rt^3 + 24rt^4 + 44st^2 - 44st^3 + 12st^4 - 22t^3 + 24t^4 - 7t^5 + 176rst^2 - 198r^2 st - 44rst^3 + 44r^2 st^2 - 198rst) , \\
D_{82}^{[1]} &= \frac{-h^4}{55440s^2(r-s)^2(s-t)^2(s-1)^2} (24r + 12s + 24t - 99r^2 t^2 - 44rs - 88rt - 44st + 44r^2 s + 88rt^2 + 88r^2 t + 44st^2 - 22r^2 - 22t^2 - 198rst^2 - 198r^2 st + 264r^2 st^2 + 176rst - 7) , \\
D_{92}^{[1]} &= \frac{-h^3 r^6}{27720s^2(r-s)^2(s-t)^2(s-1)^2} (198r^2 t^2 - 55r^3 t^2 + 99r^2 s - 110r^3 s + 33r^4 s - 198rt^2 + 198r^2 t - 220r^3 t + 66r^4 t + 462st^2 - 55r^3 + 66r^4 - 21r^5 - 396rst^2 + 396r^2 st - 110r^3 st + 99r^2 s t^2 - 396rst) , \\
D_{102}^{[1]} &= \frac{-h^3 s^3}{13860(r-s)^2(s-t)^2(s-1)^2} (55r^2 s^4 - 165r^2 s^3 t - 165r^2 s^3 + 132r^2 s^2 t^2 + 528r^2 s^2 t + 132r^2 s^2 - 462r^2 st^2 - 462r^2 st + 462r^2 t^2 - 77rs^5 + 220rs^4 t + 220rs^4 - 165rs^3 t^2 - 660rs^3 t - 165rs^3 + 528rs^2 t^2 + 528rs^2 t - 462rst^2 + 28s^6 - 77s^5 t - 77s^5 + 55s^4 t^2 + 220s^4 t + 55s^4 - 165s^3 t^2 - 165s^3 t + 132s^2 t^2) , \\
D_{112}^{[1]} &= \frac{-h^3 t^6}{27720s^2(r-s)^2(s-t)^2(s-1)^2} (198r^2 t^2 - 55r^2 t^3 + 462r^2 s + 198rt^2 - 198r^2 t - 220rt^3 + 66rt^4 + 99st^2 - 110st^3 + 33st^4 - 55t^3 + 66t^4 - 21t^5 + 396rst^2 - 396r^2 st - 110rst^3 + 99r^2 st^2 - 396rst) , \\
D_{122}^{[1]} &= \frac{-h^3}{27720s^2(r-s)^2(s-t)^2(s-1)^2} (66r + 33s + 66t - 198r^2 t^2 - 110rs - 220rt - 110st + 99r^2 s + 198rt^2 + 198r^2 t + 99st^2 - 55r^2 - 55t^2 - 396rst^2 - 396r^2 st + 462r^2 st^2 + 396rst - 21) , \\
D_{132}^{[1]} &= \frac{-h^2 r^5}{2520s^2(r-s)^2(s-t)^2(s-1)^2} (48r^2 t^2 - 15r^3 t^2 + 24r^2 s - 30r^3 s + 10r^4 s - 42rt^2 + 48r^2 t - 60r^3 t + 20r^4 t + 84st^2 - 15r^3 + 20r^4 - 7r^5 - 84rst^2 + 96r^2 st - 30r^3 st + 24r^2 st^2 - 84rst) , \\
D_{142}^{[1]} &= \frac{-h^2 s^2}{2520(r-s)^2(s-t)^2(s-1)^2} (45r^2 s^4 - 120r^2 s^3 t - 120r^2 s^3 + 84r^2 s^2 t^2 + 336r^2 s^2 t + 84r^2 s^2 - 252r^2 st^2 - 252r^2 st + 210r^2 t^2 - 70rs^5 + 180rs^4 t + 180rs^4 - 120rs^3 t^2 - 480rs^3 t - 120rs^3 + 336rs^2 t^2 + 336rs^2 t - 252rst^2 + 28s^6 - 70s^5 t - 70s^5 + 45s^4 t^2 + 180s^4 t + 45s^4 - 120s^3 t^2 - 120s^3 t + 84s^2 t^2) , \\
D_{152}^{[1]} &= \frac{-h^2 t^5}{2520s^2(r-s)^2(s-t)^2(s-1)^2} (48r^2 t^2 - 15r^2 t^3 + 84r^2 s + 48rt^2 - 42r^2 t - 60rt^3 + 20rt^4 + 24st^2 - 30st^3 + 10st^4 - 15t^3 + 20t^4 - 7t^5 + 96rst^2 - 84r^2 st - 30rst^3 + 24r^2 st^2 - 84rst) , \\
D_{162}^{[1]} &= \frac{-h^2}{2520s^2(r-s)^2(s-t)^2(s-1)^2} (20r + 10s + 20t - 42r^2 t^2 - 30rs - 60rt - 30st + 24r^2 s + 48rt^2 + 48r^2 t + 24st^2 - 15r^2 - 15t^2 - 84rst^2 - 84r^2 st + 84r^2 st^2 + 96rst - 7) , \\
D_{13}^{[1]} &= \frac{-h^5 r^8}{2162160t^2(r-t)^2(s-t)^2(t-1)^2} (572r^2 s^2 - 130r^3 s^2 - 715rs^2 + 572r^2 s - 520r^3 s + 130r^4 s + 286r^2 t - 260r^3 t + 65r^4 t + 2145s^2 t - 130r^3 + 130r^4 - 35r^5 - 1430rs^2 t + 1144r^2 st - 260r^3 st + 286r^2 s^2 t - 1430rst) ,
\end{aligned}$$

$$\begin{aligned}
D_{23}^{[1]} &= \frac{-h^5 s^8}{2162160t^2(r-t)^2(s-t)^2(t-1)^2} (572r^2s^2 - 130r^2s^3 + 572rs^2 - 715r^2s - 520rs^3 + 130rs^4 \\
&\quad + 2145r^2t + 286s^2t - 260s^3t + 65s^4t - 130s^3 + 130s^4 - 35s^5 + 1144rs^2t - 1430r^2st - 260r \\
&\quad s^3t + 286r^2s^2t - 1430rst) , \\
D_{33}^{[1]} &= \frac{-h^5 t^5}{1081080(r-t)^2(s-t)^2(t-1)^2} (286r^2s^2t^2 - 1287r^2s^2t + 1716r^2s^2 - 286r^2st^3 + 1144r^2st^2 \\
&\quad - 1287r^2st + 78r^2t^4 - 286r^2t^3 + 286r^2t^2 - 286rs^2t^3 + 1144rs^2t^2 - 1287rs^2t + 312rst^4 - \\
&\quad 1144rst^3 + 1144rst^2 - 91rt^5 + 312rt^4 - 286rt^3 + 78s^2t^4 - 286s^2t^3 + 286s^2t^2 - 91st^5 + 312 \\
&\quad st^4 - 286st^3 + 28t^6 - 91t^5 + 78t^4) , \\
D_{43}^{[1]} &= \frac{-h^5}{2162160t^2(r-t)^2(s-t)^2(t-1)^2} (130r + 130s + 65t - 715r^2s^2 - 520rs - 260rt - 260st + \\
&\quad 572rs^2 + 572r^2s + 286r^2t + 286s^2t - 130r^2 - 130s^2 - 1430rs^2t - 1430r^2st + 2145r^2s^2t + \\
&\quad 1144rst - 35) , \\
D_{53}^{[1]} &= \frac{-h^4 r^7}{55440t^2(r-t)^2(s-t)^2(t-1)^2} (88r^2s^2 - 22r^3s^2 - 99rs^2 + 88r^2s - 88r^3s + 24r^4s + 44r^2t \\
&\quad - 44r^3t + 12r^4t + 264s^2t - 22r^3 + 24r^4 - 7r^5 - 198rs^2t + 176r^2st - 44r^3st + 44r^2s^2t - \\
&\quad 198rst) , \\
D_{63}^{[1]} &= \frac{-h^4 s^7}{55440t^2(r-t)^2(s-t)^2(t-1)^2} (88r^2s^2 - 22r^2s^3 + 88rs^2 - 99r^2s - 88rs^3 + 24rs^4 + 264r^2 \\
&\quad t + 44s^2t - 44s^3t + 12s^4t - 22s^3 + 24s^4 - 7s^5 + 176rs^2t - 198r^2st - 44rs^3t + 44r^2s^2t - \\
&\quad 198rst) , \\
D_{73}^{[1]} &= \frac{-h^4 t^4}{55440(r-t)^2(s-t)^2(t-1)^2} (99r^2s^2t^2 - 396r^2s^2t + 462r^2s^2 - 110r^2st^3 + 396r^2st^2 - 396 \\
&\quad r^2st + 33r^2t^4 - 110r^2t^3 + 99r^2t^2 - 110rs^2t^3 + 396rs^2t^2 - 396rs^2t + 132rst^4 - 440rst^3 + \\
&\quad 396rst^2 - 42rt^5 + 132rt^4 - 110rt^3 + 33s^2t^4 - 110s^2t^3 + 99s^2t^2 - 42st^5 + 132st^4 - 110st^3 + \\
&\quad 14t^6 - 42t^5 + 33t^4) , \\
D_{83}^{[1]} &= \frac{-h^4}{55440t^2(r-t)^2(s-t)^2(t-1)^2} (24r + 24s + 12t - 99r^2s^2 - 88rs - 44rt - 44st + 88rs^2 + \\
&\quad 88r^2s + 44r^2t + 44s^2t - 22r^2 - 22s^2 - 198rs^2t - 198r^2st + 264r^2s^2t + 176rst - 7) , \\
D_{93}^{[1]} &= \frac{-h^3 r^6}{27720t^2(r-t)^2(s-t)^2(t-1)^2} (198r^2s^2 - 55r^3s^2 - 198rs^2 + 198r^2s - 220r^3s + 66r^4s + \\
&\quad 99r^2t - 110r^3t + 33r^4t + 462s^2t - 55r^3 + 66r^4 - 21r^5 - 396rs^2t + 396r^2st - 110r^3st + \\
&\quad 99r^2s^2t - 396rst) , \\
D_{103}^{[1]} &= \frac{-h^3 s^6}{27720t^2(r-t)^2(s-t)^2(t-1)^2} (198r^2s^2 - 55r^2s^3 + 198rs^2 - 198r^2s - 220rs^3 + 66rs^4 + 462 \\
&\quad r^2t + 99s^2t - 110s^3t + 33s^4t - 55s^3 + 66s^4 - 21s^5 + 396rs^2t - 396r^2st - 110rs^3t + 99r^2s^2t \\
&\quad - 396rst) , \\
D_{113}^{[1]} &= \frac{-h^3 t^3}{13860(r-t)^2(s-t)^2(t-1)^2} (132r^2s^2t^2 - 462r^2s^2t + 462r^2s^2 - 165r^2st^3 + 528r^2st^2 - 462r^2 \\
&\quad st + 55r^2t^4 - 165r^2t^3 + 132r^2t^2 - 165rs^2t^3 + 528rs^2t^2 - 462rs^2t + 220rst^4 - 660rst^3 + 528 \\
&\quad rst^2 - 77rt^5 + 220rt^4 - 165rt^3 + 55s^2t^4 - 165s^2t^3 + 132s^2t^2 - 77st^5 + 220st^4 - 165st^3 + 28 \\
&\quad t^6 - 77t^5 + 55t^4) , \\
D_{123}^{[1]} &= \frac{-h^3}{27720t^2(r-t)^2(s-t)^2(t-1)^2} (66r + 66s + 33t - 198r^2s^2 - 220rs - 110rt - 110st + 198rs^2 \\
&\quad + 198r^2s + 99r^2t + 99s^2t - 55r^2 - 55s^2 - 396rs^2t - 396r^2st + 462r^2s^2t + 396rst - 21) , \\
D_{133}^{[1]} &= \frac{-h^2 r^5}{2520t^2(r-t)^2(s-t)^2(t-1)^2} (48r^2s^2 - 15r^3s^2 - 42rs^2 + 48r^2s - 60r^3s + 20r^4s + 24r^2t -
\end{aligned}$$



$$\begin{aligned}
& 30r^3t + 10r^4t + 84s^2t - 15r^3 + 20r^4 - 7r^5 - 84rs^2t + 96r^2st - 30r^3st + 24r^2s^2t - 84rst) , \\
D_{143}^{[1]} &= \frac{-h^2s^5}{2520t^2(r-t)^2(s-t)^2(t-1)^2} (48r^2s^2 - 15r^2s^3 + 48rs^2 - 42r^2s - 60rs^3 + 20rs^4 + 84r^2t + \\
& 24s^2t - 30s^3t + 10s^4t - 15s^3 + 20s^4 - 7s^5 + 96rs^2t - 84r^2st - 30rs^3t + 24r^2s^2t - 84rst) , \\
D_{153}^{[1]} &= \frac{-h^2t^2}{2520(r-t)^2(s-t)^2(t-1)^2} (84r^2s^2t^2 - 252r^2s^2t + 210r^2s^2 - 120r^2st^3 + 336r^2st^2 - 252r^2 \\
& st + 45r^2t^4 - 120r^2t^3 + 84r^2t^2 - 120rs^2t^3 + 336rs^2t^2 - 252rs^2t + 180rst^4 - 480rst^3 + 336 \\
& rst^2 - 70rt^5 + 180rt^4 - 120rt^3 + 45s^2t^4 - 120s^2t^3 + 84s^2t^2 - 70st^5 + 180st^4 - 120st^3 + 28 \\
& t^6 - 70t^5 + 45t^4) , \\
D_{163}^{[1]} &= \frac{-h^2}{2520t^2(r-t)^2(s-t)^2(t-1)^2} (20r + 20s + 10t - 42r^2s^2 - 60rs - 30rt - 30st + 48rs^2 + 48 \\
& r^2s + 24r^2t + 24s^2t - 15r^2 - 15s^2 - 84rs^2t - 84r^2st + 84r^2s^2t + 96rst - 7) , \\
D_{14}^{[1]} &= \frac{-h^5r^8}{2162160(r-1)^2(s-1)^2(t-1)^2} (-35r^5 + 130r^4s + 130r^4t + 65r^4 - 130r^3s^2 - 520r^3st - 260 \\
& r^3s - 130r^3t^2 - 260r^3t + 572r^2s^2t + 286r^2s^2 + 572r^2st^2 + 1144r^2st + 286r^2t^2 - 715rs^2t^2 - \\
& 1430rs^2t - 1430rst^2 + 2145s^2t^2) , \\
D_{24}^{[1]} &= \frac{-h^5s^8}{2162160(r-1)^2(s-1)^2(t-1)^2} (-130r^2s^3 + 572r^2s^2t + 286r^2s^2 - 715r^2st^2 - 1430r^2st + \\
& 2145r^2t^2 + 130rs^4 - 520rs^3t - 260rs^3 + 572rs^2t^2 + 1144rs^2t - 1430rst^2 - 35s^5 + 130s^4t + \\
& 65s^4 - 130s^3t^2 - 260s^3t + 286s^2t^2) , \\
D_{34}^{[1]} &= \frac{-h^5t^8}{2162160(r-1)^2(s-1)^2(t-1)^2} (-715r^2s^2t + 2145r^2s^2 + 572r^2st^2 - 1430r^2st - 130r^2t^3 + \\
& 286r^2t^2 + 572rs^2t^2 - 1430rs^2t - 520rst^3 + 1144rst^2 + 130rt^4 - 260rt^3 - 130s^2t^3 + 286s^2t^2 \\
& + 130st^4 - 260st^3 - 35t^5 + 65t^4) , \\
D_{44}^{[1]} &= \frac{-h^5}{1081080(r-1)^2(s-1)^2(t-1)^2} (1716r^2s^2t^2 - 1287r^2s^2t + 286r^2s^2 - 1287r^2st^2 + 1144r^2s \\
& t - 286r^2s + 286r^2t^2 - 286r^2t + 78r^2 - 1287rs^2t^2 + 1144rs^2t - 286rs^2 + 1144rst^2 - 1144r \\
& st + 312rs - 286rt^2 + 312rt - 91r + 286s^2t^2 - 286s^2t + 78s^2 - 286st^2 + 312st - 91s + 78 \\
& t^2 - 91t + 28) , \\
D_{54}^{[1]} &= \frac{-h^4r^7}{55440(r-1)^2(s-1)^2(t-1)^2} (-7r^5 + 24r^4s + 24r^4t + 12r^4 - 22r^3s^2 - 88r^3st - 44r^3s - \\
& 22r^3t^2 - 44r^3t + 88r^2s^2t + 44r^2s^2 + 88r^2st^2 + 176r^2st + 44r^2t^2 - 99rs^2t^2 - 198rs^2t - 198 \\
& rst^2 + 264s^2t^2) , \\
D_{64}^{[1]} &= \frac{-h^4s^7}{55440(r-1)^2(s-1)^2(t-1)^2} (-22r^2s^3 + 88r^2s^2t + 44r^2s^2 - 99r^2st^2 - 198r^2st + 264r^2t^2 \\
& + 24rs^4 - 88rs^3t - 44rs^3 + 88rs^2t^2 + 176rs^2t - 198rst^2 - 7s^5 + 24s^4t + 12s^4 - 22s^3t^2 - 44 \\
& s^3t + 44s^2t^2) , \\
D_{74}^{[1]} &= \frac{-h^4t^7}{55440(r-1)^2(s-1)^2(t-1)^2} (-99r^2s^2t + 264r^2s^2 + 88r^2st^2 - 198r^2st - 22r^2t^3 + 44r^2t^2 + \\
& 88rs^2t^2 - 198rs^2t - 88rst^3 + 176rst^2 + 24rt^4 - 44rt^3 - 22s^2t^3 + 44s^2t^2 + 24st^4 - 44st^3 - \\
& 7t^5 + 12t^4) , \\
D_{84}^{[1]} &= \frac{-h^4}{55440(r-1)^2(s-1)^2(t-1)^2} (462r^2s^2t^2 - 396r^2s^2t + 99r^2s^2 - 396r^2st^2 + 396r^2st - 110r^2s \\
& + 99r^2t^2 - 110r^2t + 33r^2 - 396rs^2t^2 + 396rs^2t - 110rs^2 + 396rst^2 - 440rst + 132rs - 110rt^2 \\
& + 132rt - 42r + 99s^2t^2 - 110s^2t + 33s^2 - 110st^2 + 132st - 42s + 33t^2 - 42t + 14) , \\
D_{94}^{[1]} &= \frac{-h^3r^6}{27720(r-1)^2(s-1)^2(t-1)^2} (-21r^5 + 66r^4s + 66r^4t + 33r^4 - 55r^3s^2 - 220r^3st - 110r^3s -
\end{aligned}$$

$$\begin{aligned}
& 55r^3t^2 - 110r^3t + 198r^2s^2t + 99r^2s^2 + 198r^2st^2 + 396r^2st + 99r^2t^2 - 198rs^2t^2 - 396rs^2t - \\
& 396rst^2 + 462s^2t^2) , \\
D_{104}^{[1]} &= \frac{-h^3s^6}{27720(r-1)^2(s-1)^2(t-1)^2} (-55r^2s^3 + 198r^2s^2t + 99r^2s^2 - 198r^2st^2 - 396r^2st + 462r^2t^2 \\
& + 66rs^4 - 220rs^3t - 110rs^3 + 198rs^2t^2 + 396rs^2t - 396rst^2 - 21s^5 + 66s^4t + 33s^4 - 55s^3t^2 - \\
& 110s^3t + 99s^2t^2) , \\
D_{114}^{[1]} &= \frac{-h^3t^6}{27720(r-1)^2(s-1)^2(t-1)^2} (-198r^2s^2t + 462r^2s^2 + 198r^2st^2 - 396r^2st - 55r^2t^3 + 99r^2t^2 \\
& + 198rs^2t^2 - 396rs^2t - 220rst^3 + 396rst^2 + 66rt^4 - 110rt^3 - 55s^2t^3 + 99s^2t^2 + 66st^4 - 110s \\
& t^3 - 21t^5 + 33t^4) , \\
D_{124}^{[1]} &= \frac{-h^3}{13860(r-1)^2(s-1)^2(t-1)^2} (462r^2s^2t^2 - 462r^2s^2t + 132r^2s^2 - 462r^2st^2 + 528r^2st - 165r^2 \\
& s + 132r^2t^2 - 165r^2t + 55r^2 - 462rs^2t^2 + 528rs^2t - 165rs^2 + 528rst^2 - 660rst + 220rs - 165 \\
& rt^2 + 220rt - 77r + 132s^2t^2 - 165s^2t + 55s^2 - 165st^2 + 220st - 77s + 55t^2 - 77t + 28) , \\
D_{134}^{[1]} &= \frac{-h^2r^5}{2520(r-1)^2(s-1)^2(t-1)^2} (-7r^5 + 20r^4s + 20r^4t + 10r^4 - 15r^3s^2 - 60r^3st - 30r^3s - 15r^3t^2 \\
& - 30r^3t + 48r^2s^2t + 24r^2s^2 + 48r^2st^2 + 96r^2st + 24r^2t^2 - 42rs^2t^2 - 84rs^2t - 84rst^2 + 84s^2t^2) , \\
D_{144}^{[1]} &= \frac{-h^2s^5}{2520(r-1)^2(s-1)^2(t-1)^2} (-15r^2s^3 + 48r^2s^2t + 24r^2s^2 - 42r^2st^2 - 84r^2st + 84r^2t^2 + 20rs^4 \\
& - 60rs^3t - 30rs^3 + 48rs^2t^2 + 96rs^2t - 84rst^2 - 7s^5 + 20s^4t + 10s^4 - 15s^3t^2 - 30s^3t + 24s^2t^2) , \\
D_{154}^{[1]} &= \frac{-h^2t^5}{2520(r-1)^2(s-1)^2(t-1)^2} (-42r^2s^2t + 84r^2s^2 + 48r^2st^2 - 84r^2st - 15r^2t^3 + 24r^2t^2 + 48rs^2 \\
& t^2 - 84rs^2t - 60rst^3 + 96rst^2 + 20rt^4 - 30rt^3 - 15s^2t^3 + 24s^2t^2 + 20st^4 - 30st^3 - 7t^5 + 10t^4) , \\
D_{164}^{[1]} &= \frac{-h^2}{2520(r-1)^2(s-1)^2(t-1)^2} (210r^2s^2t^2 - 252r^2s^2t + 84r^2s^2 - 252r^2st^2 + 336r^2st - 120r^2s + \\
& 84r^2t^2 - 120r^2t + 45r^2 - 252rs^2t^2 + 336rs^2t - 120rs^2 + 336rst^2 - 480rst + 180rs - 120rt^2 + \\
& 180rt - 70r + 84s^2t^2 - 120s^2t + 45s^2 - 120st^2 + 180st - 70s + 45t^2 - 70t + 28)
\end{aligned}$$
