# Supplementary material for: Generalized Hybrid One-Step Block Method Involving Fifth Derivative for Solving Fourth-Order Ordinary Differential Equation Directly
Source: Hindawi journal article supplement (doi:10.1155/2017/7637651), 2017-01-01
Supplement: f1 [file 7637651.f1.zip]

Archive with 2 entries (2 files):
- Supplementary Files/Supplementary Materials_JAM_2075434.pdf
- Supplementary Files/Supplementary Materials_JAM_2075435.tex
