# Supplementary material for: Generalized Hybrid One-Step Block Method Involving Fifth Derivative for Solving Fourth-Order Ordinary Differential Equation Directly
Source: Hindawi journal article supplement (doi:10.1155/2017/7637651), 2017-01-01
Supplement: f1 [file 7637651.f1.zip › Supplementary Files/Supplementary Materials_JAM_2075435.tex]

% !TeX spellcheck = en_GB
\documentclass[10pt]{article}
\usepackage{multirow}
\usepackage{amsmath,bm}
\usepackage{booktabs}
\usepackage{lipsum}
\usepackage{amsthm}
\usepackage{pdfpages}
\setlength{\parindent}{0pt}
\usepackage{amsmath,amsfonts,amssymb,epsfig,epstopdf,titling,url,array}
\usepackage{multicol}
\theoremstyle{plain}
\newtheorem{thm}{Theorem}[section]
\newtheorem{lem}[thm]{Lemma}
\newtheorem{prop}[thm]{Proposition}
\newtheorem*{cor}{Corollary}

\theoremstyle{definition}
\newtheorem{defn}{Definition}[section]
\newtheorem{conj}{Conjecture}[section]
\newtheorem{exmp}{Example}[section]

\theoremstyle{remark}
\newtheorem*{rem}{Remark}
\newtheorem*{note}{Note}

\usepackage{geometry}
\setcounter{MaxMatrixCols}{20}
\renewcommand{\baselinestretch}{1} 

\setcounter{page}{1} 

\setlength{\textheight}{21.6cm} 

\setlength{\textwidth}{14cm} 


\begin{document} 
    
    \textbf{Appendix I}\\\\
    $
    \alpha_0 =\frac{(x_n - x + hr)(x_n - x + hs)(x_n - x + ht)}{h^3rst},\quad \alpha_r=\frac{(x - x_n)(x_n - x + hs)(x_n - x + ht)}{h^3r(r - s)(r - t)},\\\\
    \alpha_s =\frac{-(x - x_n)(x_n - x + hr)(x_n - x + ht)}{h^3s(r - s)(s - t)},\qquad \alpha_t=\frac{(x - x_n)(x_n - x + hr)(x_n - x + hs)}{h^3t(r - t)(s - t)},\\\\
    \beta_0 =(x - x_n)^4/24 + ((x - x_n)^7(r^3s^3 + r^3t^3 + s^3t^3 + 4rs^2t^3 + 4rs^3t^2 + 4r^2st^3 + 4r^2s^3t + 4r^3st^2 + 4r^3s^2t + 4rs^3t^3 + 4r^3st^3 + 4r^3s^3t + 8r^2s^2t^2 + 8r^2s^2t^3 + 8r^2s^3t^2 + 8r^3s^2t^2 + 4r^2s^3t^3 + 4r^3s^2t^3 + 4r^3s^3t^2 + r^3s^3t^3))/(420h^3r^3s^3t^3) - ((x - x_n)^{10}(16r^2s^2 + 4r^2s^3 + 4r^3s^2 + 16r^2t^2 + 4r^2t^3 + 4r^3t^2 + 16s^2t^2 + 4s^2t^3 + 4s^3t^2 + 4rs^2 + 4r^2s + 4rs^3 + 4r^3s + 4rt^2 + 4r^2t + 4rt^3 + 4r^3t + 4st^2 + 4s^2t + 4st^3 + 4s^3t + 36rst^2 + 36rs^2t + 36r^2st + 11rst^3 + 11rs^3t + 11r^3st + 36rs^2t^2 + 36r^2st^2 + 36r^2s^2t + 4rs^2t^3 + 4rs^3t^2 + 4r^2st^3 + 4r^2s^3t + 4r^3st^2 + 4r^3s^2t + 11rst + 16r^2s^2t^2))/(5040h^6r^3s^3t^3) + ((x - x_n)^{11}(4r^2s^2 + 4r^2t^2 + 4s^2t^2 + rs + rt + st + 4rs^2 + 4r^2s + rs^3 + r^3s + 4rt^2 + 4r^2t + rt^3 + r^3t + 4st^2 + 4s^2t + st^3 + s^3t + 12rst^2 + 12rs^2t + 12r^2st + rst^3 + rs^3t + r^3st + 4rs^2t^2 + 4r^2st^2 + 4r^2s^2t + 12rst))/(3960h^7r^3s^3t^3) - (h(x - x_n)^3(546r^3s^7 - 884r^2s^8 + 546r^4s^6 + 546r^5s^5 + 546r^6s^4 + 546r^7s^3 - 884r^8s^2 + 780r^2s^9 - 364r^3s^8 - 364r^4s^7 - 364r^5s^6 - 364r^6s^5 - 364r^7s^4 - 364r^8s^3 + 780r^9s^2 - 190r^2s^{10} + 70r^3s^9 + 70r^4s^8 + 70r^5s^7 + 70r^6s^6 + 70r^7s^5 + 70r^8s^4 + 70r^9s^3 - 190r^{10}s^2 - 884r^2t^8 + 546r^3t^7 + 546r^4t^6 + 546r^5t^5 + 546r^6t^4 + 546r^7t^3 - 884r^8t^2 + 780r^2t^9 - 364r^3t^8 - 364r^4t^7 - 364r^5t^6 - 364r^6t^5 - 364r^7t^4 - 364r^8t^3 + 780r^9t^2 - 190r^2t^{10} + 70r^3t^9 + 70r^4t^8 + 70r^5t^7 + 70r^6t^6 + 70r^7t^5 + 70r^8t^4 + 70r^9t^3 - 190r^{10}t^2 - 884s^2t^8 + 546s^3t^7 + 546s^4t^6 + 546s^5t^5 + 546s^6t^4 + 546s^7t^3 - 884s^8t^2 + 780s^2t^9 - 364s^3t^8 - 364s^4t^7 - 364s^5t^6 - 364s^6t^5 - 364s^7t^4 - 364s^8t^3 + 780s^9t^2 - 190s^2t^{10} + 70s^3t^9 + 70s^4t^8 + 70s^5t^7 + 70s^6t^6 + 70s^7t^5 + 70s^8t^4 + 70s^9t^3 - 190s^{10}t^2 + 260rs^9 + 260r^9s - 260rs^{10} - 260r^{10}s + 70rs^{11} + 70r^{11}s + 260rt^9 + 260r^9t - 260rt^{10} - 260r^{10}t + 70rt^{11} + 70r^{11}t + 260st^9 + 260s^9t - 260st^{10} - 260s^{10}t + 70st^{11} + 70s^{11}t - 1222rst^8 - 1222rs^8t - 1222r^8st + 1300rst^9 + 1300rs^9t + 1300r^9st - 505rst^{10} - 505rs^{10}t - 505r^{10}st + 70rst^{11} + 70rs^{11}t + 70r^{11}st + 2210rs^2t^7 - 1365rs^3t^6 - 1365rs^4t^5 - 1365rs^5t^4 - 1365rs^6t^3 + 2210rs^7t^2 + 2210r^2st^7 + 2210r^2s^7t - 1365r^3st^6 - 1365r^3s^6t - 1365r^4st^5 - 1365r^4s^5t - 1365r^5st^4 - 1365r^5s^4t - 1365r^6st^3 - 1365r^6s^3t + 2210r^7st^2 + 2210r^7s^2t - 2340rs^2t^8 + 1092rs^3t^7 + 1092rs^4t^6 + 1092rs^5t^5 + 1092rs^6t^4 + 1092rs^7t^3 - 2340rs^8t^2 - 2340r^2st^8 - 2340r^2s^8t + 1092r^3st^7 + 1092r^3s^7t + 1092r^4st^6 + 1092r^4s^6t + 1092r^5st^5 + 1092r^5s^5t + 1092r^6st^4 + 1092r^6s^4t + 1092r^7st^3 + 1092r^7s^3t - 2340r^8st^2 - 2340r^8s^2t + 1055rs^2t^9 - 427rs^3t^8 - 427rs^4t^7 - 427rs^5t^6 - 427rs^6t^5 - 427rs^7t^4 - 427rs^8t^3 + 1055rs^9t^2 + 1055r^2st^9 + 1055r^2s^9t - 427r^3st^8 - 427r^3s^8t - 427r^4st^7 - 427r^4s^7t - 427r^5st^6 - 427r^5s^6t - 427r^6st^5 - 427r^6s^5t - 427r^7st^4 - 427r^7s^4t - 427r^8st^3 - 427r^8s^3t + 1055r^9st^2 + 1055r^9s^2t - 190rs^2t^{10} + 70rs^3t^9 + 70rs^4t^8 + 70rs^5t^7 + 70rs^6t^6 + 70rs^7t^5 + 70rs^8t^4 + 70rs^9t^3 - 190rs^{10}t^2 - 190r^2st^{10} - 190r^2s^{10}t + 70r^3st^9 + 70r^3s^9t + 70r^4st^8 + 70r^4s^8t + 70r^5st^7 + 70r^5s^7t + 70r^6st^6 + 70r^6s^6t + 70r^7st^5 + 70r^7s^5t + 70r^8st^4 + 70r^8s^4t + 70r^9st^3 + 70r^9s^3t - 190r^{10}st^2 - 190r^{10}s^2t + 2782r^2s^2t^6 - 9373r^2s^3t^5 - 9373r^2s^4t^4 - 9373r^2s^5t^3 + 2782r^2s^6t^2 - 9373r^3s^2t^5 + 55692r^3s^3t^4 + 55692r^3s^4t^3 - 9373r^3s^5t^2 - 9373r^4s^2t^4 + 55692r^4s^3t^3 - 9373r^4s^4t^2 - 9373r^5s^2t^3 - 9373r^5s^3t^2 + 2782r^6s^2t^2 + 884r^2s^2t^7 + 1456r^2s^3t^6 + 1456r^2s^4t^5 + 1456r^2s^5t^4 + 1456r^2s^6t^3 + 884r^2s^7t^2 + 1456r^3s^2t^6 - 6552r^3s^3t^5 - 6552r^3s^4t^4 - 6552r^3s^5t^3 + 1456r^3s^6t^2 + 1456r^4s^2t^5 - 6552r^4s^3t^4 - 6552r^4s^4t^3 + 1456r^4s^5t^2 + 1456r^5s^2t^4 - 6552r^5s^3t^3 + 1456r^5s^4t^2 + 1456r^6s^2t^3 + 1456r^6s^3t^2 + 884r^7s^2t^2 - 2065r^2s^2t^8 + 1029r^2s^3t^7 + 1029r^2s^4t^6 + 1029r^2s^5t^5 + 1029r^2s^6t^4 + 1029r^2s^7t^3 - 2065r^2s^8t^2 + 1029r^3s^2t^7 - 882r^3s^3t^6 - 882r^3s^4t^5 - 882r^3s^5t^4 - 882r^3s^6t^3 + 1029r^3s^7t^2 + 1029r^4s^2t^6 - 882r^4s^3t^5 - 882r^4s^4t^4 - 882r^4s^5t^3 + 1029r^4s^6t^2 + 1029r^5s^2t^5 - 882r^5s^3t^4 - 882r^5s^4t^3 + 1029r^5s^5t^2 + 1029r^6s^2t^4 - 882r^6s^3t^3 + 1029r^6s^4t^2 + 1029r^7s^2t^3 + 1029r^7s^3t^2 - 2065r^8s^2t^2 + 590r^2s^2t^9 - 294r^2s^3t^8 - 294r^2s^4t^7 - 294r^2s^5t^6 - 294r^2s^6t^5 - 294r^2s^7t^4 - 294r^2s^8t^3 + 590r^2s^9t^2 - 294r^3s^2t^8 + 252r^3s^3t^7 + 252r^3s^4t^6 + 252r^3s^5t^5 + 252r^3s^6t^4 + 252r^3s^7t^3 - 294r^3s^8t^2 - 294r^4s^2t^7 + 252r^4s^3t^6 + 252r^4s^4t^5 +\
    $
    $
    252r^4s^5t^4 + 252r^4s^6t^3 - 294r^4s^7t^2 - 294r^5s^2t^6 + 252r^5s^3t^5 + 252r^5s^4t^4 + 252r^5s^5t^3 - 294r^5s^6t^2 - 294r^6s^2t^5 + 252r^6s^3t^4 + 252r^6s^4t^3 - 294r^6s^5t^2 - 294r^7s^2t^4 + 252r^7s^3t^3 - 294r^7s^4t^2 - 294r^8s^2t^3 - 294r^8s^3t^2 + 590r^9s^2t^2))/(2162160r^3s^3t^3) + ((x - x_n)^{13}(rs + rt + st + rst))/(8580h^9r^3s^3t^3) - ((x - x_n)^6(3r^2s^2 + 3r^2t^2 + 3s^2t^2 + 4rst^2 + 4rs^2t + 4r^2st + 4rs^2t^2 + 4r^2st^2 + 4r^2s^2t + 3r^2s^2t^2))/(360h^2r^2s^2t^2) + ((x - x_n)^9(4r^2s^2 + 4r^2s^3 + 4r^3s^2 + r^3s^3 + 4r^2t^2 + 4r^2t^3 + 4r^3t^2 + r^3t^3 + 4s^2t^2 + 4s^2t^3 + 4s^3t^2 + s^3t^3 + rs^3 + r^3s + rt^3 + r^3t + st^3 + s^3t + 8rst^2 + 8rs^2t + 8r^2st + 8rst^3 + 8rs^3t + 8r^3st + 24rs^2t^2 + 24r^2st^2 + 24r^2s^2t + 8rs^2t^3 + 8rs^3t^2 + 8r^2st^3 + 8r^2s^3t + 8r^3st^2 + 8r^3s^2t + rs^3t^3 + r^3st^3 + r^3s^3t + 24r^2s^2t^2 + 4r^2s^2t^3 + 4r^2s^3t^2 + 4r^3s^2t^2))/(1512h^5r^3s^3t^3) - ((x - x_n)^{12}(4rs + 4rt + 4st + 4rs^2 + 4r^2s + 4rt^2 + 4r^2t + 4st^2 + 4s^2t + 4rst^2 + 4rs^2t + 4r^2st + 15rst))/(11880h^8r^3s^3t^3) + (h^2(x - x_n)^2(260r^2s^9 - 884r^3s^8 + 546r^4s^7 + 546r^5s^6 + 546r^6s^5 + 546r^7s^4 - 884r^8s^3 + 260r^9s^2 - 260r^2s^{10} + 780r^3s^9 - 364r^4s^8 - 364r^5s^7 - 364r^6s^6 - 364r^7s^5 - 364r^8s^4 + 780r^9s^3 - 260r^{10}s^2 + 70r^2s^{11} - 190r^3s^{10} + 70r^4s^9 + 70r^5s^8 + 70r^6s^7 + 70r^7s^6 + 70r^8s^5 + 70r^9s^4 - 190r^{10}s^3 + 70r^{11}s^2 + 260r^2t^9 - 884r^3t^8 + 546r^4t^7 + 546r^5t^6 + 546r^6t^5 + 546r^7t^4 - 884r^8t^3 + 260r^9t^2 - 260r^2t^{10} + 780r^3t^9 - 364r^4t^8 - 364r^5t^7 - 364r^6t^6 - 364r^7t^5 - 364r^8t^4 + 780r^9t^3 - 260r^{10}t^2 + 70r^2t^{11} - 190r^3t^{10} + 70r^4t^9 + 70r^5t^8 + 70r^6t^7 + 70r^7t^6 + 70r^8t^5 + 70r^9t^4 - 190r^{10}t^3 + 70r^{11}t^2 + 260s^2t^9 - 884s^3t^8 + 546s^4t^7 + 546s^5t^6 + 546s^6t^5 + 546s^7t^4 - 884s^8t^3 + 260s^9t^2 - 260s^2t^{10} + 780s^3t^9 - 364s^4t^8 - 364s^5t^7 - 364s^6t^6 - 364s^7t^5 - 364s^8t^4 + 780s^9t^3 - 260s^{10}t^2 + 70s^2t^{11} - 190s^3t^{10} + 70s^4t^9 + 70s^5t^8 + 70s^6t^7 + 70s^7t^6 + 70s^8t^5 + 70s^9t^4 - 190s^{10}t^3 + 70s^{11}t^2 + 520rst^9 + 520rs^9t + 520r^9st - 520rst^{10} - 520rs^{10}t - 520r^{10}st + 140rst^{11} + 140rs^{11}t + 140r^{11}st - 2106rs^2t^8 + 2756rs^3t^7 - 819rs^4t^6 - 819rs^5t^5 - 819rs^6t^4 + 2756rs^7t^3 - 2106rs^8t^2 - 2106r^2st^8 - 2106r^2s^8t + 2756r^3st^7 + 2756r^3s^7t - 819r^4st^6 - 819r^4s^6t - 819r^5st^5 - 819r^5s^5t - 819r^6st^4 - 819r^6s^4t + 2756r^7st^3 + 2756r^7s^3t - 2106r^8st^2 - 2106r^8s^2t + 2080rs^2t^9 - 2704rs^3t^8 + 728rs^4t^7 + 728rs^5t^6 + 728rs^6t^5 + 728rs^7t^4 - 2704rs^8t^3 + 2080rs^9t^2 + 2080r^2st^9 + 2080r^2s^9t - 2704r^3st^8 - 2704r^3s^8t + 728r^4st^7 + 728r^4s^7t + 728r^5st^6 + 728r^5s^6t + 728r^6st^5 + 728r^6s^5t + 728r^7st^4 + 728r^7s^4t - 2704r^8st^3 - 2704r^8s^3t + 2080r^9st^2 + 2080r^9s^2t - 695rs^2t^{10} + 1125rs^3t^9 - 357rs^4t^8 - 357rs^5t^7 - 357rs^6t^6 - 357rs^7t^5 - 357rs^8t^4 + 1125rs^9t^3 - 695rs^{10}t^2 - 695r^2st^{10} - 695r^2s^{10}t + 1125r^3st^9 + 1125r^3s^9t - 357r^4st^8 - 357r^4s^8t - 357r^5st^7 - 357r^5s^7t - 357r^6st^6 - 357r^6s^6t - 357r^7st^5 - 357r^7s^5t - 357r^8 st^4 - 357r^8s^4t + 1125r^9st^3 + 1125r^9s^3t - 695r^{10}st^2 - 695r^{10}s^2t + 70rs^2t^{11} - 190rs^3t^{10} + 70rs^4 t^9 + 70rs^5t^8 + 70rs^6t^7 + 70rs^7t^6 + 70rs^8t^5 + 70rs^9t^4 - 190rs^{10}t^3 + 70rs^{11}t^2 + 70r^2st^{11} + 70r^2 s^{11}t - 190r^3st^{10} - 190r^3s^{10}t + 70r^4st^9 + 70r^4s^9t + 70r^5st^8 + 70r^5s^8t + 70r^6st^7 + 70r^6s^7t + 70 r^7st^6 + 70r^7s^6t + 70r^8st^5 + 70r^8s^5t + 70r^9st^4 + 70r^9s^4t - 190r^{10}st^3 - 190r^{10}s^3t + 70r^{11}st^2 +  70r^{11}s^2t + 4420r^2s^2t^7 + 1417r^2s^3t^6 - 10738r^2s^4t^5 - 10738r^2s^5t^4 + 1417r^2s^6t^3 + 4420r^2s^7t^2 +  1417r^3s^2t^6 - 18746r^3s^3t^5 + 46319r^3s^4t^4 - 18746r^3s^5t^3 + 1417r^3s^6t^2 - 10738r^4s^2t^5 + 46319r^4s^3 t^4 + 46319r^4s^4t^3 - 10738r^4s^5t^2 - 10738r^5s^2t^4 - 18746r^5s^3t^3 - 10738r^5s^4t^2 + 1417r^6s^2t^3 + 1417 r^6s^3t^2 + 4420r^7s^2t^2 - 4680r^2s^2t^8 + 1976r^2s^3t^7 + 2548r^2s^4t^6 + 2548r^2s^5t^5 + 2548r^2s^6t^4 + 1976r^2 s^7t^3 - 4680r^2s^8t^2 + 1976r^3s^2t^7 + 2912r^3s^3t^6 - 5096r^3s^4t^5 - 5096r^3s^5t^4 + 2912r^3s^6t^3 + 1976r^3s^7 t^2 + 2548r^4s^2t^6 - 5096r^4s^3t^5 - 13104r^4s^4t^4 - 5096r^4s^5t^3 + 2548r^4s^6t^2 + 2548r^5s^2t^5 - 5096r^5s^3t^4  - 5096r^5s^4t^3 + 2548r^5s^5t^2 + 2548r^6s^2t^4 + 2912r^6s^3t^3 + 2548r^6s^4t^2 + 1976r^7s^2t^3 + 1976r^7s^3t^2 -  4680r^8s^2t^2 + 2110r^2s^2t^9 - 2492r^2s^3t^8 + 602r^2s^4t^7 + 602r^2s^5t^6 + 602r^2s^6t^5 + 602r^2s^7t^4 - 2492r^2 s^8t^3 + 2110r^2s^9t^2 - 2492r^3s^2t^8 + 2058r^3s^3t^7 + 147r^3s^4t^6 + 147r^3s^5t^5 + 147r^3s^6t^4 + 2058r^3s^7t^3 -  2492r^3s^8t^2 + 602r^4s^2t^7 + 147r^4s^3t^6 - 1764r^4s^4t^5 - 1764r^4s^5t^4 + 147r^4s^6t^3 + 602r^4s^7t^2 + 602r^5 s^2t^6 + 147r^5s^3t^5 - 1764r^5s^4t^4 + 147r^5s^5t^3 + 602r^5s^6t^2 + 602r^6s^2t^5 + 147r^6s^3t^4 + 147r^6s^4t^3 + 602 r^6s^5t^2 + 602r^7s^2t^4 + 2058r^7s^3t^3 + 602r^7s^4t^2 - 2492r^8s^2t^3 - 2492r^8s^3t^2 + 2110r^9s^2t^2 - 380r^2s^2t^{10}  + 660r^2s^3t^9 - 224r^2s^4t^8 - 224r^2s^5t^7 - 224r^2s^6t^6 - 224r^2s^7t^5 - 224r^2s^8t^4 + 660r^2s^9t^3 - 380r^2s^{10}t^2  + 660r^3s^2t^9 - 588r^3s^3t^8 - 42r^3s^4t^7 - 42r^3s^5t^6 - 42r^3s^6t^5 - 42r^3s^7t^4 - 588r^3s^8t^3 + 660r^3s^9t^2 - 224 r^4s^2t^8 - 42r^4s^3t^7 + 504r^4s^4t^6 + 504r^4s^5t^5 + 504r^4s^6t^4 - 42r^4s^7t^3 - 224r^4s^8t^2 - 224r^5s^2t^7 - 42r^5s^3 t^6 + 504r^5s^4t^5 + 504r^5s^5t^4 - 42r^5s^6t^3 - 224r^5s^7t^2 - 224r^6s^2t^6 - 42r^6s^3t^5 + 504r^6s^4t^4 - 42r^6s^5t^3 -  224r^6s^6t^2 - 224r^7s^2t^5 - 42r^7s^3t^4 - 42r^7s^4t^3 - 224r^7s^5t^2 - 224r^8s^2t^4 - 588r^8s^3t^3 - 224r^8s^4t^2 + 660 r^9s^2t^3 + 660r^9s^3t^2 - 380r^{10}s^2t^2))/(2162160r^3s^3t^3) - (h^3(x - x_n)(546r^3s^6 - 884r^2s^7 + 546r^4s^5 + 546 \\
    $
    $
    r^5s^4 + 546r^6s^3 - 884r^7s^2 + 780r^2s^8 - 364r^3s^7 - 364r^4s^6 - 364r^5s^5 - 364r^6s^4 - 364r^7s^3 + 780r^8s^2 - 190r^2s^9 + 70r^3s^8 + 70r^4s^7 + 70r^5s^6 + 70r^6s^5 + 70r^7s^4 + 70r^8s^3 - 190r^9s^2 - 884r^2t^7 + 546r^3t^6 + 546r^4t^5 + 546r^5t^4 + 546r^6t^3 - 884r^7t^2 + 780r^2t^8 - 364r^3t^7 - 364r^4t^6 - 364r^5t^5 - 364r^6t^4 - 364r^7t^3 + 780r^8t^2 - 190r^2t^9 + 70r^3t^8 + 70r^4t^7 + 70r^5t^6 + 70r^6t^5 + 70r^7t^4 + 70r^8t^3 - 190r^9t^2 - 884s^2t^7 + 546s^3t^6 + 546s^4t^5 + 546s^5t^4 + 546s^6t^3 - 884s^7t^2 + 780s^2t^8 - 364s^3t^7 - 364s^4t^6 - 364s^5t^5 - 364s^6t^4 - 364s^7t^3 + 780s^8t^2 - 190s^2t^9 + 70s^3t^8 + 70s^4t^7 + 70s^5t^6 + 70s^6t^5 + 70s^7t^4 + 70s^8t^3 - 190s^9t^2 + 260rs^8 + 260r^8s - 260rs^9 - 260r^9s + 70rs^{10} + 70r^{10}s + 260rt^8 + 260r^8t - 260rt^9 - 260r^9t + 70rt^{10} + 70r^{10}t + 260st^8 + 260s^8t - 260st^9 - 260s^9t + 70st^{10} + 70s^{10}t - 1222rst^7 - 1222rs^7t - 1222r^7st + 1300rst^8 + 1300rs^8t + 1300r^8st - 505rst^9 - 505rs^9t - 505r^9st + 70rst^{10} + 70rs^{10}t + 70r^{10}st + 2210rs^2t^6 - 1365rs^3t^5 - 1365rs^4t^4 - 1365rs^5t^3 + 2210rs^6t^2 + 2210r^2st^6 + 2210r^2s^6t - 1365r^3st^5 - 1365r^3s^5t - 1365r^4st^4 - 1365r^4s^4t - 1365r^5st^3 - 1365r^5s^3t + 2210r^6st^2 + 2210r^6s^2t - 2340rs^2t^7 + 1092rs^3t^6 + 1092rs^4t^5 + 1092rs^5t^4 + 1092rs^6t^3 - 2340rs^7t^2 - 2340r^2st^7 - 2340r^2s^7t + 1092r^3st^6 + 1092r^3s^6t + 1092r^4st^5 + 1092r^4s^5t + 1092r^5st^4 + 1092r^5s^4t + 1092r^6st^3 + 1092r^6s^3t - 2340r^7st^2 - 2340r^7s^2t + 1055rs^2t^8 - 427rs^3t^7 - 427rs^4t^6 - 427rs^5t^5 - 427rs^6t^4 - 427rs^7t^3 + 1055rs^8t^2 + 1055r^2st^8 + 1055r^2s^8t - 427r^3st^7 - 427r^3s^7t - 427r^4st^6 - 427r^4s^6t - 427r^5st^5- 427r^5s^5t - 427r^6st^4 - 427r^6s^4t - 427r^7st^3 - 427r^7s^3t + 1055r^8st^2 + 1055r^8s^2t - 190rs^2t^9 + 70rs^3t^8 + 70rs^4t^7 + 70rs^5t^6 + 70rs^6t^5 + 70rs^7t^4 + 70rs^8t^3 - 190rs^9t^2 - 190r^2st^9 - 190r^2s^9t + 70r^3st^8 + 70r^3s^8t + 70r^4st^7 + 70r^4s^7t + 70r^5st^6 + 70r^5s^6t + 70r^6st^5 + 70r^6s^5t + 70r^7st^4 + 70r^7s^4t + 70r^8st^3 + 70r^8s^3t - 190r^9st^2 - 190r^9s^2t + 2782r^2s^2t^5 - 9373r^2s^3t^4 - 9373r^2s^4t^3 + 2782r^2s^5t^2 - 9373r^3s^2t^4 + 55692r^3s^3t^3 - 9373r^3s^4t^2 - 9373r^4s^2t^3 - 9373r^4s^3t^2 + 2782r^5s^2t^2 + 884r^2s^2t^6 + 1456r^2s^3t^5 + 1456r^2s^4t^4 + 1456r^2s^5t^3 + 884r^2s^6t^2 + 1456r^3s^2t^5 - 6552r^3s^3t^4 - 6552r^3s^4t^3 + 1456r^3s^5t^2 + 1456r^4s^2t^4 - 6552r^4s^3t^3 + 1456r^4s^4t^2 + 1456r^5s^2t^3 + 1456r^5s^3t^2 + 884r^6s^2t^2 - 2065r^2s^2t^7 + 1029r^2s^3t^6 + 1029r^2s^4t^5 + 1029r^2s^5t^4 + 1029r^2s^6t^3 - 2065r^2s^7t^2 + 1029r^3s^2t^6 - 882r^3s^3t^5 - 882r^3s^4t^4 - 882r^3s^5t^3 + 1029r^3s^6t^2 + 1029r^4s^2t^5 - 882r^4s^3t^4 - 882r^4s^4t^3 + 1029r^4s^5t^2 + 1029r^5s^2t^4 - 882r^5s^3t^3 + 1029r^5s^4t^2 + 1029r^6s^2t^3 + 1029r^6s^3t^2 - 2065r^7s^2t^2 + 590r^2s^2t^8 - 294r^2s^3t^7 - 294r^2s^4t^6 - 294r^2s^5t^5 - 294r^2s^6t^4 - 294r^2s^7t^3 + 590r^2s^8t^2 - 294r^3s^2t^7 + 252r^3s^3t^6 + 252r^3s^4t^5 + 252r^3s^5t^4 + 252r^3s^6t^3 - 294r^3s^7t^2 - 294r^4s^2t^6 + 252r^4s^3t^5 + 252r^4s^4t^4 + 252r^4s^5t^3 - 294r^4s^6t^2 - 294r^5s^2t^5 + 252r^5s^3t^4 + 252r^5s^4t^3 - 294r^5s^5t^2 - 294r^6s^2t^4 + 252r^6s^3t^3 - 294r^6s^4t^2 - 294r^7s^2t^3 - 294r^7s^3t^2 + 590r^8s^2t^2))/(2162160r^2s^2t^2) - ((x - x_n)^8(4r^2s^3 + 4r^3s^2 + 4r^3s^3 + 4r^2t^3 + 4r^3t^2 + 4r^3t^3 + 4s^2t^3 + 4s^3t^2 + 4s^3t^3 + 7rst^3 + 7rs^3t + 7r^3st + 20rs^2t^2 + 20r^2st^2 + 20r^2s^2t + 20rs^2t^3 + 20rs^3t^2 + 20r^2st^3 + 20r^2s^3t + 20r^3st^2 + 20r^3s^2t + 7rs^3t^3 + 7r^3st^3 + 7r^3s^3t + 48r^2s^2t^2 + 20r^2s^2t^3 + 20r^2s^3t^2 + 20r^3s^2t^2 + 4r^2s^3t^3 + 4r^3s^2t^3 + 4r^3s^3t^2))/(1680h^4r^3s^3t^3),\\\\
    \beta_r=((x - x_n)^{12}(8rs - 12r^2t^2 - 12r^2s^2 + 8rt - 4st + 8rs^2 - 19r^2s + 9r^3s + 8rt^2 - 19r^2t + 9r^3t - 4st^2 - 4s^2t - 12r^2 + 9r^3 + 9r^4 + 8rst^2 + 8rs^2t - 19r^2st + 21rst))/(11880h^8r^3(r - s)^3(r - t)^3(r - 1)^3) + ((x - x_n)^8(5r^2s^3 - 7r^3s^2 - 7r^3s^3 + 9r^4s^2 + 5r^2t^3 - 7r^3t^2 - 7r^3t^3 + 9r^4t^2 - 4s^2t^3 - 4s^3t^2 - 4s^3t^3 + 5rst^3 + 5rs^3t - 28r^3st + 36r^4st + 4rs^2t^2 + 13r^2st^2 + 13r^2s^2t + 4rs^2t^3 + 4rs^3t^2 + 13r^2st^3 + 13r^2s^3t - 47r^3st^2 - 47r^3s^2t + 5rs^3t^3 - 28r^3st^3 - 28r^3s^3t + 36r^4st^2 + 36r^4s^2t + 24r^2s^2t^2 + 13r^2s^2t^3 + 13r^2s^3t^2 - 47r^3s^2t^2 + 5r^2s^3t^3 - 7r^3s^2t^3 - 7r^3s^3t^2 + 9r^4s^2t^2))/(1680h^4r^3(r - s)^3(r - t)^3(r - 1)^3) - ((x - x_n)^9(2r^2s^2 + 2r^2s^3 - 10r^3s^2 - 7r^3s^3 + 9r^4s^2 + 2r^2t^2 + 2r^2t^3 - 10r^3t^2 - 7r^3t^3 + 9r^4t^2 - 4s^2t^2 - 4s^2t^3 - 4s^3t^2 - s^3t^3 + 2rs^3 - 7r^3s + 9r^4s + 2rt^3 - 7r^3t + 9r^4t - st^3 - s^3t + 7rst^2 + 7rs^2t - 2r^2st + 7rst^3 + 7rs^3t - 26r^3st + 36r^4st + 12rs^2t^2 + 3r^2st^2 + 3r^2s^2t + 7rs^2t^3 + 7rs^3t^2 - 2r^2st^3 - 2r^2s^3t - 26r^3st^2 - 26r^3s^2t + 2rs^3t^3 - 7r^3st^3 - 7r^3s^3t + 9r^4st^2 + 9r^4s^2t + 3r^2s^2t^2 + 2r^2s^2t^3 + 2r^2s^3t^2 - 10r^3s^2t^2))/(1512h^5r^3(r - s)^3(r - t)^3(r - 1)^3) + (h^2(x - x_n)^2(1690r^3s^8 - 520r^2s^9 - 312r^4s^7 - 312r^5s^6 - 312r^6s^5 - 312r^7s^4 - 3887r^8s^3 + 4550r^9s^2 + 520r^2s^{10} - 780r^3s^9 - 2002r^4s^8 + 572r^5s^7 + 572r^6s^6 + 572r^7s^5 + 572r^8s^4 + 9009r^9s^3 - 10790r^{10}s^2 - 140r^2s^{11} - 385r^3s^{10} + 2020r^4s^9 - 320r^5s^8 - 320r^6s^7 - 320r^7s^6 - 320r^8s^5 - 320r^9s^4 - 6235r^{10}s^3 + 7870r^{11}s^2 + 210r^3s^{11} - 525r^4s^{10} + 60r^5s^9 + 60r^6s^8 + 60r^7s^7 + 60r^8s^6 + 60r^9s^5 + 60r^{10}s^4 + 1425r^{11}s^3 - 1890r^{12}s^2 - 520r^2t^9 + 1690r^3t^8 - 312r^4t^7 - 312r^5t^6 - 312r^6t^5 - 312r^7t^4 - 3887r^8t^3 + 4550r^9t^2 + 520r^2t^{10} - 780r^3t^9 - 2002r^4t^8 + 572r^5t^7 + 572r^6t^6 + 572r^7t^5 + 572r^8t^4 + 9009r^9t^3 - 10790r^{10}t^2 - 140r^2t^{11} - 385r^3t^{10} + 2020r^4t^9 - 320r^5t^8 - 320
    r^6t^7 - 320r^7t^6 - 320r^8t^5 - 320r^9t^4 - 6235r^{10}t^3 + 7870r^{11}t^2 + 210r^3t^{11} - 525r^4t^{10} + 60r^5t^9 + 60r^6t^8 + 60r^7t^7 + 60r^8t^6 + 60r^9t^5 + 60r^{10}t^4 + 1425r^{11}t^3 - 1890r^{12}t^2 + 260s^2t^9 - 884s^3t^8 + 546s^4t^7 + 546s^5t^6 + 546s^6t^5 + 546s^7t^4 - 884s^8t^3 + 260s^9t^2 - 260s^2t^{10} + 780s^3t^9 - 364s^4t^8 - 364s^5t^7 - 364s^6t^6 - 364s^7t^5 - 364s^8t^4 + 780s^9t^3 - 260s^{10}t^2 + 70s^2t^{11} - 190s^3t^{10} + 70s^4t^9 + 70s^5t^8 + 70s^6t^7 + 70s^7t^6 + 70s^8t^5 + 70s^9t^4 - 190s^{10}t^3 + 70s^{11}t^2 - 1365r^{10}s + 3315r^{11}s - 2520r^{12}s + 630r^{13}s - 1365r^{10}t + 3315r^{11}t - 2520r^{12}t + 630r^{13}t - 260rst^9 - 260rs^9t + 9100r^9st + 260rst^{10} + 260rs^{10}t - 21580r^{10}st - 70rst^{11} - 70rs^{11}t + 15740r^{11}st - 3780r^{12}st - 234rs^2t^8 + 3770rs^3t^7 - 4095rs^4t^6 - 4095rs^5t^5 - 4095rs^6t^4 + 3770rs^7t^3 - 234rs^8t^2 + 2340r^2st^8 + 2340r^2s^8t - 6604r^3st^7 - 6604r^3s^7t + 1404r^4st^6 + 1404r^4s^6t + 1404r^5st^5 + 1404r^5s^5t + 1404r^6st^4 + 1404r^6s^4t + 15704r^7st^3 + 15704r^7s^3t - 20475r^8st^2 - 20475r^8s^2t - 260rs^2t^9 - 1300rs^3t^8 + 1274rs^4t^7 + 1274rs^5t^6 + 1274rs^6t^5 + 1274rs^7t^4 - 1300rs^8t^3 - 260rs^9t^2 - 1820r^2st^9 - 1820r^2s^9t + 1976r^3st^8 + 1976r^3s^8t + 7904r^4st^7 + 7904r^4s^7t - 2392r^5st^6 - 2392r^5s^6t - 2392r^6st^5 - 2392r^6s^5t - 2392r^7st^4 - 2392r^7s^4t - 34996r^8st^3 - 34996r^8s^3t + 47125r^9st^2 + 47125r^9s^2t + 445rs^2t^{10} - 855rs^3t^9 + 315rs^4t^8 + 315rs^5t^7 + 315rs^6t^6 + 315rs^7t^5 + 315rs^8t^4 - 855rs^9t^3 + 445rs^{10}t^2 + 250r^2st^{10} + 250r^2s^{10}t + 1695r^3st^9 + 1695r^3s^9t - 6768r^4st^8 - 6768r^4s^8t + 1188r^5st^7 + 1188r^5s^7t + 1188r^6st^6 + 1188r^6s^6t + 1188r^7st^5 + 1188r^7s^5t + 1188r^8st^4 + 1188r^8s^4t + 22326r^9st^3 + 22326r^9s^3t - 32495r^{10}st^2 - 32495r^{10}s^2t - 140rs^2t^{11} + 380rs^3t^{10} - 140rs^4t^9 - 140rs^5t^8 - 140rs^6t^7 - 140rs^7t^6 - 140rs^8t^5 - 140rs^9t^4 + 380rs^{10}t^3 - 140rs^{11}t^2 + 70r^2st^{11} + 70r^2s^{11}t - 700r^3st^{10} - 700r^3s^{10}t + 1555r^4st^9 + 1555r^4s^9t - 200r^5st^8 - 200r^5s^8t - 200r^6st^7 - 200r^6s^7t - 200r^7st^6 - 200r^7s^6t - 200r^8st^5 - 200r^8s^5t - 200r^9st^4 - 200r^9s^4t - 4750r^{10}st^3 - 4750r^{10}s^3t + 7405r^{11}st^2 + 7405r^{11}s^2t - 3068r^2s^2t^7 - 494r^2s^3t^6 + 2366r^2s^4t^5 + 2366r^2s^5t^4 - 494r^2s^6t^3 - 3068r^2s^7t^2 + 5863r^3s^2t^6 + 4147r^3s^3t^5 + 7007r^3s^4t^4 + 4147r^3s^5t^3 + 5863r^3s^6t^2 - 1144r^4s^2t^5 - 2860r^4s^3t^4 - 2860r^4s^4t^3 - 1144r^4s^5t^2 - 1144r^5s^2t^4 - 5720r^5s^3t^3 - 1144r^5s^4t^2 - 16874r^6s^2t^3 - 16874r^6s^3t^2 + 32032r^7s^2t^2 + 3042r^2s^2t^8 - 5434r^2s^3t^7 + 5005r^2s^4t^6 + 5005r^2s^5t^5 + 5005r^2s^6t^4 - 5434r^2s^7t^3 + 3042r^2s^8t^2 + 260r^3s^2t^7 - 1066r^3s^3t^6 - 5642r^3s^4t^5 - 5642r^3s^5t^4 - 1066r^3s^6t^3 + 260r^3s^7t^2 - 7397r^4s^2t^6 - 4433r^4s^3t^5 - 9009r^4s^4t^4 - 4433r^4s^5t^3 - 7397r^4s^6t^2 + 1612r^5s^2t^5 + 4576r^5s^3t^4 + 4576r^5s^4t^3 + 1612r^5s^5t^2 + 1612r^6s^2t^4 + 9152r^6s^3t^3 + 1612r^6s^4t^2 + 36218r^7s^2t^3 + 36218r^7s^3t^2 - 71136r^8s^2t^2 - 1250r^2s^2t^9 + 4678r^2s^3t^8 - 3304r^2s^4t^7 - 3304r^2s^5t^6 - 3304r^2s^6t^5 - 3304r^2s^7t^4 + 4678r^2s^8t^3 - 1250r^2s^9t^2 - 2015r^3s^2t^8 - 663r^3s^3t^7 + 1365r^3s^4t^6 + 1365r^3s^5t^5 + 1365r^3s^6t^4 - 663r^3s^7t^3 - 2015r^3s^8t^2 + 4394r^4s^2t^7 + 2886r^4s^3t^6 + 4914r^4s^4t^5 + 4914r^4s^5t^4 + 2886r^4s^6t^3 + 4394r^4s^7t^2 - 520r^5s^2t^6 - 2028r^5s^3t^5 - 2028r^5s^5t^3 - 520r^5s^6t^2 - 520r^6s^2t^5 - 2028r^6s^3t^4 - 2028r^6s^4t^3 - 520r^6s^5t^2 - 520r^7s^2t^4 - 4056r^7s^3t^3 - 520r^7s^4t^2 - 20423r^8s^2t^3 - 20423r^8s^3t^2 + 45292r^9s^2t^2 + 205r^2s^2t^{10} - 1095r^2s^3t^9 + 595r^2s^4t^8 + 595r^2s^5t^7 + 595r^2s^6t^6 + 595r^2s^7t^5 + 595r^2s^8t^4 - 1095r^2s^9t^3 + 205r^2s^{10}t^2 + 540r^3s^2t^9 + 228r^3s^3t^8 - 84r^3s^4t^7 - 84r^3s^5t^6 - 84r^3s^6t^5 - 84r^3s^7t^4 + 228r^3s^8t^3 + 540r^3s^9t^2 - 767r^4s^2t^8 - 507r^4s^3t^7 - 819r^4s^4t^6 - 819r^4s^5t^5 - 819r^4s^6t^4 - 507r^4s^7t^3 - 767r^4s^8t^2 + 52r^5s^2t^7 + 312r^5s^3t^6 + 312r^5s^6t^3 + 52r^5s^7t^2 + 52r^6s^2t^6 + 312r^6s^3t^5 + 312r^6s^5t^3 + 52r^6s^6t^2 + 52r^7s^2t^5 + 312r^7s^3t^4 + 312r^7s^4t^3 + 52r^7s^5t^2 + 52r^8s^2t^4 + 624r^8s^3t^3 + 52r^8s^4t^2 + 3939r^9s^2t^3 + 3939r^9s^3t^2 - 9620r^{10}s^2t^2))/(2162160r^3(r - s)^3(r - t)^3(r - 1)^3) - ((x - x_n)^{10}(4r^2s^2 + 7r^2s^3 + 19r^3s^2 + 7r^3s^3 - 9r^4s^2 + 4r^2t^2 + 7r^2t^3 + 19r^3t^2 + 7r^3t^3 - 9r^4t^2 + 16s^2t^2 + 4s^2t^3 + 4s^3t^2 - 8rs^2 + 7r^2s - 8rs^3 + 19r^3s - 36r^4s - 8rt^2 + 7r^2t - 8rt^3 + 19r^3t - 36r^4t + 4st^2 + 4s^2t + 4st^3 + 4s^3t + 7r^3 - 9r^4 - 36rst^2 - 36rs^2t + 27r^2st - 13rst^3 - 13rs^3t + 20r^3st - 36r^4st - 36rs^2t^2 + 27r^2st^2 + 27r^2s^2t - 8rs^2t^3 - 8rs^3t^2 + 7r^2st^3 + 7r^2s^3t + 19r^3st^2 + 19r^3s^2t - 13rst + 4r^2s^2t^2))/(5040h^6r^3(r - s)^3(r - t)^3(r - 1)^3) + ((x - x_n)^{11}(10r^2s^2 + 3r^2s^3 + 3r^3s^2 + 10r^2t^2 + 3r^2t^3 + 3r^3t^2 + 4s^2t^2 - 2rs - 2rt + st - 8rs^2 + 10r^2s - 2rs^3 - 2r^3s - 9r^4s - 8rt^2 + 10r^2t - 2rt^3 - 2r^3t - 9r^4t + 4st^2 + 4s^2t + st^3 + s^3t + 3r^2 + 3r^3 - 9r^4 - 15rst^2 - 15rs^2t + 21r^2st - 2rst^3 - 2rs^3t - 2r^3st - 8rs^2t^2 + 10r^2st^2 + 10r^2s^2t - 15rst))/(3960h^7r^3(r - s)^3(r - t)^3(r - 1)^3) - ((x - x_n)^{13}(2rs + 2rt - st - 3r^2s - 3r^2t - 3r^2 + 4r^3 + 2rst))/(8580h^9r^3(r - s)^3(r - t)^3(r - 1)^3) - (h(x - x_n)^3(1690r^2s^8 - 312r^3s^7 - 312r^4s^6 - 312r^5s^5 - 312r^6s^4 - 312r^7s^3 - 3887r^8s^2 - 780r^2s^9 - 2002r^3s^8 + 572r^4s^7 + 572r^5s^6 + 572r^6s^5 + 572r^7s^4 + 572r^8s^3 + 9009r^9s^2 - 385r^2s^{10} + 2020r^3s^9 - 320r^4s^8 - 320r^5s^7 - 320r^6s^6 - 320r^7s^5 - 320r^8s^4 - 320r^9s^3 - 6235r^{10}s^2 + 210r^2s^{11} - 525r^3s^{10} + 60r^4s^9 + 60r^5s^8 + 60r^6s^7 + 60r^7s^6 + 60r^8s^5 + 60r^9s^4 + 60r^{10}s^3 + 1425r^{11}s^2 + 1690r^2t^8 - 312r^3t^7 - 312r^4t^6 - 312r^5t^5 - 312r^6t^4 - 312r^7t^3 - 3887r^8t^2 - 780r^2t^9 - 2002r^3t^8 + 572r^4t^7 + 572r^5t^6 + 572r^6t^5 + 572r^7\\
    $
    $
    t^4 + 572r^8t^3 + 9009r^9t^2 - 385r^2t^{10} + 2020r^3t^9 - 320r^4t^8 - 320r^5t^7 - 320r^6t^6 - 320r^7t^5 - 320r^8t^4 - 320r^9t^3 - 6235r^{10}t^2 + 210r^2t^{11} - 525r^3t^{10} + 60r^4t^9 + 60r^5t^8 + 60r^6t^7 + 60r^7t^6 + 60r^8t^5 + 60r^9t^4 + 60r^{10}t^3 + 1425r^{11}t^2 - 884s^2t^8 + 546s^3t^7 + 546s^4t^6 + 546s^5t^5 + 546s^6t^4 + 546s^7t^3 - 884s^8t^2 + 780s^2t^9 - 364s^3t^8 - 364s^4t^7 - 364s^5t^6 - 364s^6t^5 - 364s^7t^4 - 364s^8t^3 + 780s^9t^2 - 190s^2t^{10} + 70s^3t^9 + 70s^4t^8 + 70s^5t^7 + 70s^6t^6 + 70s^7t^5 + 70s^8t^4 + 70s^9t^3 - 190s^{10}t^2 - 520rs^9 + 4550r^9s + 520rs^{10} - 10790r^{10}s - 140rs^{11} + 7870r^{11}s - 1890r^{12}s - 520rt^9 + 4550r^9t + 520rt^{10} - 10790r^{10}t - 140rt^{11} + 7870r^{11}t - 1890r^{12}t + 260st^9 + 260s^9t - 260st^{10} - 260s^{10}t + 70st^{11} + 70s^{11}t - 1365r^{10} + 3315r^{11} - 2520r^{12} + 630r^{13} + 650rst^8 + 650rs^8t - 16588r^8st - 1040rst^9 - 1040rs^9t + 38116r^9st + 635rst^{10} + 635rs^{10}t - 26260r^{10}st - 140rst^{11} - 140rs^{11}t + 5980r^{11}st + 3224rs^2t^7 - 4641rs^3t^6 - 4641rs^4t^5 - 4641rs^5t^4 - 4641rs^6t^3 + 3224rs^7t^2 - 6292r^2st^7 - 6292r^2s^7t + 1716r^3st^6 + 1716r^3s^6t + 1716r^4st^5 + 1716r^4s^5t + 1716r^5st^4 + 1716r^5s^4t + 1716r^6st^3 + 1716r^6s^3t + 16016r^7st^2 + 16016r^7s^2t - 936rs^2t^8 + 1638rs^3t^7 + 1638rs^4t^6 + 1638rs^5t^5 + 1638rs^6t^4 + 1638rs^7t^3 - 936rs^8t^2 + 3978r^2st^8 + 3978r^2s^8t + 7332r^3st^7 + 7332r^3s^7t - 2964r^4st^6 - 2964r^4s^6t - 2964r^5st^5 - 2964r^5s^5t - 2964r^6st^4 - 2964r^6s^4t - 2964r^7st^3 - 2964r^7s^3t - 35568r^8st^2 - 35568r^8s^2t - 925rs^2t^9 + 245rs^3t^8 + 245rs^4t^7 + 245rs^5t^6 + 245rs^6t^5 + 245rs^7t^4 + 245rs^8t^3 - 925rs^9t^2 - 325r^2st^9 - 325r^2s^9t - 6448r^3st^8 - 6448r^3s^8t + 1508r^4st^7 + 1508r^4s^7t + 1508r^5st^6 + 1508r^5s^6t + 1508r^6st^5 + 1508r^6s^5t + 1508r^7st^4 + 1508r^7s^4t + 1508r^8st^3 + 1508r^8s^3t + 22646r^9st^2 + 22646r^9s^2t + 380rs^2t^{10} - 140rs^3t^9 - 140rs^4t^8 - 140rs^5t^7 - 140rs^6t^6 - 140rs^7t^5 - 140rs^8t^4 - 140rs^9t^3 + 380rs^{10}t^2 - 175r^2st^{10} - 175r^2s^{10}t + 1495r^3st^9 + 1495r^3s^9t - 260r^4st^8 - 260r^4s^8t - 260r^5st^7 - 260r^5s^7t - 260r^6st^6 - 260r^6s^6t - 260r^7st^5 - 260r^7s^5t - 260r^8st^4 - 260r^8s^4t - 260r^9st^3 - 260r^9s^3t - 4810r^{10}st^2 - 4810r^{10}s^2t + 4147r^2s^2t^6 + 7007r^2s^3t^5 + 7007r^2s^4t^4 + 7007r^2s^5t^3 + 4147r^2s^6t^2 - 2860r^3s^2t^5 - 2860r^3s^5t^2 - 2860r^4s^2t^4 - 2860r^4s^4t^2 - 2860r^5s^2t^3 - 2860r^5s^3t^2 - 18590r^6s^2t^2 - 7072r^2s^2t^7 + 3367r^2s^3t^6 + 3367r^2s^4t^5 + 3367r^2s^5t^4 + 3367r^2s^6t^3 - 7072r^2s^7t^2 - 4433r^3s^2t^6 - 9009r^3s^3t^5 - 9009r^3s^4t^4 - 9009r^3s^5t^3 - 4433r^3s^6t^2 + 4576r^4s^2t^5 + 4576r^4s^5t^2 + 4576r^5s^2t^4 + 4576r^5s^4t^2 + 4576r^6s^2t^3 + 4576r^6s^3t^2 + 39182r^7s^2t^2 + 4433r^2s^2t^8 - 3549r^2s^3t^7 - 3549r^2s^4t^6 - 3549r^2s^5t^5 - 3549r^2s^6t^4 - 3549r^2s^7t^3 + 4433r^2s^8t^2 + 2886r^3s^2t^7 + 4914r^3s^3t^6 + 4914r^3s^4t^5 + 4914r^3s^5t^4 + 4914r^3s^6t^3 + 2886r^3s^7t^2 - 2028r^4s^2t^6 - 2028r^4s^6t^2 - 2028r^5s^2t^5 - 2028r^5s^5t^2 - 2028r^6s^2t^4 - 2028r^6s^4t^2 - 2028r^7s^2t^3 - 2028r^7s^3t^2 - 21931r^8s^2t^2 - 955r^2s^2t^9 + 735r^2s^3t^8 + 735r^2s^4t^7 + 735r^2s^5t^6 + 735r^2s^6t^5 + 735r^2s^7t^4 + 735r^2s^8t^3 - 955r^2s^9t^2 - 507r^3s^2t^8 - 819r^3s^3t^7 - 819r^3s^4t^6 - 819r^3s^5t^5 - 819r^3s^6t^4 - 819r^3s^7t^3 - 507r^3s^8t^2 + 312r^4s^2t^7 + 312r^4s^7t^2 + 312r^5s^2t^6 + 312r^5s^6t^2 + 312r^6s^2t^5 + 312r^6s^5t^2 + 312r^7s^2t^4 + 312r^7s^4t^2 + 312r^8s^2t^3 + 312r^8s^3t^2 + 4199r^9s^2t^2))/(2162160r^3(r - s)^3(r - t)^3(r - 1)^3) - (h^3st(x - x_n)(1690r^2s^7 - 312r^3s^6 - 312r^4s^5 - 312r^5s^4 - 312r^6s^3 - 3887r^7s^2 - 780r^2s^8 - 2002r^3s^7 + 572r^4s^6 + 572r^5s^5 + 572r^6s^4 + 572r^7s^3 + 9009r^8s^2 - 385r^2s^9 + 2020r^3s^8 - 320r^4s^7 - 320r^5s^6 - 320r^6s^5 - 320r^7s^4 - 320r^8s^3 - 6235r^9s^2 + 210r^2s^{10} - 525r^3s^9 + 60r^4s^8 + 60r^5s^7 + 60r^6s^6 + 60r^7s^5 + 60r^8s^4 + 60r^9s^3 + 1425r^{10}s^2 + 1690r^2t^7 - 312r^3t^6 - 312r^4t^5 - 312r^5t^4 - 312r^6t^3 - 3887r^7t^2 - 780r^2t^8 - 2002r^3t^7 + 572r^4t^6 + 572r^5t^5 + 572r^6t^4 + 572r^7t^3 + 9009r^8t^2 - 385r^2t^9 + 2020r^3t^8 - 320r^4t^7 - 320r^5t^6 - 320r^6t^5 - 320r^7t^4 - 320r^8t^3 - 6235r^9t^2 + 210r^2t^{10} - 525r^3t^9 + 60r^4t^8 + 60r^5t^7 + 60r^6t^6 + 60r^7t^5 + 60r^8t^4 + 60r^9t^3 + 1425r^{10}t^2 - 884s^2t^7 + 546s^3t^6 + 546s^4t^5 + 546s^5t^4 + 546s^6t^3 - 884s^7t^2 + 780s^2t^8 - 364s^3t^7 - 364s^4t^6 - 364s^5t^5 - 364s^6t^4 - 364s^7t^3 + 780s^8t^2 - 190s^2t^9 + 70s^3t^8 + 70s^4t^7 + 70s^5t^6 + 70s^6t^5 + 70s^7t^4 + 70s^8t^3 - 190s^9t^2 - 520rs^8 + 4550r^8s + 520rs^9 - 10790r^9s - 140rs^{10} + 7870r^{10}s - 1890r^{11}s - 520rt^8 + 4550r^8t + 520rt^9 - 10790r^9t - 140rt^{10} + 7870r^{10}t - 1890r^{11}t + 260st^8 + 260s^8t - 260st^9 - 260s^9t + 70st^{10} + 70s^{10}t - 1365r^9 + 3315r^{10} - 2520r^{11} + 630r^{12} + 650rst^7 + 650rs^7t - 16588r^7st - 1040rst^8 - 1040rs^8t + 38116r^8st + 635rst^9 + 635rs^9t - 26260r^9st - 140rst^{10} - 140rs^{10}t + 5980r^{10}st + 3224rs^2t^6 - 4641rs^3t^5 - 4641rs^4t^4 - 4641rs^5t^3 + 3224rs^6t^2 - 6292r^2st^6 - 6292r^2s^6t + 1716r^3st^5 + 1716r^3s^5t + 1716r^4st^4 + 1716r^4s^4t + 1716r^5st^3 + 1716r^5s^3t + 16016r^6st^2 + 16016r^6s^2t - 936rs^2t^7 + 1638rs^3t^6 + 1638rs^4t^5 + 1638rs^5t^4 + 1638rs^6t^3 - 936rs^7t^2 + 3978r^2st^7 + 3978r^2s^7t + 7332r^3st^6 + 7332r^3s^6t - 2964r^4st^5 - 2964r^4s^5t - 2964r^5st^4 - 2964r^5s^4t - 2964r^6st^3 - 2964r^6s^3t - 35568r^7st^2 - 35568r^7s^2t - 925rs^2t^8 + 245rs^3t^7 + 245rs^4t^6 + 245rs^5t^5 + 245rs^6t^4 + 245rs^7t^3 - 925rs^8t^2 - 325r^2st^8 - 325r^2s^8t - 6448r^3st^7 - 6448r^3s^7t + 1508r^4st^6 + 1508r^4s^6t + 1508r^5st^5 + 1508r^5s^5t + 1508r^6st^4 + 1508r^6s^4t + 1508r^7st^3 + 1508r^7s^3t + 22646r^8st^2 + 22646r^8s^2t + 380rs^2t^9 - 140rs^3t^8
    - 140rs^4t^7 - 140rs^5t^6 - 140rs^6t^5 - 140rs^7t^4 - 140rs^8t^3 + 380rs^9t^2 - 175r^2st^9 - 175r^2s^9t + 1495r^3st^8 + 1495r^3s^8t - 260r^4st^7 - 260r^4s^7t - 260r^5st^6 - 260r^5s^6t - 260r^6st^5 - 260r^6s^5t - 260r^7st^4 - 260r^7s^4t - 260r^8st^3 - 260r^8s^3t - 4810r^9st^2 - 4810r^9s^2t + 4147r^2s^2t^5 + 7007r^2s^3t^4 + 7007r^2s^4t^3 + 4147r^2s^5t^2 - 2860r^3s^2t^4 - 2860r^3s^4t^2 - 2860r^4s^2t^3 - 2860r^4s^3t^2 - 18590r^5s^2t^2 - 7072r^2s^2t^6 + 3367r^2s^3t^5 + 3367r^2s^4t^4 + 3367r^2s^5t^3 - 7072r^2s^6t^2 - 4433r^3s^2t^5 - 9009r^3s^3t^4 - 9009r^3s^4t^3 - 4433r^3s^5t^2 + 4576r^4s^2t^4 + 4576r^4s^4t^2 + 4576r^5s^2t^3 + 4576r^5s^3t^2 + 39182r^6s^2t^2 + 4433r^2s^2t^7 - 3549r^2s^3t^6 - 3549r^2s^4t^5 - 3549r^2s^5t^4 - 3549r^2s^6t^3 + 4433r^2s^7t^2 + 2886r^3s^2t^6 + 4914r^3s^3t^5 + 4914r^3s^4t^4 + 4914r^3s^5t^3 + 2886r^3s^6t^2 - 2028r^4s^2t^5 - 2028r^4s^5t^2 - 2028r^5s^2t^4 - 2028r^5s^4t^2 - 2028r^6s^2t^3 - 2028r^6s^3t^2 - 21931r^7s^2t^2 - 955r^2s^2t^8 + 735r^2s^3t^7 + 735r^2s^4t^6 + 735r^2s^5t^5 + 735r^2s^6t^4 + 735r^2s^7t^3 - 955r^2s^8t^2 - 507r^3s^2t^7 - 819r^3s^3t^6 - 819r^3s^4t^5 - 819r^3s^5t^4 - 819r^3s^6t^3 - 507r^3s^7t^2 + 312r^4s^2t^6 + 312r^4s^6t^2 + 312r^5s^2t^5 + 312r^5s^5t^2 + 312r^6s^2t^4 + 312r^6s^4t^2 + 312r^7s^2t^3 + 312r^7s^3t^2 + 4199r^8s^2t^2))/(2162160r^2(r - s)^3(r - t)^3(r - 1)^3) + (s^2t^2(x - x_n)^6(5rs + 5rt - 3st - 7r^2s - 7r^2t - 7r^2 + 9r^3 + 5rst))/(360h^2r^2(r - s)^3(r - t)^3(r - 1)^3) + (st(x - x_n)^7(7r^3s^2 - 5r^2s^2 - 5r^2t^2 + 7r^3t^2 + s^2t^2 + 7r^3s - 9r^4s + 7r^3t - 9r^4t + rst^2 + rs^2t - 7r^2st + 17r^3st - 9r^4st + rs^2t^2 - 7r^2st^2 - 7r^2s^2t + 7r^3st^2 + 7r^3s^2t - 5r^2s^2t^2))/(420h^3r^3(r - s)^3(r - t)^3(r - 1)^3),\\\\
    \beta_s =((x - x_n)^9(2r^2s^2 - 10r^2s^3 + 2r^3s^2 + 9r^2s^4 - 7r^3s^3 - 4r^2t^2 - 4r^2t^3 - 4r^3t^2 - r^3t^3 + 2s^2t^2 + 2s^2t^3 - 10s^3t^2 - 7s^3t^3 + 9s^4t^2 - 7rs^3 + 2r^3s + 9rs^4 - rt^3 - r^3t + 2st^3 - 7s^3t + 9s^4t + 7rst^2 - 2rs^2t + 7r^2st + 7rst^3 - 26rs^3t + 7r^3st + 36rs^4t + 3rs^2t^2 + 12r^2st^2 + 3r^2s^2t - 2rs^2t^3 - 26rs^3t^2 + 7r^2st^3 - 26r^2s^3t + 7r^3st^2 - 2r^3s^2t - 7rs^3t^3 + 9rs^4t^2 + 9r^2s^4t + 2r^3st^3 - 7r^3s^3t + 3r^2s^2t^2 + 2r^2s^2t^3 - 10r^2s^3t^2 + 2r^3s^2t^2))/(1512h^5s^3(r - s)^3(s - t)^3(s - 1)^3) - ((x - x_n)^8(5r^3s^2 - 7r^2s^3 + 9r^2s^4 - 7r^3s^3 - 4r^2t^3 - 4r^3t^2 - 4r^3t^3 + 5s^2t^3 - 7s^3t^2 - 7s^3t^3 + 9s^4t^2 + 5rst^3 - 28rs^3t + 5r^3st + 36rs^4t + 13rs^2t^2 + 4r^2st^2 + 13r^2s^2t + 13rs^2t^3 - 47rs^3t^2 + 4r^2st^3 - 47r^2s^3t + 4r^3st^2 + 13r^3s^2t - 28rs^3t^3 + 36rs^4t^2 + 36r^2s^4t + 5r^3st^3 - 28r^3s^3t + 24r^2s^2t^2 + 13r^2s^2t^3 - 47r^2s^3t^2 + 13r^3s^2t^2 - 7r^2s^3t^3 + 9r^2s^4t^2 + 5r^3s^2t^3 - 7r^3s^3t^2))/(1680h^4s^3(r - s)^3(s - t)^3(s - 1)^3) - ((x - x_n)^{12}(8rs - 12s^2t^2 - 12r^2s^2 - 4rt + 8st - 19rs^2 + 8r^2s + 9rs^3 - 4rt^2 - 4r^2t + 8st^2 - 19s^2t + 9s^3t - 12s^2 + 9s^3 + 9s^4 + 8rst^2 - 19rs^2t + 8r^2st + 21rst))/(11880h^8s^3(r - s)^3(s - t)^3(s - 1)^3) - (h^2(x - x_n)^2(4550r^2s^9 - 3887r^3s^8 - 312r^4s^7 - 312r^5s^6 - 312r^6s^5 - 312r^7s^4 + 1690r^8s^3 - 520r^9s^2 - 10790r^2s^{10} + 9009r^3s^9 + 572r^4s^8 + 572r^5s^7 + 572r^6s^6 + 572r^7s^5 - 2002r^8s^4 - 780r^9s^3 + 520r^{10}s^2 + 7870r^2s^{11} - 6235r^3s^{10} - 320r^4s^9 - 320r^5s^8 - 320r^6s^7 - 320r^7s^6 - 320r^8s^5 + 2020r^9s^4 - 385r^{10}s^3 - 140r^{11}s^2 - 1890r^2s^{12} + 1425r^3s^{11} + 60r^4s^{10} + 60r^5s^9 + 60r^6s^8 + 60r^7s^7 + 60r^8s^6 + 60r^9s^5 - 525r^{10}s^4 + 210r^{11}s^3 + 260r^2t^9 - 884r^3t^8 + 546r^4t^7 + 546r^5t^6 + 546r^6t^5 + 546r^7t^4 - 884r^8t^3 + 260r^9t^2 - 260r^2t^{10} + 780r^3t^9 - 364r^4t^8 - 364r^5t^7 - 364r^6t^6 - 364r^7t^5 - 364r^8t^4 + 780r^9t^3 - 260r^{10}t^2 + 70r^2t^{11} - 190r^3t^{10} + 70r^4t^9 + 70r^5t^8 + 70r^6t^7 + 70r^7t^6 + 70r^8t^5 + 70r^9t^4 - 190r^{10}t^3 + 70r^{11}t^2 - 520s^2t^9 + 1690s^3t^8 - 312s^4t^7 - 312s^5t^6 - 312s^6t^5 - 312s^7t^4 - 3887s^8t^3 + 4550s^9t^2 + 520s^2t^{10} - 780s^3t^9 - 2002s^4t^8 + 572s^5t^7 + 572s^6t^6 + 572s^7t^5 + 572s^8t^4 + 9009s^9t^3 - 10790s^{10}t^2 - 140s^2t^{11} - 385s^3t^{10} + 2020s^4t^9 - 320s^5t^8 - 320s^6t^7 - 320s^7t^6 - 320s^8t^5 - 320s^9t^4 - 6235s^{10}t^3 + 7870s^{11}t^2 + 210s^3t^{11} - 525s^4t^{10} + 60s^5t^9 + 60s^6t^8 + 60s^7t^7 + 60s^8t^6 + 60s^9t^5 + 60s^{10}t^4 + 1425s^{11}t^3 - 1890s^{12}t^2 - 1365rs^{10} + 3315rs^{11} - 2520rs^{12} + 630rs^{13} - 1365s^{10}t + 3315s^{11}t - 2520s^{12}t + 630s^{13}t - 260rst^9 + 9100rs^9t - 260r^9st + 260rst^{10} - 21580rs^{10}t + 260r^{10}st - 70rst^{11} + 15740rs^{11}t - 70r^{11}st - 3780rs^{12}t + 2340rs^2t^8 - 6604rs^3t^7 + 1404rs^4t^6 + 1404rs^5t^5 + 1404rs^6t^4 + 15704rs^7t^3 - 20475rs^8t^2 - 234r^2st^8 - 20475r^2s^8t + 3770r^3st^7 + 15704r^3s^7t - 4095r^4st^6 + 1404r^4s^6t - 4095r^5st^5 + 1404r^5s^5t - 4095r^6st^4 + 1404r^6s^4t + 3770r^7st^3 - 6604r^7s^3t - 234r^8st^2 + 2340r^8s^2t - 1820rs^2t^9 + 1976rs^3t^8 + 7904rs^4t^7 - 2392rs^5t^6 - 2392rs^6t^5 - 2392rs^7t^4 - 34996rs^8t^3 + 47125rs^9t^2 - 260r^2st^9 + 47125r^2s^9t - 1300r^3st^8 - 34996r^3s^8t + 1274r^4st^7 - 2392r^4s^7t + 1274r^5st^6 - 2392r^5s^6t + 1274r^6st^5 - 2392r^6s^5t + 1274r^7st^4 + 7904r^7s^4t - 1300r^8st^3 + 1976r^8s^3t - 260r^9st^2 - 1820r^9s^2t + 250rs^2t^{10} + 1695rs^3t^9 - 6768rs^4t^8 + 1188rs^5t^7 + 1188rs^6t^6 + 1188rs^7t^5 + 1188rs^8t^4 + 22326rs^9t^3 - 32495rs^{10}t^2 + 445r^2st^{10} - 32495r^2s^{10}t - 855r^3st^9 + 22326r^3s^9t + 315r^4st^8 + 1188r^4s^8t + 315r^5st^7 + 1188r^5s^7t + 315r^6st^6 + 1188r^6s^6t + 315r^7st^5 + 1188r^7s^5t + 315r^8st^4 - 6768r^8s^4t - 855r^9st^3 + 1695r^9s^3t + 445r^{10}st^2 + 250r^{10}s^2t + 70rs^2t^{11} - 700rs^3t^{10} + 1555rs^4t^9 - 200rs^5t^8 - 200rs^6t^7 - 200rs^7t^6 - 200rs^8t^5 - 200rs^9t^4 - 4750rs^{10}t^3 + 7405rs^{11}t^2 - 140r^2st^{11} + 7405r^2s^{11}t + 380r^3
    st^{10} - 4750r^3s^{10}t - 140r^4st^9 - 200r^4s^9t - 140r^5st^8 - 200r^5s^8t - 140r^6st^7 - 200r^6s^7t - 140r^7st^6 - 200r^7s^6t - 140r^8st^5 - 200r^8s^5t - 140r^9st^4 + 1555r^9s^4t + 380r^{10}st^3 - 700r^{10}s^3t - 140r^{11}st^2 + 70r^{11}s^2t - 3068r^2s^2t^7 + 5863r^2s^3t^6 - 1144r^2s^4t^5 - 1144r^2s^5t^4 - 16874r^2s^6t^3 + 32032r^2s^7t^2 - 494r^3s^2t^6 + 4147r^3s^3t^5 - 2860r^3s^4t^4 - 5720r^3s^5t^3 - 16874r^3s^6t^2 + 2366r^4s^2t^5 + 7007r^4s^3t^4 - 2860r^4s^4t^3 - 1144r^4s^5t^2 + 2366r^5s^2t^4 + 4147r^5s^3t^3 - 1144r^5s^4t^2 - 494r^6s^2t^3 + 5863r^6s^3t^2 - 3068r^7s^2t^2 + 3042r^2s^2t^8 + 260r^2s^3t^7 - 7397r^2s^4t^6 + 1612r^2s^5t^5 + 1612r^2s^6t^4 + 36218r^2s^7t^3 - 71136r^2s^8t^2 - 5434r^3s^2t^7 - 1066r^3s^3t^6 - 4433r^3s^4t^5 + 4576r^3s^5t^4 + 9152r^3s^6t^3 + 36218r^3s^7t^2 + 5005r^4s^2t^6 - 5642r^4s^3t^5 - 9009r^4s^4t^4 + 4576r^4s^5t^3 + 1612r^4s^6t^2 + 5005r^5s^2t^5 - 5642r^5s^3t^4 - 4433r^5s^4t^3 + 1612r^5s^5t^2 + 5005r^6s^2t^4 - 1066r^6s^3t^3 - 7397r^6s^4t^2 - 5434r^7s^2t^3 + 260r^7s^3t^2 + 3042r^8s^2t^2 - 1250r^2s^2t^9 - 2015r^2s^3t^8 + 4394r^2s^4t^7 - 520r^2s^5t^6 - 520r^2s^6t^5 - 520r^2s^7t^4 - 20423r^2s^8t^3 + 45292r^2s^9t^2 + 4678r^3s^2t^8 - 663r^3s^3t^7 + 2886r^3s^4t^6 - 2028r^3s^5t^5 - 2028r^3s^6t^4 - 4056r^3s^7t^3 - 20423r^3s^8t^2 - 3304r^4s^2t^7 + 1365r^4s^3t^6 + 4914r^4s^4t^5 - 2028r^4s^6t^3 - 520r^4s^7t^2 - 3304r^5s^2t^6 + 1365r^5s^3t^5 + 4914r^5s^4t^4 - 2028r^5s^5t^3 - 520r^5s^6t^2 - 3304r^6s^2t^5 + 1365r^6s^3t^4 + 2886r^6s^4t^3 - 520r^6s^5t^2 - 3304r^7s^2t^4 - 663r^7s^3t^3 + 4394r^7s^4t^2 + 4678r^8s^2t^3 - 2015r^8s^3t^2 - 1250r^9s^2t^2 + 205r^2s^2t^{10} + 540r^2s^3t^9 - 767r^2s^4t^8 + 52r^2s^5t^7 + 52r^2s^6t^6 + 52r^2s^7t^5 + 52r^2s^8t^4 + 3939r^2s^9t^3 - 9620r^2s^{10}t^2 - 1095r^3s^2t^9 + 228r^3s^3t^8 - 507r^3s^4t^7 + 312r^3s^5t^6 + 312r^3s^6t^5 + 312r^3s^7t^4 + 624r^3s^8t^3 + 3939r^3s^9t^2 + 595r^4s^2t^8 - 84r^4s^3t^7 - 819r^4s^4t^6 + 312r^4s^7t^3 + 52r^4s^8t^2 + 595r^5s^2t^7 - 84r^5s^3t^6 - 819r^5s^4t^5 + 312r^5s^6t^3 + 52r^5s^7t^2 + 595r^6s^2t^6 - 84r^6s^3t^5 - 819r^6s^4t^4 + 312r^6s^5t^3 + 52r^6s^6t^2 + 595r^7s^2t^5 - 84r^7s^3t^4 - 507r^7s^4t^3 + 52r^7s^5t^2 + 595r^8s^2t^4 + 228r^8s^3t^3 - 767r^8s^4t^2 - 1095r^9s^2t^3 + 540r^9s^3t^2 + 205r^{10}s^2t^2))/(2162160s^3(r - s)^3(s - t)^3(s - 1)^3) + ((x - x_n)^{10}(4r^2s^2 + 19r^2s^3 + 7r^3s^2 - 9r^2s^4 + 7r^3s^3 + 16r^2t^2 + 4r^2t^3 + 4r^3t^2 + 4s^2t^2 + 7s^2t^3 + 19s^3t^2 + 7s^3t^3 - 9s^4t^2 + 7rs^2 - 8r^2s + 19rs^3 - 8r^3s - 36rs^4 + 4rt^2 + 4r^2t + 4rt^3 + 4r^3t - 8st^2 + 7s^2t - 8st^3 + 19s^3t - 36s^4t + 7s^3 - 9s^4 - 36rst^2 + 27rs^2t - 36r^2st - 13rst^3 + 20rs^3t - 13r^3st - 36rs^4t + 27rs^2t^2 - 36r^2st^2 + 27r^2s^2t + 7rs^2t^3 + 19rs^3t^2 - 8r^2st^3 + 19r^2s^3t - 8r^3st^2 + 7r^3s^2t - 13rst + 4r^2s^2t^2))/(5040h^6s^3(r - s)^3(s - t)^3(s - 1)^3) - ((x - x_n)^{11}(10r^2s^2 + 3r^2s^3 + 3r^3s^2 + 4r^2t^2 + 10s^2t^2 + 3s^2t^3 + 3s^3t^2 - 2rs + rt - 2st + 10rs^2 - 8r^2s - 2rs^3 - 2r^3s - 9rs^4 + 4rt^2 + 4r^2t + rt^3 + r^3t - 8st^2 + 10s^2t - 2st^3 - 2s^3t - 9s^4t + 3s^2 + 3s^3 - 9s^4 - 15rst^2 + 21rs^2t - 15r^2st - 2rst^3 - 2rs^3t - 2r^3st + 10rs^2t^2 - 8r^2st^2 + 10r^2s^2t - 15rst))/(3960h^7s^3(r - s)^3(s - t)^3(s - 1)^3) + ((x - x_n)^{13}(2rs - rt + 2st - 3rs^2 - 3s^2t - 3s^2 + 4s^3 + 2rst))/(8580h^9s^3(r - s)^3(s - t)^3(s - 1)^3) + (h(x- x_n)^3(1690r^8s^2 - 312r^3s^7 - 312r^4s^6 - 312r^5s^5 - 312r^6s^4 - 312r^7s^3 - 3887r^2s^8 + 9009r^2s^9 + 572r^3s^8 + 572r^4s^7 + 572r^5s^6 + 572r^6s^5 + 572r^7s^4 - 2002r^8s^3 - 780r^9s^2 - 6235r^2s^{10} - 320r^3s^9 - 320r^4s^8 - 320r^5s^7 - 320r^6s^6 - 320r^7s^5 - 320r^8s^4 + 2020r^9s^3 - 385r^{10}s^2 + 1425r^2s^{11} + 60r^3s^{10} + 60r^4s^9 + 60r^5s^8 + 60r^6s^7 + 60r^7s^6 + 60r^8s^5 + 60r^9s^4 - 525r^{10}s^3 + 210r^{11}s^2 - 884r^2t^8 + 546r^3t^7 + 546r^4t^6 + 546r^5t^5 + 546r^6t^4 + 546r^7t^3 - 884r^8t^2 + 780r^2t^9 - 364r^3t^8 - 364r^4t^7 - 364r^5t^6 - 364r^6t^5 - 364r^7t^4 - 364r^8t^3 + 780r^9t^2 - 190r^2t^{10} + 70r^3t^9 + 70r^4t^8 + 70r^5t^7 + 70r^6t^6 + 70r^7t^5 + 70r^8t^4 + 70r^9t^3 - 190r^{10}t^2 + 1690s^2t^8 - 312s^3t^7 - 312s^4t^6 - 312s^5t^5 - 312s^6t^4 - 312s^7t^3 - 3887s^8t^2 - 780s^2t^9 - 2002s^3t^8 + 572s^4t^7 + 572s^5t^6 + 572s^6t^5 + 572s^7t^4 + 572s^8t^3 + 9009s^9t^2 - 385s^2t^{10} + 2020s^3t^9 - 320s^4t^8 - 320s^5t^7 - 320s^6t^6 - 320s^7t^5 - 320s^8t^4 - 320s^9t^3 - 6235s^{10}t^2 + 210s^2t^{11} - 525s^3t^{10} + 60s^4t^9 + 60s^5t^8 + 60s^6t^7 + 60s^7t^6 + 60s^8t^5 + 60s^9t^4 + 60s^{10}t^3 + 1425s^{11}t^2 + 4550rs^9 - 520r^9s - 10790rs^{10} + 520r^{10}s + 7870rs^{11} - 140r^{11}s - 1890rs^{12} + 260rt^9 + 260r^9t - 260rt^{10} - 260r^{10}t + 70rt^{11} + 70r^{11}t - 520st^9 + 4550s^9t + 520st^{10} - 10790s^{10}t - 140st^{11} + 7870s^{11}t - 1890s^{12}t - 1365s^{10} + 3315s^{11} - 2520s^{12} + 630s^{13} + 650rst^8 - 16588rs^8t + 650r^8st - 1040rst^9 + 38116rs^9t - 1040r^9st + 635rst^{10} - 26260rs^{10}t + 635r^{10}st - 140rst^{11} + 5980rs^{11}t - 140r^{11}st - 6292rs^2t^7 + 1716rs^3t^6 + 1716rs^4t^5 + 1716rs^5t^4 + 1716rs^6t^3 + 16016rs^7t^2 + 3224r^2st^7 + 16016r^2s^7t - 4641r^3st^6 + 1716r^3s^6t - 4641r^4st^5 + 1716r^4s^5t - 4641r^5st^4 + 1716r^5s^4t - 4641r^6st^3 + 1716r^6s^3t + 3224r^7st^2 - 6292r^7s^2t + 3978rs^2t^8 + 7332rs^3t^7 - 2964rs^4t^6 - 2964rs^5t^5 - 2964rs^6t^4 - 2964rs^7t^3 - 35568rs^8t^2 - 936r^2st^8 - 35568r^2s^8t + 1638r^3st^7 - 2964r^3s^7t + 1638r^4st^6 - 2964r^4s^6t + 1638r^5st^5 - 2964r^5s^5t + 1638r^6st^4 - 2964r^6s^4t + 1638r^7st^3 + 7332r^7s^3t - 936r^8st^2 + 3978r^8s^2t - 325rs^2t^9 - 6448rs^3t^8 + 1508rs^4t^7 + 1508rs^5t^6 + 1508rs^6t^5 + 1508rs^7t^4 + 1508rs^8t^3 + 22646rs^9t^2 - 925r^2st^9 +
    22646r^2s^9t + 245r^3st^8 + 1508r^3s^8t + 245r^4st^7 + 1508r^4s^7t + 245r^5st^6 + 1508r^5s^6t + 245r^6st^5 + 1508r^6s^5t + 245r^7st^4 + 1508r^7s^4t + 245r^8st^3 - 6448r^8s^3t - 925r^9st^2 - 325r^9s^2t - 175rs^2t^{10} + 1495rs^3t^9 - 260rs^4t^8 - 260rs^5t^7 - 260rs^6t^6 - 260rs^7t^5 - 260rs^8t^4 - 260rs^9t^3 - 4810rs^{10}t^2 + 380r^2st^{10} - 4810r^2s^{10}t - 140r^3st^9 - 260r^3s^9t - 140r^4st^8 - 260r^4s^8t - 140r^5st^7 - 260r^5s^7t - 140r^6st^6 - 260r^6s^6t - 140r^7st^5 - 260r^7s^5t - 140r^8st^4 - 260r^8s^4t - 140r^9st^3 + 1495r^9s^3t + 380r^{10}st^2 - 175r^{10}s^2t + 4147r^2s^2t^6 - 2860r^2s^3t^5 - 2860r^2s^4t^4 - 2860r^2s^5t^3 - 18590r^2s^6t^2 + 7007r^3s^2t^5 - 2860r^3s^5t^2 + 7007r^4s^2t^4 - 2860r^4s^4t^2 + 7007r^5s^2t^3 - 2860r^5s^3t^2 + 4147r^6s^2t^2 - 7072r^2s^2t^7 - 4433r^2s^3t^6 + 4576r^2s^4t^5 + 4576r^2s^5t^4 + 4576r^2s^6t^3 + 39182r^2s^7t^2 + 3367r^3s^2t^6 - 9009r^3s^3t^5 + 4576r^3s^6t^2 + 3367r^4s^2t^5 - 9009r^4s^3t^4 + 4576r^4s^5t^2 + 3367r^5s^2t^4 - 9009r^5s^3t^3 + 4576r^5s^4t^2 + 3367r^6s^2t^3 - 4433r^6s^3t^2 - 7072r^7s^2t^2 + 4433r^2s^2t^8 + 2886r^2s^3t^7 - 2028r^2s^4t^6 - 2028r^2s^5t^5 - 2028r^2s^6t^4 - 2028r^2s^7t^3 - 21931r^2s^8t^2 - 3549r^3s^2t^7 + 4914r^3s^3t^6 - 2028r^3s^7t^2 - 3549r^4s^2t^6 + 4914r^4s^3t^5 - 2028r^4s^6t^2 - 3549r^5s^2t^5 + 4914r^5s^3t^4 - 2028r^5s^5t^2 - 3549r^6s^2t^4 + 4914r^6s^3t^3 - 2028r^6s^4t^2 - 3549r^7s^2t^3 + 2886r^7s^3t^2 + 4433r^8s^2t^2 - 955r^2s^2t^9 - 507r^2s^3t^8 + 312r^2s^4t^7 + 312r^2s^5t^6 + 312r^2s^6t^5 + 312r^2s^7t^4 + 312r^2s^8t^3 + 4199r^2s^9t^2 + 735r^3s^2t^8 - 819r^3s^3t^7 + 312r^3s^8t^2 + 735r^4s^2t^7 - 819r^4s^3t^6 + 312r^4s^7t^2 + 735r^5s^2t^6 - 819r^5s^3t^5 + 312r^5s^6t^2 + 735r^6s^2t^5 - 819r^6s^3t^4 + 312r^6s^5t^2 + 735r^7s^2t^4 - 819r^7s^3t^3 + 312r^7s^4t^2 + 735r^8s^2t^3 - 507r^8s^3t^2 - 955r^9s^2t^2))/(2162160s^3(r - s)^3(s - t)^3(s - 1)^3) - (r^2t^2(x - x_n)^6(5rs - 3rt + 5st - 7rs^2 - 7s^2t - 7s^2 + 9s^3 + 5rst))/(360h^2s^2(r - s)^3(s - t)^3(s - 1)^3) + (h^3rt(x - x_n)(1690r^7s^2 - 312r^3s^6 - 312r^4s^5 - 312r^5s^4 - 312r^6s^3 - 3887r^2s^7 + 9009r^2s^8 + 572r^3s^7 + 572r^4s^6 + 572r^5s^5 + 572r^6s^4 - 2002r^7s^3 - 780r^8s^2 - 6235r^2s^9 - 320r^3s^8 - 320r^4s^7 - 320r^5s^6 - 320r^6s^5 - 320r^7s^4 + 2020r^8s^3 - 385r^9s^2 + 1425r^2s^{10} + 60r^3s^9 + 60r^4s^8 + 60r^5s^7 + 60r^6s^6 + 60r^7s^5 + 60r^8s^4 - 525r^9s^3 + 210r^{10}s^2 - 884r^2t^7 + 546r^3t^6 + 546r^4t^5 + 546r^5t^4 + 546r^6t^3 - 884r^7t^2 + 780r^2t^8 - 364r^3t^7 - 364r^4t^6 - 364r^5t^5 - 364r^6t^4 - 364r^7t^3 + 780r^8t^2 - 190r^2t^9 + 70r^3t^8 + 70r^4t^7 + 70r^5t^6 + 70r^6t^5 + 70r^7t^4 + 70r^8t^3 - 190r^9t^2 + 1690s^2t^7 - 312s^3t^6 - 312s^4t^5 - 312s^5t^4 - 312s^6t^3 - 3887s^7t^2 - 780s^2t^8 - 2002s^3t^7 + 572s^4t^6 + 572s^5t^5 + 572s^6t^4 + 572s^7t^3 + 9009s^8t^2 - 385s^2t^9 + 2020s^3t^8 - 320s^4t^7 - 320s^5t^6 - 320s^6t^5 - 320s^7t^4 - 320s^8t^3 - 6235s^9t^2 + 210s^2t^{10} - 525s^3t^9 + 60s^4t^8 + 60s^5t^7 + 60s^6t^6 + 60s^7t^5 + 60s^8t^4 + 60s^9t^3 + 1425s^{10}t^2 + 4550rs^8 - 520r^8s - 10790rs^9 + 520r^9s + 7870rs^{10} - 140r^{10}s - 1890rs^{11} + 260rt^8 + 260r^8t - 260rt^9 - 260r^9t + 70rt^{10} + 70r^{10}t - 520st^8 + 4550s^8t + 520st^9 - 10790s^9t - 140st^{10} + 7870s^{10}t - 1890s^{11}t - 1365s^9 + 3315s^{10} - 2520s^{11} + 630s^{12} + 650rst^7 - 16588rs^7t + 650r^7st - 1040rst^8 + 38116rs^8t - 1040r^8st + 635rst^9 - 26260rs^9t + 635r^9st - 140rst^{10} + 5980rs^{10}t - 140r^{10}st - 6292rs^2t^6 + 1716rs^3t^5 + 1716rs^4t^4 + 1716rs^5t^3 + 16016rs^6t^2 + 3224r^2st^6 + 16016r^2s^6t - 4641r^3st^5 + 1716r^3s^5t - 4641r^4st^4 + 1716r^4s^4t - 4641r^5st^3 + 1716r^5s^3t + 3224r^6st^2 - 6292r^6s^2t + 3978rs^2t^7 + 7332rs^3t^6 - 2964rs^4t^5 - 2964rs^5t^4 - 2964rs^6t^3 - 35568rs^7t^2 - 936r^2st^7 - 35568r^2s^7t + 1638r^3st^6 - 2964r^3s^6t + 1638r^4st^5 - 2964r^4s^5t + 1638r^5st^4 - 2964r^5s^4t + 1638r^6st^3 + 7332r^6s^3t - 936r^7st^2 + 3978r^7s^2t - 325rs^2t^8 - 6448rs^3t^7 + 1508rs^4t^6 + 1508rs^5t^5 + 1508rs^6t^4 + 1508rs^7t^3 + 22646rs^8t^2 - 925r^2st^8 + 22646r^2s^8t + 245r^3st^7 + 1508r^3s^7t + 245r^4st^6 + 1508r^4s^6t + 245r^5st^5 + 1508r^5s^5t + 245r^6st^4 + 1508r^6s^4t + 245r^7st^3 - 6448r^7s^3t - 925r^8st^2 - 325r^8s^2t - 175rs^2t^9 + 1495rs^3t^8 - 260rs^4t^7 - 260rs^5t^6 - 260rs^6t^5 - 260rs^7t^4 - 260rs^8t^3 - 4810rs^9t^2 + 380r^2st^9 - 4810r^2s^9t - 140r^3st^8 - 260r^3s^8t - 140r^4st^7 - 260r^4s^7t - 140r^5st^6 - 260r^5s^6t - 140r^6st^5 - 260r^6s^5t - 140r^7st^4 - 260r^7s^4t - 140r^8st^3 + 1495r^8s^3t + 380r^9st^2 - 175r^9s^2t + 4147r^2s^2t^5 - 2860r^2s^3t^4 - 2860r^2s^4t^3 - 18590r^2s^5t^2 + 7007r^3s^2t^4 - 2860r^3s^4t^2 + 7007r^4s^2t^3 - 2860r^4s^3t^2 + 4147r^5s^2t^2 - 7072r^2s^2t^6 - 4433r^2s^3t^5 + 4576r^2s^4t^4 + 4576r^2s^5t^3 + 39182r^2s^6t^2 + 3367r^3s^2t^5 - 9009r^3s^3t^4 + 4576r^3s^5t^2 + 3367r^4s^2t^4 - 9009r^4s^3t^3 + 4576r^4s^4t^2 + 3367r^5s^2t^3 - 4433r^5s^3t^2 - 7072r^6s^2t^2 + 4433r^2s^2t^7 + 2886r^2s^3t^6 - 2028r^2s^4t^5 - 2028r^2s^5t^4 - 2028r^2s^6t^3 - 21931r^2s^7t^2 - 3549r^3s^2t^6 + 4914r^3s^3t^5 - 2028r^3s^6t^2 - 3549r^4s^2t^5 + 4914r^4s^3t^4 - 2028r^4s^5t^2 - 3549r^5s^2t^4 + 4914r^5s^3t^3 - 2028r^5s^4t^2 - 3549r^6s^2t^3 + 2886r^6s^3t^2 + 4433r^7s^2t^2 - 955r^2s^2t^8 - 507r^2s^3t^7 + 312r^2s^4t^6 + 312r^2s^5t^5 + 312r^2s^6t^4 + 312r^2s^7t^3 + 4199r^2s^8t^2 + 735r^3s^2t^7 - 819r^3s^3t^6 + 312r^3s^7t^2 + 735r^4s^2t^6 - 819r^4s^3t^5 + 312r^4s^6t^2 + 735r^5s^2t^5 - 819r^5s^3t^4 + 312r^5s^5t^2 + 735r^6s^2t^4 - 819r^6s^3t^3 + 312r^6s^4t^2 + 735r^7s^2t^3 - 507r^7s^3t^2 - 955r^8s^2t^2))/(2162160s^2(r - s)^3(s - t)^3(s - 1)^3) - (rt(x - x_n)^7(7r^2s^3 - 5r^2s^2 + r^2t^2 - 5s^2t^2 + 7s^3t^2 + 7rs^3 - 9rs^4 + 7s^3t - 9s^4t + rst^2 - 7rs^2t + r^2st + 17rs^3t - 9rs^4t - 7rs^2t^2 + r^2st^2 - 7r^2s^2t + 7rs^3t^2 + 7r^2s^3t - 5r^2s^2t^2))/(420h^3s^3(r - s)^3(s - t)^3(s - 1)^3),\\
    $
    $\\
    \beta_t=((x - x_n)^{12}(8rt - 12s^2t^2 - 4rs - 12r^2t^2 + 8st - 4rs^2 - 4r^2s - 19rt^2 + 8r^2t + 9rt^3 - 19st^2 + 8s^2t + 9st^3 - 12t^2 + 9t^3 + 9t^4 - 19rst^2 + 8rs^2t + 8r^2st + 21rst))/(11880h^8t^3(r - t)^3(s - t)^3(t - 1)^3) - (h(x - x_n)^3(546r^3s^7 - 884r^2s^8 + 546r^4s^6 + 546r^5s^5 + 546r^6s^4 + 546r^7s^3 - 884r^8s^2 + 780r^2s^9 - 364r^3s^8 - 364r^4s^7 - 364r^5s^6 - 364r^6s^5 - 364r^7s^4 - 364r^8s^3 + 780r^9s^2 - 190r^2s^{10} + 70r^3s^9 + 70r^4s^8 + 70r^5s^7 + 70r^6s^6 + 70r^7s^5 + 70r^8s^4 + 70r^9s^3 - 190r^{10}s^2 - 3887r^2t^8 - 312r^3t^7 - 312r^4t^6 - 312r^5t^5 - 312r^6t^4 - 312r^7t^3 + 1690r^8t^2 + 9009r^2t^9 + 572r^3t^8 + 572r^4t^7 + 572r^5t^6 + 572r^6t^5 + 572r^7t^4 - 2002r^8t^3 - 780r^9t^2 - 6235r^2t^{10} - 320r^3t^9 - 320r^4t^8 - 320r^5t^7 - 320r^6t^6 - 320r^7t^5 - 320r^8t^4 + 2020r^9t^3 - 385r^{10}t^2 + 1425r^2t^{11} + 60r^3t^{10} + 60r^4t^9 + 60r^5t^8 + 60r^6t^7 + 60r^7t^6 + 60r^8t^5 + 60r^9t^4 - 525r^{10}t^3 + 210r^{11}t^2 - 3887s^2t^8 - 312s^3t^7 - 312s^4t^6 - 312s^5t^5 - 312s^6t^4 - 312s^7t^3 + 1690s^8t^2 + 9009s^2t^9 + 572s^3t^8 + 572s^4t^7 + 572s^5t^6 + 572s^6t^5 + 572s^7t^4 - 2002s^8t^3 - 780s^9t^2 - 6235s^2t^{10} - 320s^3t^9 - 320s^4t^8 - 320s^5t^7 - 320s^6t^6 - 320s^7t^5 - 320s^8t^4 + 2020s^9t^3 - 385s^{10}t^2 + 1425s^2t^{11} + 60s^3t^{10} + 60s^4t^9 + 60s^5t^8 + 60s^6t^7 + 60s^7t^6 + 60s^8t^5 + 60s^9t^4 - 525s^{10}t^3 + 210s^{11}t^2 + 260rs^9 + 260r^9s - 260rs^{10} - 260r^{10}s + 70rs^{11} + 70r^{11}s + 4550rt^9 - 520r^9t - 10790rt^{10} + 520r^{10}t + 7870rt^{11} - 140r^{11}t - 1890rt^{12} + 4550st^9 - 520s^9t - 10790st^{10} + 520s^{10}t + 7870st^{11} - 140s^{11}t - 1890st^{12} - 1365t^{10} + 3315t^{11} - 2520t^{12} + 630t^{13} - 16588rst^8 + 650rs^8t + 650r^8st + 38116rst^9 - 1040rs^9t - 1040r^9st - 26260rst^{10} + 635rs^{10}t + 635r^{10}st + 5980rst^{11} - 140rs^{11}t - 140r^{11}st + 16016rs^2t^7 + 1716rs^3t^6 + 1716rs^4t^5 + 1716rs^5t^4 + 1716rs^6t^3 - 6292rs^7t^2 + 16016r^2st^7 + 3224r^2s^7t + 1716r^3st^6 - 4641r^3s^6t + 1716r^4st^5 - 4641r^4s^5t + 1716r^5st^4 - 4641r^5s^4t + 1716r^6st^3 - 4641r^6s^3t - 6292r^7st^2 + 3224r^7s^2t - 35568rs^2t^8 - 2964rs^3t^7 - 2964rs^4t^6 - 2964rs^5t^5 - 2964rs^6t^4 + 7332rs^7t^3 + 3978rs^8t^2 - 35568r^2st^8 - 936r^2s^8t - 2964r^3st^7 + 1638r^3s^7t - 2964r^4st^6 + 1638r^4s^6t - 2964r^5st^5 + 1638r^5s^5t - 2964r^6st^4 + 1638r^6s^4t + 7332r^7st^3 + 1638r^7s^3t + 3978r^8st^2 - 936r^8s^2t + 22646rs^2t^9 + 1508rs^3t^8 + 1508rs^4t^7 + 1508rs^5t^6 + 1508rs^6t^5 + 1508rs^7t^4 - 6448rs^8t^3 - 325rs^9t^2 + 22646r^2st^9 - 925r^2s^9t + 1508r^3st^8 + 245r^3s^8t + 1508r^4st^7 + 245r^4s^7t + 1508r^5st^6 + 245r^5s^6t + 1508r^6st^5 + 245r^6s^5t + 1508r^7st^4 + 245r^7s^4t - 6448r^8st^3 + 245r^8s^3t - 325r^9st^2 - 925r^9s^2t - 4810rs^2t^{10} - 260rs^3t^9 - 260rs^4t^8 - 260rs^5t^7 - 260rs^6t^6 - 260rs^7t^5 - 260rs^8t^4 + 1495rs^9t^3 - 175rs^{10}t^2 - 4810r^2st^{10} + 380r^2s^{10}t - 260r^3st^9 - 140r^3s^9t - 260r^4st^8 - 140r^4s^8t - 260r^5st^7 - 140r^5s^7t - 260r^6st^6 - 140r^6s^6t - 260r^7st^5 - 140r^7s^5t - 260r^8st^4 - 140r^8s^4t + 1495r^9st^3 - 140r^9s^3t - 175r^{10}st^2 + 380r^{10}s^2t - 18590r^2s^2t^6 - 2860r^2s^3t^5 - 2860r^2s^4t^4 - 2860r^2s^5t^3 + 4147r^2s^6t^2 - 2860r^3s^2t^5 + 7007r^3s^5t^2 - 2860r^4s^2t^4 + 7007r^4s^4t^2 - 2860r^5s^2t^3 + 7007r^5s^3t^2 + 4147r^6s^2t^2 + 39182r^2s^2t^7 + 4576r^2s^3t^6 + 4576r^2s^4t^5 + 4576r^2s^5t^4 - 4433r^2s^6t^3 - 7072r^2s^7t^2 + 4576r^3s^2t^6 - 9009r^3s^5t^3 + 3367r^3s^6t^2 + 4576r^4s^2t^5 - 9009r^4s^4t^3 + 3367r^4s^5t^2 + 4576r^5s^2t^4 - 9009r^5s^3t^3 + 3367r^5s^4t^2 - 4433r^6s^2t^3 + 3367r^6s^3t^2 - 7072r^7s^2t^2 - 21931r^2s^2t^8 - 2028r^2s^3t^7 - 2028r^2s^4t^6 - 2028r^2s^5t^5 - 2028r^2s^6t^4 + 2886r^2s^7t^3 + 4433r^2s^8t^2 - 2028r^3s^2t^7 + 4914r^3s^6t^3 - 3549r^3s^7t^2 - 2028r^4s^2t^6 + 4914r^4s^5t^3 - 3549r^4s^6t^2 - 2028r^5s^2t^5 + 4914r^5s^4t^3 - 3549r^5s^5t^2 - 2028r^6s^2t^4 + 4914r^6s^3t^3 - 3549r^6s^4t^2 + 2886r^7s^2t^3 - 3549r^7s^3t^2 + 4433r^8s^2t^2 + 4199r^2s^2t^9 + 312r^2s^3t^8 + 312r^2s^4t^7 + 312r^2s^5t^6 + 312r^2s^6t^5 + 312r^2s^7t^4 - 507r^2s^8t^3 - 955r^2s^9t^2 + 312r^3s^2t^8 - 819r^3s^7t^3 + 735r^3s^8t^2 + 312r^4s^2t^7 - 819r^4s^6t^3 + 735r^4s^7t^2 + 312r^5s^2t^6 - 819r^5s^5t^3 + 735r^5s^6t^2 + 312r^6s^2t^5 - 819r^6s^4t^3 + 735r^6s^5t^2 + 312r^7s^2t^4 - 819r^7s^3t^3 + 735r^7s^4t^2 - 507r^8s^2t^3 + 735r^8s^3t^2 - 955r^9s^2t^2))/(2162160t^3(r - t)^3(s - t)^3(t - 1)^3) + ((x - x_n)^8(5r^3t^2 - 4r^3s^2 - 4r^3s^3 - 7r^2t^3 - 4r^2s^3 + 9r^2t^4 - 7r^3t^3 - 7s^2t^3 + 5s^3t^2 + 9s^2t^4 - 7s^3t^3 - 28rst^3 + 5rs^3t + 5r^3st + 36rst^4 + 13rs^2t^2 + 13r^2st^2 + 4r^2s^2t - 47rs^2t^3 + 13rs^3t^2 - 47r^2st^3 + 4r^2s^3t + 13r^3st^2 + 4r^3s^2t + 36rs^2t^4 - 28rs^3t^3 + 36r^2st^4 - 28r^3st^3 + 5r^3s^3t + 24r^2s^2t^2 - 47r^2s^2t^3 + 13r^2s^3t^2 + 13r^3s^2t^2 + 9r^2s^2t^4 - 7r^2s^3t^3 - 7r^3s^2t^3 + 5r^3s^3t^2))/(1680h^4t^3(r - t)^3(s - t)^3(t - 1)^3) - ((x - x_n)^9(2r^2t^2 - 4r^2s^3 - 4r^3s^2 - r^3s^3 - 4r^2s^2 - 10r^2t^3 + 2r^3t^2 + 9r^2t^4 - 7r^3t^3 + 2s^2t^2 - 10s^2t^3 + 2s^3t^2 + 9s^2t^4 - 7s^3t^3 - rs^3 - r^3s - 7rt^3 + 2r^3t + 9rt^4 - 7st^3 + 2s^3t + 9st^4 - 2rst^2 + 7rs^2t + 7r^2st - 26rst^3 + 7rs^3t + 7r^3st + 36rst^4 + 3rs^2t^2 + 3r^2st^2 + 12r^2s^2t - 26rs^2t^3 - 2rs^3t^2 - 26r^2st^3 + 7r^2s^3t - 2r^3st^2 + 7r^3s^2t + 9rs^2t^4 - 7rs^3t^3 + 9r^2st^4 - 7r^3st^3 + 2r^3s^3t + 3r^2s^2t^2 - 10r^2s^2t^3 + 2r^2s^3t^2 + 2r^3s^2t^2))/(1512h^5t^3(r - t)^3(s - t)^3(t - 1)^3) - ((x - x_n)^{10}(16r^2s^2 + 4r^2s^3 + 4r^3s^2 + 4r^2t^2 + 19r^2t^3 + 7r^3t^2 - 9r^2t^4 + 7r^3t^3 + 4s^2t^2 + 19s^2t^3 + 7s^3t^2 - 9s^2t^4 + 7s^3t^3 + 4rs^2 + 4r^2s + 4rs^3 + 4r^3s + 7rt^2 - 8r^2t + 19rt^3 - 8r^3t - 36rt^4 + 7st^2 - 8s^2t + 19st^3 - 8s^3t - 36st^4 + 7t^3 - 9t^4 + 27rst^2 - 36rs^2t - 36r^2st + 20rst^3 - 13rs^3t - 13r^3st - 36
    rst^4 + 27rs^2t^2 + 27r^2st^2 - 36r^2s^2t + 19rs^2t^3 + 7rs^3t^2 + 19r^2st^3 - 8r^2s^3t + 7r^3st^2 - 8r^3s^2t - 13rst + 4r^2s^2t^2))/(5040h^6t^3(r - t)^3(s - t)^3(t - 1)^3) + (h^2(x - x_n)^2(260r^2s^9 - 884r^3s^8 + 546r^4s^7 + 546r^5s^6 + 546r^6s^5 + 546r^7s^4 - 884r^8s^3 + 260r^9s^2 - 260r^2s^{10} + 780r^3s^9 - 364r^4s^8 - 364r^5s^7 - 364r^6s^6 - 364r^7s^5 - 364r^8s^4 + 780r^9s^3 - 260r^{10}s^2 + 70r^2s^{11} - 190r^3s^{10} + 70r^4s^9 + 70r^5s^8 + 70r^6s^7 + 70r^7s^6 + 70r^8s^5 + 70r^9s^4 - 190r^{10}s^3 + 70r^{11}s^2 + 4550r^2t^9 - 3887r^3t^8 - 312r^4t^7 - 312r^5t^6 - 312r^6t^5 - 312r^7t^4 + 1690r^8t^3 - 520r^9t^2 - 10790r^2t^{10} + 9009r^3t^9 + 572r^4t^8 + 572r^5t^7 + 572r^6t^6 + 572r^7t^5 - 2002r^8t^4 - 780r^9t^3 + 520r^{10}t^2 + 7870r^2t^{11} - 6235r^3t^{10} - 320r^4t^9 - 320r^5t^8 - 320r^6t^7 - 320r^7t^6 - 320r^8t^5 + 2020r^9t^4 - 385r^{10}t^3 - 140r^{11}t^2 - 1890r^2t^{12} + 1425r^3t^{11} + 60r^4t^{10} + 60r^5t^9 + 60r^6t^8 + 60r^7t^7 + 60r^8t^6 + 60r^9t^5 - 525r^{10}t^4 + 210r^{11}t^3 + 4550s^2t^9 - 3887s^3t^8 - 312s^4t^7 - 312s^5t^6 - 312s^6t^5 - 312s^7t^4 + 1690s^8t^3 - 520s^9t^2 - 10790s^2t^{10} + 9009s^3t^9 + 572s^4t^8 + 572s^5t^7 + 572s^6t^6 + 572s^7t^5 - 2002s^8t^4 - 780s^9t^3 + 520s^{10}t^2 + 7870s^2t^{11} - 6235s^3t^{10} - 320s^4t^9 - 320s^5t^8 - 320s^6t^7 - 320s^7t^6 - 320s^8t^5 + 2020s^9t^4 - 385s^{10}t^3 - 140s^{11}t^2 - 1890s^2t^{12} + 1425s^3t^{11} + 60s^4t^{10} + 60s^5t^9 + 60s^6t^8 + 60s^7t^7 + 60s^8t^6 + 60s^9t^5 - 525s^{10}t^4 + 210s^{11}t^3 - 1365rt^{10} + 3315rt^{11} - 2520rt^{12} + 630rt^{13} - 1365st^{10} + 3315st^{11} - 2520st^{12} + 630st^{13} + 9100rst^9 - 260rs^9t - 260r^9st - 21580rst^{10} + 260rs^{10}t + 260r^{10}st + 15740rst^{11} - 70rs^{11}t - 70r^{11}st - 3780rst^{12} - 20475rs^2t^8 + 15704rs^3t^7 + 1404rs^4t^6 + 1404rs^5t^5 + 1404rs^6t^4 - 6604rs^7t^3 + 2340rs^8t^2 - 20475r^2st^8 - 234r^2s^8t + 15704r^3st^7 + 3770r^3s^7t + 1404r^4st^6 - 4095r^4s^6t + 1404r^5st^5 - 4095r^5s^5t + 1404r^6st^4 - 4095r^6s^4t - 6604r^7st^3 + 3770r^7s^3t + 2340r^8st^2 - 234r^8s^2t + 47125rs^2t^9 - 34996rs^3t^8 - 2392rs^4t^7 - 2392rs^5t^6 - 2392rs^6t^5 + 7904rs^7t^4 + 1976rs^8t^3 - 1820rs^9t^2 + 47125r^2st^9 - 260r^2s^9t - 34996r^3st^8 - 1300r^3s^8t - 2392r^4st^7 + 1274r^4s^7t - 2392r^5st^6 + 1274r^5s^6t - 2392r^6st^5 + 1274r^6s^5t + 7904r^7st^4 + 1274r^7s^4t + 1976r^8st^3 - 1300r^8s^3t - 1820r^9st^2 - 260r^9s^2t - 32495rs^2t^{10} + 22326rs^3t^9 + 1188rs^4t^8 + 1188rs^5t^7 + 1188rs^6t^6 + 1188rs^7t^5 - 6768rs^8t^4 + 1695rs^9t^3 + 250rs^{10}t^2 - 32495r^2st^{10} + 445r^2s^{10}t + 22326r^3st^9 - 855r^3s^9t + 1188r^4st^8 + 315r^4s^8t + 1188r^5st^7 + 315r^5s^7t + 1188r^6st^6 + 315r^6s^6t + 1188r^7st^5 + 315r^7s^5t - 6768r^8st^4 + 315r^8s^4t + 1695r^9st^3 - 855r^9s^3t + 250r^{10}st^2 + 445r^{10}s^2t + 7405rs^2t^{11} - 4750rs^3t^{10} - 200rs^4t^9 - 200rs^5t^8 - 200rs^6t^7 - 200rs^7t^6 - 200rs^8t^5 + 1555rs^9t^4 - 700rs^{10}t^3 + 70rs^{11}t^2 + 7405r^2st^{11} - 140r^2s^{11}t - 4750r^3st^{10} + 380r^3s^{10}t - 200r^4st^9 - 140r^4s^9t - 200r^5st^8 - 140r^5s^8t - 200r^6st^7 - 140r^6s^7t - 200r^7st^6 - 140r^7s^6t - 200r^8st^5 - 140r^8s^5t + 1555r^9st^4 - 140r^9s^4t - 700r^{10}st^3 + 380r^{10}s^3t + 70r^{11}st^2 - 140r^{11}s^2t + 32032r^2s^2t^7 - 16874r^2s^3t^6 - 1144r^2s^4t^5 - 1144r^2s^5t^4 + 5863r^2s^6t^3 - 3068r^2s^7t^2 - 16874r^3s^2t^6 - 5720r^3s^3t^5 - 2860r^3s^4t^4 + 4147r^3s^5t^3 - 494r^3s^6t^2 - 1144r^4s^2t^5 - 2860r^4s^3t^4 + 7007r^4s^4t^3 + 2366r^4s^5t^2 - 1144r^5s^2t^4 + 4147r^5s^3t^3 + 2366r^5s^4t^2 + 5863r^6s^2t^3 - 494r^6s^3t^2 - 3068r^7s^2t^2 - 71136r^2s^2t^8 + 36218r^2s^3t^7 + 1612r^2s^4t^6 + 1612r^2s^5t^5 - 7397r^2s^6t^4 + 260r^2s^7t^3 + 3042r^2s^8t^2 + 36218r^3s^2t^7 + 9152r^3s^3t^6 + 4576r^3s^4t^5 - 4433r^3s^5t^4 - 1066r^3s^6t^3 - 5434r^3s^7t^2 + 1612r^4s^2t^6 + 4576r^4s^3t^5 - 9009r^4s^4t^4 - 5642r^4s^5t^3 + 5005r^4s^6t^2 + 1612r^5s^2t^5 - 4433r^5s^3t^4 - 5642r^5s^4t^3 + 5005r^5s^5t^2 - 7397r^6s^2t^4 - 1066r^6s^3t^3 + 5005r^6s^4t^2 + 260r^7s^2t^3 - 5434r^7s^3t^2 + 3042r^8s^2t^2 + 45292r^2s^2t^9 - 20423r^2s^3t^8 - 520r^2s^4t^7 - 520r^2s^5t^6 - 520r^2s^6t^5 + 4394r^2s^7t^4 - 2015r^2s^8t^3 - 1250r^2s^9t^2 - 20423r^3s^2t^8 - 4056r^3s^3t^7 - 2028r^3s^4t^6 - 2028r^3s^5t^5 + 2886r^3s^6t^4 - 663r^3s^7t^3 + 4678r^3s^8t^2 - 520r^4s^2t^7 - 2028r^4s^3t^6 + 4914r^4s^5t^4 + 1365r^4s^6t^3 - 3304r^4s^7t^2 - 520r^5s^2t^6 - 2028r^5s^3t^5 + 4914r^5s^4t^4 + 1365r^5s^5t^3 - 3304r^5s^6t^2 - 520r^6s^2t^5 + 2886r^6s^3t^4 + 1365r^6s^4t^3 - 3304r^6s^5t^2 + 4394r^7s^2t^4 - 663r^7s^3t^3 - 3304r^7s^4t^2 - 2015r^8s^2t^3 + 4678r^8s^3t^2 - 1250r^9s^2t^2 - 9620r^2s^2t^{10} + 3939r^2s^3t^9 + 52r^2s^4t^8 + 52r^2s^5t^7 + 52r^2s^6t^6 + 52r^2s^7t^5 - 767r^2s^8t^4 + 540r^2s^9t^3 + 205r^2s^{10}t^2 + 3939r^3s^2t^9 + 624r^3s^3t^8 + 312r^3s^4t^7 + 312r^3s^5t^6 + 312r^3s^6t^5 - 507r^3s^7t^4 + 228r^3s^8t^3 - 1095r^3s^9t^2 + 52r^4s^2t^8 + 312r^4s^3t^7 - 819r^4s^6t^4 - 84r^4s^7t^3 + 595r^4s^8t^2 + 52r^5s^2t^7 + 312r^5s^3t^6 - 819r^5s^5t^4 - 84r^5s^6t^3 + 595r^5s^7t^2 + 52r^6s^2t^6 + 312r^6s^3t^5 - 819r^6s^4t^4 - 84r^6s^5t^3 + 595r^6s^6t^2 + 52r^7s^2t^5 - 507r^7s^3t^4 - 84r^7s^4t^3 + 595r^7s^5t^2 - 767r^8s^2t^4 + 228r^8s^3t^3 + 595r^8s^4t^2 + 540r^9s^2t^3 - 1095r^9s^3t^2 + 205r^{10}s^2t^2))\\/(2162160t^3(r - t)^3(s - t)^3(t - 1)^3) + ((x - x_n)^{13}(rs - 2rt - 2st + 3rt^2 + 3st^2 + 3t^2 - 4t^3 - 2rst))/(8580h^9t^3(r - t)^3(s - t)^3(t - 1)^3) + ((x - x_n)^{11}(4r^2s^2 + 10r^2t^2 + 3r^2t^3 + 3r^3t^2 + 10s^2t^2 + 3s^2t^3 + 3s^3t^2 + rs - 2rt - 2st + 4rs^2 + 4r^2s + rs^3 + r^3s + 10rt^2 - 8r^2t - 2rt^3 - 2r^3t - 9rt^4 + 10st^2 - 8s^2t - 2st^3 - 2s^3t - 9st^4 + 3t^2 + 3t^3 - 9t^4 + 21rst^2 - 15rs^2t - 15r^2st - 2rst^3 - 2rs^3t - 2r^3st + 10rs^2t^2 + 10r^2st^2 - 8r^2s^2t - 15rst))/(3960h^7t^3(r - t)^3(s - t)^3(t - 1)^3) - (r^2s^2(x - x_n)^6(3rs - 5rt - 5st + 7rt^2 + 7st^2 + 7t^2 - 9t^3 - 5rst))/(360h^2t^2(r - t)^3(s - t)^3(t - 1)^3) - (h^3rs(x - x_n)(546r^3s^6 - 884r^2s^7 + 546r^4s^5 + 546
    r^5s^4 + 546r^6s^3 - 884r^7s^2 + 780r^2s^8 - 364r^3s^7 - 364r^4s^6 - 364r^5s^5 - 364r^6s^4 - 364r^7s^3 + 780r^8s^2 - 190r^2s^9 + 70r^3s^8 + 70r^4s^7 + 70r^5s^6 + 70r^6s^5 + 70r^7s^4 + 70r^8s^3 - 190r^9s^2 - 3887r^2t^7 - 312r^3t^6 - 312r^4t^5 - 312r^5t^4 - 312r^6t^3 + 1690r^7t^2 + 9009r^2t^8 + 572r^3t^7 + 572r^4t^6 + 572r^5t^5 + 572r^6t^4 - 2002r^7t^3 - 780r^8t^2 - 6235r^2t^9 - 320r^3t^8 - 320r^4t^7 - 320r^5t^6 - 320r^6t^5 - 320r^7t^4 + 2020r^8t^3 - 385r^9t^2 + 1425r^2t^{10} + 60r^3t^9 + 60r^4t^8 + 60r^5t^7 + 60r^6t^6 + 60r^7t^5 + 60r^8t^4 - 525r^9t^3 + 210r^{10}t^2 - 3887s^2t^7 - 312s^3t^6 - 312s^4t^5 - 312s^5t^4 - 312s^6t^3 + 1690s^7t^2 + 9009s^2t^8 + 572s^3t^7 + 572s^4t^6 + 572s^5t^5 + 572s^6t^4 - 2002s^7t^3 - 780s^8t^2 - 6235s^2t^9 - 320s^3t^8 - 320s^4t^7 - 320s^5t^6 - 320s^6t^5 - 320s^7t^4 + 2020s^8t^3 - 385s^9t^2 + 1425s^2t^{10} + 60s^3t^9 + 60s^4t^8 + 60s^5t^7 + 60s^6t^6 + 60s^7t^5 + 60s^8t^4 - 525s^9t^3 + 210s^{10}t^2 + 260rs^8 + 260r^8s - 260rs^9 - 260r^9s + 70rs^{10} + 70r^{10}s + 4550rt^8 - 520r^8t - 10790rt^9 + 520r^9t + 7870rt^{10} - 140r^{10}t - 1890rt^{11} + 4550st^8 - 520s^8t - 10790st^9 + 520s^9t + 7870st^{10} - 140s^{10}t - 1890st^{11} - 1365t^9 + 3315t^{10} - 2520t^{11} + 630t^{12} - 16588rst^7 + 650rs^7t + 650r^7st + 38116rst^8 - 1040rs^8t - 1040r^8st - 26260rst^9 + 635rs^9t + 635r^9st + 5980rst^{10} - 140rs^{10}t - 140r^{10}st + 16016rs^2t^6 + 1716rs^3t^5 + 1716rs^4t^4 + 1716rs^5t^3 - 6292rs^6t^2 + 16016r^2st^6 + 3224r^2s^6t + 1716r^3st^5 - 4641r^3s^5t + 1716r^4st^4 - 4641r^4s^4t + 1716r^5st^3 - 4641r^5s^3t - 6292r^6st^2 + 3224r^6s^2t - 35568rs^2t^7 - 2964rs^3t^6 - 2964rs^4t^5 - 2964rs^5t^4 + 7332rs^6t^3 + 3978rs^7t^2 - 35568r^2st^7 - 936r^2s^7t - 2964r^3st^6 + 1638r^3s^6t - 2964r^4st^5 + 1638r^4s^5t - 2964r^5st^4 + 1638r^5s^4t + 7332r^6st^3 + 1638r^6s^3t + 3978r^7st^2 - 936r^7s^2t + 22646rs^2t^8 + 1508rs^3t^7 + 1508rs^4t^6 + 1508rs^5t^5 + 1508rs^6t^4 - 6448rs^7t^3 - 325rs^8t^2 + 22646r^2st^8 - 925r^2s^8t + 1508r^3st^7 + 245r^3s^7t + 1508r^4st^6 + 245r^4s^6t + 1508r^5st^5 + 245r^5s^5t + 1508r^6st^4 + 245r^6s^4t - 6448r^7st^3 + 245r^7s^3t - 325r^8st^2 - 925r^8s^2t - 4810rs^2t^9 - 260rs^3t^8 - 260rs^4t^7 - 260rs^5t^6 - 260rs^6t^5 - 260rs^7t^4 + 1495rs^8t^3 - 175rs^9t^2 - 4810r^2st^9 + 380r^2s^9t - 260r^3st^8 - 140r^3s^8t - 260r^4st^7 - 140r^4s^7t - 260r^5st^6 - 140r^5s^6t - 260r^6st^5 - 140r^6s^5t - 260r^7st^4 - 140r^7s^4t + 1495r^8st^3 - 140r^8s^3t - 175r^9st^2 + 380r^9s^2t - 18590r^2s^2t^5 - 2860r^2s^3t^4 - 2860r^2s^4t^3 + 4147r^2s^5t^2 - 2860r^3s^2t^4 + 7007r^3s^4t^2 - 2860r^4s^2t^3 + 7007r^4s^3t^2 + 4147r^5s^2t^2 + 39182r^2s^2t^6 + 4576r^2s^3t^5 + 4576r^2s^4t^4 - 4433r^2s^5t^3 - 7072r^2s^6t^2 + 4576r^3s^2t^5 - 9009r^3s^4t^3 + 3367r^3s^5t^2 + 4576r^4s^2t^4 - 9009r^4s^3t^3 + 3367r^4s^4t^2 - 4433r^5s^2t^3 + 3367r^5s^3t^2 - 7072r^6s^2t^2 - 21931r^2s^2t^7 - 2028r^2s^3t^6 - 2028r^2s^4t^5 - 2028r^2s^5t^4 + 2886r^2s^6t^3 + 4433r^2s^7t^2 - 2028r^3s^2t^6 + 4914r^3s^5t^3 - 3549r^3s^6t^2 - 2028r^4s^2t^5 + 4914r^4s^4t^3 - 3549r^4s^5t^2 - 2028r^5s^2t^4 + 4914r^5s^3t^3 - 3549r^5s^4t^2 + 2886r^6s^2t^3 - 3549r^6s^3t^2 + 4433r^7s^2t^2 + 4199r^2s^2t^8 + 312r^2s^3t^7 + 312r^2s^4t^6 + 312r^2s^5t^5 + 312r^2s^6t^4 - 507r^2s^7t^3 - 955r^2s^8t^2 + 312r^3s^2t^7 - 819r^3s^6t^3 + 735r^3s^7t^2 + 312r^4s^2t^6 - 819r^4s^5t^3 + 735r^4s^6t^2 + 312r^5s^2t^5 - 819r^5s^4t^3 + 735r^5s^5t^2 + 312r^6s^2t^4 - 819r^6s^3t^3 + 735r^6s^4t^2 - 507r^7s^2t^3 + 735r^7s^3t^2 - 955r^8s^2t^2))/(2162160t^2(r - t)^3(s - t)^3(t - 1)^3) + (rs(x - x_n)^7(r^2s^2 - 5r^2t^2 + 7r^2t^3 - 5s^2t^2 + 7s^2t^3 + 7rt^3 - 9rt^4 + 7st^3 - 9st^4 - 7rst^2 + rs^2t + r^2st + 17rst^3 - 9rst^4 - 7rs^2t^2 - 7r^2st^2 + r^2s^2t + 7rs^2t^3 + 7r^2st^3 - 5r^2s^2t^2))/(420h^3t^3(r - t)^3(s - t)^3(t - 1)^3),\\\\
    \beta_1 =(h(x - x_n)^3(819r^2s^7 + 819r^3s^6 + 819r^4s^5 + 819r^5s^4 + 819r^6s^3 + 819r^7s^2 + 448r^2s^8 - 1554r^3s^7 - 1554r^4s^6 - 1554r^5s^5 - 1554r^6s^4 - 1554r^7s^3 + 448r^8s^2 - 1335r^2s^9 + 875r^3s^8 + 875r^4s^7 + 875r^5s^6 + 875r^6s^5 + 875r^7s^4 + 875r^8s^3 - 1335r^9s^2 + 380r^2s^{10} - 140r^3s^9 - 140r^4s^8 - 140r^5s^7 - 140r^6s^6 - 140r^7s^5 - 140r^8s^4 - 140r^9s^3 + 380r^{10}s^2 + 819r^2t^7 + 819r^3t^6 + 819r^4t^5 + 819r^5t^4 + 819r^6t^3 + 819r^7t^2 + 448r^2t^8 - 1554r^3t^7 - 1554r^4t^6 - 1554r^5t^5 - 1554r^6t^4 - 1554r^7t^3 + 448r^8t^2 - 1335r^2t^9 + 875r^3t^8 + 875r^4t^7 + 875r^5t^6 + 875r^6t^5 + 875r^7t^4 + 875r^8t^3 - 1335r^9t^2 + 380r^2t^{10} - 140r^3t^9 - 140r^4t^8 - 140r^5t^7 - 140r^6t^6 - 140r^7t^5 - 140r^8t^4 - 140r^9t^3 + 380r^{10}t^2 + 819s^2t^7 + 819s^3t^6 + 819s^4t^5 + 819s^5t^4 + 819s^6t^3 + 819s^7t^2 + 448s^2t^8 - 1554s^3t^7 - 1554s^4t^6 - 1554s^5t^5 - 1554s^6t^4 - 1554s^7t^3 + 448s^8t^2 - 1335s^2t^9 + 875s^3t^8 + 875s^4t^7 + 875s^5t^6 + 875s^6t^5 + 875s^7t^4 + 875s^8t^3 - 1335s^9t^2 + 380s^2t^{10} - 140s^3t^9 - 140s^4t^8 - 140s^5t^7 - 140s^6t^6 - 140s^7t^5 - 140s^8t^4 - 140s^9t^3 + 380s^{10}t^2 - 1755rs^8 - 1755r^8s + 1670rs^9 + 1670r^9s - 35rs^{10} - 35r^{10}s - 140rs^{11} - 140r^{11}s - 1755rt^8 - 1755r^8t + 1670rt^9 + 1670r^9t - 35rt^{10} - 35r^{10}t - 140rt^{11} - 140r^{11}t - 1755st^8 - 1755s^8t + 1670st^9 + 1670s^9t - 35st^{10} - 35s^{10}t - 140st^{11} - 140s^{11}t + 585r^9 - 735r^{10} + 210r^{11} + 585s^9 - 735s^{10} + 210s^{11} + 585t^9 - 735t^{10} + 210t^{11} + 6201rst^7 + 6201rs^7t + 6201r^7st - 4453rst^8 - 4453rs^8t - 4453r^8st - 995rst^9 - 995rs^9t - 995r^9st + 425rst^{10} + 425rs^{10}t + 425r^{10}st + 70rst^{11} + 70rs^{11}t + 70r^{11}st - 4095rs^2t^6 - 4095rs^3t^5 - 4095rs^4t^4 - 4095rs^5t^3 - 4095rs^6t^2 - 4095r^2st^6 - 4095r^2s^6t - 4095r^3st^5 - 4095r^3s^5t - 4095r^4st^4 - 4095r^4s^4t - 4095r^5st^3 - 4095r^5s^3t - 4095r^6st^2 - 4095r^6s^2t - 1099rs^2t^7 + 6909rs^3t^6 + 6909rs^4
    t^5 + 6909rs^5t^4 + 6909rs^6t^3 - 1099rs^7t^2 - 1099r^2st^7 - 1099r^2s^7t + 6909r^3st^6 + 6909r^3s^6t + 6909r^4st^5 + 6909r^4s^5t + 6909r^5st^4 + 6909r^5s^4t + 6909r^6st^3 + 6909r^6s^3t - 1099r^7st^2 - 1099r^7s^2t + 4023rs^2t^8 - 2919rs^3t^7 - 2919rs^4t^6 - 2919rs^5t^5 - 2919rs^6t^4 - 2919rs^7t^3 + 4023rs^8t^2 + 4023r^2st^8 + 4023r^2s^8t - 2919r^3st^7 - 2919r^3s^7t - 2919r^4st^6 - 2919r^4s^6t - 2919r^5st^5 - 2919r^5s^5t - 2919r^6st^4 - 2919r^6s^4t - 2919r^7st^3 - 2919r^7s^3t + 4023r^8st^2 + 4023r^8s^2t - 355rs^2t^9 + 35rs^3t^8 + 35rs^4t^7 + 35rs^5t^6 + 35rs^6t^5 + 35rs^7t^4 + 35rs^8t^3 - 355rs^9t^2 - 355r^2st^9 - 355r^2s^9t + 35r^3st^8 + 35r^3s^8t + 35r^4st^7 + 35r^4s^7t + 35r^5st^6 + 35r^5s^6t + 35r^6st^5 + 35r^6s^5t + 35r^7st^4 + 35r^7s^4t + 35r^8st^3 + 35r^8s^3t - 355r^9st^2 - 355r^9s^2t - 190rs^2t^{10} + 70rs^3t^9 + 70rs^4t^8 + 70rs^5t^7 + 70rs^6t^6 + 70rs^7t^5 + 70rs^8t^4 + 70rs^9t^3 - 190rs^{10}t^2 - 190r^2st^{10} - 190r^2s^{10}t + 70r^3st^9 + 70r^3s^9t + 70r^4st^8 + 70r^4s^8t + 70r^5st^7 + 70r^5s^7t + 70r^6st^6 + 70r^6s^6t + 70r^7st^5 + 70r^7s^5t + 70r^8st^4 + 70r^8s^4t + 70r^9st^3 + 70r^9s^3t - 190r^{10}st^2 - 190r^{10}s^2t + 4914r^2s^2t^5 + 4914r^2s^3t^4 + 4914r^2s^4t^3 + 4914r^2s^5t^2 + 4914r^3s^2t^4 + 4914r^3s^3t^3 + 4914r^3s^4t^2 + 4914r^4s^2t^3 + 4914r^4s^3t^2 + 4914r^5s^2t^2 + 1540r^2s^2t^6 - 5467r^2s^3t^5 - 5467r^2s^4t^4 - 5467r^2s^5t^3 + 1540r^2s^6t^2 - 5467r^3s^2t^5 - 12474r^3s^3t^4 - 12474r^3s^4t^3 - 5467r^3s^5t^2 - 5467r^4s^2t^4 - 12474r^4s^3t^3 - 5467r^4s^4t^2 - 5467r^5s^2t^3 - 5467r^5s^3t^2 + 1540r^6s^2t^2 - 2113r^2s^2t^7 - 1190r^2s^3t^6 - 1190r^2s^4t^5 - 1190r^2s^5t^4 - 1190r^2s^6t^3 - 2113r^2s^7t^2 - 1190r^3s^2t^6 + 10458r^3s^3t^5 + 10458r^3s^4t^4 + 10458r^3s^5t^3 - 1190r^3s^6t^2 - 1190r^4s^2t^5 + 10458r^4s^3t^4 + 10458r^4s^4t^3 - 1190r^4s^5t^2 - 1190r^5s^2t^4 + 10458r^5s^3t^3 - 1190r^5s^4t^2 - 1190r^6s^2t^3 - 1190r^6s^3t^2 - 2113r^7s^2t^2 - 2071r^2s^2t^8 + 2037r^2s^3t^7 + 2037r^2s^4t^6 + 2037r^2s^5t^5 + 2037r^2s^6t^4 + 2037r^2s^7t^3 - 2071r^2s^8t^2 + 2037r^3s^2t^7 - 3150r^3s^3t^6 - 3150r^3s^4t^5 - 3150r^3s^5t^4 - 3150r^3s^6t^3 + 2037r^3s^7t^2 + 2037r^4s^2t^6 - 3150r^4s^3t^5 - 3150r^4s^4t^4 - 3150r^4s^5t^3 + 2037r^4s^6t^2 + 2037r^5s^2t^5 - 3150r^5s^3t^4 - 3150r^5s^4t^3 + 2037r^5s^5t^2 + 2037r^6s^2t^4 - 3150r^6s^3t^3 + 2037r^6s^4t^2 + 2037r^7s^2t^3 + 2037r^7s^3t^2 - 2071r^8s^2t^2 + 590r^2s^2t^9 - 294r^2s^3t^8 - 294r^2s^4t^7 - 294r^2s^5t^6 - 294r^2s^6t^5 - 294r^2s^7t^4 - 294r^2s^8t^3 + 590r^2s^9t^2 - 294r^3s^2t^8 + 252r^3s^3t^7 + 252r^3s^4t^6 + 252r^3s^5t^5 + 252r^3s^6t^4 + 252r^3s^7t^3 - 294r^3s^8t^2 - 294r^4s^2t^7 + 252r^4s^3t^6 + 252r^4s^4t^5 + 252r^4s^5t^4 + 252r^4s^6t^3 - 294r^4s^7t^2 - 294r^5s^2t^6 + 252r^5s^3t^5 + 252r^5s^4t^4 + 252r^5s^5t^3 - 294r^5s^6t^2 - 294r^6s^2t^5 + 252r^6s^3t^4 + 252r^6s^4t^3 - 294r^6s^5t^2 - 294r^7s^2t^4 + 252r^7s^3t^3 - 294r^7s^4t^2 - 294r^8s^2t^3 - 294r^8s^3t^2 + 590r^9s^2t^2))\\/(2162160(r - 1)^3(s - 1)^3(t - 1)^3) - ((x - x_n)^{11}(10rs^2 - 9s - 9t - 8r^2s^2 - 8r^2t^2 - 8s^2t^2 - 2rs - 2rt - 2st - 9r + 10r^2s - 2rs^3 - 2r^3s + 10rt^2 + 10r^2t - 2rt^3 - 2r^3t + 10st^2 + 10s^2t - 2st^3 - 2s^3t + 3r^2 + 3r^3 + 3s^2 + 3s^3 + 3t^2 + 3t^3 - 15rst^2 - 15rs^2t - 15r^2st + rst^3 + rs^3t + r^3st + 4rs^2t^2 + 4r^2st^2 + 4r^2s^2t + 21rst))/(3960h^7(r - 1)^3(s - 1)^3(t - 1)^3) + (h^2(x - x_n)^2(1755r^2s^8 - 819r^3s^7 - 819r^4s^6 - 819r^5s^5 - 819r^6s^4 - 819r^7s^3 + 1755r^8s^2 - 1670r^2s^9 - 448r^3s^8 + 1554r^4s^7 + 1554r^5s^6 + 1554r^6s^5 + 1554r^7s^4 - 448r^8s^3 - 1670r^9s^2 + 35r^2s^{10} + 1335r^3s^9 - 875r^4s^8 - 875r^5s^7 - 875r^6s^6 - 875r^7s^5 - 875r^8s^4 + 1335r^9s^3 + 35r^{10}s^2 + 140r^2s^{11} - 380r^3s^{10} + 140r^4s^9 + 140r^5s^8 + 140r^6s^7 + 140r^7s^6 + 140r^8s^5 + 140r^9s^4 - 380r^{10}s^3 + 140r^{11}s^2 + 1755r^2t^8 - 819r^3t^7 - 819r^4t^6 - 819r^5t^5 - 819r^6t^4 - 819r^7t^3 + 1755r^8t^2 - 1670r^2t^9 - 448r^3t^8 + 1554r^4t^7 + 1554r^5t^6 + 1554r^6t^5 + 1554r^7t^4 - 448r^8t^3 - 1670r^9t^2 + 35r^2t^{10} + 1335r^3t^9 - 875r^4t^8 - 875r^5t^7 - 875r^6t^6 - 875r^7t^5 - 875r^8t^4 + 1335r^9t^3 + 35r^{10}t^2 + 140r^2t^{11} - 380r^3t^{10} + 140r^4t^9 + 140r^5t^8 + 140r^6t^7 + 140r^7t^6 + 140r^8t^5 + 140r^9t^4 - 380r^{10}t^3 + 140r^{11}t^2 + 1755s^2t^8 - 819s^3t^7 - 819s^4t^6 - 819s^5t^5 - 819s^6t^4 - 819s^7t^3 + 1755s^8t^2 - 1670s^2t^9 - 448s^3t^8 + 1554s^4t^7 + 1554s^5t^6 + 1554s^6t^5 + 1554s^7t^4 - 448s^8t^3 - 1670s^9t^2 + 35s^2t^{10} + 1335s^3t^9 - 875s^4t^8 - 875s^5t^7 - 875s^6t^6 - 875s^7t^5 - 875s^8t^4 + 1335s^9t^3 + 35s^{10}t^2 + 140s^2t^{11} - 380s^3t^{10} + 140s^4t^9 + 140s^5t^8 + 140s^6t^7 + 140s^7t^6 + 140s^8t^5 + 140s^9t^4 - 380s^{10}t^3 + 140s^{11}t^2 - 585rs^9 - 585r^9s + 735rs^{10} + 735r^{10}s - 210rs^{11} - 210r^{11}s - 585rt^9 - 585r^9t + 735rt^{10} + 735r^{10}t - 210rt^{11} - 210r^{11}t - 585st^9 - 585s^9t + 735st^{10} + 735s^{10}t - 210st^{11} - 210s^{11}t + 3510rst^8 + 3510rs^8t + 3510r^8st - 3340rst^9 - 3340rs^9t - 3340r^9st + 70rst^{10} + 70rs^{10}t + 70r^{10}st + 280rst^{11} + 280rs^{11}t + 280r^{11}st - 7020rs^2t^7 + 3276rs^3t^6 + 3276rs^4t^5 + 3276rs^5t^4 + 3276rs^6t^3 - 7020rs^7t^2 - 7020r^2st^7 - 7020r^2s^7t + 3276r^3st^6 + 3276r^3s^6t + 3276r^4st^5 + 3276r^4s^5t + 3276r^5st^4 + 3276r^5s^4t + 3276r^6st^3 + 3276r^6s^3t - 7020r^7st^2 - 7020r^7s^2t + 4005rs^2t^8 + 2653rs^3t^7 - 5355rs^4t^6 - 5355rs^5t^5 - 5355rs^6t^4 + 2653rs^7t^3 + 4005rs^8t^2 + 4005r^2st^8 + 4005r^2s^8t + 2653r^3st^7 + 2653r^3s^7t - 5355r^4st^6 - 5355r^4s^6t - 5355r^5st^5 - 5355r^5s^5t - 5355r^6st^4 - 5355r^6s^4t + 2653r^7st^3 + 2653r^7s^3t + 4005r^8st^2 + 4005r^8s^2t + 2330
    rs^2t^9 - 4898rs^3t^8 + 2044rs^4t^7 + 2044rs^5t^6 + 2044rs^6t^5 + 2044rs^7t^4 - 4898rs^8t^3 + 2330rs^9t^2 + 2330 r^2st^9 + 2330r^2s^9t - 4898r^3st^8 - 4898r^3s^8t + 2044r^4st^7 + 2044r^4s^7t + 2044r^5st^6 + 2044r^5s^6t + 2044 r^6st^5 + 2044r^6s^5t + 2044r^7st^4 + 2044r^7s^4t - 4898r^8st^3 - 4898r^8s^3t + 2330r^9st^2 + 2330r^9s^2t - 805r s^2t^{10} + 495rs^3t^9 + 105rs^4t^8 + 105rs^5t^7 + 105rs^6t^6 + 105rs^7t^5 + 105rs^8t^4 + 495rs^9t^3 - 805rs^{10}t^2 -  805r^2st^{10} - 805r^2s^{10}t + 495r^3st^9 + 495r^3s^9t + 105r^4st^8 + 105r^4s^8t + 105r^5st^7 + 105r^5s^7t + 105r^6s t^6 + 105r^6s^6t + 105r^7st^5 + 105r^7s^5t + 105r^8st^4 + 105r^8s^4t + 495r^9st^3 + 495r^9s^3t - 805r^{10}st^2 - 805 r^{10}s^2t - 70rs^2t^{11} + 190rs^3t^{10} - 70rs^4t^9 - 70rs^5t^8 - 70rs^6t^7 - 70rs^7t^6 - 70rs^8t^5 - 70rs^9t^4 + 190rs^{10} t^3 - 70rs^{11}t^2 - 70r^2st^{11} - 70r^2s^{11}t + 190r^3st^{10} + 190r^3s^{10}t - 70r^4st^9 - 70r^4s^9t - 70r^5st^8 - 70r^5s^8t  - 70r^6st^7 - 70r^6s^7t - 70r^7st^6 - 70r^7s^6t - 70r^8st^5 - 70r^8s^5t - 70r^9st^4 - 70r^9s^4t + 190r^{10}st^3 + 190r^{10} s^3t - 70r^{11}st^2 - 70r^{11}s^2t + 8190r^2s^2t^6 - 819r^2s^3t^5 - 819r^2s^4t^4 - 819r^2s^5t^3 + 8190r^2s^6t^2 - 819r^3s^2 t^5 - 9828r^3s^3t^4 - 9828r^3s^4t^3 - 819r^3s^5t^2 - 819r^4s^2t^4 - 9828r^4s^3t^3 - 819r^4s^4t^2 - 819r^5s^2t^3 - 819r^5 s^3t^2 + 8190r^6s^2t^2 + 2198r^2s^2t^7 - 8449r^2s^3t^6 - 1442r^2s^4t^5 - 1442r^2s^5t^4 - 8449r^2s^6t^3 + 2198r^2s^7t^2  - 8449r^3s^2t^6 + 10934r^3s^3t^5 + 17941r^3s^4t^4 + 10934r^3s^5t^3 - 8449r^3s^6t^2 - 1442r^4s^2t^5 + 17941r^4s^3t^4 +  17941r^4s^4t^3 - 1442r^4s^5t^2 - 1442r^5s^2t^4 + 10934r^5s^3t^3 - 1442r^5s^4t^2 - 8449r^6s^2t^3 - 8449r^6s^3t^2 + 2198 r^7s^2t^2 - 8046r^2s^2t^8 + 5032r^2s^3t^7 + 4109r^2s^4t^6 + 4109r^2s^5t^5 + 4109r^2s^6t^4 + 5032r^2s^7t^3 - 8046r^2s^8t^2  + 5032r^3s^2t^7 + 2380r^3s^3t^6 - 9268r^3s^4t^5 - 9268r^3s^5t^4 + 2380r^3s^6t^3 + 5032r^3s^7t^2 + 4109r^4s^2t^6 - 9268 r^4s^3t^5 - 20916r^4s^4t^4 - 9268r^4s^5t^3 + 4109r^4s^6t^2 + 4109r^5s^2t^5 - 9268r^5s^3t^4 - 9268r^5s^4t^3 + 4109r^5s^5t^2  + 4109r^6s^2t^4 + 2380r^6s^3t^3 + 4109r^6s^4t^2 + 5032r^7s^2t^3 + 5032r^7s^3t^2 - 8046r^8s^2t^2 + 710r^2s^2t^9 + 2036r^2 s^3t^8 - 2072r^2s^4t^7 - 2072r^2s^5t^6 - 2072r^2s^6t^5 - 2072r^2s^7t^4 + 2036r^2s^8t^3 + 710r^2s^9t^2 + 2036r^3s^2t^8 -  4074r^3s^3t^7 + 1113r^3s^4t^6 + 1113r^3s^5t^5 + 1113r^3s^6t^4 - 4074r^3s^7t^3 + 2036r^3s^8t^2 - 2072r^4s^2t^7 + 1113r^4 s^3t^6 + 6300r^4s^4t^5 + 6300r^4s^5t^4 + 1113r^4s^6t^3 - 2072r^4s^7t^2 - 2072r^5s^2t^6 + 1113r^5s^3t^5 + 6300r^5s^4t^4 +  1113r^5s^5t^3 - 2072r^5s^6t^2 - 2072r^6s^2t^5 + 1113r^6s^3t^4 + 1113r^6s^4t^3 - 2072r^6s^5t^2 - 2072r^7s^2t^4 - 4074r^7 s^3t^3 - 2072r^7s^4t^2 + 2036r^8s^2t^3 + 2036r^8s^3t^2 + 710r^9s^2t^2 + 380r^2s^2t^{10} - 660r^2s^3t^9 + 224r^2s^4t^8 + 224 r^2s^5t^7 + 224r^2s^6t^6 + 224r^2s^7t^5 + 224r^2s^8t^4 - 660r^2s^9t^3 + 380r^2s^{10}t^2 - 660r^3s^2t^9 + 588r^3s^3t^8 + 42r^3 s^4t^7 + 42r^3s^5t^6 + 42r^3s^6t^5 + 42r^3s^7t^4 + 588r^3s^8t^3 - 660r^3s^9t^2 + 224r^4s^2t^8 + 42r^4s^3t^7 - 504r^4s^4t^6 -  504r^4s^5t^5 - 504r^4s^6t^4 + 42r^4s^7t^3 + 224r^4s^8t^2 + 224r^5s^2t^7 + 42r^5s^3t^6 - 504r^5s^4t^5 - 504r^5s^5t^4 + 42r^5 s^6t^3 + 224r^5s^7t^2 + 224r^6s^2t^6 + 42r^6s^3t^5 - 504r^6s^4t^4 + 42r^6s^5t^3 + 224r^6s^6t^2 + 224r^7s^2t^5 + 42r^7s^3t^4  + 42r^7s^4t^3 + 224r^7s^5t^2 + 224r^8s^2t^4 + 588r^8s^3t^3 + 224r^8s^4t^2 - 660r^9s^2t^3 - 660r^9s^3t^2 + 380r^{10}s^2t^2))\\/(2162160(r - 1)^3(s - 1)^3(t - 1)^3) - ((x - x_n)^{13}(3r + 3s + 3t - 2rs - 2rt - 2st + rst - 4))/(8580h^9(r  - 1)^3(s - 1)^3(t - 1)^3) + ((x - x_n)^9(2r^2s^3 - 10r^2s^2 + 2r^3s^2 + 2r^3s^3 - 10r^2t^2 + 2r^2t^3 + 2r^3t^2 + 2r^3t^3  - 10s^2t^2 + 2s^2t^3 + 2s^3t^2 + 2s^3t^3 + 9rs^2 + 9r^2s - 7rs^3 - 7r^3s + 9rt^2 + 9r^2t - 7rt^3 - 7r^3t + 9st^2 + 9 s^2t - 7st^3 - 7s^3t - 26rst^2 - 26rs^2t - 26r^2st - 2rst^3 - 2rs^3t - 2r^3st + 3rs^2t^2 + 3r^2st^2 + 3r^2s^2t + 7 rs^2t^3 + 7rs^3t^2 + 7r^2st^3 + 7r^2s^3t + 7r^3st^2 + 7r^3s^2t - rs^3t^3 - r^3st^3 - r^3s^3t + 36rst + 12r^2s^2t^2 - 4r^2 s^2t^3 - 4r^2s^3t^2 - 4r^3s^2t^2))/(1512h^5(r - 1)^3(s - 1)^3(t - 1)^3) + ((x - x_n)^{10}(4r^2s^2 - 8r^2s^3 - 8r^3s^2 +  4r^2t^2 - 8r^2t^3 - 8r^3t^2 + 4s^2t^2 - 8s^2t^3 - 8s^3t^2 - 36rs - 36rt - 36st + 19rs^2 + 19r^2s + 7rs^3 + 7r^3s +  19rt^2 + 19r^2t + 7rt^3 + 7r^3t + 19st^2 + 19s^2t + 7st^3 + 7s^3t - 9r^2 + 7r^3 - 9s^2 + 7s^3 - 9t^2 + 7t^3 + 27r st^2 + 27rs^2t + 27r^2st - 13rst^3 - 13rs^3t - 13r^3st - 36rs^2t^2 - 36r^2st^2 - 36r^2s^2t + 4rs^2t^3 + 4rs^3t^2 +  4r^2st^3 + 4r^2s^3t + 4r^3st^2 + 4r^3s^2t + 20rst + 16r^2s^2t^2))/(5040h^6(r - 1)^3(s - 1)^3(t - 1)^3) - ((x - x_n)^8 (9r^2s^2 - 7r^2s^3 - 7r^3s^2 + 5r^3s^3 + 9r^2t^2 - 7r^2t^3 - 7r^3t^2 + 5r^3t^3 + 9s^2t^2 - 7s^2t^3 - 7s^3t^2 + 5s^3t^3 + 36 rst^2 + 36rs^2t + 36r^2st - 28rst^3 - 28rs^3t - 28r^3st - 47rs^2t^2 - 47r^2st^2 - 47r^2s^2t + 13rs^2t^3 + 13rs^3t^2  + 13r^2st^3 + 13r^2s^3t + 13r^3st^2 + 13r^3s^2t + 5rs^3t^3 + 5r^3st^3 + 5r^3s^3t + 24r^2s^2t^2 + 4r^2s^2t^3 + 4r^2s^3t^2 +  4r^3s^2t^2 - 4r^2s^3t^3 - 4r^3s^2t^3 - 4r^3s^3t^2))/(1680h^4(r - 1)^3(s - 1)^3(t - 1)^3) - ((x - x_n)^{12}(9r + 9s + 9t  - 19rs - 19rt - 19st + 8rs^2 + 8r^2s + 8rt^2 + 8r^2t + 8st^2 + 8s^2t - 12r^2 - 12s^2 - 12t^2 - 4rst^2 - 4rs^2t  - 4r^2st + 21rst + 9))/(11880h^8(r - 1)^3(s - 1)^3(t - 1)^3) + (h^3rst(x - x_n)(819r^2s^6 + 819r^3s^5 + 819r^4 s^4 + 819r^5s^3 + 819r^6s^2 + 448r^2s^7 - 1554r^3s^6 - 1554r^4s^5 - 1554r^5s^4 - 1554r^6s^3 + 448r^7s^2 - 1335r^2 s^8 + 875r^3s^7 + 875r^4s^6 + 875r^5s^5 + 875r^6s^4 + 875r^7s^3 - 1335r^8s^2 + 380r^2s^9 - 140r^3s^8 - 140r^4s^7 -  140r^5s^6 - 140r^6s^5 - 140r^7s^4 - 140r^8s^3 + 380r^9s^2 + 819r^2t^6 + 819r^3t^5 + 819r^4t^4 + 819r^5t^3 + 819r^6t^2  + 448r^2t^7 - 1554r^3t^6 - 1554r^4t^5 - 1554r^5t^4 - 1554r^6t^3 + 448r^7t^2 - 1335r^2t^8 + 875r^3t^7 + 875r^4t^6 +  875r^5t^5 + 875r^6t^4 + 875r^7t^3 - 1335r^8t^2 + 380r^2t^9 - 140r^3t^8 - 140r^4t^7 - 140r^5t^6 - 140r^6t^5 - 140r^7t^4 
    - 140r^8t^3 + 380r^9t^2 + 819s^2t^6 + 819s^3t^5 + 819s^4t^4 + 819s^5t^3 + 819s^6t^2 + 448s^2t^7 - 1554s^3t^6 - 1554s^4t^5 - 1554s^5t^4 - 1554s^6t^3 + 448s^7t^2 - 1335s^2t^8 + 875s^3t^7 + 875s^4t^6 + 875s^5t^5 + 875s^6t^4 + 875s^7t^3 - 1335s^8t^2 + 380s^2t^9 - 140s^3t^8 - 140s^4t^7 - 140s^5t^6 - 140s^6t^5 - 140s^7t^4 - 140s^8t^3 + 380s^9t^2 - 1755rs^7 - 1755r^7s + 1670rs^8 + 1670r^8s - 35rs^9 - 35r^9s - 140rs^{10} - 140r^{10}s - 1755rt^7 - 1755r^7t + 1670rt^8 + 1670r^8t - 35rt^9 - 35r^9t - 140rt^{10} - 140r^{10}t - 1755st^7 - 1755s^7t + 1670st^8 + 1670s^8t - 35st^9 - 35s^9t - 140st^{10} - 140s^{10}t + 585r^8 - 735r^9 + 210r^{10} + 585s^8 - 735s^9 + 210s^{10} + 585t^8 - 735t^9 + 210t^{10} + 6201rst^6 + 6201rs^6t + 6201r^6st - 4453rst^7 - 4453rs^7t - 4453r^7st - 995rst^8 - 995rs^8t - 995r^8st + 425rst^9 + 425rs^9t + 425r^9st + 70rst^{10} + 70rs^{10}t + 70r^{10}st - 4095rs^2t^5 - 4095rs^3t^4 - 4095rs^4t^3 - 4095rs^5t^2 - 4095r^2st^5 - 4095r^2s^5t - 4095r^3st^4 - 4095r^3s^4t - 4095r^4st^3 - 4095r^4s^3t - 4095r^5st^2 - 4095r^5s^2t - 1099rs^2t^6 + 6909rs^3t^5 + 6909rs^4t^4 + 6909rs^5t^3 - 1099rs^6t^2 - 1099r^2st^6 - 1099r^2s^6t + 6909r^3st^5 + 6909r^3s^5t + 6909r^4st^4 + 6909r^4s^4t + 6909r^5st^3 + 6909r^5s^3t - 1099r^6st^2 - 1099r^6s^2t + 4023rs^2t^7 - 2919rs^3t^6 - 2919rs^4t^5 - 2919rs^5t^4 - 2919rs^6t^3 + 4023rs^7t^2 + 4023r^2st^7 + 4023r^2s^7t - 2919r^3st^6 - 2919r^3s^6t - 2919r^4st^5 - 2919r^4s^5t - 2919r^5st^4 - 2919r^5s^4t - 2919r^6st^3 - 2919r^6s^3t + 4023r^7st^2 + 4023r^7s^2t - 355rs^2t^8 + 35rs^3t^7 + 35rs^4t^6 + 35rs^5t^5 + 35rs^6t^4 + 35rs^7t^3 - 355rs^8t^2 - 355r^2st^8 - 355r^2s^8t + 35r^3st^7 + 35r^3s^7t + 35r^4st^6 + 35r^4s^6t + 35r^5st^5 + 35r^5s^5t + 35r^6st^4 + 35r^6s^4t + 35r^7st^3 + 35r^7s^3t - 355r^8st^2 - 355r^8s^2t - 190rs^2t^9 + 70rs^3t^8 + 70rs^4t^7 + 70rs^5t^6 + 70rs^6t^5 + 70rs^7t^4 + 70rs^8t^3 - 190rs^9t^2 - 190r^2st^9 - 190r^2s^9t + 70r^3st^8 + 70r^3s^8t + 70r^4st^7 + 70r^4s^7t + 70r^5st^6 + 70r^5s^6t + 70r^6st^5 + 70r^6s^5t + 70r^7st^4 + 70r^7s^4t + 70r^8st^3 + 70r^8s^3t - 190r^9st^2 - 190r^9s^2t + 4914r^2s^2t^4 + 4914r^2s^3t^3 + 4914r^2s^4t^2 + 4914r^3s^2t^3 + 4914r^3s^3t^2 + 4914r^4s^2t^2 + 1540r^2s^2t^5 - 5467r^2s^3t^4 - 5467r^2s^4t^3 + 1540r^2s^5t^2 - 5467r^3s^2t^4 - 12474r^3s^3t^3 - 5467r^3s^4t^2 - 5467r^4s^2t^3 - 5467r^4s^3t^2 + 1540r^5s^2t^2 - 2113r^2s^2t^6 - 1190r^2s^3t^5 - 1190r^2s^4t^4 - 1190r^2s^5t^3 - 2113r^2s^6t^2 - 1190r^3s^2t^5 + 10458r^3s^3t^4 + 10458r^3s^4t^3 - 1190r^3s^5t^2 - 1190r^4s^2t^4 + 10458r^4s^3t^3 - 1190r^4s^4t^2 - 1190r^5s^2t^3 - 1190r^5s^3t^2 - 2113r^6s^2t^2 - 2071r^2s^2t^7 + 2037r^2s^3t^6 + 2037r^2s^4t^5 + 2037r^2s^5t^4 + 2037r^2s^6t^3 - 2071r^2s^7t^2 + 2037r^3s^2t^6 - 3150r^3s^3t^5 - 3150r^3s^4t^4 - 3150r^3s^5t^3 + 2037r^3s^6t^2 + 2037r^4s^2t^5 - 3150r^4s^3t^4 - 3150r^4s^4t^3 + 2037r^4s^5t^2 + 2037r^5s^2t^4 - 3150r^5s^3t^3 + 2037r^5s^4t^2 + 2037r^6s^2t^3 + 2037r^6s^3t^2 - 2071r^7s^2t^2 + 590r^2s^2t^8 - 294r^2s^3t^7 - 294r^2s^4t^6 - 294r^2s^5t^5 - 294r^2s^6t^4 - 294r^2s^7t^3 + 590r^2s^8t^2 - 294r^3s^2t^7 + 252r^3s^3t^6 + 252r^3s^4t^5 + 252r^3s^5t^4 + 252r^3s^6t^3 - 294r^3s^7t^2 - 294r^4s^2t^6 + 252r^4s^3t^5 + 252r^4s^4t^4 + 252r^4s^5t^3 - 294r^4s^6t^2 - 294r^5s^2t^5 + 252r^5s^3t^4 + 252r^5s^4t^3 - 294r^5s^5t^2 - 294r^6s^2t^4 + 252r^6s^3t^3 - 294r^6s^4t^2 - 294r^7s^2t^3 - 294r^7s^3t^2 + 590r^8s^2t^2))/(2162160(r - 1)^3(s - 1)^3(t - 1)^3) - (rst(x - x_n)^7(7rs^2 - 5r^2t^2 - 5s^2t^2 - 9rs - 9rt - 9st - 5r^2s^2 + 7r^2s + 7rt^2 + 7r^2t + 7st^2 + 7s^2t - 7rst^2 - 7rs^2t - 7r^2st + rs^2t^2 + r^2st^2 + r^2s^2t + 17rst + r^2s^2t^2))/(420h^3(r - 1)^3(s - 1)^3(t - 1)^3) + (r^2s^2t^2(x - x_n)^6(7r + 7s + 7t - 5rs - 5rt - 5st + 3rst - 9))/(360h^2(r - 1)^3(s - 1)^3(t - 1)^3),\\\\
    \gamma_0 =(x - x_n)^5/120 + (x - x_n)^{13}/(17160h^8r^2s^2t^2) - (h^2(x - x_n)^3(35r^{10} - 95r^9s - 95r^9t - 130r^9 + 35r^8s^2 + 295r^8st + 390r^8s + 35r^8t^2 + 390r^8t + 130r^8 + 35r^7s^3 - 147r^7s^2t - 182r^7s^2 - 147r^7st^2 - 1378r^7st - 442r^7s + 35r^7t^3 - 182r^7t^2 - 442r^7t + 35r^6s^4 - 147r^6s^3t - 182r^6s^3 + 126r^6s^2t^2 + 910r^6s^2t + 273r^6s^2 - 147r^6st^3 + 910r^6st^2 + 1846r^6st + 35r^6t^4 - 182r^6t^3 + 273r^6t^2 + 35r^5s^5 - 147r^5s^4t - 182r^5s^4 + 126r^5s^3t^2 + 910r^5s^3t + 273r^5s^3 + 126r^5s^2t^3 - 1092r^5s^2t^2 - 1729r^5s^2t - 147r^5st^4 + 910r^5st^3 - 1729r^5st^2 + 35r^5t^5 - 182r^5t^4 + 273r^5t^3 + 35r^4s^6 - 147r^4s^5t - 182r^4s^5 + 126r^4s^4t^2 + 910r^4s^4t + 273r^4s^4 + 126r^4s^3t^3 - 1092r^4s^3t^2 - 1729r^4s^3t + 126r^4s^2t^4 - 1092r^4s^2t^3 + 3276r^4s^2t^2 - 147r^4st^5 + 910r^4st^4 - 1729r^4st^3 + 35r^4t^6 - 182r^4t^5 + 273r^4t^4 + 35r^3s^7 - 147r^3s^6t - 182r^3s^6 + 126r^3s^5t^2 + 910r^3s^5t + 273r^3s^5 + 126r^3s^4t^3 - 1092r^3s^4t^2 - 1729r^3s^4t + 126r^3s^3t^4 - 1092r^3s^3t^3 + 3276r^3s^3t^2 + 126r^3s^2t^5 - 1092r^3s^2t^4 + 3276r^3s^2t^3 - 147r^3st^6 + 910r^3st^5 - 1729r^3st^4 + 35r^3t^7 - 182r^3t^6 + 273r^3t^5 + 35r^2s^8 - 147r^2s^7t - 182r^2s^7 + 126r^2s^6t^2 + 910r^2s^6t + 273r^2s^6 + 126r^2s^5t^3 - 1092r^2s^5t^2 - 1729r^2s^5t + 126r^2s^4t^4 - 1092r^2s^4t^3 + 3276r^2s^4t^2 + 126r^2s^3t^5 - 1092r^2s^3t^4 + 3276r^2s^3t^3 + 126r^2s^2t^6 - 1092r^2s^2t^5 + 3276r^2s^2t^4 - 147r^2st^7 + 910r^2st^6 - 1729r^2st^5 + 35r^2t^8 - 182r^2t^7 + 273r^2t^6 - 95rs^9 + 295rs^8t + 390rs^8 - 147rs^7t^2 - 1378rs^7t - 442rs^7 - 147rs^6t^3 + 910rs^6t^2 + 1846rs^6t - 147rs^5t^4 + 910rs^5t^3 - 1729rs^5t^2 - 147rs^4t^5 + 910rs^4t^4 - 1729rs^4t^3 - 147rs^3t^6 + 910rs^3t^5 - 1729rs^3t^4 - 147rs^2t^7 + 910rs^2t^6 - 1729rs^2t^5 + 295rst^8 - 1378rst^7 + 1846rst^6 - 95rt^9 + 390rt^8 - 442rt^7 + 35s^{10} - 95s^9t - 130s^9 + 35s^8t^2 + 390s^8t + 130s^8 + 35s^7t^3 - 182s^7t^2 - 442s^7t + 35s^6t^4 - 182s^6t^3 + 273s^6t^2 + 35s^5t^5 - 182s^5t^4 + 273s^5t^3 + 35s^4t^6 - 182s^4t^5 + 273
    s^4t^4 + 35s^3t^7 - 182s^3t^6 + 273s^3t^5 + 35s^2t^8 - 182s^2t^7 + 273s^2t^6 - 95st^9 + 390st^8 - 442st^7 + 35t^{10} - 130t^9 + 130t^8))/(2162160r^2s^2t^2) + ((x - x_n)^9(r^2s^2 + 4r^2st + 4r^2s + r^2t^2 + 4r^2t + r^2 + 4rs^2t + 4rs^2 + 4rst^2 + 16rst + 4rs + 4rt^2 + 4rt + s^2t^2 + 4s^2t + s^2 + 4st^2 + 4st + t^2))/(3024h^4r^2s^2t^2) - ((x - x_n)^{10}(r^2s + r^2t + r^2 + rs^2 + 4rst + 4rs + rt^2 + 4rt + r + s^2t + s^2 + st^2 + 4st + s + t^2 + t))/(2520h^5r^2s^2t^2) - (h^3(x - x_n)^2(95r^9s^2 - 35r^{10}t - 35r^{10}s + 190r^9st + 130r^9s + 95r^9t^2 + 130r^9t - 35r^8s^3 - 330r^8s^2t - 390r^8s^2 - 330r^8st^2 - 780r^8st - 130r^8s - 35r^8t^3 - 390r^8t^2 - 130r^8t - 35r^7s^4 + 112r^7s^3t + 182r^7s^3 + 294r^7s^2t^2 + 1560r^7s^2t + 442r^7s^2 + 112r^7st^3 + 1560r^7st^2 + 884r^7st - 35r^7t^4 + 182r^7t^3 + 442r^7t^2 - 35r^6s^5 + 112r^6s^4t + 182r^6s^4 + 21r^6s^3t^2 - 728r^6s^3t - 273r^6s^3 + 21r^6s^2t^3 - 1820r^6s^2t^2 - 2119r^6s^2t + 112r^6st^4 - 728r^6st^3 - 2119r^6st^2 - 35r^6t^5 + 182r^6t^4 - 273r^6t^3 - 35r^5s^6 + 112r^5s^5t + 182r^5s^5 + 21r^5s^4t^2 - 728r^5s^4t - 273r^5s^4 - 252r^5s^3t^3 + 182r^5s^3t^2 + 1456r^5s^3t + 21r^5s^2t^4 + 182r^5s^2t^3 + 3458r^5s^2t^2 + 112r^5st^5 - 728r^5st^4 + 1456r^5st^3 - 35r^5t^6 + 182r^5t^5 - 273r^5t^4 - 35r^4s^7 + 112r^4s^6t + 182r^4s^6 + 21r^4s^5t^2 - 728r^4s^5t - 273r^4s^5 - 252r^4s^4t^3 + 182r^4s^4t^2 + 1456r^4s^4t - 252r^4s^3t^4 + 2184r^4s^3t^3 - 1547r^4s^3t^2 + 21r^4s^2t^5 + 182r^4s^2t^4 - 1547r^4s^2t^3 + 112r^4st^6 - 728r^4st^5 + 1456r^4st^4 - 35r^4t^7 + 182r^4t^6 - 273r^4t^5 - 35r^3s^8 + 112r^3s^7t + 182r^3s^7 + 21r^3s^6t^2 - 728r^3s^6t - 273r^3s^6 - 252r^3s^5t^3 + 182r^3s^5t^2 + 1456r^3s^5t - 252r^3s^4t^4 + 2184r^3s^4t^3 - 1547r^3s^4t^2 - 252r^3s^3t^5 + 2184r^3s^3t^4 - 6552r^3s^3t^3 + 21r^3s^2t^6 + 182r^3s^2t^5 - 1547r^3s^2t^4 + 112r^3st^7 - 728r^3st^6 + 1456r^3st^5 - 35r^3t^8 + 182r^3t^7 - 273r^3t^6 + 95r^2s^9 - 330r^2s^8t - 390r^2s^8 + 294r^2s^7t^2 + 1560r^2s^7t + 442r^2s^7 + 21r^2s^6t^3 - 1820r^2s^6t^2 - 2119r^2s^6t + 21r^2s^5t^4 + 182r^2s^5t^3 + 3458r^2s^5t^2 + 21r^2s^4t^5 + 182r^2s^4t^4 - 1547r^2s^4t^3 + 21r^2s^3t^6 + 182r^2s^3t^5 - 1547r^2s^3t^4 + 294r^2s^2t^7 - 1820r^2s^2t^6 + 3458r^2s^2t^5 - 330r^2st^8 + 1560r^2st^7 - 2119r^2st^6 + 95r^2t^9 - 390r^2t^8 + 442r^2t^7 - 35rs^{10} + 190rs^9t + 130rs^9 - 330rs^8t^2 - 780rs^8t - 130rs^8 + 112rs^7t^3 + 1560rs^7t^2 + 884rs^7t + 112rs^6t^4 - 728rs^6t^3 - 2119rs^6t^2 + 112rs^5t^5 - 728rs^5t^4 + 1456rs^5t^3 + 112rs^4t^6 - 728rs^4t^5 + 1456rs^4t^4 + 112rs^3t^7 - 728rs^3t^6 + 1456rs^3t^5 - 330rs^2t^8 + 1560rs^2t^7 - 2119rs^2t^6 + 190rst^9 - 780rst^8 + 884rst^7 - 35rt^{10} + 130rt^9 - 130rt^8 - 35s^{10}t + 95s^9t^2 + 130s^9t - 35s^8t^3 - 390s^8t^2 - 130s^8t - 35s^7t^4 + 182s^7t^3 + 442s^7t^2 - 35s^6t^5 + 182s^6t^4 - 273s^6t^3 - 35s^5t^6 + 182s^5t^5 - 273s^5t^4 - 35s^4t^7 + 182s^4t^6 - 273s^4t^5 - 35s^3t^8 + 182s^3t^7 - 273s^3t^6 + 95s^2t^9 - 390s^2t^8 + 442s^2t^7 - 35st^{10} + 130st^9 - 130st^8))/(2162160r^2s^2t^2) - (h^4(x - x_n)(35r^9 - 95r^8s - 95r^8t - 130r^8 + 35r^7s^2 + 295r^7st + 390r^7s + 35r^7t^2 + 390r^7t + 130r^7 + 35r^6s^3 - 147r^6s^2t - 182r^6s^2 - 147r^6st^2 - 1378r^6st - 442r^6s + 35r^6t^3 - 182r^6t^2 - 442r^6t + 35r^5s^4 - 147r^5s^3t - 182r^5s^3 + 126r^5s^2t^2 + 910r^5s^2t + 273r^5s^2 - 147r^5st^3 + 910r^5st^2 + 1846r^5st + 35r^5t^4 - 182r^5t^3 + 273r^5t^2 + 35r^4s^5 - 147r^4s^4t - 182r^4s^4 + 126r^4s^3t^2 + 910r^4s^3t + 273r^4s^3 + 126r^4s^2t^3 - 1092r^4s^2t^2 - 1729r^4s^2t - 147r^4st^4 + 910r^4st^3 - 1729r^4st^2 + 35r^4t^5 - 182r^4t^4 + 273r^4t^3 + 35r^3s^6 - 147r^3s^5t - 182r^3s^5 + 126r^3s^4t^2 + 910r^3s^4t + 273r^3s^4 + 126r^3s^3t^3 - 1092r^3s^3t^2 - 1729r^3s^3t + 126r^3s^2t^4 - 1092r^3s^2t^3 + 3276r^3s^2t^2 - 147r^3st^5 + 910r^3st^4 - 1729r^3st^3 + 35r^3t^6 - 182r^3t^5 + 273r^3t^4 + 35r^2s^7 - 147r^2s^6t - 182r^2s^6 + 126r^2s^5t^2 + 910r^2s^5t + 273r^2s^5 + 126r^2s^4t^3 - 1092r^2s^4t^2 - 1729r^2s^4t + 126r^2s^3t^4 - 1092r^2s^3t^3 + 3276r^2s^3t^2 + 126r^2s^2t^5 - 1092r^2s^2t^4 + 3276r^2s^2t^3 - 147r^2st^6 + 910r^2st^5 - 1729r^2st^4 + 35r^2t^7 - 182r^2t^6 + 273r^2t^5 - 95rs^8 + 295rs^7t + 390rs^7 - 147rs^6t^2 - 1378rs^6t - 442rs^6 - 147rs^5t^3 + 910rs^5t^2 + 1846rs^5t - 147rs^4t^4 + 910rs^4t^3 - 1729rs^4t^2 - 147rs^3t^5 + 910rs^3t^4 - 1729rs^3t^3 - 147rs^2t^6 + 910rs^2t^5 - 1729rs^2t^4 + 295rst^7 - 1378rst^6 + 1846rst^5 - 95rt^8 + 390rt^7 - 442rt^6 + 35s^9 - 95s^8t - 130s^8 + 35s^7t^2 + 390s^7t + 130s^7 + 35s^6t^3 - 182s^6t^2 - 442s^6t + 35s^5t^4 - 182s^5t^3 + 273s^5t^2 + 35s^4t^5 - 182s^4t^4 + 273s^4t^3 + 35s^3t^6 - 182s^3t^5 + 273s^3t^4 + 35s^2t^7 - 182s^2t^6 + 273s^2t^5 - 95st^8 + 390st^7 - 442st^6 + 35t^9 - 130t^8 + 130t^7))/(2162160rst) - ((x - x_n)^8(r^2s^2t + r^2s^2 + r^2st^2 + 4r^2st + r^2s + r^2t^2 + r^2t + rs^2t^2 + 4rs^2t + rs^2 + 4rst^2 + 4rst + rt^2 + s^2t^2 + s^2t + st^2))/(840h^3r^2s^2t^2) - ((x - x_n)^{12}(r + s + t + 1))/(5940h^7r^2s^2t^2) - ((x - x_n)^6(rs + rt + st + rst))/(180hrst) + ((x - x_n)^7(r^2s^2t^2 + 4r^2s^2t + r^2s^2 + 4r^2st^2 + 4r^2st + r^2t^2 + 4rs^2t^2 + 4rs^2t + 4rst^2 + s^2t^2))/(840h^2r^2s^2t^2) + ((x - x_n)^{11}(r^2 + 4rs + 4rt + 4r + s^2 + 4st + 4s + t^2 + 4t + 1))/(7920h^6r^2s^2t^2),\\\\
    \gamma_r =(x - x_n)^{13}/(17160h^8r^2(r - s)^2(r - t)^2(r - 1)^2) - ((x - x_n)^{10}(r + 2s + 2t + 4rs + 4rt + 8st + rs^2 + rt^2 + 2st^2 + 2s^2t + 2s^2 + 2t^2 + 4rst))/(5040h^5r^2(r - s)^2(r - t)^2(r - 1)^2) + ((x - x_n)^{11}(2r + 4s + 4t + 2rs + 2rt + 4st + s^2 + t^2 + 1))/(7920h^6r^2(r - s)^2(r - t)^2(r - 1)^2) + ((x - x_n)^9(s^2t^2 + 2rs + 2rt + 4st + 2rs^2 + 2rt^2 + 4st^2 + 4s^2t + s^2 + t^2 + 2rst^2 + 2rs^2t + 8rst))/(3024h^4r^2(r - s)^2(r - t)^2(r - \\
    $
    $
    1)^2) - ((x - x_n)^8(2s^2t^2 + rs^2 + rt^2 + 2st^2 + 2s^2t + 4rst^2 + 4rs^2t + rs^2t^2 + 4rst))/(1680h^3r^2(r - s)^2(r - t)^2(r - 1)^2) + (h^2(x - x_n)^3(56r^{10} - 126r^9s - 126r^9t - 182r^9 + 30r^8s^2 + 316r^8st + 442r^8s + 30r^8t^2 + 442r^8t + 156r^8 + 30r^7s^3 - 100r^7s^2t - 130r^7s^2 - 100r^7st^2 - 1222r^7st - 416r^7s + 30r^7t^3 - 130r^7t^2 - 416r^7t + 30r^6s^4 - 100r^6s^3t - 130r^6s^3 + 56r^6s^2t^2 + 494r^6s^2t + 156r^6s^2 - 100r^6st^3 + 494r^6st^2 + 1300r^6st + 30r^6t^4 - 130r^6t^3 + 156r^6t^2 + 30r^5s^5 - 100r^5s^4t - 130r^5s^4 + 56r^5s^3t^2 + 494r^5s^3t + 156r^5s^3 + 56r^5s^2t^3 - 364r^5s^2t^2 - 702r^5s^2t - 100r^5st^4 + 494r^5st^3 - 702r^5st^2 + 30r^5t^5 - 130r^5t^4 + 156r^5t^3 + 30r^4s^6 - 100r^4s^5t - 130r^4s^5 + 56r^4s^4t^2 + 494r^4s^4t + 156r^4s^4 + 56r^4s^3t^3 - 364r^4s^3t^2 - 702r^4s^3t + 56r^4s^2t^4 - 364r^4s^2t^3 + 728r^4s^2t^2 - 100r^4st^5 + 494r^4st^4 - 702r^4st^3 + 30r^4t^6 - 130r^4t^5 + 156r^4t^4 + 30r^3s^7 - 100r^3s^6t - 130r^3s^6 + 56r^3s^5t^2 + 494r^3s^5t + 156r^3s^5 + 56r^3s^4t^3 - 364r^3s^4t^2 - 702r^3s^4t + 56r^3s^3t^4 - 364r^3s^3t^3 + 728r^3s^3t^2 + 56r^3s^2t^5 - 364r^3s^2t^4 + 728r^3s^2t^3 - 100r^3st^6 + 494r^3st^5 - 702r^3st^4 + 30r^3t^7 - 130r^3t^6 + 156r^3t^5 + 30r^2s^8 - 100r^2s^7t - 130r^2s^7 + 56r^2s^6t^2 + 494r^2s^6t + 156r^2s^6 + 56r^2s^5t^3 - 364r^2s^5t^2 - 702r^2s^5t + 56r^2s^4t^4 - 364r^2s^4t^3 + 728r^2s^4t^2 + 56r^2s^3t^5 - 364r^2s^3t^4 + 728r^2s^3t^3 + 56r^2s^2t^6 - 364r^2s^2t^5 + 728r^2s^2t^4 - 100r^2st^7 + 494r^2st^6 - 702r^2st^5 + 30r^2t^8 - 130r^2t^7 + 156r^2t^6 + 30rs^9 - 100rs^8t - 130rs^8 + 56rs^7t^2 + 494rs^7t + 156rs^7 + 56rs^6t^3 - 364rs^6t^2 - 702rs^6t + 56rs^5t^4 - 364rs^5t^3 + 728rs^5t^2 + 56rs^4t^5 - 364rs^4t^4 + 728rs^4t^3 + 56rs^3t^6 - 364rs^3t^5 + 728rs^3t^4 + 56rs^2t^7 - 364rs^2t^6 + 728rs^2t^5 - 100rst^8 + 494rst^7 - 702rst^6 + 30rt^9 - 130rt^8 + 156rt^7 - 35s^{10} + 95s^9t + 130s^9 - 35s^8t^2 - 390s^8t - 130s^8 - 35s^7t^3 + 182s^7t^2 + 442s^7t - 35s^6t^4 + 182s^6t^3 - 273s^6t^2 - 35s^5t^5 + 182s^5t^4 - 273s^5t^3 - 35s^4t^6 + 182s^4t^5 - 273s^4t^4 - 35s^3t^7 + 182s^3t^6 - 273s^3t^5 - 35s^2t^8 + 182s^2t^7 - 273s^2t^6 + 95st^9 - 390st^8 + 442st^7 - 35t^{10} + 130t^9 - 130t^8))/(2162160r^2(r - s)^2(r - t)^2(r - 1)^2) - ((x - x_n)^{12}(r + 2s + 2t + 2))/(11880h^7r^2(r - s)^2(r - t)^2(r - 1)^2) - (h^3(x - x_n)^2(56r^{10}s + 56r^{10}t - 126r^9s^2 - 252r^9st - 182r^9s - 126r^9t^2 - 182r^9t + 30r^8s^3 + 346r^8s^2t + 442r^8s^2 + 346r^8st^2 + 884r^8st + 156r^8s + 30r^8t^3 + 442r^8t^2 + 156r^8t + 30r^7s^4 - 70r^7s^3t - 130r^7s^3 - 200r^7s^2t^2 - 1352r^7s^2t - 416r^7s^2 - 70r^7st^3 - 1352r^7st^2 - 832r^7st + 30r^7t^4 - 130r^7t^3 - 416r^7t^2 + 30r^6s^5 - 70r^6s^4t - 130r^6s^4 - 44r^6s^3t^2 + 364r^6s^3t + 156r^6s^3 - 44r^6s^2t^3 + 988r^6s^2t^2 + 1456r^6s^2t - 70r^6st^4 + 364r^6st^3 + 1456r^6st^2 + 30r^6t^5 - 130r^6t^4 + 156r^6t^3 + 30r^5s^6 - 70r^5s^5t - 130r^5s^5 - 44r^5s^4t^2+ 364r^5s^4t + 156r^5s^4 + 112r^5s^3t^3 + 130r^5s^3t^2 - 546r^5s^3t - 44r^5s^2t^4 + 130r^5s^2t^3 - 1404r^5s^2t^2 - 70r^5st^5 + 364r^5st^4 - 546r^5st^3 + 30r^5t^6 - 130r^5t^5 + 156r^5t^4 + 30r^4s^7 - 70r^4s^6t - 130r^4s^6 - 44r^4s^5t^2 + 364r^4s^5t + 156r^4s^5 + 112r^4s^4t^3 + 130r^4s^4t^2 - 546r^4s^4t + 112r^4s^3t^4 - 728r^4s^3t^3 + 26r^4s^3t^2 - 44r^4s^2t^5 + 130r^4s^2t^4 + 26r^4s^2t^3 - 70r^4st^6 + 364r^4st^5 - 546r^4st^4 + 30r^4t^7 - 130r^4t^6 + 156r^4t^5 + 30r^3s^8 - 70r^3s^7t - 130r^3s^7 - 44r^3s^6t^2 + 364r^3s^6t + 156r^3s^6 + 112r^3s^5t^3 + 130r^3s^5t^2 - 546r^3s^5t + 112r^3s^4t^4 - 728r^3s^4t^3 + 26r^3s^4t^2 + 112r^3s^3t^5 - 728r^3s^3t^4 + 1456r^3s^3t^3 - 44r^3s^2t^6 + 130r^3s^2t^5 + 26r^3s^2t^4 - 70r^3st^7 + 364r^3st^6 - 546r^3st^5 + 30r^3t^8 - 130r^3t^7 + 156r^3t^6 + 30r^2s^9 - 70r^2s^8t - 130r^2s^8 - 44r^2s^7t^2 + 364r^2s^7t + 156r^2s^7 + 112r^2s^6t^3 + 130r^2s^6t^2 - 546r^2s^6t + 112r^2s^5t^4 - 728r^2s^5t^3 + 26r^2s^5t^2 + 112r^2s^4t^5 - 728r^2s^4t^4 + 1456r^2s^4t^3 + 112r^2s^3t^6 - 728r^2s^3t^5 + 1456r^2s^3t^4 - 44r^2s^2t^7 + 130r^2s^2t^6 + 26r^2s^2t^5 - 70r^2st^8 + 364r^2st^7 - 546r^2st^6 + 30r^2t^9 - 130r^2t^8 + 156r^2t^7 - 35rs^{10} + 125rs^9t + 130rs^9 - 135rs^8t^2 - 520rs^8t - 130rs^8 + 21rs^7t^3 + 676rs^7t^2 + 598rs^7t + 21rs^6t^4 - 182rs^6t^3 - 975rs^6t^2 + 21rs^5t^5 - 182rs^5t^4 + 455rs^5t^3 + 21rs^4t^6 - 182rs^4t^5 + 455rs^4t^4 + 21rs^3t^7 - 182rs^3t^6 + 455rs^3t^5 - 135rs^2t^8 + 676rs^2t^7 - 975rs^2t^6 + 125rst^9 - 520rst^8 + 598rst^7 - 35rt^{10} + 130rt^9 - 130rt^8 - 35s^{10}t + 95s^9t^2 + 130s^9t - 35s^8t^3 - 390s^8t^2 - 130s^8t - 35s^7t^4 + 182s^7t^3 + 442s^7t^2 - 35s^6t^5 + 182s^6t^4 - 273s^6t^3 - 35s^5t^6 + 182s^5t^5 - 273s^5t^4 - 35s^4t^7 + 182s^4t^6 - 273s^4t^5 - 35s^3t^8 + 182s^3t^7 - 273s^3t^6 + 95s^2t^9 - 390s^2t^8 + 442s^2t^7 - 35st^{10} + 130st^9 - 130st^8))/(2162160r^2(r - s)^2(r - t)^2(r - 1)^2) - (s^2t^2(x - x_n)^6)/(360hr(r - s)^2(r - t)^2(r - 1)^2) + (st(x - x_n)^7(2rs + 2rt + st + 2rst))/(840h^2r^2(r - s)^2(r - t)^2(r - 1)^2) + (h^4st(x - x_n)(56r^9 - 126r^8s - 126r^8t - 182r^8 + 30r^7s^2 + 316r^7st + 442r^7s + 30r^7t^2 + 442r^7t + 156r^7 + 30r^6s^3 - 100r^6s^2t - 130r^6s^2 - 100r^6st^2 - 1222r^6st - 416r^6s + 30r^6t^3 - 130r^6t^2 - 416r^6t + 30r^5s^4 - 100r^5s^3t - 130r^5s^3 + 56r^5s^2t^2 + 494r^5s^2t + 156r^5s^2 - 100r^5st^3 + 494r^5st^2 + 1300r^5st + 30r^5t^4 - 130r^5t^3 + 156r^5t^2 + 30r^4s^5 - 100r^4s^4t - 130r^4s^4 + 56r^4s^3t^2 + 494r^4s^3t + 156r^4s^3 + 56r^4s^2t^3 - 364r^4s^2t^2 - 702r^4s^2t - 100r^4st^4 + 494r^4st^3 - 702r^4st^2 + 30r^4t^5 - 130r^4t^4 + 156r^4t^3 + 30r^3s^6 - 100r^3s^5t - 130r^3s^5 + 56r^3s^4t^2 + 494r^3s^4t + 156r^3s^4 + 56r^3s^3t^3 - 364r^3s^3t^2 - 702r^3s^3t + 56r^3s^2t^4 - 364r^3s^2t^3 + 728r^3s^2t^2 - 100r^3st^5\\
    $
    $
    + 494r^3st^4 - 702r^3st^3 + 30r^3t^6 - 130r^3t^5 + 156r^3t^4 + 30r^2s^7 - 100r^2s^6t - 130r^2s^6 + 56r^2s^5t^2 + 494r^2s^5t + 156r^2s^5 + 56r^2s^4t^3 - 364r^2s^4t^2 - 702r^2s^4t + 56r^2s^3t^4 - 364r^2s^3t^3 + 728r^2s^3t^2 + 56r^2s^2t^5 - 364r^2s^2t^4 + 728r^2s^2t^3 - 100r^2st^6 + 494r^2st^5 - 702r^2st^4 + 30r^2t^7 - 130r^2t^6 + 156r^2t^5 + 30rs^8 - 100rs^7t - 130rs^7 + 56rs^6t^2 + 494rs^6t + 156rs^6 + 56rs^5t^3 - 364rs^5t^2 - 702rs^5t + 56rs^4t^4 - 364rs^4t^3 + 728rs^4t^2 + 56rs^3t^5 - 364rs^3t^4 + 728rs^3t^3 + 56rs^2t^6 - 364rs^2t^5 + 728rs^2t^4 - 100rst^7 + 494rst^6 - 702rst^5 + 30rt^8 - 130rt^7 + 156rt^6 - 35s^9 + 95s^8t + 130s^8 - 35s^7t^2 - 390s^7t - 130s^7 - 35s^6t^3 + 182s^6t^2 + 442s^6t - 35s^5t^4 + 182s^5t^3 - 273s^5t^2 - 35s^4t^5 + 182s^4t^4 - 273s^4t^3 - 35s^3t^6 + 182s^3t^5 - 273s^3t^4 - 35s^2t^7 + 182s^2t^6 - 273s^2t^5 + 95st^8 - 390st^7 + 442st^6 - 35t^9 + 130t^8 - 130t^7))/(2162160r(r - s)^2(r - t)^2(r - 1)^2),\\\\
    \gamma_s = (x - x_n)^{13}/(17160h^8s^2(r - s)^2(s - t)^2(s - 1)^2) - ((x - x_n)^{10}(2r + s + 2t + 4rs + 8rt + 4st + r^2s + 2rt^2 + 2r^2t + st^2 + 2r^2 + 2t^2 + 4rst))/(5040h^5s^2(r - s)^2(s - t)^2(s - 1)^2) + ((x - x_n)^{11}(4r + 2s + 4t + 2rs + 4rt + 2st + r^2 + t^2 + 1))/(7920h^6s^2(r - s)^2(s - t)^2(s - 1)^2) + ((x - x_n)^9(r^2t^2 + 2rs + 4rt + 2st + 2r^2s + 4rt^2 + 4r^2t + 2st^2 + r^2 + t^2 + 2rst^2 + 2r^2st + 8rst))/(3024h^4s^2(r - s)^2(s - t)^2(s - 1)^2) - ((x - x_n)^8(2r^2t^2 + r^2s + 2rt^2 + 2r^2t + st^2 + 4rst^2 + 4r^2st + r^2st^2 + 4rst))/(1680h^3s^2(r - s)^2(s - t)^2(s - 1)^2) + (h^2(x - x_n)^3(30r^9s - 35r^{10} + 95r^9t + 130r^9 + 30r^8s^2 - 100r^8st - 130r^8s - 35r^8t^2 - 390r^8t - 130r^8 + 30r^7s^3 - 100r^7s^2t - 130r^7s^2 + 56r^7st^2 + 494r^7st + 156r^7s - 35r^7t^3 + 182r^7t^2 + 442r^7t + 30r^6s^4 - 100r^6s^3t - 130r^6s^3 + 56r^6s^2t^2 + 494r^6s^2t + 156r^6s^2 + 56r^6st^3 - 364r^6st^2 - 702r^6st - 35r^6t^4 + 182r^6t^3 - 273r^6t^2 + 30r^5s^5 - 100r^5s^4t - 130r^5s^4 + 56r^5s^3t^2 + 494r^5s^3t + 156r^5s^3 + 56r^5s^2t^3 - 364r^5s^2t^2 - 702r^5s^2t + 56r^5st^4 - 364r^5st^3 + 728r^5st^2 - 35r^5t^5 + 182r^5t^4 - 273r^5t^3 + 30r^4s^6 - 100r^4s^5t - 130r^4s^5 + 56r^4s^4t^2 + 494r^4s^4t + 156r^4s^4 + 56r^4s^3t^3 - 364r^4s^3t^2 - 702r^4s^3t + 56r^4s^2t^4 - 364r^4s^2t^3 + 728r^4s^2t^2 + 56r^4st^5 - 364r^4st^4 + 728r^4st^3 - 35r^4t^6 + 182r^4t^5 - 273r^4t^4 + 30r^3s^7 - 100r^3s^6t - 130r^3s^6 + 56r^3s^5t^2 + 494r^3s^5t + 156r^3s^5 + 56r^3s^4t^3 - 364r^3s^4t^2 - 702r^3s^4t + 56r^3s^3t^4 - 364r^3s^3t^3 + 728r^3s^3t^2 + 56r^3s^2t^5 - 364r^3s^2t^4 + 728r^3s^2t^3 + 56r^3st^6 - 364r^3st^5 + 728r^3st^4 - 35r^3t^7 + 182r^3t^6 - 273r^3t^5 + 30r^2s^8 - 100r^2s^7t - 130r^2s^7 + 56r^2s^6t^2 + 494r^2s^6t + 156r^2s^6 + 56r^2s^5t^3 - 364r^2s^5t^2 - 702r^2s^5t + 56r^2s^4t^4 - 364r^2s^4t^3 + 728r^2s^4t^2 + 56r^2s^3t^5 - 364r^2s^3t^4 + 728r^2s^3t^3 + 56r^2s^2t^6 - 364r^2s^2t^5 + 728r^2s^2t^4 + 56r^2st^7 - 364r^2st^6 + 728r^2st^5 - 35r^2t^8 + 182r^2t^7 - 273r^2t^6 - 126rs^9 + 316rs^8t + 442rs^8 - 100rs^7t^2 - 1222rs^7t - 416rs^7 - 100rs^6t^3 + 494rs^6t^2 + 1300rs^6t - 100rs^5t^4 + 494rs^5t^3 - 702rs^5t^2 - 100rs^4t^5 + 494rs^4t^4 - 702rs^4t^3 - 100rs^3t^6 + 494rs^3t^5 - 702rs^3t^4 - 100rs^2t^7 + 494rs^2t^6 - 702rs^2t^5 - 100rst^8 + 494rst^7 - 702rst^6 + 95rt^9 - 390rt^8 + 442rt^7 + 56s^{10} - 126s^9t - 182s^9 + 30s^8t^2 + 442s^8t + 156s^8 + 30s^7t^3 - 130s^7t^2 - 416s^7t + 30s^6t^4 - 130s^6t^3 + 156s^6t^2 + 30s^5t^5 - 130s^5t^4 + 156s^5t^3 + 30s^4t^6 - 130s^4t^5 + 156s^4t^4 + 30s^3t^7 - 130s^3t^6 + 156s^3t^5 + 30s^2t^8 - 130s^2t^7 + 156s^2t^6 + 30st^9 - 130st^8 + 156st^7 - 35t^{10} + 130t^9 - 130t^8))/(2162160s^2(r - s)^2(s - t)^2(s - 1)^2) - ((x - x_n)^{12}(2r + s + 2t + 2))/(11880h^7s^2(r - s)^2(s - t)^2(s - 1)^2) - (h^3(x - x_n)^2(30r^9s^2 - 35r^{10}t - 35r^{10}s + 125r^9st + 130r^9s + 95r^9t^2 + 130r^9t + 30r^8s^3 - 70r^8s^2t - 130r^8s^2 - 135r^8st^2 - 520r^8st - 130r^8s - 35r^8t^3 - 390r^8t^2 - 130r^8t + 30r^7s^4 - 70r^7s^3t - 130r^7s^3 - 44r^7s^2t^2 + 364r^7s^2t + 156r^7s^2 + 21r^7st^3 + 676r^7st^2 + 598r^7st - 35r^7t^4 + 182r^7t^3 + 442r^7t^2 + 30r^6s^5 - 70r^6s^4t - 130r^6s^4 - 44r^6s^3t^2 + 364r^6s^3t + 156r^6s^3 + 112r^6s^2t^3 + 130r^6s^2t^2 - 546r^6s^2t + 21r^6st^4 - 182r^6st^3 - 975r^6st^2 - 35r^6t^5 + 182r^6t^4 - 273r^6t^3 + 30r^5s^6 - 70r^5s^5t - 130r^5s^5 - 44r^5s^4t^2 + 364r^5s^4t + 156r^5s^4 + 112r^5s^3t^3 + 130r^5s^3t^2 - 546r^5s^3t + 112r^5s^2t^4 - 728r^5s^2t^3 + 26r^5s^2t^2 + 21r^5st^5 - 182r^5st^4 + 455r^5st^3 - 35r^5t^6 + 182r^5t^5 - 273r^5t^4 + 30r^4s^7 - 70r^4s^6t - 130r^4s^6 - 44r^4s^5t^2 + 364r^4s^5t + 156r^4s^5 + 112r^4s^4t^3 + 130r^4s^4t^2 - 546r^4s^4t + 112r^4s^3t^4 - 728r^4s^3t^3 + 26r^4s^3t^2 + 112r^4s^2t^5 - 728r^4s^2t^4 + 1456r^4s^2t^3 + 21r^4st^6 - 182r^4st^5 + 455r^4st^4 - 35r^4t^7 + 182r^4t^6 - 273r^4t^5 + 30r^3s^8 - 70r^3s^7t - 130r^3s^7 - 44r^3s^6t^2 + 364r^3s^6t + 156r^3s^6 + 112r^3s^5t^3 + 130r^3s^5t^2 - 546r^3s^5t + 112r^3s^4t^4 - 728r^3s^4t^3 + 26r^3s^4t^2 + 112r^3s^3t^5 - 728r^3s^3t^4 + 1456r^3s^3t^3 + 112r^3s^2t^6 - 728r^3s^2t^5 + 1456r^3s^2t^4 + 21r^3st^7 - 182r^3st^6 + 455r^3st^5 - 35r^3t^8 + 182r^3t^7 - 273r^3t^6 - 126r^2s^9 + 346r^2s^8t + 442r^2s^8 - 200r^2s^7t^2 - 1352r^2s^7t - 416r^2s^7 - 44r^2s^6t^3 + 988r^2s^6t^2 + 1456r^2s^6t - 44r^2s^5t^4 + 130r^2s^5t^3 - 1404r^2s^5t^2 - 44r^2s^4t^5 + 130r^2s^4t^4 + 26r^2s^4t^3 - 44r^2s^3t^6 + 130r^2s^3t^5 + 26r^2s^3t^4 - 44r^2s^2t^7 + 130r^2s^2t^6 + 26r^2s^2t^5 - 135r^2st^8 + 676r^2st^7 - 975r^2st^6 + 95r^2t^9 - 390r^2t^8 + 442r^2t^7 + 56rs^{10} - 252rs^9t - 182rs^9 + 346rs^8t^2 + 884rs^8t + 156rs^8 - 70rs^7t^3 - 1352rs^7t^2 - 832rs^7t - 70rs^6t^4 + 364rs^6t^3 + 1456rs^6t^2
    - 70rs^5t^5 + 364rs^5t^4 - 546rs^5t^3 - 70rs^4t^6 + 364rs^4t^5 - 546rs^4t^4 - 70rs^3t^7 + 364rs^3t^6 - 546rs^3t^5 - 70rs^2t^8 + 364rs^2t^7 - 546rs^2t^6 + 125rst^9 - 520rst^8 + 598rst^7 - 35rt^{10} + 130rt^9 - 130rt^8 + 56s^{10}t - 126s^9t^2 - 182s^9t + 30s^8t^3 + 442s^8t^2 + 156s^8t + 30s^7t^4 - 130s^7t^3 - 416s^7t^2 + 30s^6t^5 - 130s^6t^4 + 156s^6t^3 + 30s^5t^6 - 130s^5t^5 + 156s^5t^4 + 30s^4t^7 - 130s^4t^6 + 156s^4t^5 + 30s^3t^8 - 130s^3t^7 + 156s^3t^6 + 30s^2t^9 - 130s^2t^8 + 156s^2t^7 - 35st^{10} + 130st^9 - 130st^8))/(2162160s^2(r - s)^2(s - t)^2(s - 1)^2) - (r^2t^2(x - x_n)^6)/(360hs(r - s)^2(s - t)^2(s - 1)^2) + (rt(x - x_n)^7(2rs + rt + 2st + 2rst))/(840h^2s^2(r - s)^2(s - t)^2(s - 1)^2) + (h^4rt(x - x_n)(30r^8s - 35r^9 + 95r^8t + 130r^8 + 30r^7s^2 - 100r^7st - 130r^7s - 35r^7t^2 - 390r^7t - 130r^7 + 30r^6s^3 - 100r^6s^2t - 130r^6s^2 + 56r^6st^2 + 494r^6st + 156r^6s - 35r^6t^3 + 182r^6t^2 + 442r^6t + 30r^5s^4 - 100r^5s^3t - 130r^5s^3 + 56r^5s^2t^2 + 494r^5s^2t + 156r^5s^2 + 56r^5st^3 - 364r^5st^2 - 702r^5st - 35r^5t^4 + 182r^5t^3 - 273r^5t^2 + 30r^4s^5 - 100r^4s^4t - 130r^4s^4 + 56r^4s^3t^2 + 494r^4s^3t + 156r^4s^3 + 56r^4s^2t^3 - 364r^4s^2t^2 - 702r^4s^2t + 56r^4st^4 - 364r^4st^3 + 728r^4st^2 - 35r^4t^5 + 182r^4t^4 - 273r^4t^3 + 30r^3s^6 - 100r^3s^5t - 130r^3s^5 + 56r^3s^4t^2 + 494r^3s^4t + 156r^3s^4 + 56r^3s^3t^3 - 364r^3s^3t^2 - 702r^3s^3t + 56r^3s^2t^4 - 364r^3s^2t^3 + 728r^3s^2t^2 + 56r^3st^5 - 364r^3st^4 + 728r^3st^3 - 35r^3t^6 + 182r^3t^5 - 273r^3t^4 + 30r^2s^7 - 100r^2s^6t - 130r^2s^6 + 56r^2s^5t^2 + 494r^2s^5t + 156r^2s^5 + 56r^2s^4t^3 - 364r^2s^4t^2 - 702r^2s^4t + 56r^2s^3t^4 - 364r^2s^3t^3 + 728r^2s^3t^2 + 56r^2s^2t^5 - 364r^2s^2t^4 + 728r^2s^2t^3 + 56r^2st^6 - 364r^2st^5 + 728r^2st^4 - 35r^2t^7 + 182r^2t^6 - 273r^2t^5 - 126rs^8 + 316rs^7t + 442rs^7 - 100rs^6t^2 - 1222rs^6t - 416rs^6 - 100rs^5t^3 + 494rs^5t^2 + 1300rs^5t - 100rs^4t^4 + 494rs^4t^3 - 702rs^4t^2 - 100rs^3t^5 + 494rs^3t^4 - 702rs^3t^3 - 100rs^2t^6 + 494rs^2t^5 - 702rs^2t^4 - 100rst^7 + 494rst^6 - 702rst^5 + 95rt^8 - 390rt^7 + 442rt^6 + 56s^9 - 126s^8t - 182s^8 + 30s^7t^2 + 442s^7t + 156s^7 + 30s^6t^3 - 130s^6t^2 - 416s^6t + 30s^5t^4 - 130s^5t^3 + 156s^5t^2 + 30s^4t^5 - 130s^4t^4 + 156s^4t^3 + 30s^3t^6 - 130s^3t^5 + 156s^3t^4 + 30s^2t^7 - 130s^2t^6 + 156s^2t^5 + 30st^8 - 130st^7 + 156st^6 - 35t^9 + 130t^8 - 130t^7))/(2162160s(r - s)^2(s - t)^2(s - 1)^2),\\\\
    \gamma_t = (x - x_n)^{13}/(17160h^8t^2(r - t)^2(s - t)^2(t - 1)^2) - ((x - x_n)^{10}(2r + 2s + t + 8rs + 4rt + 4st + 2rs^2 + 2r^2s + r^2t + s^2t + 2r^2 + 2s^2 + 4rst))/(5040h^5t^2(r - t)^2(s - t)^2(t - 1)^2) + ((x - x_n)^{11}(4r + 4s + 2t + 4rs + 2rt + 2st + r^2 + s^2 + 1))/(7920h^6t^2(r - t)^2(s - t)^2(t - 1)^2) + ((x - x_n)^9(r^2s^2 + 4rs + 2rt + 2st + 4rs^2 + 4r^2s + 2r^2t + 2s^2t + r^2 + s^2 + 2rs^2t + 2r^2st + 8rst))/(3024h^4t^2(r - t)^2(s - t)^2(t - 1)^2) - ((x - x_n)^8(2r^2s^2 + 2rs^2 + 2r^2s + r^2t + s^2t + 4rs^2t + 4r^2st + r^2s^2t + 4rst))/(1680h^3t^2(r - t)^2(s - t)^2(t - 1)^2) + (h^2(x - x_n)^3(95r^9s - 35r^{10} + 30r^9t + 130r^9 - 35r^8s^2 - 100r^8st - 390r^8s + 30r^8t^2 - 130r^8t - 130r^8 - 35r^7s^3 + 56r^7s^2t + 182r^7s^2 - 100r^7st^2 + 494r^7st + 442r^7s + 30r^7t^3 - 130r^7t^2 + 156r^7t - 35r^6s^4 + 56r^6s^3t + 182r^6s^3 + 56r^6s^2t^2 - 364r^6s^2t - 273r^6s^2 - 100r^6st^3 + 494r^6st^2 - 702r^6st + 30r^6t^4 - 130r^6t^3 + 156r^6t^2 - 35r^5s^5 + 56r^5s^4t + 182r^5s^4 + 56r^5s^3t^2 - 364r^5s^3t - 273r^5s^3 + 56r^5s^2t^3 - 364r^5s^2t^2 + 728r^5s^2t - 100r^5st^4 + 494r^5st^3 - 702r^5st^2 + 30r^5t^5 - 130r^5t^4 + 156r^5t^3 - 35r^4s^6 + 56r^4s^5t + 182r^4s^5 + 56r^4s^4t^2 - 364r^4s^4t - 273r^4s^4 + 56r^4s^3t^3 - 364r^4s^3t^2 + 728r^4s^3t + 56r^4s^2t^4 - 364r^4s^2t^3 + 728r^4s^2t^2 - 100r^4st^5 + 494r^4st^4 - 702r^4st^3 + 30r^4t^6 - 130r^4t^5 + 156r^4t^4 - 35r^3s^7 + 56r^3s^6t + 182r^3s^6 + 56r^3s^5t^2 - 364r^3s^5t - 273r^3s^5 + 56r^3s^4t^3 - 364r^3s^4t^2 + 728r^3s^4t + 56r^3s^3t^4 - 364r^3s^3t^3 + 728r^3s^3t^2 + 56r^3s^2t^5 - 364r^3s^2t^4 + 728r^3s^2t^3 - 100r^3st^6 + 494r^3st^5 - 702r^3st^4 + 30r^3t^7 - 130r^3t^6 + 156r^3t^5 - 35r^2s^8 + 56r^2s^7t + 182r^2s^7 + 56r^2s^6t^2 - 364r^2s^6t - 273r^2s^6 + 56r^2s^5t^3 - 364r^2s^5t^2 + 728r^2s^5t + 56r^2s^4t^4 - 364r^2s^4t^3 + 728r^2s^4t^2 + 56r^2s^3t^5 - 364r^2s^3t^4 + 728r^2s^3t^3 + 56r^2s^2t^6 - 364r^2s^2t^5 + 728r^2s^2t^4 - 100r^2st^7 + 494r^2st^6 - 702r^2st^5 + 30r^2t^8 - 130r^2t^7 + 156r^2t^6 + 95rs^9 - 100rs^8t - 390rs^8 - 100rs^7t^2 + 494rs^7t + 442rs^7 - 100rs^6t^3 + 494rs^6t^2 - 702rs^6t - 100rs^5t^4 + 494rs^5t^3 - 702rs^5t^2 - 100rs^4t^5 + 494rs^4t^4 - 702rs^4t^3 - 100rs^3t^6 + 494rs^3t^5 - 702rs^3t^4 - 100rs^2t^7 + 494rs^2t^6 - 702rs^2t^5 + 316rst^8 - 1222rst^7 + 1300rst^6 - 126rt^9 + 442rt^8 - 416rt^7 - 35s^{10} + 30s^9t + 130s^9 + 30s^8t^2 - 130s^8t - 130s^8 + 30s^7t^3 - 130s^7t^2 + 156s^7t + 30s^6t^4 - 130s^6t^3 + 156s^6t^2 + 30s^5t^5 - 130s^5t^4 + 156s^5t^3 + 30s^4t^6 - 130s^4t^5 + 156s^4t^4 + 30s^3t^7 - 130s^3t^6 + 156s^3t^5 + 30s^2t^8 - 130s^2t^7 + 156s^2t^6 - 126st^9 + 442st^8 - 416st^7 + 56t^{10} - 182t^9 + 156t^8))/(2162160t^2(r - t)^2(s - t)^2(t - 1)^2) - ((x - x_n)^{12}(2r + 2s + t + 2))/(11880h^7t^2(r - t)^2(s - t)^2(t - 1)^2) - (h^3(x - x_n)^2(95r^9s^2 - 35r^{10}t - 35r^{10}s + 125r^9st + 130r^9s + 30r^9t^2 + 130r^9t - 35r^8s^3 - 135r^8s^2t - 390r^8s^2 - 70r^8st^2 - 520r^8st - 130r^8s + 30r^8t^3 - 130r^8t^2 - 130r^8t - 35r^7s^4 + 21r^7s^3t + 182r^7s^3 - 44r^7s^2t^2 + 676r^7s^2t + 442r^7s^2 - 70r^7st^3 + 364r^7st^2 + 598r^7st + 30r^7t^4 - 130r^7t^3 + 156r^7t^2 - 35r^6s^5 + 21r^6s^4t + 182r^6s^4 + 112r^6s^3t^2 - 182r^6s^3t - \\
    $
    $
    273r^6s^3 - 44r^6s^2t^3 + 130r^6s^2t^2 - 975r^6s^2t - 70r^6st^4 + 364r^6st^3 - 546r^6st^2 + 30r^6t^5 - 130r^6t^4 + 156r^6t^3 - 35r^5s^6 + 21r^5s^5t + 182r^5s^5 + 112r^5s^4t^2 - 182r^5s^4t - 273r^5s^4 + 112r^5s^3t^3 - 728r^5s^3t^2 + 455r^5s^3t - 44r^5s^2t^4 + 130r^5s^2t^3 + 26r^5s^2t^2 - 70r^5st^5 + 364r^5st^4 - 546r^5st^3 + 30r^5t^6 - 130r^5t^5 + 156r^5t^4 - 35r^4s^7 + 21r^4s^6t + 182r^4s^6 + 112r^4s^5t^2 - 182r^4s^5t - 273r^4s^5 + 112r^4s^4t^3 - 728r^4s^4t^2 + 455r^4s^4t + 112r^4s^3t^4 - 728r^4s^3t^3 + 1456r^4s^3t^2 - 44r^4s^2t^5 + 130r^4s^2t^4 + 26r^4s^2t^3 - 70r^4st^6 + 364r^4st^5 - 546r^4st^4 + 30r^4t^7 - 130r^4t^6 + 156r^4t^5 - 35r^3s^8 + 21r^3s^7t + 182r^3s^7 + 112r^3s^6t^2 - 182r^3s^6t - 273r^3s^6 + 112r^3s^5t^3 - 728r^3s^5t^2 + 455r^3s^5t + 112r^3s^4t^4 - 728r^3s^4t^3 + 1456r^3s^4t^2 + 112r^3s^3t^5 - 728r^3s^3t^4 + 1456r^3s^3t^3 - 44r^3s^2t^6 + 130r^3s^2t^5 + 26r^3s^2t^4 - 70r^3st^7 + 364r^3st^6 - 546r^3st^5 + 30r^3t^8 - 130r^3t^7 + 156r^3t^6 + 95r^2s^9 - 135r^2s^8t - 390r^2s^8 - 44r^2s^7t^2 + 676r^2s^7t + 442r^2s^7 - 44r^2s^6t^3 + 130r^2s^6t^2 - 975r^2s^6t - 44r^2s^5t^4 + 130r^2s^5t^3 + 26r^2s^5t^2 - 44r^2s^4t^5 + 130r^2s^4t^4 + 26r^2s^4t^3 - 44r^2s^3t^6 + 130r^2s^3t^5 + 26r^2s^3t^4 - 200r^2s^2t^7 + 988r^2s^2t^6 - 1404r^2s^2t^5 + 346r^2st^8 - 1352r^2st^7 + 1456r^2st^6 - 126r^2t^9 + 442r^2t^8 - 416r^2t^7 - 35rs^{10} + 125rs^9t + 130rs^9 - 70rs^8t^2 - 520rs^8t - 130rs^8 - 70rs^7t^3 + 364rs^7t^2 + 598rs^7t - 70rs^6t^4 + 364rs^6t^3 - 546rs^6t^2 - 70rs^5t^5 + 364rs^5t^4 - 546rs^5t^3 - 70rs^4t^6 + 364rs^4t^5 - 546rs^4t^4 - 70rs^3t^7 + 364rs^3t^6 - 546rs^3t^5 + 346rs^2t^8 - 1352rs^2t^7 + 1456rs^2t^6 - 252rst^9 + 884rst^8 - 832rst^7 + 56rt^{10} - 182rt^9 + 156rt^8 - 35s^{10}t + 30s^9t^2 + 130s^9t + 30s^8t^3 - 130s^8t^2 - 130s^8t + 30s^7t^4 - 130s^7t^3 + 156s^7t^2 + 30s^6t^5 - 130s^6t^4 + 156s^6t^3 + 30s^5t^6 - 130s^5t^5 + 156s^5t^4 + 30s^4t^7 - 130s^4t^6 + 156s^4t^5 + 30s^3t^8 - 130s^3t^7 + 156s^3t^6 - 126s^2t^9 + 442s^2t^8 - 416s^2t^7 + 56st^{10} - 182st^9 + 156st^8))/(2162160t^2(r - t)^2(s - t)^2(t - 1)^2) - (r^2s^2(x - x_n)^6)/(360ht(r - t)^2(s - t)^2(t - 1)^2) + (rs(x - x_n)^7(rs + 2rt + 2st + 2rst))/(840h^2t^2(r - t)^2(s - t)^2(t - 1)^2) + (h^4rs(x - x_n)(95r^8s - 35r^9 + 30r^8t + 130r^8 - 35r^7s^2 - 100r^7st - 390r^7s + 30r^7t^2 - 130r^7t - 130r^7 - 35r^6s^3 + 56r^6s^2t + 182r^6s^2 - 100r^6st^2 + 494r^6st + 442r^6s + 30r^6t^3 - 130r^6t^2 + 156r^6t - 35r^5s^4 + 56r^5s^3t + 182r^5s^3 + 56r^5s^2t^2 - 364r^5s^2t - 273r^5s^2 - 100r^5st^3 + 494r^5st^2 - 702r^5st + 30r^5t^4 - 130r^5t^3 + 156r^5t^2 - 35r^4s^5 + 56r^4s^4t + 182r^4s^4 + 56r^4s^3t^2 - 364r^4s^3t - 273r^4s^3 + 56r^4s^2t^3 - 364r^4s^2t^2 + 728r^4s^2t - 100r^4st^4 + 494r^4st^3 - 702r^4st^2 + 30r^4t^5 - 130r^4t^4 + 156r^4t^3 - 35r^3s^6 + 56r^3s^5t + 182r^3s^5 + 56r^3s^4t^2 - 364r^3s^4t - 273r^3s^4 + 56r^3s^3t^3 - 364r^3s^3t^2 + 728r^3s^3t + 56r^3s^2t^4 - 364r^3s^2t^3 + 728r^3s^2t^2 - 100r^3st^5 + 494r^3st^4 - 702r^3st^3 + 30r^3t^6 - 130r^3t^5 + 156r^3t^4 - 35r^2s^7 + 56r^2s^6t + 182r^2s^6 + 56r^2s^5t^2 - 364r^2s^5t - 273r^2s^5 + 56r^2s^4t^3 - 364r^2s^4t^2 + 728r^2s^4t + 56r^2s^3t^4 - 364r^2s^3t^3 + 728r^2s^3t^2 + 56r^2s^2t^5 - 364r^2s^2t^4 + 728r^2s^2t^3 - 100r^2st^6 + 494r^2st^5 - 702r^2st^4 + 30r^2t^7 - 130r^2t^6 + 156r^2t^5 + 95rs^8 - 100rs^7t - 390rs^7 - 100rs^6t^2 + 494rs^6t + 442rs^6 - 100rs^5t^3 + 494rs^5t^2 - 702rs^5t - 100rs^4t^4 + 494rs^4t^3 - 702rs^4t^2 - 100rs^3t^5 + 494rs^3t^4 - 702rs^3t^3 - 100rs^2t^6 + 494rs^2t^5 - 702rs^2t^4 + 316rst^7 - 1222rst^6 + 1300rst^5 - 126rt^8 + 442rt^7 - 416rt^6 - 35s^9 + 30s^8t + 130s^8 + 30s^7t^2 - 130s^7t - 130s^7 + 30s^6t^3 - 130s^6t^2 + 156s^6t + 30s^5t^4 - 130s^5t^3 + 156s^5t^2 + 30s^4t^5 - 130s^4t^4 + 156s^4t^3 + 30s^3t^6 - 130s^3t^5 + 156s^3t^4 + 30s^2t^7 - 130s^2t^6 + 156s^2t^5 - 126st^8 + 442st^7 - 416st^6 + 56t^9 - 182t^8 + 156t^7))/(2162160t(r - t)^2(s - t)^2(t - 1)^2),\\\\
    \gamma_1 = (x - x_n)^{13}/(17160h^8(r - 1)^2(s - 1)^2(t - 1)^2) - ((x - x_n)^{10}(2r^2s + 2r^2t + r^2 + 2rs^2 + 8rst + 4rs + 2rt^2 + 4rt + 2s^2t + s^2 + 2st^2 + 4st + t^2))/(5040h^5(r - 1)^2(s - 1)^2(t - 1)^2) + ((x - x_n)^9(r^2s^2 + 4r^2st + 2r^2s + r^2t^2 + 2r^2t + 4rs^2t + 2rs^2 + 4rst^2 + 8rst + 2rt^2 + s^2t^2 + 2s^2t + 2st^2))/(3024h^4(r - 1)^2(s - 1)^2(t - 1)^2) - (h^3(x - x_n)^2(95r^9s^2 - 35r^{10}t - 35r^{10}s + 190r^9st + 65r^9s + 95r^9t^2 + 65r^9t - 35r^8s^3 - 330r^8s^2t - 195r^8s^2 - 330r^8st^2 - 390r^8st - 35r^8t^3 - 195r^8t^2 - 35r^7s^4 + 112r^7s^3t + 91r^7s^3 + 294r^7s^2t^2 + 780r^7s^2t + 112r^7st^3 + 780r^7st^2 - 35r^7t^4 + 91r^7t^3 - 35r^6s^5 + 112r^6s^4t + 91r^6s^4 + 21r^6s^3t^2 - 364r^6s^3t + 21r^6s^2t^3 - 910r^6s^2t^2 + 112r^6st^4 - 364r^6st^3 - 35r^6t^5 + 91r^6t^4 - 35r^5s^6 + 112r^5s^5t + 91r^5s^5 + 21r^5s^4t^2 - 364r^5s^4t - 252r^5s^3t^3 + 91r^5s^3t^2 + 21r^5s^2t^4 + 91r^5s^2t^3 + 112r^5st^5 - 364r^5st^4 - 35r^5t^6 + 91r^5t^5 - 35r^4s^7 + 112r^4s^6t + 91r^4s^6 + 21r^4s^5t^2 - 364r^4s^5t - 252r^4s^4t^3 + 91r^4s^4t^2 - 252r^4s^3t^4 + 1092r^4s^3t^3 + 21r^4s^2t^5 + 91r^4s^2t^4 + 112r^4st^6 - 364r^4st^5 - 35r^4t^7 + 91r^4t^6 - 35r^3s^8 + 112r^3s^7t + 91r^3s^7 + 21r^3s^6t^2 - 364r^3s^6t - 252r^3s^5t^3 + 91r^3s^5t^2 - 252r^3s^4t^4 + 1092r^3s^4t^3 - 252r^3s^3t^5 + 1092r^3s^3t^4 + 21r^3s^2t^6 + 91r^3s^2t^5 + 112r^3st^7 - 364r^3st^6 - 35r^3t^8 + 91r^3t^7 + 95r^2s^9 - 330r^2s^8t - 195r^2s^8 + 294r^2s^7t^2 +\\
    $
    $
    780r^2s^7t + 21r^2s^6t^3 - 910r^2s^6t^2 + 21r^2s^5t^4 + 91r^2s^5t^3 + 21r^2s^4t^5 + 91r^2s^4t^4 + 21r^2s^3t^6 + 91r^2s^3t^5 + 294r^2s^2t^7 - 910r^2s^2t^6 - 330r^2st^8 + 780r^2st^7 + 95r^2t^9 - 195r^2t^8 - 35rs^{10} + 190rs^9t + 65rs^9 - 330rs^8t^2 - 390rs^8t + 112rs^7t^3 + 780rs^7t^2 + 112rs^6t^4 - 364rs^6t^3 + 112rs^5t^5 - 364rs^5t^4 + 112rs^4t^6 - 364rs^4t^5 + 112rs^3t^7 - 364rs^3t^6 - 330rs^2t^8 + 780rs^2t^7 + 190rst^9 - 390rst^8 - 35rt^{10} + 65rt^9 - 35s^{10}t + 95s^9t^2 + 65s^9t - 35s^8t^3 - 195s^8t^2 - 35s^7t^4 + 91s^7t^3 - 35s^6t^5 + 91s^6t^4 - 35s^5t^6 + 91s^5t^5 - 35s^4t^7 + 91s^4t^6 - 35s^3t^8 + 91s^3t^7 + 95s^2t^9 - 195s^2t^8 - 35st^{10} + 65st^9))/(2162160(r - 1)^2(s - 1)^2(t - 1)^2) - (h^2(x - x_n)^3(35r^{10} - 95r^9s - 95r^9t - 65r^9 + 35r^8s^2 + 295r^8st + 195r^8s + 35r^8t^2 + 195r^8t + 35r^7s^3 - 147r^7s^2t - 91r^7s^2 - 147r^7st^2 - 689r^7st + 35r^7t^3 - 91r^7t^2 + 35r^6s^4 - 147r^6s^3t - 91r^6s^3 + 126r^6s^2t^2 + 455r^6s^2t - 147r^6st^3 + 455r^6st^2 + 35r^6t^4 - 91r^6t^3 + 35r^5s^5 - 147r^5s^4t - 91r^5s^4 + 126r^5s^3t^2 + 455r^5s^3t + 126r^5s^2t^3 - 546r^5s^2t^2 - 147r^5st^4 + 455r^5st^3 + 35r^5t^5 - 91r^5t^4 + 35r^4s^6 - 147r^4s^5t - 91r^4s^5 + 126r^4s^4t^2 + 455r^4s^4t + 126r^4s^3t^3 - 546r^4s^3t^2 + 126r^4s^2t^4 - 546r^4s^2t^3 - 147r^4st^5 + 455r^4st^4 + 35r^4t^6 - 91r^4t^5 + 35r^3s^7 - 147r^3s^6t - 91r^3s^6 + 126r^3s^5t^2 + 455r^3s^5t + 126r^3s^4t^3 - 546r^3s^4t^2 + 126r^3s^3t^4 - 546r^3s^3t^3 + 126r^3s^2t^5 - 546r^3s^2t^4 - 147r^3st^6 + 455r^3st^5 + 35r^3t^7 - 91r^3t^6 + 35r^2s^8 - 147r^2s^7t - 91r^2s^7 + 126r^2s^6t^2 + 455r^2s^6t + 126r^2s^5t^3 - 546r^2s^5t^2 + 126r^2s^4t^4 - 546r^2s^4t^3 + 126r^2s^3t^5 - 546r^2s^3t^4 + 126r^2s^2t^6 - 546r^2s^2t^5 - 147r^2st^7 + 455r^2st^6 + 35r^2t^8 - 91r^2t^7 - 95rs^9 + 295rs^8t + 195rs^8 - 147rs^7t^2 - 689rs^7t - 147rs^6t^3 + 455rs^6t^2 - 147rs^5t^4 + 455rs^5t^3 - 147rs^4t^5 + 455rs^4t^4 - 147rs^3t^6 + 455rs^3t^5 - 147rs^2t^7 + 455rs^2t^6 + 295rst^8 - 689rst^7 - 95rt^9 + 195rt^8 + 35s^{10} - 95s^9t - 65s^9 + 35s^8t^2 + 195s^8t + 35s^7t^3 - 91s^7t^2 + 35s^6t^4 - 91s^6t^3 + 35s^5t^5 - 91s^5t^4 + 35s^4t^6 - 91s^4t^5 + 35s^3t^7 - 91s^3t^6 + 35s^2t^8 - 91s^2t^7 - 95st^9 + 195st^8 + 35t^{10} - 65t^9))/(2162160(r - 1)^2(s - 1)^2(t - 1)^2) - ((x - x_n)^{12}(2r + 2s + 2t + 1))/(11880h^7(r - 1)^2(s - 1)^2(t - 1)^2) - ((x - x_n)^8(2r^2s^2t + r^2s^2 + 2r^2st^2 + 4r^2st + r^2t^2 + 2rs^2t^2 + 4rs^2t + 4rst^2 + s^2t^2))/(1680h^3(r - 1)^2(s - 1)^2(t - 1)^2) + ((x - x_n)^{11}(r^2 + 4rs + 4rt + 2r + s^2 + 4st + 2s + t^2 + 2t))/(7920h^6(r - 1)^2(s - 1)^2(t - 1)^2) - (r^2s^2t^2(x - x_n)^6)/(360h(r - 1)^2(s - 1)^2(t - 1)^2) + (rst(x - x_n)^7(2rs + 2rt + 2st + rst))/(840h^2(r - 1)^2(s - 1)^2(t - 1)^2) - (h^4rst(x - x_n)(35r^9 - 95r^8s - 95r^8t - 65r^8 + 35r^7s^2 + 295r^7st + 195r^7s + 35r^7t^2 + 195r^7t + 35r^6s^3 - 147r^6s^2t - 91r^6s^2 - 147r^6st^2 - 689r^6st + 35r^6t^3 - 91r^6t^2 + 35r^5s^4 - 147r^5s^3t - 91r^5s^3 + 126r^5s^2t^2 + 455r^5s^2t - 147r^5st^3 + 455r^5st^2 + 35r^5t^4 - 91r^5t^3 + 35r^4s^5 - 147r^4s^4t - 91r^4s^4 + 126r^4s^3t^2 + 455r^4s^3t + 126r^4s^2t^3 - 546r^4s^2t^2 - 147r^4st^4 + 455r^4st^3 + 35r^4t^5 - 91r^4t^4 + 35r^3s^6 - 147r^3s^5t - 91r^3s^5 + 126r^3s^4t^2 + 455r^3s^4t + 126r^3s^3t^3 - 546r^3s^3t^2 + 126r^3s^2t^4 - 546r^3s^2t^3 - 147r^3st^5 + 455r^3st^4 + 35r^3t^6 - 91r^3t^5 + 35r^2s^7 - 147r^2s^6t - 91r^2s^6 + 126r^2s^5t^2 + 455r^2s^5t + 126r^2s^4t^3 - 546r^2s^4t^2 + 126r^2s^3t^4 - 546r^2s^3t^3 + 126r^2s^2t^5 - 546r^2s^2t^4 - 147r^2st^6 + 455r^2st^5 + 35r^2t^7 - 91r^2t^6 - 95rs^8 + 295rs^7t + 195rs^7 - 147rs^6t^2 - 689rs^6t - 147rs^5t^3 + 455rs^5t^2 - 147rs^4t^4 + 455rs^4t^3 - 147rs^3t^5 + 455rs^3t^4 - 147rs^2t^6 + 455rs^2t^5 + 295rst^7 - 689rst^6 - 95rt^8 + 195rt^7 + 35s^9 - 95s^8t - 65s^8 + 35s^7t^2 + 195s^7t + 35s^6t^3 - 91s^6t^2 + 35s^5t^4 - 91s^5t^3 + 35s^4t^5 - 91s^4t^4 + 35s^3t^6 - 91s^3t^5 + 35s^2t^7 - 91s^2t^6 - 95st^8 + 195st^7 + 35t^9 - 65t^8))/(2162160(r - 1)^2(s - 1)^2(t - 1)^2).
    $\\\\
    \textbf{Appendix II}
    \begin{small}
        \begin{eqnarray*} 
            B^{[0]}_{116}&=&\frac{-h^4r^4}{2162160s^3t^3}\left.(-70r^7st - 70r^7s - 70r^7t + 260r^6s^2t + 260r^6s^2 + 260r^6st^2 + 645r^6st + 260r^6s\right.\\&& \left. + 260r^6t^2 + 260r^6t - 260r^5s^3t - 260r^5s^3 - 1040r^5s^2t^2 - 1820r^5s^2t - 1040r^5s^2 - 260r^5st^3 -\right.\\&& \left. 1820r^5st^2 - 1820r^5st - 260r^5s - 260r^5t^3 - 1040r^5t^2 - 260r^5t + 1144r^4s^3t^2 + 1742r^4s^3t +\right.\\&& \left. 1144r^4s^3 + 1144r^4s^2t^3 + 4680r^4s^2t^2 + 4680r^4s^2t + 1144r^4s^2 + 1742r^4st^3 + 4680r^4st^2 + 1742\right.\\&& \left.r^4st + 1144r^4t^3 + 1144r^4t^2 - 1430r^3s^3t^3 - 4576r^3s^3t^2 - 4576r^3s^3t - 1430r^3s^3 - 4576r^3s^2t^3\right.\\&& \left. - 6864r^3s^2t^2 - 4576r^3s^2t - 4576r^3st^3 - 4576r^3st^2 - 1430r^3t^3 + 5005r^2s^3t^3 + 2860r^2s^3t^2 +\right.\\&& \left. 5005r^2s^3t + 2860r^2s^2t^3 + 2860r^2s^2t^2 + 5005r^2st^3 + 8580rs^3t^3 + 8580rs^3t^2 + 8580rs^2t^3 -\right.\\&& \left. 77220s^3t^3)\right.,\\	
            B^{[0]}_{216}&=&\frac{-h^4s^4}{2162160r^3t^3}\left. (-260r^3s^5t - 260r^3s^5 + 1144r^3s^4t^2 + 1742r^3s^4t + 1144r^3s^4 - 1430r^3s^3t^3 - 4576\right.\\&& \left.r^3s^3t^2 - 4576r^3s^3t - 1430r^3s^3 + 5005r^3s^2t^3 + 2860r^3s^2t^2 + 5005r^3s^2t + 8580r^3st^3 + 8580r^3st^2\right.\\&& \left. - 77220r^3t^3 + 260r^2s^6t + 260r^2s^6 - 1040r^2s^5t^2 - 1820r^2s^5t - 1040r^2s^5 + 1144r^2s^4t^3 + 4680r^2\right.\\&& \left.s^4t^2 + 4680r^2s^4t + 1144r^2s^4 - 4576r^2s^3t^3 - 6864r^2s^3t^2 - 4576r^2s^3t + 2860r^2s^2t^3 + 2860r^2s^2t^2\right.\\&& \left. + 8580r^2st^3 - 70rs^7t - 70rs^7 + 260rs^6t^2 + 645rs^6t + 260rs^6 - 260rs^5t^3 - 1820rs^5t^2 - 1820rs^5\right.\\&& \left.t - 260rs^5 + 1742rs^4t^3 + 4680rs^4t^2 + 1742rs^4t - 4576rs^3t^3 - 4576rs^3t^2 + 5005rs^2t^3 - 70s^7t + \right.\\&& \left.260s^6t^2 + 260s^6t - 260s^5t^3 - 1040s^5t^2 - 260s^5t + 1144s^4t^3 + 1144s^4t^2 - 1430s^3t^3)\right.,\\
            B^{[0]}_{316}&=&\frac{-h^4t^4}{2162160r^3s^3}\left.(-1430r^3s^3t^3 + 5005r^3s^3t^2 + 8580r^3s^3t - 77220r^3s^3 + 1144r^3s^2t^4 - 4576r^3s^2t^3 +\right.\\&& \left. 2860r^3s^2t^2 + 8580r^3s^2t - 260r^3st^5 + 1742r^3st^4 - 4576r^3st^3 + 5005r^3st^2 - 260r^3t^5 + 1144r^3t^4\right.\\&& \left. - 1430r^3t^3 + 1144r^2s^3t^4 - 4576r^2s^3t^3 + 2860r^2s^3t^2 + 8580r^2s^3t - 1040r^2s^2t^5 + 4680r^2s^2t^4 -\right.\\&& \left. 6864r^2s^2t^3 + 2860r^2s^2t^2 + 260r^2st^6 - 1820r^2st^5 + 4680r^2st^4 - 4576r^2st^3 + 260r^2t^6 - 1040r^2t^5\right.\\&& \left. + 1144r^2t^4 - 260rs^3t^5 + 1742rs^3t^4 - 4576rs^3t^3 + 5005rs^3t^2 + 260rs^2t^6 - 1820rs^2t^5 + 4680rs^2\right.\\&& \left.t^4 - 4576rs^2t^3 - 70rst^7 + 645rst^6 - 1820rst^5 + 1742rst^4 - 70rt^7 + 260rt^6 - 260rt^5 - 260s^3t^5\right.\\&& \left. + 1144s^3t^4 - 1430s^3t^3 + 260s^2t^6 - 1040s^2t^5 + 1144s^2t^4 - 70st^7 + 260st^6 - 260st^5)\right.,\\
            B^{[0]}_{416}&=&\frac{-h^4}{2162160r^3s^3t^3}\left.(-77220r^3s^3t^3 + 8580r^3s^3t^2 + 5005r^3s^3t - 1430r^3s^3 + 8580r^3s^2t^3 + 2860r^3s^2t^2\right.\\&& \left. - 4576r^3s^2t + 1144r^3s^2 + 5005r^3st^3 - 4576r^3st^2 + 1742r^3st - 260r^3s - 1430r^3t^3 + 1144r^3t^2 -\right.\\&& \left. 260r^3t + 8580r^2s^3t^3 + 2860r^2s^3t^2 - 4576r^2s^3t + 1144r^2s^3 + 2860r^2s^2t^3 - 6864r^2s^2t^2 + 4680r^2\right.\\&& \left.s^2t - 1040r^2s^2 - 4576r^2st^3 + 4680r^2st^2 - 1820r^2st + 260r^2s + 1144r^2t^3 - 1040r^2t^2 + 260r^2t +\right.\\&& \left. 5005rs^3t^3 - 4576rs^3t^2 + 1742rs^3t - 260rs^3 - 4576rs^2t^3 + 4680rs^2t^2 - 1820rs^2t + 260rs^2 + \right.\\&& \left.1742rst^3 - 1820rst^2 + 645rst - 70rs - 260rt^3 + 260rt^2 - 70rt - 1430s^3t^3 + 1144s^3t^2 - 260s^3t\right.\\&& \left. + 1144s^2t^3 - 1040s^2t^2 + 260s^2t - 260st^3 + 260st^2 - 70st)\right.,\\
            B^{[0]}_{516}&=&\frac{-h^3r^3}{27720s^3t^3}\left.(-7r^7st - 7r^7s - 7r^7t + 24r^6s^2t + 24r^6s^2 + 24r^6st^2 + 59r^6st + 24r^6s + 24r^6t^2 + 24\right.\\&& \left.r^6t - 22r^5s^3t - 22r^5s^3 - 88r^5s^2t^2 - 152r^5s^2t - 88r^5s^2 - 22r^5st^3 - 152r^5st^2 - 152r^5st - 22r^5s\right.\\&& \left. - 22r^5t^3 - 88r^5t^2 - 22r^5t + 88r^4s^3t^2 + 132r^4s^3t + 88r^4s^3 + 88r^4s^2t^3 + 352r^4s^2t^2 + 352r^4s^2t + \right.\\&& \left.88r^4s^2 + 132r^4st^3 + 352r^4st^2 + 132r^4st + 88r^4t^3 + 88r^4t^2 - 99r^3s^3t^3 - 308r^3s^3t^2 - 308r^3s^3t - \right.\\&& \left.99r^3s^3 - 308r^3s^2t^3 - 440r^3s^2t^2 - 308r^3s^2t - 308r^3st^3 - 308r^3st^2 - 99r^3t^3 + 297r^2s^3t^3 + 132\right.\\&& \left.r^2s^3t^2 + 297r^2s^3t + 132r^2s^2t^3 + 132r^2s^2t^2 + 297r^2st^3 + 528rs^3t^3 + 528rs^3t^2 + 528rs^2t^3 - \right.\\&& \left.3696s^3t^3)\right.,\\
        \end{eqnarray*}
        \begin{eqnarray*}
            B^{[0]}_{616}&=&\frac{-h^3s^3}{27720r^3t^3}\left.(-22r^3s^5t - 22r^3s^5 + 88r^3s^4t^2 + 132r^3s^4t + 88r^3s^4 - 99r^3s^3t^3 - 308r^3s^3t^2 - 308r^3\right.\\&& \left.s^3t - 99r^3s^3 + 297r^3s^2t^3 + 132r^3s^2t^2 + 297r^3s^2t + 528r^3st^3 + 528r^3st^2 - 3696r^3t^3 + 24r^2s^6t +\right.\\&& \left. 24r^2s^6 - 88r^2s^5t^2 - 152r^2s^5t - 88r^2s^5 + 88r^2s^4t^3 + 352r^2s^4t^2 + 352r^2s^4t + 88r^2s^4 - 308r^2s^3t^3\right.\\&& \left. - 440r^2s^3t^2 - 308r^2s^3t + 132r^2s^2t^3 + 132r^2s^2t^2 + 528r^2st^3 - 7rs^7t - 7rs^7 + 24rs^6t^2 + 59rs^6t + \right.\\&& \left.24rs^6 - 22rs^5t^3 - 152rs^5t^2 - 152rs^5t - 22rs^5 + 132rs^4t^3 + 352rs^4t^2 + 132rs^4t - 308rs^3t^3 - 308\right.\\&& \left.rs^3t^2 + 297rs^2t^3 - 7s^7t + 24s^6t^2 + 24s^6t - 22s^5t^3 - 88s^5t^2 - 22s^5t + 88s^4t^3 + 88s^4t^2 - 99s^3t^3)\right.,\\
            B^{[0]}_{716}&=&\frac{-h^3t^3}{27720r^3s^3}\left.(-99r^3s^3t^3 + 297r^3s^3t^2 + 528r^3s^3t - 3696r^3s^3 + 88r^3s^2t^4 - 308r^3s^2t^3 + 132r^3s^2t^2\right.\\&& \left. + 528r^3s^2t - 22r^3st^5 + 132r^3st^4 - 308r^3st^3 + 297r^3st^2 - 22r^3t^5 + 88r^3t^4 - 99r^3t^3 + 88r^2s^3t^4 \right.\\&& \left.- 308r^2s^3t^3 + 132r^2s^3t^2 + 528r^2s^3t - 88r^2s^2t^5 + 352r^2s^2t^4 - 440r^2s^2t^3 + 132r^2s^2t^2 + 24r^2st^6\right.\\&& \left. - 152r^2st^5 + 352r^2st^4 - 308r^2st^3 + 24r^2t^6 - 88r^2t^5 + 88r^2t^4 - 22rs^3t^5 + 132rs^3t^4 - 308rs^3t^3\right.\\&& \left. + 297rs^3t^2 + 24rs^2t^6 - 152rs^2t^5 + 352rs^2t^4 - 308rs^2t^3 - 7rst^7 + 59rst^6 - 152rst^5 + 132rst^4 \right.\\&& \left.- 7rt^7 + 24rt^6 - 22rt^5 - 22s^3t^5 + 88s^3t^4 - 99s^3t^3 + 24s^2t^6 - 88s^2t^5 + 88s^2t^4 - 7st^7 + 24st^6\right.\\&& \left.- 22st^5)\right.,\\
            B^{[0]}_{816}&=&\frac{-h^3}{27720r^3s^3t^3}\left.(-3696r^3s^3t^3 + 528r^3s^3t^2 + 297r^3s^3t - 99r^3s^3 + 528r^3s^2t^3 + 132r^3s^2t^2 - 308r^3\right.\\&& \left.s^2t + 88r^3s^2 + 297r^3st^3 - 308r^3st^2 + 132r^3st - 22r^3s - 99r^3t^3 + 88r^3t^2 - 22r^3t + 528r^2s^3t^3\right.\\&& \left. + 132r^2s^3t^2 - 308r^2s^3t + 88r^2s^3 + 132r^2s^2t^3 - 440r^2s^2t^2 + 352r^2s^2t - 88r^2s^2 - 308r^2st^3 +\right.\\&& \left. 352r^2st^2 - 152r^2st + 24r^2s + 88r^2t^3 - 88r^2t^2 + 24r^2t + 297rs^3t^3 - 308rs^3t^2 + 132rs^3t - 22\right.\\&& \left.rs^3 - 308rs^2t^3 + 352rs^2t^2 - 152rs^2t + 24rs^2 + 132rst^3 - 152rst^2 + 59rst - 7rs - 22rt^3 + 24\right.\\&& \left.rt^2 - 7rt - 99s^3t^3 + 88s^3t^2 - 22s^3t + 88s^2t^3 - 88s^2t^2 + 24s^2t - 22st^3 + 24st^2 - 7st)\right.,\\
            B^{[0]}_{916}&=&\frac{-h^2r^2}{27720s^3t^3}\left.(-42r^7st - 42r^7s - 42r^7t + 132r^6s^2t + 132r^6s^2 + 132r^6st^2 + 321r^6st + 132r^6s + \right.\\&& \left.132r^6t^2 + 132r^6t - 110r^5s^3t - 110r^5s^3 - 440r^5s^2t^2 - 748r^5s^2t - 440r^5s^2 - 110r^5st^3 - 748r^5\right.\\&& \left.st^2 - 748r^5st - 110r^5s - 110r^5t^3 - 440r^5t^2 - 110r^5t + 396r^4s^3t^2 + 583r^4s^3t + 396r^4s^3 + 396\right.\\&& \left.r^4s^2t^3 + 1540r^4s^2t^2 + 1540r^4s^2t + 396r^4s^2 + 583r^4st^3 + 1540r^4st^2 + 583r^4st + 396r^4t^3 + 396\right.\\&& \left.r^4t^2 - 396r^3s^3t^3 - 1188r^3s^3t^2 - 1188r^3s^3t - 396r^3s^3 - 1188r^3s^2t^3 - 1584r^3s^2t^2 - 1188r^3s^2t \right.\\&& \left.- 1188r^3st^3 - 1188r^3st^2 - 396r^3t^3 + 990r^2s^3t^3 + 264r^2s^3t^2 + 990r^2s^3t + 264r^2s^2t^3 + 264r^2s^2\right.\\&& \left.t^2 + 990r^2st^3 + 1848rs^3t^3 + 1848rs^3t^2 + 1848rs^2t^3 - 9702s^3t^3)\right.,\\
            B^{[0]}_{1016}&=&\frac{-h^2s^2}{27720r^3t^3}\left.(-110r^3s^5t - 110r^3s^5 + 396r^3s^4t^2 + 583r^3s^4t + 396r^3s^4 - 396r^3s^3t^3 - 1188r^3s^3t^2\right.\\&& \left. - 1188r^3s^3t - 396r^3s^3 + 990r^3s^2t^3 + 264r^3s^2t^2 + 990r^3s^2t + 1848r^3st^3 + 1848r^3st^2 - 9702r^3\right.\\&& \left.t^3 + 132r^2s^6t + 132r^2s^6 - 440r^2s^5t^2 - 748r^2s^5t - 440r^2s^5 + 396r^2s^4t^3 + 1540r^2s^4t^2 + 1540r^2\right.\\&& \left.s^4t + 396r^2s^4 - 1188r^2s^3t^3 - 1584r^2s^3t^2 - 1188r^2s^3t + 264r^2s^2t^3 + 264r^2s^2t^2 + 1848r^2st^3 - \right.\\&& \left.42rs^7t - 42rs^7 + 132rs^6t^2 + 321rs^6t + 132rs^6 - 110rs^5t^3 - 748rs^5t^2 - 748rs^5t - 110rs^5 + 583\right.\\&& \left.rs^4t^3 + 1540rs^4t^2 + 583rs^4t - 1188rs^3t^3 - 1188rs^3t^2 + 990rs^2t^3 - 42s^7t + 132s^6t^2 + 132s^6t -\right.\\&& \left. 110s^5t^3 - 440s^5t^2 - 110s^5t + 396s^4t^3 + 396s^4t^2 - 396s^3t^3)\right.,\\
            B^{[0]}_{1116}&=&\frac{-h^2t^2}{27720r^3s^3}\left.   (- 396r^3s^3t^3 + 990r^3s^3t^2 + 1848r^3s^3t - 9702r^3s^3 + 396r^3s^2t^4 - 1188r^3s^2t^3 + 264r^3\right.\\&& \left.s^2t^2 + 1848r^3s^2t - 110r^3st^5 + 583r^3st^4 - 1188r^3st^3 + 990r^3st^2 - 110r^3t^5 + 396r^3t^4 - 396r^3t^3\right.\\&& \left. + 396r^2s^3t^4 - 1188r^2s^3t^3 + 264r^2s^3t^2 + 1848r^2s^3t - 440r^2s^2t^5 + 1540r^2s^2t^4 - 1584r^2s^2t^3 + 264\right.\\&& \left.r^2s^2t^2 + 132r^2st^6 - 748r^2st^5 + 1540r^2st^4 - 1188r^2st^3 + 132r^2t^6 - 440r^2t^5 + 396r^2t^4 - 110rs^3\right.\\&& \left.t^5 + 583rs^3t^4 - 1188rs^3t^3 + 990rs^3t^2 + 132rs^2t^6 - 748rs^2t^5 + 1540rs^2t^4 - 1188rs^2t^3 - 42rst^7\right.\\&& \left. + 321rst^6 - 748rst^5 + 583rst^4 - 42rt^7 + 132rt^6 - 110rt^5 - 110s^3t^5 + 396s^3t^4 - 396s^3t^3 + 132\right.\\&& \left.s^2t^6 - 440s^2t^5 + 396s^2t^4 - 42st^7 + 132st^6 - 110st^5)\right.,\\
        \end{eqnarray*}
        \begin{eqnarray*}
            B^{[0]}_{1216}&=&\frac{-h^2}{27720r^3s^3t^3}\left.(- 9702r^3s^3t^3 + 1848r^3s^3t^2 + 990r^3s^3t - 396r^3s^3 + 1848r^3s^2t^3 + 264r^3s^2t^2 - 1188\right.\\&& \left.r^3s^2t + 396r^3s^2 + 990r^3st^3 - 1188r^3st^2 + 583r^3st - 110r^3s - 396r^3t^3 + 396r^3t^2 - 110r^3t + 1848\right.\\&& \left.r^2s^3t^3 + 264r^2s^3t^2 - 1188r^2s^3t + 396r^2s^3 + 264r^2s^2t^3 - 1584r^2s^2t^2 + 1540r^2s^2t - 440r^2s^2 - 1188\right.\\&& \left.r^2st^3 + 1540r^2st^2 - 748r^2st + 132r^2s + 396r^2t^3 - 440r^2t^2 + 132r^2t + 990rs^3t^3 - 1188rs^3t^2 + 583\right.\\&& \left.rs^3t - 110rs^3 - 1188rs^2t^3 + 1540rs^2t^2 - 748rs^2t + 132rs^2 + 583rst^3 - 748rst^2 + 321rst - 42rs -\right.\\&& \left. 110rt^3 + 132rt^2 - 42rt - 396s^3t^3 + 396s^3t^2 - 110s^3t + 396s^2t^3 - 440s^2t^2 + 132s^2t - 110st^3 + 132\right.\\&& \left.st^2 - 42st)\right.,\\
            B^{[0]}_{1316}&=&\frac{hr}{1260s^3t^3}\left.  (7r^7st + 7r^7s + 7r^7t - 20r^6s^2t - 20r^6s^2 - 20r^6st^2 - 48r^6st - 20r^6s - 20r^6t^2 - 20r^6t + \right.\\&& \left.15r^5s^3t + 15r^5s^3 + 60r^5s^2t^2 + 100r^5s^2t + 60r^5s^2 + 15r^5st^3 + 100r^5st^2 + 100r^5st + 15r^5s + 15r^5\right.\\&& \left.t^3 + 60r^5t^2 + 15r^5t - 48r^4s^3t^2 - 69r^4s^3t - 48r^4s^3 - 48r^4s^2t^3 - 180r^4s^2t^2 - 180r^4s^2t - 48r^4s^2\right.\\
            && \left. - 69r^4st^3 - 180r^4st^2 - 69r^4st - 48r^4t^3 - 48r^4t^2 + 42r^3s^3t^3 + 120r^3s^3t^2 + 120r^3s^3t + 42r^3s^3 \right.\\&& \left.+ 120r^3s^2t^3 + 144r^3s^2t^2 + 120r^3s^2t + 120r^3st^3 + 120r^3st^2 + 42r^3t^3 - 84r^2s^3t^3 - 84r^2s^3t - 84\right.\\&& \left.r^2st^3 - 168rs^3t^3 - 168rs^3t^2 - 168rs^2t^3 + 630s^3t^3)\right.,\\
            B^{[0]}_{1416}&=&\frac{hs}{1260r^3t^3}\left.  (15r^3s^5t + 15r^3s^5 - 48r^3s^4t^2 - 69r^3s^4t - 48r^3s^4 + 42r^3s^3t^3 + 120r^3s^3t^2 + 120r^3s^3t\right.\\&& \left. + 42r^3s^3 - 84r^3s^2t^3 - 84r^3s^2t - 168r^3st^3 - 168r^3st^2 + 630r^3t^3 - 20r^2s^6t - 20r^2s^6 + 60r^2s^5t^2\right.\\&& \left. + 100r^2s^5t + 60r^2s^5 - 48r^2s^4t^3 - 180r^2s^4t^2 - 180r^2s^4t - 48r^2s^4 + 120r^2s^3t^3 + 144r^2s^3t^2 + \right.\\&& \left.120r^2s^3t - 168r^2st^3 + 7rs^7t + 7rs^7 - 20rs^6t^2 - 48rs^6t - 20rs^6 + 15rs^5t^3 + 100rs^5t^2 + 100rs^5\right.\\&& \left.t + 15rs^5 - 69rs^4t^3 - 180rs^4t^2 - 69rs^4t + 120rs^3t^3 + 120rs^3t^2 - 84rs^2t^3 + 7s^7t - 20s^6t^2 - 20\right.\\&& \left.s^6t + 15s^5t^3 + 60s^5t^2 + 15s^5t - 48s^4t^3 - 48s^4t^2 + 42s^3t^3)\right.,\\
            B^{[0]}_{1516}&=&\frac{ht}{1260r^3s^3}\left.  (42r^3s^3t^3 - 84r^3s^3t^2 - 168r^3s^3t + 630r^3s^3 - 48r^3s^2t^4 + 120r^3s^2t^3 - 168r^3s^2t + 15r^3\right.\\&& \left.st^5 - 69r^3st^4 + 120r^3st^3 - 84r^3st^2 + 15r^3t^5 - 48r^3t^4 + 42r^3t^3 - 48r^2s^3t^4 + 120r^2s^3t^3 - 168r^2\right.\\&& \left.s^3t + 60r^2s^2t^5 - 180r^2s^2t^4 + 144r^2s^2t^3 - 20r^2st^6 + 100r^2st^5 - 180r^2st^4 + 120r^2st^3 - 20r^2t^6 +\right.\\&& \left. 60r^2t^5 - 48r^2t^4 + 15rs^3t^5 - 69rs^3t^4 + 120rs^3t^3 - 84rs^3t^2 - 20rs^2t^6 + 100rs^2t^5 - 180rs^2t^4 + \right.\\&& \left.120rs^2t^3 + 7rst^7 - 48rst^6 + 100rst^5 - 69rst^4 + 7rt^7 - 20rt^6 + 15rt^5 + 15s^3t^5 - 48s^3t^4 + 42s^3\right.\\&& \left.t^3 - 20s^2t^6 + 60s^2t^5 - 48s^2t^4 + 7st^7 - 20st^6 + 15st^5)\right.,\\
            B^{[0]}_{1616}&=&\frac{h}{1260r^3s^3t^3}\left.(630r^3s^3t^3 - 168r^3s^3t^2 - 84r^3s^3t + 42r^3s^3 - 168r^3s^2t^3 + 120r^3s^2t - 48r^3s^2 - 84r^3\right.\\&& \left.st^3 + 120r^3st^2 - 69r^3st + 15r^3s + 42r^3t^3 - 48r^3t^2 + 15r^3t - 168r^2s^3t^3 + 120r^2s^3t - 48r^2s^3 +\right.\\&& \left. 144r^2s^2t^2 - 180r^2s^2t + 60r^2s^2 + 120r^2st^3 - 180r^2st^2 + 100r^2st - 20r^2s - 48r^2t^3 + 60r^2t^2 - 20\right.\\&& \left.r^2t - 84rs^3t^3 + 120rs^3t^2 - 69rs^3t + 15rs^3 + 120rs^2t^3 - 180rs^2t^2 + 100rs^2t - 20rs^2 - 69rst^3 + \right.\\&& \left.100rst^2 - 48rst + 7rs + 15rt^3 - 20rt^2 + 7rt + 42s^3t^3 - 48s^3t^2 + 15s^3t - 48s^2t^3 + 60s^2t^2 - 20s^2\right.\\&& \left.t + 15st^3 - 20st^2 + 7st)\right..\\
            B^{[1]}_{11}&=&\frac{h^4r^4}{2162160(r - s)^3(r - t)^3(r - 1)^3}\left. (630r^9 - 2520r^8s - 2520r^8t - 2520r^8 + 3315r^7s^2 + 10390r^7st +\right.\\&& \left. 10390r^7s + 3315r^7t^2 + 10390r^7t + 3315r^7 - 1365r^6s^3 - 14105r^6s^2t - 14105r^6s^2 - 14105r^6st^2 -\right.\\&& \left. 44520r^6st - 14105r^6s - 1365r^6t^3 - 14105r^6t^2 - 14105r^6t - 1365r^6 + 5915r^5s^3t + 5915r^5s^3 +\right.\\&& \left. 19799r^5s^2t^2 + 63011r^5s^2t + 19799r^5s^2 + 5915r^5st^3 + 63011r^5st^2 + 63011r^5st + 5915r^5s + 5915\right.\\&& \left.r^5t^3 + 19799r^5t^2 + 5915r^5t - 8437r^4s^3t^2 - 27053r^4s^3t - 8437r^4s^3 - 8437r^4s^2t^3 - 93483r^4s^2t^2 - \right.\\&& \left.93483r^4s^2t - 8437r^4s^2 - 27053r^4st^3 - 93483r^4st^2 - 27053r^4st - 8437r^4t^3 - 8437r^4t^2 + 3575r^3\right.\\&& \left.s^3t^3 + 41041r^3s^3t^2 + 41041r^3s^3t + 3575r^3s^3 + 41041r^3s^2t^3 + 148434r^3s^2t^2 + 41041r^3s^2t + 41041\right.\\&& \left.r^3st^3 + 41041r^3st^2 + 3575r^3t^3 - 17875r^2s^3t^3 - 67210r^2s^3t^2 - 17875r^2s^3t - 67210r^2s^2t^3 - 67210\right.\\&& \left.r^2s^2t^2 - 17875r^2st^3 + 30030rs^3t^3 + 30030rs^3t^2 + 30030rs^2t^3 - 12870s^3t^3)\right.,\\
        \end{eqnarray*}
        \begin{eqnarray*}
            B^{[1]}_{21}&=&\frac{-h^4s^8}{2162160r^3(r - s)^3(r - t)^3(r - 1)^3}\left.  (- 585r^4s^4 + 2340r^4s^3t + 2340r^4s^3 - 2574r^4s^2t^2 - 10296r^4s^2\right.\\&& \left.t - 2574r^4s^2 + 12870r^4st^2 + 12870r^4st - 19305r^4t^2 + 735r^3s^5 - 2405r^3s^4t - 2405r^3s^4 + 1222r^3\right.\\&& \left.s^3t^2 + 8528r^3s^3t + 1222r^3s^3 + 2002r^3s^2t^3 - 4576r^3s^2t^2 - 4576r^3s^2t + 2002r^3s^2 - 10010r^3st^3 + \right.\\&& \left.715r^3st^2 - 10010r^3st + 15015r^3t^3 + 15015r^3t^2 - 210r^2s^6 + 245r^2s^5t + 245r^2s^5 + 1300r^2s^4t^2 +\right.\\&& \left. 715r^2s^4t + 1300r^2s^4 - 2210r^2s^3t^3 - 6318r^2s^3t^2 - 6318r^2s^3t - 2210r^2s^3 + 9152r^2s^2t^3 + 11154r^2\right.\\&& \left.s^2t^2 + 9152r^2s^2t - 7865r^2st^3 - 7865r^2st^2 - 10725r^2t^3 + 140rs^6t + 140rs^6 - 520rs^5t^2 - 705rs^5t\right.\\&& \left. - 520rs^5 + 520rs^4t^3 + 1300rs^4t^2 + 1300rs^4t + 520rs^4 - 910rs^3t^3 + 936rs^3t^2 - 910rs^3t - 3718r\right.\\&& \left.s^2t^3 - 3718rs^2t^2 + 9295rst^3 - 70s^6t + 260s^5t^2 + 260s^5t - 260s^4t^3 - 1040s^4t^2 - 260s^4t + 1144s^3\right.\\&& \left.t^3 + 1144s^3t^2 - 1430s^2t^3)\right.,\\
            B^{[1]}_{31}&=&\frac{-h^4t^8}{2162160r^3(r - s)^3(r - t)^3(r - 1)^3}\left.   (- 2574r^4s^2t^2 + 12870r^4s^2t - 19305r^4s^2 + 2340r^4st^3 - 10296\right.\\&& \left.r^4st^2 + 12870r^4st - 585r^4t^4 + 2340r^4t^3 - 2574r^4t^2 + 2002r^3s^3t^2 - 10010r^3s^3t + 15015r^3s^3 + 1222\right.\\&& \left.r^3s^2t^3 - 4576r^3s^2t^2 + 715r^3s^2t + 15015r^3s^2 - 2405r^3st^4 + 8528r^3st^3 - 4576r^3st^2 - 10010r^3st +\right.\\&& \left. 735r^3t^5 - 2405r^3t^4 + 1222r^3t^3 + 2002r^3t^2 - 2210r^2s^3t^3 + 9152r^2s^3t^2 - 7865r^2s^3t - 10725r^2s^3 +\right.\\&& \left. 1300r^2s^2t^4 - 6318r^2s^2t^3 + 11154r^2s^2t^2 - 7865r^2s^2t + 245r^2st^5 + 715r^2st^4 - 6318r^2st^3 + 9152r^2\right.\\
            && \left.st^2 - 210r^2t^6 + 245r^2t^5 + 1300r^2t^4 - 2210r^2t^3 + 520rs^3t^4 - 910rs^3t^3 - 3718rs^3t^2 + 9295rs^3t\right.\\&& \left. - 520rs^2t^5 + 1300rs^2t^4 + 936rs^2t^3 - 3718rs^2t^2 + 140rst^6 - 705rst^5 + 1300rst^4 - 910rst^3 + \right.\\&& \left.140rt^6 - 520rt^5 + 520rt^4 - 260s^3t^4 + 1144s^3t^3 - 1430s^3t^2 + 260s^2t^5 - 1040s^2t^4 + 1144s^2t^3 -\right.\\&& \left. 70st^6 + 260st^5 - 260st^4)\right.,\\
            B^{[1]}_{41}&=&\frac{-h^4}{2162160r^3(r - s)^3(r - t)^3(r - 1)^3}\left.   (- 19305r^4s^2t^2 + 12870r^4s^2t - 2574r^4s^2 + 12870r^4st^2 - \right.\\&& \left.10296r^4st + 2340r^4s - 2574r^4t^2 + 2340r^4t - 585r^4 + 15015r^3s^3t^2 - 10010r^3s^3t + 2002r^3s^3 + \right.\\&& \left.15015r^3s^2t^3 + 715r^3s^2t^2 - 4576r^3s^2t + 1222r^3s^2 - 10010r^3st^3 - 4576r^3st^2 + 8528r^3st - 2405\right.\\&& \left.r^3s + 2002r^3t^3 + 1222r^3t^2 - 2405r^3t + 735r^3 - 10725r^2s^3t^3 - 7865r^2s^3t^2 + 9152r^2s^3t - 2210\right.\\&& \left.r^2s^3 - 7865r^2s^2t^3 + 11154r^2s^2t^2 - 6318r^2s^2t + 1300r^2s^2 + 9152r^2st^3 - 6318r^2st^2 + 715r^2st + \right.\\&& \left.245r^2s - 2210r^2t^3 + 1300r^2t^2 + 245r^2t - 210r^2 + 9295rs^3t^3 - 3718rs^3t^2 - 910rs^3t + 520rs^3 -\right.\\&& \left. 3718rs^2t^3 + 936rs^2t^2 + 1300rs^2t - 520rs^2 - 910rst^3 + 1300rst^2 - 705rst + 140rs + 520rt^3 - \right.\\&& \left.520rt^2 + 140rt - 1430s^3t^3 + 1144s^3t^2 - 260s^3t + 1144s^2t^3 - 1040s^2t^2 + 260s^2t - 260st^3 +\right.\\&& \left. 260st^2 - 70st)\right.,\\
            B^{[1]}_{51}&=&\frac{h^3r^3}{27720(r - s)^3(r - t)^3(r - 1)^3}\left.  (84r^9 - 315r^8s - 315r^8t - 315r^8 + 390r^7s^2 + 1210r^7st + 1210r^7\right.\\&& \left.s + 390r^7t^2 + 1210r^7t + 390r^7 - 154r^6s^3 - 1536r^6s^2t - 1536r^6s^2 - 1536r^6st^2 - 4793r^6st - 1536\right.\\&& \left.r^6s - 154r^6t^3 - 1536r^6t^2 - 1536r^6t - 154r^6 + 616r^5s^3t + 616r^5s^3 + 2002r^5s^2t^2 + 6290r^5s^2t +\right.\\&& \left. 2002r^5s^2 + 616r^5st^3 + 6290r^5st^2 + 6290r^5st + 616r^5s + 616r^5t^3 + 2002r^5t^2 + 616r^5t - 814r^4s^3\right.\\&& \left.t^2 - 2574r^4s^3t - 814r^4s^3 - 814r^4s^2t^3 - 8569r^4s^2t^2 - 8569r^4s^2t - 814r^4s^2 - 2574r^4st^3 - 8569r^4\right.\\&& \left.st^2 - 2574r^4st - 814r^4t^3 - 814r^4t^2 + 330r^3s^3t^3 + 3575r^3s^3t^2 + 3575r^3s^3t + 330r^3s^3 + 3575r^3s^2\right.\\&& \left.t^3 + 12320r^3s^2t^2 + 3575r^3s^2t + 3575r^3st^3 + 3575r^3st^2 + 330r^3t^3 - 1485r^2s^3t^3 - 5280r^2s^3t^2 -\right.\\&& \left. 1485r^2s^3t - 5280r^2s^2t^3 - 5280r^2s^2t^2 - 1485r^2st^3 + 2244rs^3t^3 + 2244rs^3t^2 + 2244rs^2t^3 - 924s^3t^3)\right.,\\
            B^{[1]}_{61}&=&\frac{h^3s^7}{27720r^3(r - s)^3(r - t)^3(r - 1)^3}\left.   (54r^4s^4 - 198r^4s^3t - 198r^4s^3 + 198r^4s^2t^2 + 792r^4s^2t + 198r^4s^2\right.\\&& \left. - 891r^4st^2 - 891r^4st + 1188r^4t^2 - 70r^3s^5 + 208r^3s^4t + 208r^3s^4 - 88r^3s^3t^2 - 660r^3s^3t - 88r^3s^3\right.\\&& \left. - 154r^3s^2t^3 + 275r^3s^2t^2 + 275r^3s^2t - 154r^3s^2 + 693r^3st^3 + 66r^3st^2 + 693r^3st - 924r^3t^3 - 924r^3\right.\\&& \left.t^2 + 21r^2s^6 - 21r^2s^5t - 21r^2s^5 - 116r^2s^4t^2 - 70r^2s^4t - 116r^2s^4 + 176r^2s^3t^3 + 506r^2s^3t^2 + 506\right.\\&& \left.r^2s^3t + 176r^2s^3 - 649r^2s^2t^3 - 781r^2s^2t^2 - 649r^2s^2t + 462r^2st^3 + 462r^2st^2 + 660r^2t^3 - 14rs^6t\right.\\&& \left. - 14rs^6 + 48rs^5t^2 + 64rs^5t + 48rs^5 - 44rs^4t^3 - 106rs^4t^2 - 106rs^4t - 44rs^4 + 66rs^3t^3 - 88rs^3t^2\right.\\
        \end{eqnarray*}
        \begin{eqnarray*}
            && \left. + 66rs^3t + 275rs^2t^3 + 275rs^2t^2 - 594rst^3 + 7s^6t - 24s^5t^2 - 24s^5t + 22s^4t^3 + 88s^4t^2 + 22s^4t - \right.\\&& \left.88s^3t^3 - 88s^3t^2 + 99s^2t^3)\right.,\\
            B^{[1]}_{71}&=&\frac{h^3t^7}{27720r^3(r - s)^3(r - t)^3(r - 1)^3}\left.    (198r^4s^2t^2 - 891r^4s^2t + 1188r^4s^2 - 198r^4st^3 + 792r^4st^2 - 891r^4\right.\\&& \left.st + 54r^4t^4 - 198r^4t^3 + 198r^4t^2 - 154r^3s^3t^2 + 693r^3s^3t - 924r^3s^3 - 88r^3s^2t^3 + 275r^3s^2t^2 + 66r^3\right.\\&& \left.s^2t - 924r^3s^2 + 208r^3st^4 - 660r^3st^3 + 275r^3st^2 + 693r^3st - 70r^3t^5 + 208r^3t^4 - 88r^3t^3 - 154r^3t^2\right.\\&& \left. + 176r^2s^3t^3 - 649r^2s^3t^2 + 462r^2s^3t + 660r^2s^3 - 116r^2s^2t^4 + 506r^2s^2t^3 - 781r^2s^2t^2 + 462r^2s^2t - \right.\\&& \left.21r^2st^5 - 70r^2st^4 + 506r^2st^3 - 649r^2st^2 + 21r^2t^6 - 21r^2t^5 - 116r^2t^4 + 176r^2t^3 - 44rs^3t^4 + 66r\right.\\&& \left.s^3t^3 + 275rs^3t^2 - 594rs^3t + 48rs^2t^5 - 106rs^2t^4 - 88rs^2t^3 + 275rs^2t^2 - 14rst^6 + 64rst^5 - 106rs\right.\\&& \left.t^4 + 66rst^3 - 14rt^6 + 48rt^5 - 44rt^4 + 22s^3t^4 - 88s^3t^3 + 99s^3t^2 - 24s^2t^5 + 88s^2t^4 - 88s^2t^3 + 7s\right.\\&& \left.t^6 - 24st^5 + 22st^4)\right.,\\
            B^{[1]}_{81}&=&\frac{-h^3}{27720r^3(r - s)^3(r - t)^3(r - 1)^3}\left.   (- 1188r^4s^2t^2 + 891r^4s^2t - 198r^4s^2 + 891r^4st^2 - 792r^4st + 198\right.\\&& \left.r^4s - 198r^4t^2 + 198r^4t - 54r^4 + 924r^3s^3t^2 - 693r^3s^3t + 154r^3s^3 + 924r^3s^2t^3 - 66r^3s^2t^2 - 275r^3\right.\\&& \left.s^2t + 88r^3s^2 - 693r^3st^3 - 275r^3st^2 + 660r^3st - 208r^3s + 154r^3t^3 + 88r^3t^2 - 208r^3t + 70r^3 - 660\right.\\&& \left.r^2s^3t^3 - 462r^2s^3t^2 + 649r^2s^3t - 176r^2s^3 - 462r^2s^2t^3 + 781r^2s^2t^2 - 506r^2s^2t + 116r^2s^2 + 649r^2s\right.\\&& \left.t^3 - 506r^2st^2 + 70r^2st + 21r^2s - 176r^2t^3 + 116r^2t^2 + 21r^2t - 21r^2 + 594rs^3t^3 - 275rs^3t^2 - 66rs^3\right.\\&& \left.t + 44rs^3 - 275rs^2t^3 + 88rs^2t^2 + 106rs^2t - 48rs^2 - 66rst^3 + 106rst^2 - 64rst + 14rs + 44rt^3 - 48\right.\\&& \left.rt^2 + 14rt - 99s^3t^3 + 88s^3t^2 - 22s^3t + 88s^2t^3 - 88s^2t^2 + 24s^2t - 22st^3 + 24st^2 - 7st)\right.,\\
            B^{[1]}_{91}&=&\frac{h^2r^2}{27720(r - s)^3(r - t)^3(r - 1)^3}\left.   (756r^9 - 2646r^8s - 2646r^8t - 2646r^8 + 3069r^7s^2 + 9420r^7st + \right.\\&& \left.9420r^7s + 3069r^7t^2 + 9420r^7t + 3069r^7 - 1155r^6s^3 - 11121r^6s^2t - 11121r^6s^2 - 11121r^6st^2 - \right.\\&& \left.34278r^6st - 11121r^6s - 1155r^6t^3 - 11121r^6t^2 - 11121r^6t - 1155r^6 + 4235r^5s^3t + 4235r^5s^3 +\right.\\&& \left. 13376r^5s^2t^2 + 41437r^5s^2t + 13376r^5s^2 + 4235r^5st^3 + 41437r^5st^2 + 41437r^5st + 4235r^5s +\right.\\&& \left. 4235r^5t^3 + 13376r^5t^2 + 4235r^5t - 5148r^4s^3t^2 - 16027r^4s^3t - 5148r^4s^3 - 5148r^4s^2t^3 - 51436\right.\\&& \left.r^4s^2t^2 - 51436r^4s^2t - 5148r^4s^2 - 16027r^4st^3 - 51436r^4st^2 - 16027r^4st - 5148r^4t^3 - 5148r^4\right.\\&& \left.t^2 + 1980r^3s^3t^3 + 20196r^3s^3t^2 + 20196r^3s^3t + 1980r^3s^3 + 20196r^3s^2t^3 + 66330r^3s^2t^2 + 20196\right.\\&& \left.r^3s^2t + 20196r^3st^3 + 20196r^3st^2 + 1980r^3t^3 - 7920r^2s^3t^3 - 26598r^2s^3t^2 - 7920r^2s^3t - 26598\right.\\&& \left.r^2s^2t^3 - 26598r^2s^2t^2 - 7920r^2st^3 + 10626rs^3t^3 + 10626rs^3t^2 + 10626rs^2t^3 - 4158s^3t^3)\right.,\\
            B^{[1]}_{101}&=&\frac{h^2s^6}{27720r^3(r - s)^3(r - t)^3(r - 1)^3}\left.   (297r^4s^4 - 990r^4s^3t - 990r^4s^3 + 891r^4s^2t^2 + 3564r^4s^2t + 891\right.\\&& \left.r^4s^2 - 3564r^4st^2 - 3564r^4st + 4158r^4t^2 - 399r^3s^5 + 1067r^3s^4t + 1067r^3s^4 - 363r^3s^3t^2 - 2992\right.\\&& \left.r^3s^3t - 363r^3s^3 - 693r^3s^2t^3 + 891r^3s^2t^2 + 891r^3s^2t - 693r^3s^2 + 2772r^3st^3 + 726r^3st^2 + 2772\right.\\&& \left.r^3st - 3234r^3t^3 - 3234r^3t^2 + 126r^2s^6 - 105r^2s^5t - 105r^2s^5 - 616r^2s^4t^2 - 407r^2s^4t - 616r^2s^4 \right.\\&& \left.+ 825r^2s^3t^3 + 2387r^2s^3t^2 + 2387r^2s^3t + 825r^2s^3 - 2673r^2s^2t^3 - 3168r^2s^2t^2 - 2673r^2s^2t + 1518\right.\\&& \left.r^2st^3 + 1518r^2st^2 + 2310r^2t^3 - 84rs^6t - 84rs^6 + 264rs^5t^2 + 345rs^5t + 264rs^5 - 220rs^4t^3 - 506\right.\\&& \left.rs^4t^2 - 506rs^4t - 220rs^4 + 275rs^3t^3 - 484rs^3t^2 + 275rs^3t + 1188rs^2t^3 + 1188rs^2t^2 - 2178rst^3\right.\\&& \left. + 42s^6t - 132s^5t^2 - 132s^5t + 110s^4t^3 + 440s^4t^2 + 110s^4t - 396s^3t^3 - 396s^3t^2 + 396s^2t^3)\right.,\\
            B^{[1]}_{111}&=&\frac{h^2t^6}{27720r^3(r - s)^3(r - t)^3(r - 1)^3}\left.    (891r^4s^2t^2 - 3564r^4s^2t + 4158r^4s^2 - 990r^4st^3 + 3564r^4st^2 - 3564\right.\\&& \left.r^4st + 297r^4t^4 - 990r^4t^3 + 891r^4t^2 - 693r^3s^3t^2 + 2772r^3s^3t - 3234r^3s^3 - 363r^3s^2t^3 + 891r^3s^2t^2 \right.\\&& \left.+ 726r^3s^2t - 3234r^3s^2 + 1067r^3st^4 - 2992r^3st^3 + 891r^3st^2 + 2772r^3st - 399r^3t^5 + 1067r^3t^4 - 363\right.\\&& \left.r^3t^3 - 693r^3t^2 + 825r^2s^3t^3 - 2673r^2s^3t^2 + 1518r^2s^3t + 2310r^2s^3 - 616r^2s^2t^4 + 2387r^2s^2t^3 - 3168\right.\\&& \left.r^2s^2t^2 + 1518r^2s^2t - 105r^2st^5 - 407r^2st^4 + 2387r^2st^3 - 2673r^2st^2 + 126r^2t^6 - 105r^2t^5 - 616r^2t^4\right.\\&& \left. + 825r^2t^3 - 220rs^3t^4 + 275rs^3t^3 + 1188rs^3t^2 - 2178rs^3t + 264rs^2t^5 - 506rs^2t^4 - 484rs^2t^3 + 1188\right.\\&& \left.rs^2t^2 - 84rst^6 + 345rst^5 - 506rst^4 + 275rst^3 - 84rt^6 + 264rt^5 - 220rt^4 + 110s^3t^4 - 396s^3t^3 + \right.\\
        \end{eqnarray*}
        \begin{eqnarray*}
            && \left.396s^3t^2 - 132s^2t^5 + 440s^2t^4 - 396s^2t^3 + 42st^6 - 132st^5 + 110st^4)\right.,\\
            B^{[1]}_{121}&=&\frac{ -h^2}{27720r^3(r - s)^3(r - t)^3(r - 1)^3}\left.    (- 4158r^4s^2t^2 + 3564r^4s^2t - 891r^4s^2 + 3564r^4st^2 - 3564r^4st + \right.\\&& \left.990r^4s - 891r^4t^2 + 990r^4t - 297r^4 + 3234r^3s^3t^2 - 2772r^3s^3t + 693r^3s^3 + 3234r^3s^2t^3 - 726r^3s^2\right.\\&& \left.t^2 - 891r^3s^2t + 363r^3s^2 - 2772r^3st^3 - 891r^3st^2 + 2992r^3st - 1067r^3s + 693r^3t^3 + 363r^3t^2 - \right.\\&& \left.1067r^3t + 399r^3 - 2310r^2s^3t^3 - 1518r^2s^3t^2 + 2673r^2s^3t - 825r^2s^3 - 1518r^2s^2t^3 + 3168r^2s^2t^2 - \right.\\&& \left.2387r^2s^2t + 616r^2s^2 + 2673r^2st^3 - 2387r^2st^2 + 407r^2st + 105r^2s - 825r^2t^3 + 616r^2t^2 + 105r^2t - \right.\\&& \left.126r^2 + 2178rs^3t^3 - 1188rs^3t^2 - 275rs^3t + 220rs^3 - 1188rs^2t^3 + 484rs^2t^2 + 506rs^2t - 264rs^2 - \right.\\&& \left.275rst^3 + 506rst^2 - 345rst + 84rs + 220rt^3 - 264rt^2 + 84rt - 396s^3t^3 + 396s^3t^2 - 110s^3t + 396\right.\\&& \left.s^2t^3 - 440s^2t^2 + 132s^2t - 110st^3 + 132st^2 - 42st)\right.,\\
            B^{[1]}_{131}&=&\frac{hr}{1260(r - s)^3(r - t)^3(r - 1)^3}\left.     (252r^9 - 819r^8s - 819r^8t - 819r^8 + 885r^7s^2 + 2686r^7st + 2686r^7s\right.\\&& \left. + 885r^7t^2 + 2686r^7t + 885r^7 - 315r^6s^3 - 2930r^6s^2t - 2930r^6s^2 - 2930r^6st^2 - 8913r^6st - 2930r^6\right.\\&& \left.s - 315r^6t^3 - 2930r^6t^2 - 2930r^6t - 315r^6 + 1050r^5s^3t + 1050r^5s^3 + 3228r^5s^2t^2 + 9847r^5s^2t +\right.\\&& \left. 3228r^5s^2 + 1050r^5st^3 + 9847r^5st^2 + 9847r^5st + 1050r^5s + 1050r^5t^3 + 3228r^5t^2 + 1050r^5t - 1164\right.\\&& \left.r^4s^3t^2 - 3561r^4s^3t - 1164r^4s^3 - 1164r^4s^2t^3 - 11034r^4s^2t^2 - 11034r^4s^2t - 1164r^4s^2 - 3561r^4st^3\right.\\&& \left. - 11034r^4st^2 - 3561r^4st - 1164r^4t^3 - 1164r^4t^2 + 420r^3s^3t^3 + 4026r^3s^3t^2 + 4026r^3s^3t + 420r^3s^3\right.\\&& \left. + 4026r^3s^2t^3 + 12618r^3s^2t^2 + 4026r^3s^2t + 4026r^3st^3 + 4026r^3st^2 + 420r^3t^3 - 1470r^2s^3t^3 - 4662\right.\\&& \left.r^2s^3t^2 - 1470r^2s^3t - 4662r^2s^2t^3 - 4662r^2s^2t^2 - 1470r^2st^3 + 1722rs^3t^3 + 1722rs^3t^2 + 1722rs^2t^3\right.\\&& \left. - 630s^3t^3)\right.,\\
            B^{[1]}_{141}&=&\frac{hs^5}{1260r^3(r - s)^3(r - t)^3(r - 1)^3}\left.     (45r^4s^4 - 135r^4s^3t - 135r^4s^3 + 108r^4s^2t^2 + 432r^4s^2t + 108r^4s^2 -\right.\\&& \left. 378r^4st^2 - 378r^4st + 378r^4t^2 - 63r^3s^5 + 150r^3s^4t + 150r^3s^4 - 39r^3s^3t^2 - 366r^3s^3t - 39r^3s^3 - 84\right.\\
            && \left.r^3s^2t^3 + 66r^3s^2t^2 + 66r^3s^2t - 84r^3s^2 + 294r^3st^3 + 126r^3st^2 + 294r^3st - 294r^3t^3 - 294r^3t^2 + \right.\\&& \left.21r^2s^6 - 14r^2s^5t - 14r^2s^5 - 90r^2s^4t^2 - 65r^2s^4t - 90r^2s^4 + 105r^2s^3t^3 + 306r^2s^3t^2 + 306r^2s^3\right.\\&& \left.t + 105r^2s^3 - 294r^2s^2t^3 - 342r^2s^2t^2 - 294r^2s^2t + 126r^2st^3 + 126r^2st^2 + 210r^2t^3 - 14rs^6t - \right.\\&& \left.14rs^6 + 40rs^5t^2 + 51rs^5t + 40rs^5 - 30rs^4t^3 - 65rs^4t^2 - 65rs^4t - 30rs^4 + 30rs^3t^3 - 72rs^3t^2\right.\\&& \left. + 30rs^3t + 138rs^2t^3 + 138rs^2t^2 - 210rst^3 + 7s^6t - 20s^5t^2 - 20s^5t + 15s^4t^3 + 60s^4t^2 + 15s^4t\right.\\&& \left. - 48s^3t^3 - 48s^3t^2 + 42s^2t^3)\right.,\\
            B^{[1]}_{151}&=&\frac{ht^5}{1260r^3(r - s)^3(r - t)^3(r - 1)^3}\left.  (108r^4s^2t^2 - 378r^4s^2t + 378r^4s^2 - 135r^4st^3 + 432r^4st^2 - 378\right.\\&& \left.r^4st + 45r^4t^4 - 135r^4t^3 + 108r^4t^2 - 84r^3s^3t^2 + 294r^3s^3t - 294r^3s^3 - 39r^3s^2t^3 + 66r^3s^2t^2 +\right.\\&& \left. 126r^3s^2t - 294r^3s^2 + 150r^3st^4 - 366r^3st^3 + 66r^3st^2 + 294r^3st - 63r^3t^5 + 150r^3t^4 - 39r^3t^3 -\right.\\&& \left. 84r^3t^2 + 105r^2s^3t^3 - 294r^2s^3t^2 + 126r^2s^3t + 210r^2s^3 - 90r^2s^2t^4 + 306r^2s^2t^3 - 342r^2s^2t^2 + \right.\\&& \left.126r^2s^2t - 14r^2st^5 - 65r^2st^4 + 306r^2st^3 - 294r^2st^2 + 21r^2t^6 - 14r^2t^5 - 90r^2t^4 + 105r^2t^3 - \right.\\&& \left.30rs^3t^4 + 30rs^3t^3 + 138rs^3t^2 - 210rs^3t + 40rs^2t^5 - 65rs^2t^4 - 72rs^2t^3 + 138rs^2t^2 - 14rst^6 +\right.\\&& \left. 51rst^5 - 65rst^4 + 30rst^3 - 14rt^6 + 40rt^5 - 30rt^4 + 15s^3t^4 - 48s^3t^3 + 42s^3t^2 - 20s^2t^5 + 60s^2\right.\\&& \left.t^4 - 48s^2t^3 + 7st^6 - 20st^5 + 15st^4)\right.,\\
            B^{[1]}_{161}&=&\frac{-h}{1260r^3(r - s)^3(r - t)^3(r - 1)^3}\left. (- 378r^4s^2t^2 + 378r^4s^2t - 108r^4s^2 + 378r^4st^2 - 432r^4st + 135\right.\\&& \left.r^4s - 108r^4t^2 + 135r^4t - 45r^4 + 294r^3s^3t^2 - 294r^3s^3t + 84r^3s^3 + 294r^3s^2t^3 - 126r^3s^2t^2 - 66\right.\\&& \left.r^3s^2t + 39r^3s^2 - 294r^3st^3 - 66r^3st^2 + 366r^3st - 150r^3s + 84r^3t^3 + 39r^3t^2 - 150r^3t + 63r^3 -\right.\\&& \left. 210r^2s^3t^3 - 126r^2s^3t^2 + 294r^2s^3t - 105r^2s^3 - 126r^2s^2t^3 + 342r^2s^2t^2 - 306r^2s^2t + 90r^2s^2 + 294\right.\\&& \left.r^2st^3 - 306r^2st^2 + 65r^2st + 14r^2s - 105r^2t^3 + 90r^2t^2 + 14r^2t - 21r^2 + 210rs^3t^3 - 138rs^3t^2 - \right.\\&& \left.30rs^3t + 30rs^3 - 138rs^2t^3 + 72rs^2t^2 + 65rs^2t - 40rs^2 - 30rst^3 + 65rst^2 - 51rst + 14rs + 30rt^3 \right.\\&& \left.- 40rt^2 + 14rt - 42s^3t^3 + 48s^3t^2 - 15s^3t + 48s^2t^3 - 60s^2t^2 + 20s^2t - 15st^3 + 20st^2 - 7st)\right.,\\
        \end{eqnarray*}
        \begin{eqnarray*}
            B^{[1]}_{12}&=&\frac{h^4r^8}{2162160s^3(r - s)^3(s - t)^3(s - 1)^3}\left.(- 210r^6s^2 + 140r^6st + 140r^6s - 70r^6t + 735r^5s^3 + 245r^5s^2t \right.\\&& \left. + 245r^5s^2 - 520r^5st^2 - 705r^5st - 520r^5s + 260r^5t^2 + 260r^5t - 585r^4s^4 - 2405r^4s^3t - 2405r^4s^3 \right.\\&& \left. + 1300r^4s^2t^2 + 715r^4s^2t + 1300r^4s^2 + 520r^4st^3 + 1300r^4st^2 + 1300r^4st + 520r^4s - 260r^4t^3 - \right.\\&& \left. 1040r^4t^2 - 260r^4t + 2340r^3s^4t + 2340r^3s^4 + 1222r^3s^3t^2 + 8528r^3s^3t + 1222r^3s^3 - 2210r^3s^2t^3  \right.\\&& \left.- 6318r^3s^2t^2 - 6318r^3s^2t - 2210r^3s^2 - 910r^3st^3 + 936r^3st^2 - 910r^3st + 1144r^3t^3 + 1144r^3t^2  \right.\\&& \left.- 2574r^2s^4t^2 - 10296r^2s^4t - 2574r^2s^4 + 2002r^2s^3t^3 - 4576r^2s^3t^2 - 4576r^2s^3t + 2002r^2s^3 + \right.\\&& \left. 9152r^2s^2t^3 + 11154r^2s^2t^2 + 9152r^2s^2t - 3718r^2st^3 - 3718r^2st^2 - 1430r^2t^3 + 12870rs^4t^2 +  \right.\\&& \left.12870rs^4t - 10010rs^3t^3 + 715rs^3t^2 - 10010rs^3t - 7865rs^2t^3 - 7865rs^2t^2 + 9295rst^3 - 19305 \right.\\&& \left.s^4t^2 + 15015s^3t^3 + 15015s^3t^2 - 10725s^2t^3)\right.,\\
            B^{[1]}_{22}&=&\frac{h^4s^4}{2162160(r - s)^3(s - t)^3(s - 1)^3}\left.(1365r^3s^6 - 5915r^3s^5t - 5915r^3s^5 + 8437r^3s^4t^2 + 27053r^3s^4t \right.\\&& \left. + 8437r^3s^4 - 3575r^3s^3t^3 - 41041r^3s^3t^2 - 41041r^3s^3t - 3575r^3s^3 + 17875r^3s^2t^3 + 67210r^3s^2t^2 \right.\\&& \left. + 17875r^3s^2t - 30030r^3st^3 - 30030r^3st^2 + 12870r^3t^3 - 3315r^2s^7 + 14105r^2s^6t + 14105r^2s^6 - \right.\\&& \left. 19799r^2s^5t^2 - 63011r^2s^5t - 19799r^2s^5 + 8437r^2s^4t^3 + 93483r^2s^4t^2 + 93483r^2s^4t + 8437r^2s^4 - \right.\\&& \left. 41041r^2s^3t^3 - 148434r^2s^3t^2 - 41041r^2s^3t + 67210r^2s^2t^3 + 67210r^2s^2t^2 - 30030r^2st^3 + 2520rs^8 \right.\\&& \left. - 10390rs^7t - 10390rs^7 + 14105rs^6t^2 + 44520rs^6t + 14105rs^6 - 5915rs^5t^3 - 63011rs^5t^2 - \right.\\&& \left. 63011rs^5t - 5915rs^5 + 27053rs^4t^3 + 93483rs^4t^2 + 27053rs^4t - 41041rs^3t^3 - 41041rs^3t^2 + 17875 \right.\\&& \left.rs^2t^3 - 630s^9 + 2520s^8t + 2520s^8 - 3315s^7t^2 - 10390s^7t - 3315s^7 + 1365s^6t^3 + 14105s^6t^2 + \right.\\&& \left. 14105s^6t + 1365s^6 - 5915s^5t^3 - 19799s^5t^2 - 5915s^5t + 8437s^4t^3 + 8437s^4t^2 - 3575s^3t^3)\right.,\\
            B^{[1]}_{32}&=&\frac{h^4t^8}{2162160s^3(r - s)^3(s - t)^3(s - 1)^3}\left.(2002r^3s^3t^2 - 10010r^3s^3t + 15015r^3s^3 - 2210r^3s^2t^3 + 9152r^3 \right.\\&& \left.s^2t^2 - 7865r^3s^2t - 10725r^3s^2 + 520r^3st^4 - 910r^3st^3 - 3718r^3st^2 + 9295r^3st - 260r^3t^4 + 1144r^3 \right.\\&& \left.t^3 - 1430r^3t^2 - 2574r^2s^4t^2 + 12870r^2s^4t - 19305r^2s^4 + 1222r^2s^3t^3 - 4576r^2s^3t^2 + 715r^2s^3t +  \right.\\&& \left.15015r^2s^3 + 1300r^2s^2t^4 - 6318r^2s^2t^3 + 11154r^2s^2t^2 - 7865r^2s^2t - 520r^2st^5 + 1300r^2st^4 + 936 \right.\\&& \left.r^2st^3 - 3718r^2st^2 + 260r^2t^5 - 1040r^2t^4 + 1144r^2t^3 + 2340rs^4t^3 - 10296rs^4t^2 + 12870rs^4t - 2405 \right.\\
            && \left.rs^3t^4 + 8528rs^3t^3 - 4576rs^3t^2 - 10010rs^3t + 245rs^2t^5 + 715rs^2t^4 - 6318rs^2t^3 + 9152rs^2t^2 +  \right.\\&& \left.140rst^6 - 705rst^5 + 1300rst^4 - 910rst^3 - 70rt^6 + 260rt^5 - 260rt^4 - 585s^4t^4 + 2340s^4t^3 -  \right.\\&& \left.2574s^4t^2 + 735s^3t^5 - 2405s^3t^4 + 1222s^3t^3 + 2002s^3t^2 - 210s^2t^6 + 245s^2t^5 + 1300s^2t^4 - 2210 \right.\\&& \left.s^2t^3 + 140st^6 - 520st^5 + 520st^4)\right.,\\
            B^{[1]}_{42}&=&\frac{h^4}{2162160s^3(r - s)^3(s - t)^3(s - 1)^3}\left.(15015r^3s^3t^2 - 10010r^3s^3t + 2002r^3s^3 - 10725r^3s^2t^3 - \right.\\&& \left. 7865r^3s^2t^2 + 9152r^3s^2t - 2210r^3s^2 + 9295r^3st^3 - 3718r^3st^2 - 910r^3st + 520r^3s - 1430r^3 \right.\\&& \left.t^3 + 1144r^3t^2 - 260r^3t - 19305r^2s^4t^2 + 12870r^2s^4t - 2574r^2s^4 + 15015r^2s^3t^3 + 715r^2s^3t^2 \right.\\&& \left. - 4576r^2s^3t + 1222r^2s^3 - 7865r^2s^2t^3 + 11154r^2s^2t^2 - 6318r^2s^2t + 1300r^2s^2 - 3718r^2st^3 + \right.\\&& \left. 936r^2st^2 + 1300r^2st - 520r^2s + 1144r^2t^3 - 1040r^2t^2 + 260r^2t + 12870rs^4t^2 - 10296rs^4t +  \right.\\&& \left.2340rs^4 - 10010rs^3t^3 - 4576rs^3t^2 + 8528rs^3t - 2405rs^3 + 9152rs^2t^3 - 6318rs^2t^2 + 715rs^2 \right.\\&& \left.t + 245rs^2 - 910rst^3 + 1300rst^2 - 705rst + 140rs - 260rt^3 + 260rt^2 - 70rt - 2574s^4t^2 + \right.\\&& \left. 2340s^4t - 585s^4 + 2002s^3t^3 + 1222s^3t^2 - 2405s^3t + 735s^3 - 2210s^2t^3 + 1300s^2t^2 + 245s^2 \right.\\&& \left.t - 210s^2 + 520st^3 - 520st^2 + 140st)\right.,\\
            B^{[1]}_{52}&=&\frac{h^3r^7}{27720s^3(r - s)^3(s - t)^3(s - 1)^3}\left.(- 21r^6s^2 + 14r^6st + 14r^6s - 7r^6t + 70r^5s^3 + 21r^5s^2t + 21 \right.\\&& \left.r^5s^2 - 48r^5st^2 - 64r^5st - 48r^5s + 24r^5t^2 + 24r^5t - 54r^4s^4 - 208r^4s^3t - 208r^4s^3 + 116r^4s^2 \right.\\&& \left.t^2 + 70r^4s^2t + 116r^4s^2 + 44r^4st^3 + 106r^4st^2 + 106r^4st + 44r^4s - 22r^4t^3 - 88r^4t^2 - 22r^4t \right.\\&& \left. + 198r^3s^4t + 198r^3s^4 + 88r^3s^3t^2 + 660r^3s^3t + 88r^3s^3 - 176r^3s^2t^3 - 506r^3s^2t^2 - 506r^3s^2t \right.\\&& \left. - 176r^3s^2 - 66r^3st^3 + 88r^3st^2 - 66r^3st + 88r^3t^3 + 88r^3t^2 - 198r^2s^4t^2 - 792r^2s^4t - 198r^2 \right.\\
        \end{eqnarray*}
        \begin{eqnarray*}
            && \left.s^4 + 154r^2s^3t^3 - 275r^2s^3t^2 - 275r^2s^3t + 154r^2s^3 + 649r^2s^2t^3 + 781r^2s^2t^2 + 649r^2s^2t - 275 \right.\\&& \left.r^2st^3 - 275r^2st^2 - 99r^2t^3 + 891rs^4t^2 + 891rs^4t - 693rs^3t^3 - 66rs^3t^2 - 693rs^3t - 462rs^2t^3  \right.\\&& \left.- 462rs^2t^2 + 594rst^3 - 1188s^4t^2 + 924s^3t^3 + 924s^3t^2 - 660s^2t^3)\right.,\\
            B^{[1]}_{62}&=&\frac{h^3s^3}{27720(r - s)^3(s - t)^3(s - 1)^3}\left.(154r^3s^6 - 616r^3s^5t - 616r^3s^5 + 814r^3s^4t^2 + 2574r^3s^4t + 814 \right.\\&& \left.r^3s^4 - 330r^3s^3t^3 - 3575r^3s^3t^2 - 3575r^3s^3t - 330r^3s^3 + 1485r^3s^2t^3 + 5280r^3s^2t^2 + 1485r^3s^2 \right.\\&& \left.t - 2244r^3st^3 - 2244r^3st^2 + 924r^3t^3 - 390r^2s^7 + 1536r^2s^6t + 1536r^2s^6 - 2002r^2s^5t^2 - 6290 \right.\\&& \left.r^2s^5t - 2002r^2s^5 + 814r^2s^4t^3 + 8569r^2s^4t^2 + 8569r^2s^4t + 814r^2s^4 - 3575r^2s^3t^3 - 12320r^2s^3 \right.\\&& \left.t^2 - 3575r^2s^3t + 5280r^2s^2t^3 + 5280r^2s^2t^2 - 2244r^2st^3 + 315rs^8 - 1210rs^7t - 1210rs^7 + 1536 \right.\\&& \left.rs^6t^2 + 4793rs^6t + 1536rs^6 - 616rs^5t^3 - 6290rs^5t^2 - 6290rs^5t - 616rs^5 + 2574rs^4t^3 + 8569 \right.\\&& \left.rs^4t^2 + 2574rs^4t - 3575rs^3t^3 - 3575rs^3t^2 + 1485rs^2t^3 - 84s^9 + 315s^8t + 315s^8 - 390s^7t^2 - \right.\\&& \left. 1210s^7t - 390s^7 + 154s^6t^3 + 1536s^6t^2 + 1536s^6t + 154s^6 - 616s^5t^3 - 2002s^5t^2 - 616s^5t + 814 \right.\\&& \left.s^4t^3 + 814s^4t^2 - 330s^3t^3)\right.,\\
            B^{[1]}_{72}&=&\frac{h^3t^7}{27720s^3(r - s)^3(s - t)^3(s - 1)^3}\left.(154r^3s^3t^2 - 693r^3s^3t + 924r^3s^3 - 176r^3s^2t^3 + 649r^3s^2t^2 -  \right.\\&& \left.462r^3s^2t - 660r^3s^2 + 44r^3st^4 - 66r^3st^3 - 275r^3st^2 + 594r^3st - 22r^3t^4 + 88r^3t^3 - 99r^3t^2 - \right.\\&& \left. 198r^2s^4t^2 + 891r^2s^4t - 1188r^2s^4 + 88r^2s^3t^3 - 275r^2s^3t^2 - 66r^2s^3t + 924r^2s^3 + 116r^2s^2t^4 \right.\\&& \left. - 506r^2s^2t^3 + 781r^2s^2t^2 - 462r^2s^2t - 48r^2st^5 + 106r^2st^4 + 88r^2st^3 - 275r^2st^2 + 24r^2t^5 - 88 \right.\\&& \left.r^2t^4 + 88r^2t^3 + 198rs^4t^3 - 792rs^4t^2 + 891rs^4t - 208rs^3t^4 + 660rs^3t^3 - 275rs^3t^2 - 693rs^3t + \right.\\&& \left. 21rs^2t^5 + 70rs^2t^4 - 506rs^2t^3 + 649rs^2t^2 + 14rst^6 - 64rst^5 + 106rst^4 - 66rst^3 - 7rt^6 + 24rt^5  \right.\\&& \left.- 22rt^4 - 54s^4t^4 + 198s^4t^3 - 198s^4t^2 + 70s^3t^5 - 208s^3t^4 + 88s^3t^3 + 154s^3t^2 - 21s^2t^6 + 21s^2t^5 \right.\\&& \left. + 116s^2t^4 - 176s^2t^3 + 14st^6 - 48st^5 + 44st^4)\right.,\\
            B^{[1]}_{82}&=&\frac{h^3}{27720s^3(r - s)^3(s - t)^3(s - 1)^3}\left.(924r^3s^3t^2 - 693r^3s^3t + 154r^3s^3 - 660r^3s^2t^3 - 462r^3s^2t^2 + \right.\\&& \left. 649r^3s^2t - 176r^3s^2 + 594r^3st^3 - 275r^3st^2 - 66r^3st + 44r^3s - 99r^3t^3 + 88r^3t^2 - 22r^3t - 1188 \right.\\&& \left.r^2s^4t^2 + 891r^2s^4t - 198r^2s^4 + 924r^2s^3t^3 - 66r^2s^3t^2 - 275r^2s^3t + 88r^2s^3 - 462r^2s^2t^3 + 781r^2 \right.\\&& \left.s^2t^2 - 506r^2s^2t + 116r^2s^2 - 275r^2st^3 + 88r^2st^2 + 106r^2st - 48r^2s + 88r^2t^3 - 88r^2t^2 + 24r^2t \right.\\&& \left. + 891rs^4t^2 - 792rs^4t + 198rs^4 - 693rs^3t^3 - 275rs^3t^2 + 660rs^3t - 208rs^3 + 649rs^2t^3 - 506rs^2 \right.\\&& \left.t^2 + 70rs^2t + 21rs^2 - 66rst^3 + 106rst^2 - 64rst + 14rs - 22rt^3 + 24rt^2 - 7rt - 198s^4t^2 + 198 \right.\\
            && \left.s^4t - 54s^4 + 154s^3t^3 + 88s^3t^2 - 208s^3t + 70s^3 - 176s^2t^3 + 116s^2t^2 + 21s^2t - 21s^2 + 44st^3 -\right.\\&& \left. 48st^2 + 14st)\right.,\\
            B^{[1]}_{92}&=&\frac{h^2r^6}{27720s^3(r - s)^3(s - t)^3(s - 1)^3}\left.(- 126r^6s^2 + 84r^6st + 84r^6s - 42r^6t + 399r^5s^3 + 105r^5s^2t +\right.\\&& \left. 105r^5s^2 - 264r^5st^2 - 345r^5st - 264r^5s + 132r^5t^2 + 132r^5t - 297r^4s^4 - 1067r^4s^3t - 1067r^4s^3 \right.\\&& \left.+ 616r^4s^2t^2 + 407r^4s^2t + 616r^4s^2 + 220r^4st^3 + 506r^4st^2 + 506r^4st + 220r^4s - 110r^4t^3 - 440\right.\\&& \left.r^4t^2 - 110r^4t + 990r^3s^4t + 990r^3s^4 + 363r^3s^3t^2 + 2992r^3s^3t + 363r^3s^3 - 825r^3s^2t^3 - 2387r^3\right.\\&& \left.s^2t^2 - 2387r^3s^2t - 825r^3s^2 - 275r^3st^3 + 484r^3st^2 - 275r^3st + 396r^3t^3 + 396r^3t^2 - 891r^2s^4t^2\right.\\&& \left. - 3564r^2s^4t - 891r^2s^4 + 693r^2s^3t^3 - 891r^2s^3t^2 - 891r^2s^3t + 693r^2s^3 + 2673r^2s^2t^3 + 3168r^2\right.\\&& \left.s^2t^2 + 2673r^2s^2t - 1188r^2st^3 - 1188r^2st^2 - 396r^2t^3 + 3564rs^4t^2 + 3564rs^4t - 2772rs^3t^3 -\right.\\&& \left. 726rs^3t^2 - 2772rs^3t - 1518rs^2t^3 - 1518rs^2t^2 + 2178rst^3 - 4158s^4t^2 + 3234s^3t^3 + 3234s^3t^2 - \right.\\&& \left.2310s^2t^3)\right.,\\
            B^{[1]}_{102}&=&\frac{h^2s^2}{27720(r - s)^3(s - t)^3(s - 1)^3}\left.(1155r^3s^6 - 4235r^3s^5t - 4235r^3s^5 + 5148r^3s^4t^2 + 16027r^3s^4t\right.\\&& \left. + 5148r^3s^4 - 1980r^3s^3t^3 - 20196r^3s^3t^2 - 20196r^3s^3t - 1980r^3s^3 + 7920r^3s^2t^3 + 26598r^3s^2t^2\right.\\&& \left. + 7920r^3s^2t - 10626r^3st^3 - 10626r^3st^2 + 4158r^3t^3 - 3069r^2s^7 + 11121r^2s^6t + 11121r^2s^6 -\right.\\&& \left. 13376r^2s^5t^2 - 41437r^2s^5t - 13376r^2s^5 + 5148r^2s^4t^3 + 51436r^2s^4t^2 + 51436r^2s^4t + 5148r^2s^4\right.\\
        \end{eqnarray*}
        \begin{eqnarray*}
            && \left. - 20196r^2s^3t^3 - 66330r^2s^3t^2 - 20196r^2s^3t + 26598r^2s^2t^3 + 26598r^2s^2t^2 - 10626r^2st^3 + 2646\right.\\&& \left.rs^8 - 9420rs^7t - 9420rs^7 + 11121rs^6t^2 + 34278rs^6t + 11121rs^6 - 4235rs^5t^3 - 41437rs^5t^2 - \right.\\&& \left.41437rs^5t - 4235rs^5 + 16027rs^4t^3 + 51436rs^4t^2 + 16027rs^4t - 20196rs^3t^3 - 20196rs^3t^2 +\right.\\&& \left. 7920rs^2t^3 - 756s^9 + 2646s^8t + 2646s^8 - 3069s^7t^2 - 9420s^7t - 3069s^7 + 1155s^6t^3 + 11121s^6t^2 \right.\\&& \left.+ 11121s^6t + 1155s^6 - 4235s^5t^3 - 13376s^5t^2 - 4235s^5t + 5148s^4t^3 + 5148s^4t^2 - 1980s^3t^3)\right.,\\
            B^{[1]}_{112}&=&\frac{h^2t^6}{27720s^3(r - s)^3(s - t)^3(s - 1)^3}\left.(693r^3s^3t^2 - 2772r^3s^3t + 3234r^3s^3 - 825r^3s^2t^3 + 2673r^3s^2t^2\right.\\&& \left. - 1518r^3s^2t - 2310r^3s^2 + 220r^3st^4 - 275r^3st^3 - 1188r^3st^2 + 2178r^3st - 110r^3t^4 + 396r^3t^3 -\right.\\&& \left. 396r^3t^2 - 891r^2s^4t^2 + 3564r^2s^4t - 4158r^2s^4 + 363r^2s^3t^3 - 891r^2s^3t^2 - 726r^2s^3t + 3234r^2s^3\right.\\&& \left. + 616r^2s^2t^4 - 2387r^2s^2t^3 + 3168r^2s^2t^2 - 1518r^2s^2t - 264r^2st^5 + 506r^2st^4 + 484r^2st^3 - 1188\right.\\&& \left.r^2st^2 + 132r^2t^5 - 440r^2t^4 + 396r^2t^3 + 990rs^4t^3 - 3564rs^4t^2 + 3564rs^4t - 1067rs^3t^4 + 2992r\right.\\&& \left.s^3t^3 - 891rs^3t^2 - 2772rs^3t + 105rs^2t^5 + 407rs^2t^4 - 2387rs^2t^3 + 2673rs^2t^2 + 84rst^6 - 345rs\right.\\&& \left.t^5 + 506rst^4 - 275rst^3 - 42rt^6 + 132rt^5 - 110rt^4 - 297s^4t^4 + 990s^4t^3 - 891s^4t^2 + 399s^3t^5 -\right.\\&& \left. 1067s^3t^4 + 363s^3t^3 + 693s^3t^2 - 126s^2t^6 + 105s^2t^5 + 616s^2t^4 - 825s^2t^3 + 84st^6 - 264st^5 +\right.\\&& \left. 220st^4)\right.,\\
            B^{[1]}_{122}&=&\frac{h^2}{27720s^3(r - s)^3(s - t)^3(s - 1)^3}\left.(3234r^3s^3t^2 - 2772r^3s^3t + 693r^3s^3 - 2310r^3s^2t^3 - 1518r^3s^2\right.\\&& \left.t^2 + 2673r^3s^2t - 825r^3s^2 + 2178r^3st^3 - 1188r^3st^2 - 275r^3st + 220r^3s - 396r^3t^3 + 396r^3t^2 - \right.\\&& \left.110r^3t - 4158r^2s^4t^2 + 3564r^2s^4t - 891r^2s^4 + 3234r^2s^3t^3 - 726r^2s^3t^2 - 891r^2s^3t + 363r^2s^3\right.\\&& \left. - 1518r^2s^2t^3 + 3168r^2s^2t^2 - 2387r^2s^2t + 616r^2s^2 - 1188r^2st^3 + 484r^2st^2 + 506r^2st - 264r^2\right.\\&& \left.s + 396r^2t^3 - 440r^2t^2 + 132r^2t + 3564rs^4t^2 - 3564rs^4t + 990rs^4 - 2772rs^3t^3 - 891rs^3t^2 + \right.\\&& \left.2992rs^3t - 1067rs^3 + 2673rs^2t^3 - 2387rs^2t^2 + 407rs^2t + 105rs^2 - 275rst^3 + 506rst^2 - 345r\right.\\&& \left.st + 84rs - 110rt^3 + 132rt^2 - 42rt - 891s^4t^2 + 990s^4t - 297s^4 + 693s^3t^3 + 363s^3t^2 - 1067s^3\right.\\&& \left.t + 399s^3 - 825s^2t^3 + 616s^2t^2 + 105s^2t - 126s^2 + 220st^3 - 264st^2 + 84st)\right.,\\
            B^{[1]}_{132}&=&\frac{hr^5}{1260s^3(r - s)^3(s - t)^3(s - 1)^3}\left.(- 21r^6s^2 + 14r^6st + 14r^6s - 7r^6t + 63r^5s^3 + 14r^5s^2t + 14r^5\right.\\&& \left.s^2 - 40r^5st^2 - 51r^5st - 40r^5s + 20r^5t^2 + 20r^5t - 45r^4s^4 - 150r^4s^3t - 150r^4s^3 + 90r^4s^2t^2 +\right.\\&& \left. 65r^4s^2t + 90r^4s^2 + 30r^4st^3 + 65r^4st^2 + 65r^4st + 30r^4s - 15r^4t^3 - 60r^4t^2 - 15r^4t + 135r^3s^4\right.\\&& \left.t + 135r^3s^4 + 39r^3s^3t^2 + 366r^3s^3t + 39r^3s^3 - 105r^3s^2t^3 - 306r^3s^2t^2 - 306r^3s^2t - 105r^3s^2 -\right.\\&& \left. 30r^3st^3 + 72r^3st^2 - 30r^3st + 48r^3t^3 + 48r^3t^2 - 108r^2s^4t^2 - 432r^2s^4t - 108r^2s^4 + 84r^2s^3t^3\right.\\&& \left. - 66r^2s^3t^2 - 66r^2s^3t + 84r^2s^3 + 294r^2s^2t^3 + 342r^2s^2t^2 + 294r^2s^2t - 138r^2st^3 - 138r^2st^2 - \right.\\&& \left.42r^2t^3 + 378rs^4t^2 + 378rs^4t - 294rs^3t^3 - 126rs^3t^2 - 294rs^3t - 126rs^2t^3 - 126rs^2t^2 + 210\right.\\&& \left.rst^3 - 378s^4t^2 + 294s^3t^3 + 294s^3t^2 - 210s^2t^3)\right.,\\
            B^{[1]}_{142}&=&\frac{hs}{1260(r - s)^3(s - t)^3(s - 1)^3}\left.(315r^3s^6 - 1050r^3s^5t - 1050r^3s^5 + 1164r^3s^4t^2 + 3561r^3s^4t + \right.\\&& \left.1164r^3s^4 - 420r^3s^3t^3 - 4026r^3s^3t^2 - 4026r^3s^3t - 420r^3s^3 + 1470r^3s^2t^3 + 4662r^3s^2t^2 + 1470\right.\\&& \left.r^3s^2t - 1722r^3st^3 - 1722r^3st^2 + 630r^3t^3 - 885r^2s^7 + 2930r^2s^6t + 2930r^2s^6 - 3228r^2s^5t^2 - \right.\\&& \left.9847r^2s^5t - 3228r^2s^5 + 1164r^2s^4t^3 + 11034r^2s^4t^2 + 11034r^2s^4t + 1164r^2s^4 - 4026r^2s^3t^3 -\right.\\&& \left. 12618r^2s^3t^2 - 4026r^2s^3t + 4662r^2s^2t^3 + 4662r^2s^2t^2 - 1722r^2st^3 + 819rs^8 - 2686rs^7t - 2686\right.\\&& \left.rs^7 + 2930rs^6t^2 + 8913rs^6t + 2930rs^6 - 1050rs^5t^3 - 9847rs^5t^2 - 9847rs^5t - 1050rs^5 + 3561\right.\\&& \left.rs^4t^3 + 11034rs^4t^2 + 3561rs^4t - 4026rs^3t^3 - 4026rs^3t^2 + 1470rs^2t^3 - 252s^9 + 819s^8t + 819\right.\\&& \left.s^8 - 885s^7t^2 - 2686s^7t - 885s^7 + 315s^6t^3 + 2930s^6t^2 + 2930s^6t + 315s^6 - 1050s^5t^3 - 3228s^5\right.\\&& \left.t^2 - 1050s^5t + 1164s^4t^3 + 1164s^4t^2 - 420s^3t^3)\right.,\\
            B^{[1]}_{152}&=&\frac{ht^5}{1260s^3(r - s)^3(s - t)^3(s - 1)^3}\left.(84r^3s^3t^2 - 294r^3s^3t + 294r^3s^3 - 105r^3s^2t^3 + 294r^3s^2t^2 - 126\right.\\&& \left.r^3s^2t - 210r^3s^2 + 30r^3st^4 - 30r^3st^3 - 138r^3st^2 + 210r^3st - 15r^3t^4 + 48r^3t^3 - 42r^3t^2 - 108\right.\\
        \end{eqnarray*}
        \begin{eqnarray*}
            && \left.r^2s^4t^2 + 378r^2s^4t - 378r^2s^4 + 39r^2s^3t^3 - 66r^2s^3t^2 - 126r^2s^3t + 294r^2s^3 + 90r^2s^2t^4 - 306r^2\right.\\&& \left.s^2t^3 + 342r^2s^2t^2 - 126r^2s^2t - 40r^2st^5 + 65r^2st^4 + 72r^2st^3 - 138r^2st^2 + 20r^2t^5 - 60r^2t^4 + 48\right.\\&& \left.r^2t^3 + 135rs^4t^3 - 432rs^4t^2 + 378rs^4t - 150rs^3t^4 + 366rs^3t^3 - 66rs^3t^2 - 294rs^3t + 14rs^2t^5 +\right.\\&& \left. 65rs^2t^4 - 306rs^2t^3 + 294rs^2t^2 + 14rst^6 - 51rst^5 + 65rst^4 - 30rst^3 - 7rt^6 + 20rt^5 - 15rt^4 -\right.\\&& \left. 45s^4t^4 + 135s^4t^3 - 108s^4t^2 + 63s^3t^5 - 150s^3t^4 + 39s^3t^3 + 84s^3t^2 - 21s^2t^6 + 14s^2t^5 + 90s^2t^4 -\right.\\&& \left. 105s^2t^3 + 14st^6 - 40st^5 + 30st^4)\right.,\\
            B^{[1]}_{162}&=&\frac{h}{1260s^3(r - s)^3(s - t)^3(s - 1)^3}\left.(294r^3s^3t^2 - 294r^3s^3t + 84r^3s^3 - 210r^3s^2t^3 - 126r^3s^2t^2 + 294\right.\\&& \left.r^3s^2t - 105r^3s^2 + 210r^3st^3 - 138r^3st^2 - 30r^3st + 30r^3s - 42r^3t^3 + 48r^3t^2 - 15r^3t - 378r^2s^4\right.\\&& \left.t^2 + 378r^2s^4t - 108r^2s^4 + 294r^2s^3t^3 - 126r^2s^3t^2 - 66r^2s^3t + 39r^2s^3 - 126r^2s^2t^3 + 342r^2s^2t^2\right.\\&& \left. - 306r^2s^2t + 90r^2s^2 - 138r^2st^3 + 72r^2st^2 + 65r^2st - 40r^2s + 48r^2t^3 - 60r^2t^2 + 20r^2t + 378r\right.\\&& \left.s^4t^2 - 432rs^4t + 135rs^4 - 294rs^3t^3 - 66rs^3t^2 + 366rs^3t - 150rs^3 + 294rs^2t^3 - 306rs^2t^2 + 65\right.\\&& \left.rs^2t + 14rs^2 - 30rst^3 + 65rst^2 - 51rst + 14rs - 15rt^3 + 20rt^2 - 7rt - 108s^4t^2 + 135s^4t - 45\right.\\&& \left.s^4 + 84s^3t^3 + 39s^3t^2 - 150s^3t + 63s^3 - 105s^2t^3 + 90s^2t^2 + 14s^2t - 21s^2 + 30st^3 - 40st^2 + 14st)\right.,\\
            B^{[1]}_{13}&=&\frac{-h^4r^8}{2162160t^3(r - t)^3(s - t)^3(t - 1)^3}\left.(140r^6st - 70r^6s - 210r^6t^2 + 140r^6t - 520r^5s^2t + 260r^5s^2 + \right.\\&& \left.245r^5st^2 - 705r^5st + 260r^5s + 735r^5t^3 + 245r^5t^2 - 520r^5t + 520r^4s^3t - 260r^4s^3 + 1300r^4s^2t^2 +\right.\\&& \left. 1300r^4s^2t - 1040r^4s^2 - 2405r^4st^3 + 715r^4st^2 + 1300r^4st - 260r^4s - 585r^4t^4 - 2405r^4t^3 + 1300\right.\\&& \left.r^4t^2 + 520r^4t - 2210r^3s^3t^2 - 910r^3s^3t + 1144r^3s^3 + 1222r^3s^2t^3 - 6318r^3s^2t^2 + 936r^3s^2t + 1144\right.\\&& \left.r^3s^2 + 2340r^3st^4 + 8528r^3st^3 - 6318r^3st^2 - 910r^3st + 2340r^3t^4 + 1222r^3t^3 - 2210r^3t^2 + 2002r^2\right.\\&& \left.s^3t^3 + 9152r^2s^3t^2 - 3718r^2s^3t - 1430r^2s^3 - 2574r^2s^2t^4 - 4576r^2s^2t^3 + 11154r^2s^2t^2 - 3718r^2s^2t\right.\\&& \left. - 10296r^2st^4 - 4576r^2st^3 + 9152r^2st^2 - 2574r^2t^4 + 2002r^2t^3 - 10010rs^3t^3 - 7865rs^3t^2 + 9295rs^3\right.\\&& \left.t + 12870rs^2t^4 + 715rs^2t^3 - 7865rs^2t^2 + 12870rst^4 - 10010rst^3 + 15015s^3t^3 - 10725s^3t^2 - 19305\right.\\&& \left.s^2t^4 + 15015s^2t^3)\right.,\\
            B^{[1]}_{23}&=&\frac{-h^4s^8}{2162160t^3(r - t)^3(s - t)^3(t - 1)^3}\left. (520r^3s^4t - 260r^3s^4 - 2210r^3s^3t^2 - 910r^3s^3t + 1144r^3s^3 + 2002\right.\\&& \left.r^3s^2t^3 + 9152r^3s^2t^2 - 3718r^3s^2t - 1430r^3s^2 - 10010r^3st^3 - 7865r^3st^2 + 9295r^3st + 15015r^3t^3 - \right.\\&& \left.10725r^3t^2 - 520r^2s^5t + 260r^2s^5 + 1300r^2s^4t^2 + 1300r^2s^4t - 1040r^2s^4 + 1222r^2s^3t^3 - 6318r^2s^3t^2\right.\\&& \left. + 936r^2s^3t + 1144r^2s^3 - 2574r^2s^2t^4 - 4576r^2s^2t^3 + 11154r^2s^2t^2 - 3718r^2s^2t + 12870r^2st^4 + 715\right.\\&& \left.r^2st^3 - 7865r^2st^2 - 19305r^2t^4 + 15015r^2t^3 + 140rs^6t - 70rs^6 + 245rs^5t^2 - 705rs^5t + 260rs^5 -\right.\\&& \left. 2405rs^4t^3 + 715rs^4t^2 + 1300rs^4t - 260rs^4 + 2340rs^3t^4 + 8528rs^3t^3 - 6318rs^3t^2 - 910rs^3t - 10296\right.\\&& \left.rs^2t^4 - 4576rs^2t^3 + 9152rs^2t^2 + 12870rst^4 - 10010rst^3 - 210s^6t^2 + 140s^6t + 735s^5t^3 + 245s^5t^2 -\right.\\&& \left. 520s^5t - 585s^4t^4 - 2405s^4t^3 + 1300s^4t^2 + 520s^4t + 2340s^3t^4 + 1222s^3t^3 - 2210s^3t^2 - 2574s^2t^4 +\right.\\&& \left. 2002s^2t^3)\right.,\\
            B^{[1]}_{33}&=&\frac{-h^4t^4}{2162160(r - t)^3(s - t)^3(t - 1)^3}\left. (- 3575r^3s^3t^3 + 17875r^3s^3t^2 - 30030r^3s^3t + 12870r^3s^3 + 8437r^3s^2t^4\right.\\&& \left. - 41041r^3s^2t^3 + 67210r^3s^2t^2 - 30030r^3s^2t - 5915r^3st^5 + 27053r^3st^4 - 41041r^3st^3 + 17875r^3st^2 +\right.\\
            && \left. 1365r^3t^6 - 5915r^3t^5 + 8437r^3t^4 - 3575r^3t^3 + 8437r^2s^3t^4 - 41041r^2s^3t^3 + 67210r^2s^3t^2 - 30030\right.\\&& \left.r^2s^3t - 19799r^2s^2t^5 + 93483r^2s^2t^4 - 148434r^2s^2t^3 + 67210r^2s^2t^2 + 14105r^2st^6 - 63011r^2st^5 +\right.\\&& \left. 93483r^2st^4 - 41041r^2st^3 - 3315r^2t^7 + 14105r^2t^6 - 19799r^2t^5 + 8437r^2t^4 - 5915rs^3t^5 + 27053r\right.\\&& \left.s^3t^4 - 41041rs^3t^3 + 17875rs^3t^2 + 14105rs^2t^6 - 63011rs^2t^5 + 93483rs^2t^4 - 41041rs^2t^3 - 10390\right.\\&& \left.rst^7 + 44520rst^6 - 63011rst^5 + 27053rst^4 + 2520rt^8 - 10390rt^7 + 14105rt^6 - 5915rt^5 + 1365s^3\right.\\&& \left.t^6 - 5915s^3t^5 + 8437s^3t^4 - 3575s^3t^3 - 3315s^2t^7 + 14105s^2t^6 - 19799s^2t^5 + 8437s^2t^4 + 2520st^8\right.\\&& \left.- 10390st^7 + 14105st^6 - 5915st^5 - 630t^9 + 2520t^8 - 3315t^7 + 1365t^6)\right.,\\
            B^{[1]}_{43}&=&\frac{-h^4}{2162160t^3(r - t)^3(s - t)^3(t - 1)^3}\left.(- 10725r^3s^3t^2 + 9295r^3s^3t - 1430r^3s^3 + 15015r^3s^2t^3 - 7865\right.\\
        \end{eqnarray*}
        \begin{eqnarray*}
            && \left.r^3s^2t^2 - 3718r^3s^2t + 1144r^3s^2 - 10010r^3st^3 + 9152r^3st^2 - 910r^3st - 260r^3s + 2002r^3t^3 - 2210\right.\\&& \left.r^3t^2 + 520r^3t + 15015r^2s^3t^3 - 7865r^2s^3t^2 - 3718r^2s^3t + 1144r^2s^3 - 19305r^2s^2t^4 + 715r^2s^2t^3 + \right.\\&& \left.11154r^2s^2t^2 + 936r^2s^2t - 1040r^2s^2 + 12870r^2st^4 - 4576r^2st^3 - 6318r^2st^2 + 1300r^2st + 260r^2s\right.\\&& \left. - 2574r^2t^4 + 1222r^2t^3 + 1300r^2t^2 - 520r^2t - 10010rs^3t^3 + 9152rs^3t^2 - 910rs^3t - 260rs^3 + 12870\right.\\&& \left.rs^2t^4 - 4576rs^2t^3 - 6318rs^2t^2 + 1300rs^2t + 260rs^2 - 10296rst^4 + 8528rst^3 + 715rst^2 - 705rst -\right.\\&& \left. 70rs + 2340rt^4 - 2405rt^3 + 245rt^2 + 140rt + 2002s^3t^3 - 2210s^3t^2 + 520s^3t - 2574s^2t^4 + 1222s^2\right.\\&& \left.t^3 + 1300s^2t^2 - 520s^2t + 2340st^4 - 2405st^3 + 245st^2 + 140st - 585t^4 + 735t^3 - 210t^2)\right.,\\
            B^{[1]}_{53}&=&\frac{ h^3r^7}{27720t^3(r - t)^3(s - t)^3(t - 1)^3}\left.(- 14r^6st + 7r^6s + 21r^6t^2 - 14r^6t + 48r^5s^2t - 24r^5s^2 - 21r^5st^2 +\right.\\&& \left. 64r^5st - 24r^5s - 70r^5t^3 - 21r^5t^2 + 48r^5t - 44r^4s^3t + 22r^4s^3 - 116r^4s^2t^2 - 106r^4s^2t + 88r^4s^2 +\right.\\&& \left. 208r^4st^3 - 70r^4st^2 - 106r^4st + 22r^4s + 54r^4t^4 + 208r^4t^3 - 116r^4t^2 - 44r^4t + 176r^3s^3t^2 + 66r^3s^3\right.\\&& \left.t - 88r^3s^3 - 88r^3s^2t^3 + 506r^3s^2t^2 - 88r^3s^2t - 88r^3s^2 - 198r^3st^4 - 660r^3st^3 + 506r^3st^2 + 66r^3st\right.\\&& \left. - 198r^3t^4 - 88r^3t^3 + 176r^3t^2 - 154r^2s^3t^3 - 649r^2s^3t^2 + 275r^2s^3t + 99r^2s^3 + 198r^2s^2t^4 + 275r^2s^2\right.\\&& \left.t^3 - 781r^2s^2t^2 + 275r^2s^2t + 792r^2st^4 + 275r^2st^3 - 649r^2st^2 + 198r^2t^4 - 154r^2t^3 + 693rs^3t^3 + 462\right.\\&& \left.rs^3t^2 - 594rs^3t - 891rs^2t^4 + 66rs^2t^3 + 462rs^2t^2 - 891rst^4 + 693rst^3 - 924s^3t^3 + 660s^3t^2 + 1188\right.\\&& \left.s^2t^4 - 924s^2t^3)\right.,\\
            B^{[1]}_{63}&=&\frac{ -h^3s^7}{27720t^3(r - t)^3(s - t)^3(t - 1)^3}\left. (44r^3s^4t - 22r^3s^4 - 176r^3s^3t^2 - 66r^3s^3t + 88r^3s^3 + 154r^3s^2t^3 +\right.\\&& \left. 649r^3s^2t^2 - 275r^3s^2t - 99r^3s^2 - 693r^3st^3 - 462r^3st^2 + 594r^3st + 924r^3t^3 - 660r^3t^2 - 48r^2s^5t +\right.\\&& \left. 24r^2s^5 + 116r^2s^4t^2 + 106r^2s^4t - 88r^2s^4 + 88r^2s^3t^3 - 506r^2s^3t^2 + 88r^2s^3t + 88r^2s^3 - 198r^2s^2t^4 - \right.\\&& \left.275r^2s^2t^3 + 781r^2s^2t^2 - 275r^2s^2t + 891r^2st^4 - 66r^2st^3 - 462r^2st^2 - 1188r^2t^4 + 924r^2t^3 + 14rs^6\right.\\&& \left.t - 7rs^6 + 21rs^5t^2 - 64rs^5t + 24rs^5 - 208rs^4t^3 + 70rs^4t^2 + 106rs^4t - 22rs^4 + 198rs^3t^4 + 660rs^3\right.\\&& \left.t^3 - 506rs^3t^2 - 66rs^3t - 792rs^2t^4 - 275rs^2t^3 + 649rs^2t^2 + 891rst^4 - 693rst^3 - 21s^6t^2 + 14s^6t + \right.\\&& \left.70s^5t^3 + 21s^5t^2 - 48s^5t - 54s^4t^4 - 208s^4t^3 + 116s^4t^2 + 44s^4t + 198s^3t^4 + 88s^3t^3 - 176s^3t^2 - 198\right.\\&& \left.s^2t^4 + 154s^2t^3)\right.,\\
            B^{[1]}_{73}&=&\frac{-h^3t^3}{27720(r - t)^3(s - t)^3(t - 1)^3}\left.(- 330r^3s^3t^3 + 1485r^3s^3t^2 - 2244r^3s^3t + 924r^3s^3 + 814r^3s^2t^4 - 3575\right.\\&& \left.r^3s^2t^3 + 5280r^3s^2t^2 - 2244r^3s^2t - 616r^3st^5 + 2574r^3st^4 - 3575r^3st^3 + 1485r^3st^2 + 154r^3t^6 - 616\right.\\&& \left.r^3t^5 + 814r^3t^4 - 330r^3t^3 + 814r^2s^3t^4 - 3575r^2s^3t^3 + 5280r^2s^3t^2 - 2244r^2s^3t - 2002r^2s^2t^5 + 8569\right.\\&& \left.r^2s^2t^4 - 12320r^2s^2t^3 + 5280r^2s^2t^2 + 1536r^2st^6 - 6290r^2st^5 + 8569r^2st^4 - 3575r^2st^3 - 390r^2t^7 + \right.\\&& \left.1536r^2t^6 - 2002r^2t^5 + 814r^2t^4 - 616rs^3t^5 + 2574rs^3t^4 - 3575rs^3t^3 + 1485rs^3t^2 + 1536rs^2t^6 - 6290\right.\\&& \left.rs^2t^5 + 8569rs^2t^4 - 3575rs^2t^3 - 1210rst^7 + 4793rst^6 - 6290rst^5 + 2574rst^4 + 315rt^8 - 1210rt^7 +\right.\\&& \left. 1536rt^6 - 616rt^5 + 154s^3t^6 - 616s^3t^5 + 814s^3t^4 - 330s^3t^3 - 390s^2t^7 + 1536s^2t^6 - 2002s^2t^5 + 814s^2\right.\\&& \left.t^4 + 315st^8 - 1210st^7 + 1536st^6 - 616st^5 - 84t^9 + 315t^8 - 390t^7 + 154t^6)\right.,\\
            B^{[1]}_{83}&=&\frac{ h^3}{27720t^3(r - t)^3(s - t)^3(t - 1)^3}\left. (660r^3s^3t^2 - 594r^3s^3t + 99r^3s^3 - 924r^3s^2t^3 + 462r^3s^2t^2 + 275r^3s^2t\right.\\&& \left. - 88r^3s^2 + 693r^3st^3 - 649r^3st^2 + 66r^3st + 22r^3s - 154r^3t^3 + 176r^3t^2 - 44r^3t - 924r^2s^3t^3 + 462r^2s^3\right.\\&& \left.t^2 + 275r^2s^3t - 88r^2s^3 + 1188r^2s^2t^4 + 66r^2s^2t^3 - 781r^2s^2t^2 - 88r^2s^2t + 88r^2s^2 - 891r^2st^4 + 275r^2\right.\\&& \left.st^3 + 506r^2st^2 - 106r^2st - 24r^2s + 198r^2t^4 - 88r^2t^3 - 116r^2t^2 + 48r^2t + 693rs^3t^3 - 649rs^3t^2 + 66r\right.\\&& \left.s^3t + 22rs^3 - 891rs^2t^4 + 275rs^2t^3 + 506rs^2t^2 - 106rs^2t - 24rs^2 + 792rst^4 - 660rst^3 - 70rst^2 + 64\right.\\ 
            && \left.rst + 7rs - 198rt^4 + 208rt^3 - 21rt^2 - 14rt - 154s^3t^3 + 176s^3t^2 - 44s^3t + 198s^2t^4 - 88s^2t^3 - \right.\\&& \left.116s^2t^2 + 48s^2t - 198st^4 + 208st^3 - 21st^2 - 14st + 54t^4 - 70t^3 + 21t^2)\right.,\\
            B^{[1]}_{93}&=&\frac{ h^2r^6}{27720t^3(r - t)^3(s - t)^3(t - 1)^3}\left. (- 84r^6st + 42r^6s + 126r^6t^2 - 84r^6t + 264r^5s^2t - 132r^5s^2 -\right.\\&& \left. 105r^5st^2 + 345r^5st - 132r^5s - 399r^5t^3 - 105r^5t^2 + 264r^5t - 220r^4s^3t + 110r^4s^3 - 616r^4s^2t^2\right.\\&& \left. - 506r^4s^2t + 440r^4s^2 + 1067r^4st^3 - 407r^4st^2 - 506r^4st + 110r^4s + 297r^4t^4 + 1067r^4t^3 - 616\right.\\
        \end{eqnarray*}
        \begin{eqnarray*}
            && \left.r^4t^2 - 220r^4t + 825r^3s^3t^2 + 275r^3s^3t - 396r^3s^3 - 363r^3s^2t^3 + 2387r^3s^2t^2 - 484r^3s^2t - 396r^3\right.\\&& \left.s^2 - 990r^3st^4 - 2992r^3st^3 + 2387r^3st^2 + 275r^3st - 990r^3t^4 - 363r^3t^3 + 825r^3t^2 - 693r^2s^3t^3\right.\\&& \left. - 2673r^2s^3t^2 + 1188r^2s^3t + 396r^2s^3 + 891r^2s^2t^4 + 891r^2s^2t^3 - 3168r^2s^2t^2 + 1188r^2s^2t + 3564\right.\\&& \left.r^2st^4 + 891r^2st^3 - 2673r^2st^2 + 891r^2t^4 - 693r^2t^3 + 2772rs^3t^3 + 1518rs^3t^2 - 2178rs^3t - 3564\right.\\&& \left.rs^2t^4 + 726rs^2t^3 + 1518rs^2t^2 - 3564rst^4 + 2772rst^3 - 3234s^3t^3 + 2310s^3t^2 + 4158s^2t^4 - 3234\right.\\&& \left.s^2t^3)\right.,\\
            B^{[1]}_{103}&=&\frac{-h^2s^6}{27720t^3(r - t)^3(s - t)^3(t - 1)^3}\left.(220r^3s^4t - 110r^3s^4 - 825r^3s^3t^2 - 275r^3s^3t + 396r^3s^3 + 693r^3\right.\\&& \left.s^2t^3 + 2673r^3s^2t^2 - 1188r^3s^2t - 396r^3s^2 - 2772r^3st^3 - 1518r^3st^2 + 2178r^3st + 3234r^3t^3 - 2310\right.\\&& \left.r^3t^2 - 264r^2s^5t + 132r^2s^5 + 616r^2s^4t^2 + 506r^2s^4t - 440r^2s^4 + 363r^2s^3t^3 - 2387r^2s^3t^2 + 484r^2\right.\\&& \left.s^3t + 396r^2s^3 - 891r^2s^2t^4 - 891r^2s^2t^3 + 3168r^2s^2t^2 - 1188r^2s^2t + 3564r^2st^4 - 726r^2st^3 - 1518\right.\\&& \left.r^2st^2 - 4158r^2t^4 + 3234r^2t^3 + 84rs^6t - 42rs^6 + 105rs^5t^2 - 345rs^5t + 132rs^5 - 1067rs^4t^3 + 407\right.\\&& \left.rs^4t^2 + 506rs^4t - 110rs^4 + 990rs^3t^4 + 2992rs^3t^3 - 2387rs^3t^2 - 275rs^3t - 3564rs^2t^4 - 891rs^2t^3\right.\\&& \left. + 2673rs^2t^2 + 3564rst^4 - 2772rst^3 - 126s^6t^2 + 84s^6t + 399s^5t^3 + 105s^5t^2 - 264s^5t - 297s^4t^4 -\right.\\&& \left. 1067s^4t^3 + 616s^4t^2 + 220s^4t + 990s^3t^4 + 363s^3t^3 - 825s^3t^2 - 891s^2t^4 + 693s^2t^3)\right.,\\
            B^{[1]}_{113}&=&\frac{-h^2t^2}{27720(r - t)^3(s - t)^3(t - 1)^3}\left.  (- 1980r^3s^3t^3 + 7920r^3s^3t^2 - 10626r^3s^3t + 4158r^3s^3 + 5148r^3s^2t^4\right.\\&& \left. - 20196r^3s^2t^3 + 26598r^3s^2t^2 - 10626r^3s^2t - 4235r^3st^5 + 16027r^3st^4 - 20196r^3st^3 + 7920r^3st^2\right.\\&& \left. + 1155r^3t^6 - 4235r^3t^5 + 5148r^3t^4 - 1980r^3t^3 + 5148r^2s^3t^4 - 20196r^2s^3t^3 + 26598r^2s^3t^2 - 10626\right.\\&& \left.r^2s^3t - 13376r^2s^2t^5 + 51436r^2s^2t^4 - 66330r^2s^2t^3 + 26598r^2s^2t^2 + 11121r^2st^6 - 41437r^2st^5 +\right.\\&& \left. 51436r^2st^4 - 20196r^2st^3 - 3069r^2t^7 + 11121r^2t^6 - 13376r^2t^5 + 5148r^2t^4 - 4235rs^3t^5 + 16027r\right.\\&& \left.s^3t^4 - 20196rs^3t^3 + 7920rs^3t^2 + 11121rs^2t^6 - 41437rs^2t^5 + 51436rs^2t^4 - 20196rs^2t^3 - 9420rs\right.\\&& \left.t^7 + 34278rst^6 - 41437rst^5 + 16027rst^4 + 2646rt^8 - 9420rt^7 + 11121rt^6 - 4235rt^5 + 1155s^3t^6 -\right.\\&& \left. 4235s^3t^5 + 5148s^3t^4 - 1980s^3t^3 - 3069s^2t^7 + 11121s^2t^6 - 13376s^2t^5 + 5148s^2t^4 + 2646st^8 -\right.\\&& \left. 9420st^7 + 11121st^6 - 4235st^5 - 756t^9 + 2646t^8 - 3069t^7 + 1155t^6)\right.,\\
            B^{[1]}_{123}&=&\frac{h^2}{27720t^3(r - t)^3(s - t)^3(t - 1)^3}\left. (2310r^3s^3t^2 - 2178r^3s^3t + 396r^3s^3 - 3234r^3s^2t^3 + 1518r^3s^2t^2 + \right.\\&& \left.1188r^3s^2t - 396r^3s^2 + 2772r^3st^3 - 2673r^3st^2 + 275r^3st + 110r^3s - 693r^3t^3 + 825r^3t^2 - 220r^3t\right.\\&& \left. - 3234r^2s^3t^3 + 1518r^2s^3t^2 + 1188r^2s^3t - 396r^2s^3 + 4158r^2s^2t^4 + 726r^2s^2t^3 - 3168r^2s^2t^2 - 484\right.\\&& \left.r^2s^2t + 440r^2s^2 - 3564r^2st^4 + 891r^2st^3 + 2387r^2st^2 - 506r^2st - 132r^2s + 891r^2t^4 - 363r^2t^3 - \right.\\&& \left.616r^2t^2 + 264r^2t + 2772rs^3t^3 - 2673rs^3t^2 + 275rs^3t + 110rs^3 - 3564rs^2t^4 + 891rs^2t^3 + 2387rs^2\right.\\&& \left.t^2 - 506rs^2t - 132rs^2 + 3564rst^4 - 2992rst^3 - 407rst^2 + 345rst + 42rs - 990rt^4 + 1067rt^3 -\right.\\&& \left. 105rt^2 - 84rt - 693s^3t^3 + 825s^3t^2 - 220s^3t + 891s^2t^4 - 363s^2t^3 - 616s^2t^2 + 264s^2t - 990st^4 +\right.\\&& \left. 1067st^3 - 105st^2 - 84st + 297t^4 - 399t^3 + 126t^2)\right.,\\
            B^{[1]}_{133}&=&\frac{hr^5}{1260t^3(r - t)^3(s - t)^3(t - 1)^3}\left. (- 14r^6st + 7r^6s + 21r^6t^2 - 14r^6t + 40r^5s^2t - 20r^5s^2 - 14r^5st^2 +\right.\\&& \left. 51r^5st - 20r^5s - 63r^5t^3 - 14r^5t^2 + 40r^5t - 30r^4s^3t + 15r^4s^3 - 90r^4s^2t^2 - 65r^4s^2t + 60r^4s^2 + \right.\\&& \left.150r^4st^3 - 65r^4st^2 - 65r^4st + 15r^4s + 45r^4t^4 + 150r^4t^3 - 90r^4t^2 - 30r^4t + 105r^3s^3t^2 + 30r^3s^3t\right.\\&& \left. - 48r^3s^3 - 39r^3s^2t^3 + 306r^3s^2t^2 - 72r^3s^2t - 48r^3s^2 - 135r^3st^4 - 366r^3st^3 + 306r^3st^2 + 30r^3st\right.\\&& \left. - 135r^3t^4 - 39r^3t^3 + 105r^3t^2 - 84r^2s^3t^3 - 294r^2s^3t^2 + 138r^2s^3t + 42r^2s^3 + 108r^2s^2t^4 + 66r^2s^2\right.\\&& \left.t^3 - 342r^2s^2t^2 + 138r^2s^2t + 432r^2st^4 + 66r^2st^3 - 294r^2st^2 + 108r^2t^4 - 84r^2t^3 + 294rs^3t^3 + 126\right.\\&& \left.rs^3t^2 - 210rs^3t - 378rs^2t^4 + 126rs^2t^3 + 126rs^2t^2 - 378\right.\\&& \left.rst^4 + 294rst^3 - 294s^3t^3 + 210s^3t^2 + 378s^2t^4 - 294s^2t^3)\right.,\\
        \end{eqnarray*}
        \begin{eqnarray*}
            B^{[1]}_{143}&=&\frac{-hs^5}{1260t^3(r - t)^3(s - t)^3(t - 1)^3}\left.  (30r^3s^4t - 15r^3s^4 - 105r^3s^3t^2 - 30r^3s^3t + 48r^3s^3 + 84r^3s^2t^3 +\right.\\&& \left. 294r^3s^2t^2 - 138r^3s^2t - 42r^3s^2 - 294r^3st^3 - 126r^3st^2 + 210r^3st + 294r^3t^3 - 210r^3t^2 - 40r^2s^5\right.\\&& \left.t + 20r^2s^5 + 90r^2s^4t^2 + 65r^2s^4t - 60r^2s^4 + 39r^2s^3t^3 - 306r^2s^3t^2 + 72r^2s^3t + 48r^2s^3 - 108r^2\right.\\&& \left.s^2t^4 - 66r^2s^2t^3 + 342r^2s^2t^2 - 138r^2s^2t + 378r^2st^4 - 126r^2st^3 - 126r^2st^2 - 378r^2t^4 + 294r^2\right.\\&& \left.t^3 + 14rs^6t - 7rs^6 + 14rs^5t^2 - 51rs^5t + 20rs^5 - 150rs^4t^3 + 65rs^4t^2 + 65rs^4t - 15rs^4 + 135\right.\\&& \left.rs^3t^4 + 366rs^3t^3 - 306rs^3t^2 - 30rs^3t - 432rs^2t^4 - 66rs^2t^3 + 294rs^2t^2 + 378rst^4 - 294rst^3 -\right.\\&& \left. 21s^6t^2 + 14s^6t + 63s^5t^3 + 14s^5t^2 - 40s^5t - 45s^4t^4 - 150s^4t^3 + 90s^4t^2 + 30s^4t + 135s^3t^4 + 39\right.\\&& \left.s^3t^3 - 105s^3t^2 - 108s^2t^4 + 84s^2t^3)\right.,\\
            B^{[1]}_{153}&=&\frac{ -ht}{1260(r - t)^3(s - t)^3(t - 1)^3}\left. (- 420r^3s^3t^3 + 1470r^3s^3t^2 - 1722r^3s^3t + 630r^3s^3 + 1164r^3s^2t^4 - \right.\\&& \left.4026r^3s^2t^3 + 4662r^3s^2t^2 - 1722r^3s^2t - 1050r^3st^5 + 3561r^3st^4 - 4026r^3st^3 + 1470r^3st^2 + 315\right.\\&& \left.r^3t^6 - 1050r^3t^5 + 1164r^3t^4 - 420r^3t^3 + 1164r^2s^3t^4 - 4026r^2s^3t^3 + 4662r^2s^3t^2 - 1722r^2s^3t -\right.\\&& \left. 3228r^2s^2t^5 + 11034r^2s^2t^4 - 12618r^2s^2t^3 + 4662r^2s^2t^2 + 2930r^2st^6 - 9847r^2st^5 + 11034r^2st^4 - \right.\\&& \left.4026r^2st^3 - 885r^2t^7 + 2930r^2t^6 - 3228r^2t^5 + 1164r^2t^4 - 1050rs^3t^5 + 3561rs^3t^4 - 4026rs^3t^3 +\right.\\&& \left. 1470rs^3t^2 + 2930rs^2t^6 - 9847rs^2t^5 + 11034rs^2t^4 - 4026rs^2t^3 - 2686rst^7 + 8913rst^6 - 9847r\right.\\&& \left.st^5 + 3561rst^4 + 819rt^8 - 2686rt^7 + 2930rt^6 - 1050rt^5 + 315s^3t^6 - 1050s^3t^5 + 1164s^3t^4 - 420\right.\\&& \left.s^3t^3 - 885s^2t^7 + 2930s^2t^6 - 3228s^2t^5 + 1164s^2t^4 + 819st^8 - 2686st^7 + 2930st^6 - 1050st^5 - \right.\\&& \left.252t^9 + 819t^8 - 885t^7 + 315t^6)\right.,\\
            B^{[1]}_{163}&=&\frac{h}{1260t^3(r - t)^3(s - t)^3(t - 1)^3}\left. (210r^3s^3t^2 - 210r^3s^3t + 42r^3s^3 - 294r^3s^2t^3 + 126r^3s^2t^2 + 138\right.\\&& \left.r^3s^2t - 48r^3s^2 + 294r^3st^3 - 294r^3st^2 + 30r^3st + 15r^3s - 84r^3t^3 + 105r^3t^2 - 30r^3t - 294r^2s^3\right.\\&& \left.t^3 + 126r^2s^3t^2 + 138r^2s^3t - 48r^2s^3 + 378r^2s^2t^4 + 126r^2s^2t^3 - 342r^2s^2t^2 - 72r^2s^2t + 60r^2s^2\right.\\&& \left. - 378r^2st^4 + 66r^2st^3 + 306r^2st^2 - 65r^2st - 20r^2s + 108r^2t^4 - 39r^2t^3 - 90r^2t^2 + 40r^2t + 294\right.\\&& \left.rs^3t^3 - 294rs^3t^2 + 30rs^3t + 15rs^3 - 378rs^2t^4 + 66rs^2t^3 + 306rs^2t^2 - 65rs^2t - 20rs^2 + 432r\right.\\&& \left.st^4 - 366rst^3 - 65rst^2 + 51rst + 7rs - 135rt^4 + 150rt^3 - 14rt^2 - 14rt - 84s^3t^3 + 105s^3t^2 - \right.\\&& \left.30s^3t + 108s^2t^4 - 39s^2t^3 - 90s^2t^2 + 40s^2t - 135st^4 + 150st^3 - 14st^2 - 14st + 45t^4 - 63t^3 +\right.\\&& \left. 21t^2)\right.,\\
            B^{[1]}_{14}&=&\frac{h^4r^8}{2162160(r - 1)^3(s - 1)^3(t - 1)^3}\left. (- 70r^6st + 140r^6s + 140r^6t - 210r^6 + 260r^5s^2t - 520r^5s^2\right.\\&& \left. + 260r^5st^2 - 705r^5st + 245r^5s - 520r^5t^2 + 245r^5t + 735r^5 - 260r^4s^3t + 520r^4s^3 - 1040r^4s^2\right.\\&& \left.t^2 + 1300r^4s^2t + 1300r^4s^2 - 260r^4st^3 + 1300r^4st^2 + 715r^4st - 2405r^4s + 520r^4t^3 + 1300r^4\right.\\&& \left.t^2 - 2405r^4t - 585r^4 + 1144r^3s^3t^2 - 910r^3s^3t - 2210r^3s^3 + 1144r^3s^2t^3 + 936r^3s^2t^2 - 6318\right.\\&& \left.r^3s^2t + 1222r^3s^2 - 910r^3st^3 - 6318r^3st^2 + 8528r^3st + 2340r^3s - 2210r^3t^3 + 1222r^3t^2 + 2340\right.\\&& \left.r^3t - 1430r^2s^3t^3 - 3718r^2s^3t^2 + 9152r^2s^3t + 2002r^2s^3 - 3718r^2s^2t^3 + 11154r^2s^2t^2 - 4576r^2\right.\\&& \left.s^2t - 2574r^2s^2 + 9152r^2st^3 - 4576r^2st^2 - 10296r^2st + 2002r^2t^3 - 2574r^2t^2 + 9295rs^3t^3 -\right.\\&& \left. 7865rs^3t^2 - 10010rs^3t - 7865rs^2t^3 + 715rs^2t^2 + 12870rs^2t - 10010rst^3 + 12870rst^2 - 10725\right.\\&& \left.s^3t^3 + 15015s^3t^2 + 15015s^2t^3 - 19305s^2t^2)\right.,\\
            B^{[1]}_{24}&=&\frac{h^4s^8}{2162160(r - 1)^3(s - 1)^3(t - 1)^3}\left. (- 260r^3s^4t + 520r^3s^4 + 1144r^3s^3t^2 - 910r^3s^3t - 2210r^3s^3 -\right.\\&& \left. 1430r^3s^2t^3 - 3718r^3s^2t^2 + 9152r^3s^2t + 2002r^3s^2 + 9295r^3st^3 - 7865r^3st^2 - 10010r^3st - \right.\\&& \left.10725r^3t^3 + 15015r^3t^2 + 260r^2s^5t - 520r^2s^5 - 1040r^2s^4t^2 + 1300r^2s^4t + 1300r^2s^4 + 1144r^2\right.\\&& \left.s^3t^3 + 936r^2s^3t^2 - 6318r^2s^3t + 1222r^2s^3 - 3718r^2s^2t^3 + 11154r^2s^2t^2 - 4576r^2s^2t - 2574r^2\right.\\&& \left.s^2 - 7865r^2st^3 + 715r^2st^2 + 12870r^2st + 15015r^2t^3 - 19305r^2t^2 - 70rs^6t + 140rs^6 + 260rs^5\right.\\&& \left.t^2 - 705rs^5t + 245rs^5 - 260rs^4t^3 + 1300rs^4t^2 + 715rs^4t - 2405rs^4 - 910rs^3t^3 - 6318rs^3t^2 +\right.\\&& \left. 8528rs^3t + 2340rs^3 + 9152rs^2t^3 - 4576rs^2t^2 - 10296rs^2t - 10010rst^3 + 12870rst^2 + 140s^6t\right.\\
        \end{eqnarray*}
        \begin{eqnarray*}
            && \left. - 210s^6 - 520s^5t^2 + 245s^5t + 735s^5 + 520s^4t^3 + 1300s^4t^2 - 2405s^4t - 585s^4 - 2210s^3t^3 + \right.\\&& \left.1222s^3t^2 + 2340s^3t + 2002s^2t^3 - 2574s^2t^2)\right.,\\
            B^{[1]}_{34}&=&\frac{h^4t^8}{2162160(r - 1)^3(s - 1)^3(t - 1)^3}\left. (- 1430r^3s^3t^2 + 9295r^3s^3t - 10725r^3s^3 + 1144r^3s^2t^3 - 3718\right.\\
            && \left.r^3s^2t^2 - 7865r^3s^2t + 15015r^3s^2 - 260r^3st^4 - 910r^3st^3 + 9152r^3st^2 - 10010r^3st + 520r^3t^4 -\right.\\&& \left. 2210r^3t^3 + 2002r^3t^2 + 1144r^2s^3t^3 - 3718r^2s^3t^2 - 7865r^2s^3t + 15015r^2s^3 - 1040r^2s^2t^4 + 936\right.\\&& \left.r^2s^2t^3 + 11154r^2s^2t^2 + 715r^2s^2t - 19305r^2s^2 + 260r^2st^5 + 1300r^2st^4 - 6318r^2st^3 - 4576r^2s\right.\\&& \left.t^2 + 12870r^2st - 520r^2t^5 + 1300r^2t^4 + 1222r^2t^3 - 2574r^2t^2 - 260rs^3t^4 - 910rs^3t^3 + 9152rs^3\right.\\&& \left.t^2 - 10010rs^3t + 260rs^2t^5 + 1300rs^2t^4 - 6318rs^2t^3 - 4576rs^2t^2 + 12870rs^2t - 70rst^6 - 705\right.\\&& \left.rst^5 + 715rst^4 + 8528rst^3 - 10296rst^2 + 140rt^6 + 245rt^5 - 2405rt^4 + 2340rt^3 + 520s^3t^4 -\right.\\&& \left. 2210s^3t^3 + 2002s^3t^2 - 520s^2t^5 + 1300s^2t^4 + 1222s^2t^3 - 2574s^2t^2 + 140st^6 + 245st^5 - 2405s\right.\\&& \left.t^4 + 2340st^3 - 210t^6 + 735t^5 - 585t^4)\right.,\\
            B^{[1]}_{44}&=&\frac{h^4}{2162160(r - 1)^3(s - 1)^3(t - 1)^3}\left.    (12870r^3s^3t^3 - 30030r^3s^3t^2 + 17875r^3s^3t - 3575r^3s^3 - \right.\\&& \left.30030r^3s^2t^3 + 67210r^3s^2t^2 - 41041r^3s^2t + 8437r^3s^2 + 17875r^3st^3 - 41041r^3st^2 + 27053r^3\right.\\&& \left.st - 5915r^3s - 3575r^3t^3 + 8437r^3t^2 - 5915r^3t + 1365r^3 - 30030r^2s^3t^3 + 67210r^2s^3t^2 - \right.\\&& \left.41041r^2s^3t + 8437r^2s^3 + 67210r^2s^2t^3 - 148434r^2s^2t^2 + 93483r^2s^2t - 19799r^2s^2 - 41041r^2\right.\\&& \left.st^3 + 93483r^2st^2 - 63011r^2st + 14105r^2s + 8437r^2t^3 - 19799r^2t^2 + 14105r^2t - 3315r^2 +\right.\\&& \left. 17875rs^3t^3 - 41041rs^3t^2 + 27053rs^3t - 5915rs^3 - 41041rs^2t^3 + 93483rs^2t^2 - 63011rs^2t + \right.\\&& \left.14105rs^2 + 27053rst^3 - 63011rst^2 + 44520rst - 10390rs - 5915rt^3 + 14105rt^2 - 10390rt \right.\\&& \left.+ 2520r - 3575s^3t^3 + 8437s^3t^2 - 5915s^3t + 1365s^3 + 8437s^2t^3 - 19799s^2t^2 + 14105s^2t -\right.\\&& \left. 3315s^2 - 5915st^3 + 14105st^2 - 10390st + 2520s + 1365t^3 - 3315t^2 + 2520t - 630)\right.,\\      
            B^{[1]}_{54}&=&\frac{-h^3r^7}{27720(r - 1)^3(s - 1)^3(t - 1)^3}\left.     (7r^6st - 14r^6s - 14r^6t + 21r^6 - 24r^5s^2t + 48r^5s^2 - 24r^5st^2\right.\\&& \left. + 64r^5st - 21r^5s + 48r^5t^2 - 21r^5t - 70r^5 + 22r^4s^3t - 44r^4s^3 + 88r^4s^2t^2 - 106r^4s^2t - 116\right.\\&& \left.r^4s^2 + 22r^4st^3 - 106r^4st^2 - 70r^4st + 208r^4s - 44r^4t^3 - 116r^4t^2 + 208r^4t + 54r^4 - 88r^3s^3\right.\\&& \left.t^2 + 66r^3s^3t + 176r^3s^3 - 88r^3s^2t^3 - 88r^3s^2t^2 + 506r^3s^2t - 88r^3s^2 + 66r^3st^3 + 506r^3st^2 - \right.\\&& \left.660r^3st - 198r^3s + 176r^3t^3 - 88r^3t^2 - 198r^3t + 99r^2s^3t^3 + 275r^2s^3t^2 - 649r^2s^3t - 154r^2\right.\\&& \left.s^3 + 275r^2s^2t^3 - 781r^2s^2t^2 + 275r^2s^2t + 198r^2s^2 - 649r^2st^3 + 275r^2st^2 + 792r^2st - 154r^2\right.\\&& \left.t^3 + 198r^2t^2 - 594rs^3t^3 + 462rs^3t^2 + 693rs^3t + 462rs^2t^3 + 66rs^2t^2 - 891rs^2t + 693rst^3 -\right.\\&& \left. 891rst^2 + 660s^3t^3 - 924s^3t^2 - 924s^2t^3 + 1188s^2t^2) \right.,\\                                                             
            B^{[1]}_{64}&=&\frac{-h^3s^7}{27720(r - 1)^3(s - 1)^3(t - 1)^3}\left.   (22r^3s^4t - 44r^3s^4 - 88r^3s^3t^2 + 66r^3s^3t + 176r^3s^3 + 99r^3s^2t^3\right.\\&& \left. + 275r^3s^2t^2 - 649r^3s^2t - 154r^3s^2 - 594r^3st^3 + 462r^3st^2 + 693r^3st + 660r^3t^3 - 924r^3t^2 - 24\right.\\&& \left.r^2s^5t + 48r^2s^5 + 88r^2s^4t^2 - 106r^2s^4t - 116r^2s^4 - 88r^2s^3t^3 - 88r^2s^3t^2 + 506r^2s^3t - 88r^2s^3 +\right.\\&& \left. 275r^2s^2t^3 - 781r^2s^2t^2 + 275r^2s^2t + 198r^2s^2 + 462r^2st^3 + 66r^2st^2 - 891r^2st - 924r^2t^3 + 1188\right.\\&& \left.r^2t^2 + 7rs^6t - 14rs^6 - 24rs^5t^2 + 64rs^5t - 21rs^5 + 22rs^4t^3 - 106rs^4t^2 - 70rs^4t + 208rs^4 + 66\right.\\&& \left.rs^3t^3 + 506rs^3t^2 - 660rs^3t - 198rs^3 - 649rs^2t^3 + 275rs^2t^2 + 792rs^2t + 693rst^3 - 891rst^2 - \right.\\&& \left.14s^6t + 21s^6 + 48s^5t^2 - 21s^5t - 70s^5 - 44s^4t^3 - 116s^4t^2 + 208s^4t + 54s^4 + 176s^3t^3 - 88s^3t^2 -\right.\\&& \left. 198s^3t - 154s^2t^3 + 198s^2t^2)\right.,\\                                                                
            B^{[1]}_{74}&=&\frac{-h^3t^7}{27720(r - 1)^3(s - 1)^3(t - 1)^3}\left.    (99r^3s^3t^2 - 594r^3s^3t + 660r^3s^3 - 88r^3s^2t^3 + 275r^3s^2t^2 + 462r^3\right.\\&& \left.s^2t - 924r^3s^2 + 22r^3st^4 + 66r^3st^3 - 649r^3st^2 + 693r^3st - 44r^3t^4 + 176r^3t^3 - 154r^3t^2 - 88r^2\right.\\&& \left.s^3t^3 + 275r^2s^3t^2 + 462r^2s^3t - 924r^2s^3 + 88r^2s^2t^4 - 88r^2s^2t^3 - 781r^2s^2t^2 + 66r^2s^2t + 1188r^2\right.\\&& \left.s^2 - 24r^2st^5 - 106r^2st^4 + 506r^2st^3 + 275r^2st^2 - 891r^2st + 48r^2t^5 - 116r^2t^4 - 88r^2t^3 + 198r^2\right.\\&& \left.t^2 + 22rs^3t^4 + 66rs^3t^3 - 649rs^3t^2 + 693rs^3t - 24rs^2t^5 - 106rs^2t^4 + 506rs^2t^3 + 275rs^2t^2 - 891\right.\\
        \end{eqnarray*}
        \begin{eqnarray*}
            && \left.rs^2t + 7rst^6 + 64rst^5 - 70rst^4 - 660rst^3 + 792rst^2 - 14rt^6 - 21rt^5 + 208rt^4 - 198rt^3 - 44s^3\right.\\&& \left.t^4 + 176s^3t^3 - 154s^3t^2 + 48s^2t^5 - 116s^2t^4 - 88s^2t^3 + 198s^2t^2 - 14st^6 - 21st^5 + 208st^4 - 198s\right.\\&& \left.t^3 + 21t^6 - 70t^5 + 54t^4)\right.,\\                                                               
            B^{[1]}_{84}&=&\frac{h^3}{27720(r - 1)^3(s - 1)^3(t - 1)^3}\left.(924r^3s^3t^3 - 2244r^3s^3t^2 + 1485r^3s^3t - 330r^3s^3 - 2244r^3s^2t^3 + \right.\\&& \left.5280r^3s^2t^2 - 3575r^3s^2t + 814r^3s^2 + 1485r^3st^3 - 3575r^3st^2 + 2574r^3st - 616r^3s - 330r^3t^3 +\right.\\&& \left. 814r^3t^2 - 616r^3t + 154r^3 - 2244r^2s^3t^3 + 5280r^2s^3t^2 - 3575r^2s^3t + 814r^2s^3 + 5280r^2s^2t^3 -\right.\\&& \left. 12320r^2s^2t^2 + 8569r^2s^2t - 2002r^2s^2 - 3575r^2st^3 + 8569r^2st^2 - 6290r^2st + 1536r^2s + 814r^2t^3 \right.\\
            && \left.- 2002r^2t^2 + 1536r^2t - 390r^2 + 1485rs^3t^3 - 3575rs^3t^2 + 2574rs^3t - 616rs^3 - 3575rs^2t^3 + \right.\\&& \left.8569rs^2t^2 - 6290rs^2t + 1536rs^2 + 2574rst^3 - 6290rst^2 + 4793rst - 1210rs - 616rt^3 + 1536\right.\\&& \left.rt^2 - 1210rt + 315r - 330s^3t^3 + 814s^3t^2 - 616s^3t + 154s^3 + 814s^2t^3 - 2002s^2t^2 + 1536s^2t - \right.\\&& \left.390s^2 - 616st^3 + 1536st^2 - 1210st + 315s + 154t^3 - 390t^2 + 315t - 84)\right.,\\                                                       
            B^{[1]}_{94}&=&\frac{-h^2r^6}{27720(r - 1)^3(s - 1)^3(t - 1)^3}\left.     (42r^6st - 84r^6s - 84r^6t + 126r^6 - 132r^5s^2t + 264r^5s^2 - 132r^5\right.\\&& \left.st^2 + 345r^5st - 105r^5s + 264r^5t^2 - 105r^5t - 399r^5 + 110r^4s^3t - 220r^4s^3 + 440r^4s^2t^2 - 506\right.\\&& \left.r^4s^2t - 616r^4s^2 + 110r^4st^3 - 506r^4st^2 - 407r^4st + 1067r^4s - 220r^4t^3 - 616r^4t^2 + 1067r^4t +\right.\\&& \left. 297r^4 - 396r^3s^3t^2 + 275r^3s^3t + 825r^3s^3 - 396r^3s^2t^3 - 484r^3s^2t^2 + 2387r^3s^2t - 363r^3s^2 + \right.\\&& \left.275r^3st^3 + 2387r^3st^2 - 2992r^3st - 990r^3s + 825r^3t^3 - 363r^3t^2 - 990r^3t + 396r^2s^3t^3 + 1188\right.\\&& \left.r^2s^3t^2 - 2673r^2s^3t - 693r^2s^3 + 1188r^2s^2t^3 - 3168r^2s^2t^2 + 891r^2s^2t + 891r^2s^2 - 2673r^2st^3 +\right.\\&& \left. 891r^2st^2 + 3564r^2st - 693r^2t^3 + 891r^2t^2 - 2178rs^3t^3 + 1518rs^3t^2 + 2772rs^3t + 1518rs^2t^3 + \right.\\&& \left.726rs^2t^2 - 3564rs^2t + 2772rst^3 - 3564rst^2 + 2310s^3t^3 - 3234s^3t^2 - 3234s^2t^3 + 4158s^2t^2)\right.,\\               
            B^{[1]}_{104}&=&\frac{-h^2s^6}{27720(r - 1)^3(s - 1)^3(t - 1)^3}\left.     (110r^3s^4t - 220r^3s^4 - 396r^3s^3t^2 + 275r^3s^3t + 825r^3s^3 + 396r^3\right.\\&& \left.s^2t^3 + 1188r^3s^2t^2 - 2673r^3s^2t - 693r^3s^2 - 2178r^3st^3 + 1518r^3st^2 + 2772r^3st + 2310r^3t^3 -\right.\\&& \left. 3234r^3t^2 - 132r^2s^5t + 264r^2s^5 + 440r^2s^4t^2 - 506r^2s^4t - 616r^2s^4 - 396r^2s^3t^3 - 484r^2s^3t^2 + \right.\\&& \left.2387r^2s^3t - 363r^2s^3 + 1188r^2s^2t^3 - 3168r^2s^2t^2 + 891r^2s^2t + 891r^2s^2 + 1518r^2st^3 + 726r^2s\right.\\&& \left.t^2 - 3564r^2st - 3234r^2t^3 + 4158r^2t^2 + 42rs^6t - 84rs^6 - 132rs^5t^2 + 345rs^5t - 105rs^5 + 110\right.\\&& \left.rs^4t^3 - 506rs^4t^2 - 407rs^4t + 1067rs^4 + 275rs^3t^3 + 2387rs^3t^2 - 2992rs^3t - 990rs^3 - 2673r\right.\\&& \left.s^2t^3 + 891rs^2t^2 + 3564rs^2t + 2772rst^3 - 3564rst^2 - 84s^6t + 126s^6 + 264s^5t^2 - 105s^5t - 399\right.\\&& \left.s^5 - 220s^4t^3 - 616s^4t^2 + 1067s^4t + 297s^4 + 825s^3t^3 - 363s^3t^2 - 990s^3t - 693s^2t^3 + 891s^2t^2)\right.,\\              
            B^{[1]}_{114}&=&\frac{-h^2t^6}{27720(r - 1)^3(s - 1)^3(t - 1)^3}\left.     (396r^3s^3t^2 - 2178r^3s^3t + 2310r^3s^3 - 396r^3s^2t^3 + 1188r^3s^2t^2 \right.\\&& \left.+ 1518r^3s^2t - 3234r^3s^2 + 110r^3st^4 + 275r^3st^3 - 2673r^3st^2 + 2772r^3st - 220r^3t^4 + 825r^3t^3\right.\\&& \left. - 693r^3t^2 - 396r^2s^3t^3 + 1188r^2s^3t^2 + 1518r^2s^3t - 3234r^2s^3 + 440r^2s^2t^4 - 484r^2s^2t^3 - 3168\right.\\&& \left.r^2s^2t^2 + 726r^2s^2t + 4158r^2s^2 - 132r^2st^5 - 506r^2st^4 + 2387r^2st^3 + 891r^2st^2 - 3564r^2st + \right.\\&& \left.264r^2t^5 - 616r^2t^4 - 363r^2t^3 + 891r^2t^2 + 110rs^3t^4 + 275rs^3t^3 - 2673rs^3t^2 + 2772rs^3t - 132\right.\\&& \left.rs^2t^5 - 506rs^2t^4 + 2387rs^2t^3 + 891rs^2t^2 - 3564rs^2t + 42rst^6 + 345rst^5 - 407rst^4 - 2992rs\right.\\&& \left.t^3 + 3564rst^2 - 84rt^6 - 105rt^5 + 1067rt^4 - 990rt^3 - 220s^3t^4 + 825s^3t^3 - 693s^3t^2 + 264s^2t^5\right.\\&& \left. - 616s^2t^4 - 363s^2t^3 + 891s^2t^2 - 84st^6 - 105st^5 + 1067st^4 - 990st^3 + 126t^6 - 399t^5 + 297t^4)\right.,\\              
            B^{[1]}_{124}&=&\frac{h^2}{27720(r - 1)^3(s - 1)^3(t - 1)^3}\left.   (4158r^3s^3t^3 - 10626r^3s^3t^2 + 7920r^3s^3t - 1980r^3s^3 - 10626r^3\right.\\&& \left.s^2t^3 + 26598r^3s^2t^2 - 20196r^3s^2t + 5148r^3s^2 + 7920r^3st^3 - 20196r^3st^2 + 16027r^3st - 4235\right.\\&& \left.r^3s - 1980r^3t^3 + 5148r^3t^2 - 4235r^3t + 1155r^3 - 10626r^2s^3t^3 + 26598r^2s^3t^2 - 20196r^2s^3t +\right.\\&& \left. 5148r^2s^3 + 26598r^2s^2t^3 - 66330r^2s^2t^2 + 51436r^2s^2t - 13376r^2s^2 - 20196r^2st^3 + 51436r^2st^2\right.\\&& \left. - 41437r^2st + 11121r^2s + 5148r^2t^3 - 13376r^2t^2 + 11121r^2t - 3069r^2 + 7920rs^3t^3 - 20196r\right.\\
            && \left.s^3t^2 + 16027rs^3t - 4235rs^3 - 20196rs^2t^3 + 51436rs^2t^2 - 41437rs^2t + 11121rs^2 + 16027rst^3\right.\\
        \end{eqnarray*}
        \begin{eqnarray*}
            && \left. - 41437rst^2 + 34278rst - 9420rs - 4235rt^3 + 11121rt^2 - 9420rt + 2646r - 1980s^3t^3 + 5148\right.\\&& \left.s^3t^2 - 4235s^3t + 1155s^3 + 5148s^2t^3 - 13376s^2t^2 + 11121s^2t - 3069s^2 - 4235st^3 + 11121st^2 \right.\\&& \left.- 9420st + 2646s + 1155t^3 - 3069t^2 + 2646t - 756)\right.,\\
            B^{[1]}_{134}&=&\frac{-hr^5}{1260(r - 1)^3(s - 1)^3(t - 1)^3}\left.        (7r^6st - 14r^6s - 14r^6t + 21r^6 - 20r^5s^2t + 40r^5s^2 - 20r^5st^2 +\right.\\&& \left. 51r^5st - 14r^5s + 40r^5t^2 - 14r^5t - 63r^5 + 15r^4s^3t - 30r^4s^3 + 60r^4s^2t^2 - 65r^4s^2t - 90r^4s^2\right.\\&& \left. + 15r^4st^3 - 65r^4st^2 - 65r^4st + 150r^4s - 30r^4t^3 - 90r^4t^2 + 150r^4t + 45r^4 - 48r^3s^3t^2 + 30r^3\right.\\&& \left.s^3t + 105r^3s^3 - 48r^3s^2t^3 - 72r^3s^2t^2 + 306r^3s^2t - 39r^3s^2 + 30r^3st^3 + 306r^3st^2 - 366r^3st - \right.\\&& \left.135r^3s + 105r^3t^3 - 39r^3t^2 - 135r^3t + 42r^2s^3t^3 + 138r^2s^3t^2 - 294r^2s^3t - 84r^2s^3 + 138r^2s^2\right.\\&& \left.t^3 - 342r^2s^2t^2 + 66r^2s^2t + 108r^2s^2 - 294r^2st^3 + 66r^2st^2 + 432r^2st - 84r^2t^3 + 108r^2t^2 - \right.\\&& \left.210rs^3t^3 + 126rs^3t^2 + 294rs^3t + 126rs^2t^3 + 126rs^2t^2 - 378rs^2t + 294rst^3 - 378rst^2 + 210\right.\\&& \left.s^3t^3 - 294s^3t^2 - 294s^2t^3 + 378s^2t^2) \right.,\\ B^{[1]}_{144}&=&\frac{-hs^5}{1260(r - 1)^3(s - 1)^3(t - 1)^3}\left.(15r^3s^4t - 30r^3s^4 - 48r^3s^3t^2 + 30r^3s^3t + 105r^3s^3 + 42r^3s^2t^3 +\right.\\&& \left. 138r^3s^2t^2 - 294r^3s^2t - 84r^3s^2 - 210r^3st^3 + 126r^3st^2 + 294r^3st + 210r^3t^3 - 294r^3t^2 - 20r^2\right.\\&& \left.s^5t + 40r^2s^5 + 60r^2s^4t^2 - 65r^2s^4t - 90r^2s^4 - 48r^2s^3t^3 - 72r^2s^3t^2 + 306r^2s^3t - 39r^2s^3 + 138\right.\\&& \left.r^2s^2t^3 - 342r^2s^2t^2 + 66r^2s^2t + 108r^2s^2 + 126r^2st^3 + 126r^2st^2 - 378r^2st - 294r^2t^3 + 378r^2t^2\right.\\&& \left. + 7rs^6t - 14rs^6 - 20rs^5t^2 + 51rs^5t - 14rs^5 + 15rs^4t^3 - 65rs^4t^2 - 65rs^4t + 150rs^4 + 30rs^3t^3\right.\\&& \left. + 306rs^3t^2 - 366rs^3t - 135rs^3 - 294rs^2t^3 + 66rs^2t^2 + 432rs^2t + 294rst^3 - 378rst^2 - 14s^6t +\right.\\&& \left. 21s^6 + 40s^5t^2 - 14s^5t - 63s^5 - 30s^4t^3 - 90s^4t^2 + 150s^4t + 45s^4 + 105s^3t^3 - 39s^3t^2 - 135s^3t\right.\\&& \left. - 84s^2t^3 + 108s^2t^2)\right.,\\                                                                         
            B^{[1]}_{154}&=&\frac{-ht^5}{1260(r - 1)^3(s - 1)^3(t - 1)^3}\left.    (42r^3s^3t^2 - 210r^3s^3t + 210r^3s^3 - 48r^3s^2t^3 + 138r^3s^2t^2 + 126r^3\right.\\&& \left.s^2t - 294r^3s^2 + 15r^3st^4 + 30r^3st^3 - 294r^3st^2 + 294r^3st - 30r^3t^4 + 105r^3t^3 - 84r^3t^2 - 48r^2\right.\\&& \left.s^3t^3 + 138r^2s^3t^2 + 126r^2s^3t - 294r^2s^3 + 60r^2s^2t^4 - 72r^2s^2t^3 - 342r^2s^2t^2 + 126r^2s^2t + 378r^2\right.\\&& \left.s^2 - 20r^2st^5 - 65r^2st^4 + 306r^2st^3 + 66r^2st^2 - 378r^2st + 40r^2t^5 - 90r^2t^4 - 39r^2t^3 + 108r^2t^2 \right.\\&& \left.+ 15rs^3t^4 + 30rs^3t^3 - 294rs^3t^2 + 294rs^3t - 20rs^2t^5 - 65rs^2t^4 + 306rs^2t^3 + 66rs^2t^2 - 378rs^2\right.\\&& \left.t + 7rst^6 + 51rst^5 - 65rst^4 - 366rst^3 + 432rst^2 - 14rt^6 - 14rt^5 + 150rt^4 - 135rt^3 - 30s^3t^4\right.\\&& \left. + 105s^3t^3 - 84s^3t^2 + 40s^2t^5 - 90s^2t^4 - 39s^2t^3 + 108s^2t^2 - 14st^6 - 14st^5 + 150st^4 - 135st^3 +\right.\\&& \left. 21t^6 - 63t^5 + 45t^4) \right.,\\                                                                        
            B^{[1]}_{164}&=&\frac{h}{1260(r - 1)^3(s - 1)^3(t - 1)^3}\left.     (630r^3s^3t^3 - 1722r^3s^3t^2 + 1470r^3s^3t - 420r^3s^3 - 1722r^3s^2t^3 + \right.\\&& \left.4662r^3s^2t^2 - 4026r^3s^2t + 1164r^3s^2 + 1470r^3st^3 - 4026r^3st^2 + 3561r^3st - 1050r^3s - 420r^3t^3\right.\\&& \left. + 1164r^3t^2 - 1050r^3t + 315r^3 - 1722r^2s^3t^3 + 4662r^2s^3t^2 - 4026r^2s^3t + 1164r^2s^3 + 4662r^2s^2\right.\\&& \left.t^3 - 12618r^2s^2t^2 + 11034r^2s^2t - 3228r^2s^2 - 4026r^2st^3 + 11034r^2st^2 - 9847r^2st + 2930r^2s +\right.\\&& \left. 1164r^2t^3 - 3228r^2t^2 + 2930r^2t - 885r^2 + 1470rs^3t^3 - 4026rs^3t^2 + 3561rs^3t - 1050rs^3 - 4026\right.\\&& \left.rs^2t^3 + 11034rs^2t^2 - 9847rs^2t + 2930rs^2 + 3561rst^3 - 9847rst^2 + 8913rst - 2686rs - 1050r\right.\\&& \left.t^3 + 2930rt^2 - 2686rt + 819r - 420s^3t^3 + 1164s^3t^2 - 1050s^3t + 315s^3 + 1164s^2t^3 - 3228s^2t^2\right.\\&& \left. + 2930s^2t - 885s^2 - 1050st^3 + 2930st^2 - 2686st + 819s + 315t^3 - 885t^2 + 819t - 252)\right..\\
            D^{[0]}_{116}&=&\frac{h^5r^5}{2162160s^2t^2}\left.(35r^6 - 130r^5s - 130r^5t - 130r^5 + 130r^4s^2 + 520r^4st + 520r^4s + 130r^4t^2 + 520\right.\\&& \left.r^4t + 130r^4 - 572r^3s^2t - 572r^3s^2 - 572r^3st^2 - 2288r^3st - 572r^3s - 572r^3t^2 - 572r^3t + 715\right.\\&& \left.r^2s^2t^2 + 2860r^2s^2t + 715r^2s^2 + 2860r^2st^2 + 2860r^2st + 715r^2t^2 - 4290rs^2t^2 - 4290rs^2t -\right.\\&& \left. 4290rst^2 + 8580s^2t^2)\right.,\\
            D^{[0]}_{216}&=&\frac{h^5s^5}{2162160r^2t^2}\left.(130r^2s^4 - 572r^2s^3t - 572r^2s^3 + 715r^2s^2t^2 + 2860r^2s^2t + 715r^2s^2 - 4290r^2st^2\right.\\
        \end{eqnarray*}
        \begin{eqnarray*}
            && \left. - 4290r^2st + 8580r^2t^2 - 130rs^5 + 520rs^4t + 520rs^4 - 572rs^3t^2 - 2288rs^3t - 572rs^3 + 2860\right.\\&& \left.rs^2t^2 + 2860rs^2t - 4290rst^2 + 35s^6 - 130s^5t - 130s^5 + 130s^4t^2 + 520s^4t + 130s^4 - 572s^3t^2\right.\\&& \left. - 572s^3t + 715s^2t^2)\right.,\\
            D^{[0]}_{316}&=&\frac{h^5t^5}{2162160r^2s^2}\left.(715r^2s^2t^2 - 4290r^2s^2t + 8580r^2s^2 - 572r^2st^3 + 2860r^2st^2 - 4290r^2st + 130r^2\right.\\
            && \left.t^4 - 572r^2t^3 + 715r^2t^2 - 572rs^2t^3 + 2860rs^2t^2 - 4290rs^2t + 520rst^4 - 2288rst^3 + 2860rst^2\right.\\&& \left. - 130rt^5 + 520rt^4 - 572rt^3 + 130s^2t^4 - 572s^2t^3 + 715s^2t^2 - 130st^5 + 520st^4 - 572st^3 + 35t^6 \right.\\&& \left.- 130t^5 + 130t^4)\right.,\\
            D^{[0]}_{416}&=&\frac{h^5}{2162160r^2s^2t^2}\left.(8580r^2s^2t^2 - 4290r^2s^2t + 715r^2s^2 - 4290r^2st^2 + 2860r^2st - 572r^2s + 715r^2\right.\\&& \left.t^2 - 572r^2t + 130r^2 - 4290rs^2t^2 + 2860rs^2t - 572rs^2 + 2860rst^2 - 2288rst + 520rs - 572rt^2\right.\\&& \left. + 520rt - 130r + 715s^2t^2 - 572s^2t + 130s^2 - 572st^2 + 520st - 130s + 130t^2 - 130t + 35)\right.,\\
            D^{[0]}_{516}&=&\frac{h^4r^4}{55440s^2t^2}\left.(7r^6 - 24r^5s - 24r^5t - 24r^5 + 22r^4s^2 + 88r^4st + 88r^4s + 22r^4t^2 + 88r^4t + 22r^4 -\right.\\&& \left. 88r^3s^2t - 88r^3s^2 - 88r^3st^2 - 352r^3st - 88r^3s - 88r^3t^2 - 88r^3t + 99r^2s^2t^2 + 396r^2s^2t + 99r^2\right.\\&& \left.s^2 + 396r^2st^2 + 396r^2st + 99r^2t^2 - 528rs^2t^2 - 528rs^2t - 528rst^2 + 924s^2t^2)\right.,\\
            D^{[0]}_{616}&=&\frac{h^4s^4}{55440r^2t^2}\left.(22r^2s^4 - 88r^2s^3t - 88r^2s^3 + 99r^2s^2t^2 + 396r^2s^2t + 99r^2s^2 - 528r^2st^2 - 528r^2st\right.\\&& \left. + 924r^2t^2 - 24rs^5 + 88rs^4t + 88rs^4 - 88rs^3t^2 - 352rs^3t - 88rs^3 + 396rs^2t^2 + 396rs^2t - 528\right.\\&& \left.rst^2 + 7s^6 - 24s^5t - 24s^5 + 22s^4t^2 + 88s^4t + 22s^4 - 88s^3t^2 - 88s^3t + 99s^2t^2)\right.,\\
            D^{[0]}_{716}&=&\frac{h^4t^4}{55440r^2s^2}\left.(99r^2s^2t^2 - 528r^2s^2t + 924r^2s^2 - 88r^2st^3 + 396r^2st^2 - 528r^2st + 22r^2t^4 - 88r^2t^3\right.\\&& \left. + 99r^2t^2 - 88rs^2t^3 + 396rs^2t^2 - 528rs^2t + 88rst^4 - 352rst^3 + 396rst^2 - 24rt^5 + 88rt^4 - 88r\right.\\&& \left.t^3 + 22s^2t^4 - 88s^2t^3 + 99s^2t^2 - 24st^5 + 88st^4 - 88st^3 + 7t^6 - 24t^5 + 22t^4)\right.,\\
            D^{[0]}_{816}&=&\frac{h^4}{55440r^2s^2t^2}\left.(924r^2s^2t^2 - 528r^2s^2t + 99r^2s^2 - 528r^2st^2 + 396r^2st - 88r^2s + 99r^2t^2 - 88r^2t\right.\\&& \left. + 22r^2 - 528rs^2t^2 + 396rs^2t - 88rs^2 + 396rst^2 - 352rst + 88rs - 88rt^2 + 88rt - 24r + 99s^2\right.\\&& \left.t^2 - 88s^2t + 22s^2 - 88st^2 + 88st - 24s + 22t^2 - 24t + 7)\right.,\\
            D^{[0]}_{916}&=&\frac{h^3r^3}{27720s^2t^2}\left.(21r^6 - 66r^5s - 66r^5t - 66r^5 + 55r^4s^2 + 220r^4st + 220r^4s + 55r^4t^2 + 220r^4t + 55\right.\\&& \left.r^4 - 198r^3s^2t - 198r^3s^2 - 198r^3st^2 - 792r^3st - 198r^3s - 198r^3t^2 - 198r^3t + 198r^2s^2t^2 + 792\right.\\&& \left.r^2s^2t + 198r^2s^2 + 792r^2st^2 + 792r^2st + 198r^2t^2 - 924rs^2t^2 - 924rs^2t - 924rst^2 + 1386s^2t^2)\right.,\\
            D^{[0]}_{1016}&=&\frac{h^3s^3}{27720r^2t^2}\left.(55r^2s^4 - 198r^2s^3t - 198r^2s^3 + 198r^2s^2t^2 + 792r^2s^2t + 198r^2s^2 - 924r^2st^2 - 924r^2\right.\\&& \left.st + 1386r^2t^2 - 66rs^5 + 220rs^4t + 220rs^4 - 198rs^3t^2 - 792rs^3t - 198rs^3 + 792rs^2t^2 + 792rs^2\right.\\&& \left.t - 924rst^2 + 21s^6 - 66s^5t - 66s^5 + 55s^4t^2 + 220s^4t + 55s^4 - 198s^3t^2 - 198s^3t + 198s^2t^2)\right.,\\
            D^{[0]}_{1116}&=&\frac{h^3t^3}{27720r^2s^2}\left.(198r^2s^2t^2 - 924r^2s^2t + 1386r^2s^2 - 198r^2st^3 + 792r^2st^2 - 924r^2st + 55r^2t^4 - 198\right.\\&& \left.r^2t^3 + 198r^2t^2 - 198rs^2t^3 + 792rs^2t^2 - 924rs^2t + 220rst^4 - 792rst^3 + 792rst^2 - 66rt^5 + 220\right.\\&& \left.rt^4 - 198rt^3 + 55s^2t^4 - 198s^2t^3 + 198s^2t^2 - 66st^5 + 220st^4 - 198st^3 + 21t^6 - 66t^5 + 55t^4)\right.,\\
            D^{[0]}_{1216}&=&\frac{h^3}{27720r^2s^2t^2}\left.(1386r^2s^2t^2 - 924r^2s^2t + 198r^2s^2 - 924r^2st^2 + 792r^2st - 198r^2s + 198r^2t^2 - 198\right.\\&& \left.r^2t + 55r^2 - 924rs^2t^2 + 792rs^2t - 198rs^2 + 792rst^2 - 792rst + 220rs - 198rt^2 + 220rt - 66r\right.\\&& \left. + 198s^2t^2 - 198s^2t + 55s^2 - 198st^2 + 220st - 66s + 55t^2 - 66t + 21)\right.,\\
            D^{[0]}_{1316}&=&\frac{h^2r^2}{2520s^2t^2}\left.(7r^6 - 20r^5s - 20r^5t - 20r^5 + 15r^4s^2 + 60r^4st + 60r^4s + 15r^4t^2 + 60r^4t + 15r^4 - 48\right.\\&& \left.r^3s^2t - 48r^3s^2 - 48r^3st^2 - 192r^3st - 48r^3s - 48r^3t^2 - 48r^3t + 42r^2s^2t^2 + 168r^2s^2t + 42r^2s^2 +\right.\\&& \left. 168r^2st^2 + 168r^2st + 42r^2t^2 - 168rs^2t^2 - 168rs^2t - 168rst^2 + 210s^2t^2)\right.,\\
        \end{eqnarray*}
        \begin{eqnarray*}
            D^{[0]}_{1416}&=&\frac{h^2s^2}{2520r^2t^2}\left.(15r^2s^4 - 48r^2s^3t - 48r^2s^3 + 42r^2s^2t^2 + 168r^2s^2t + 42r^2s^2 - 168r^2st^2 - 168r^2st +\right.\\&& \left. 210r^2t^2 - 20rs^5 + 60rs^4t + 60rs^4 - 48rs^3t^2 - 192rs^3t - 48rs^3 + 168rs^2t^2 + 168rs^2t - 168rst^2\right.\\&& \left. + 7s^6 - 20s^5t - 20s^5 + 15s^4t^2 + 60s^4t + 15s^4 - 48s^3t^2 - 48s^3t + 42s^2t^2)\right.,\\
            D^{[0]}_{1516}&=&\frac{h^2t^2}{2520r^2s^2}\left.(42r^2s^2t^2 - 168r^2s^2t + 210r^2s^2 - 48r^2st^3 + 168r^2st^2 - 168r^2st + 15r^2t^4 - 48r^2t^3 + \right.\\&& \left.42r^2t^2 - 48rs^2t^3 + 168rs^2t^2 - 168rs^2t + 60rst^4 - 192rst^3 + 168rst^2 - 20rt^5 + 60rt^4 - 48rt^3 \right.\\&& \left.+ 15s^2t^4 - 48s^2t^3 + 42s^2t^2 - 20st^5 + 60st^4 - 48st^3 + 7t^6 - 20t^5 + 15t^4)\right.,\\
            D^{[0]}_{1616}&=&\frac{h^2}{2520r^2s^2t^2}\left.(210r^2s^2t^2 - 168r^2s^2t + 42r^2s^2 - 168r^2st^2 + 168r^2st - 48r^2s + 42r^2t^2 - 48r^2t + \right.\\&& \left.15r^2 - 168rs^2t^2 + 168rs^2t - 48rs^2 + 168rst^2 - 192rst + 60rs - 48rt^2 + 60rt - 20r + 42s^2t^2\right.\\&& \left. - 48s^2t + 15s^2 - 48st^2 + 60st - 20s + 15t^2 - 20t + 7)\right..\\ 
            D^{[1]}_{11}&=&\frac{-h^5r^5}{1081080(r - s)^2(r - t)^2(r - 1)^2}\left.(28r^6 - 91r^5s - 91r^5t - 91r^5 + 78r^4s^2 + 312r^4st + 312r^4s\right.\\&& \left. + 78r^4t^2 + 312r^4t + 78r^4 - 286r^3s^2t - 286r^3s^2 - 286r^3st^2 - 1144r^3st - 286r^3s - 286r^3t^2 -\right.\\&& \left. 286r^3t + 286r^2s^2t^2 + 1144r^2s^2t + 286r^2s^2 + 1144r^2st^2 + 1144r^2st + 286r^2t^2 - 1287rs^2t^2 - \right.\\&& \left.1287rs^2t - 1287rst^2 + 1716s^2t^2)\right.,\\
            D^{[1]}_{21}&=&\frac{-h^5s^8}{2162160r^2(r - s)^2(r - t)^2(r - 1)^2}\left.(572s^2t^2 - 130s^3t^2 + 286rs^2 - 260rs^3 + 65rs^4 + 2145rt^2\right.\\&& \left. - 715st^2 + 572s^2t - 520s^3t + 130s^4t - 130s^3 + 130s^4 - 35s^5 - 1430rst^2 + 1144rs^2t - 260r\right.\\      
            && \left.s^3t + 286rs^2t^2 - 1430rst)\right.,\\
            D^{[1]}_{31}&=&\frac{-h^5t^8}{2162160r^2(r - s)^2(r - t)^2(r - 1)^2}\left.(572s^2t^2 - 130s^2t^3 + 2145rs^2 + 286rt^2 - 260rt^3 + 65rt^4 + \right.\\&& \left.572st^2 - 715s^2t - 520st^3 + 130st^4 - 130t^3 + 130t^4 - 35t^5 + 1144rst^2 - 1430rs^2t - 260rst^3 +\right.\\&& \left. 286rs^2t^2 - 1430rst)\right.,\\
            D^{[1]}_{41}&=&\frac{-h^5}{2162160r^2(r - s)^2(r - t)^2(r - 1)^2}\left. (65r + 130s + 130t - 715s^2t^2 - 260rs - 260rt - 520st + \right.\\&& \left.286rs^2 + 286rt^2 + 572st^2 + 572s^2t - 130s^2 - 130t^2 - 1430rst^2 - 1430rs^2t + 2145rs^2t^2 +\right.\\&& \left. 1144rst - 35)\right.,\\
            D^{[1]}_{51}&=&\frac{-h^4r^4}{55440(r - s)^2(r - t)^2(r - 1)^2}\left. (14r^6 - 42r^5s - 42r^5t - 42r^5 + 33r^4s^2 + 132r^4st + 132r^4s + \right.\\&& \left.33r^4t^2 + 132r^4t + 33r^4 - 110r^3s^2t - 110r^3s^2 - 110r^3st^2 - 440r^3st - 110r^3s - 110r^3t^2 - \right.\\&& \left.110r^3t + 99r^2s^2t^2 + 396r^2s^2t + 99r^2s^2 + 396r^2st^2 + 396r^2st + 99r^2t^2 - 396rs^2t^2 - 396rs^2\right.\\&& \left.t - 396rst^2 + 462s^2t^2)\right.,\\
            D^{[1]}_{61}&=&\frac{-h^4s^7}{55440r^2(r - s)^2(r - t)^2(r - 1)^2}\left.(88s^2t^2 - 22s^3t^2 + 44rs^2 - 44rs^3 + 12rs^4 + 264rt^2 - 99st^2\right.\\&& \left. + 88s^2t - 88s^3t + 24s^4t - 22s^3 + 24s^4 - 7s^5 - 198rst^2 + 176rs^2t - 44rs^3t + 44rs^2t^2 - 198rst)\right.,\\
            D^{[1]}_{71}&=&\frac{-h^4t^7}{55440r^2(r - s)^2(r - t)^2(r - 1)^2}\left. (88s^2t^2 - 22s^2t^3 + 264rs^2 + 44rt^2 - 44rt^3 + 12rt^4 + 88st^2 \right.\\&& \left.- 99s^2t - 88st^3 + 24st^4 - 22t^3 + 24t^4 - 7t^5 + 176rst^2 - 198rs^2t - 44rst^3 + 44rs^2t^2 - 198rst)\right.,\\
            D^{[1]}_{81}&=&\frac{ -h^4}{55440r^2(r - s)^2(r - t)^2(r - 1)^2}\left.(12r + 24s + 24t - 99s^2t^2 - 44rs - 44rt - 88st + 44rs^2 + 44\right.\\&& \left.rt^2 + 88st^2 + 88s^2t - 22s^2 - 22t^2 - 198rst^2 - 198rs^2t + 264rs^2t^2 + 176rst - 7)\right.,\\
            D^{[1]}_{91}&=&\frac{-h^3r^3}{13860(r - s)^2(r - t)^2(r - 1)^2}\left.  (28r^6 - 77r^5s - 77r^5t - 77r^5 + 55r^4s^2 + 220r^4st + 220r^4s + 55\right.\\&& \left.r^4t^2 + 220r^4t + 55r^4 - 165r^3s^2t - 165r^3s^2 - 165r^3st^2 - 660r^3st - 165r^3s - 165r^3t^2 - 165r^3\right.\\&& \left.t + 132r^2s^2t^2 + 528r^2s^2t + 132r^2s^2 + 528r^2st^2 + 528r^2st + 132r^2t^2 - 462rs^2t^2 - 462rs^2t -\right.\\&& \left. 462rst^2 + 462s^2t^2)\right.,\\
        \end{eqnarray*}
        \begin{eqnarray*}
            D^{[1]}_{101}&=&\frac{-h^3s^6}{27720r^2(r - s)^2(r - t)^2(r - 1)^2}\left. (198s^2t^2 - 55s^3t^2 + 99rs^2 - 110rs^3 + 33rs^4 + 462rt^2 - 198s\right.\\&& \left.t^2 + 198s^2t - 220s^3t + 66s^4t - 55s^3 + 66s^4 - 21s^5 - 396rst^2 + 396rs^2t - 110rs^3t + 99rs^2t^2\right.\\&& \left. - 396rst)\right.,\\
            D^{[1]}_{111}&=&\frac{-h^3t^6}{27720r^2(r - s)^2(r - t)^2(r - 1)^2}\left. (198s^2t^2 - 55s^2t^3 + 462rs^2 + 99rt^2 - 110rt^3 + 33rt^4 + 198s\right.\\&& \left.t^2 - 198s^2t - 220st^3 + 66st^4 - 55t^3 + 66t^4 - 21t^5 + 396rst^2 - 396rs^2t - 110rst^3 + 99rs^2t^2\right.\\&& \left. - 396rst)\right.,\\
            D^{[1]}_{121}&=&\frac{-h^3}{27720r^2(r - s)^2(r - t)^2(r - 1)^2}\left. (33r + 66s + 66t - 198s^2t^2 - 110rs - 110rt - 220st + 99rs^2\right.\\&& \left. + 99rt^2 + 198st^2 + 198s^2t - 55s^2 - 55t^2 - 396rst^2 - 396rs^2t + 462rs^2t^2 + 396rst - 21)\right.,\\
            D^{[1]}_{131}&=&\frac{-h^2r^2}{2520(r - s)^2(r - t)^2(r - 1)^2}\left. (28r^6 - 70r^5s - 70r^5t - 70r^5 + 45r^4s^2 + 180r^4st + 180r^4s + 45\right.\\&& \left.r^4t^2 + 180r^4t + 45r^4 - 120r^3s^2t - 120r^3s^2 - 120r^3st^2 - 480r^3st - 120r^3s - 120r^3t^2 - 120r^3\right.\\&& \left.t + 84r^2s^2t^2 + 336r^2s^2t + 84r^2s^2 + 336r^2st^2 + 336r^2st + 84r^2t^2 - 252rs^2t^2 - 252rs^2t - 252\right.\\&& \left.rst^2 + 210s^2t^2)\right.,\\
            D^{[1]}_{141}&=&\frac{-h^2s^5}{2520r^2(r - s)^2(r - t)^2(r - 1)^2}\left.  (48s^2t^2 - 15s^3t^2 + 24rs^2 - 30rs^3 + 10rs^4 + 84rt^2 - 42st^2 + 48\right.\\&& \left.s^2t - 60s^3t + 20s^4t - 15s^3 + 20s^4 - 7s^5 - 84rst^2 + 96rs^2t - 30rs^3t + 24rs^2t^2 - 84rst)\right.,\\
            D^{[1]}_{151}&=&\frac{-h^2t^5}{2520r^2(r - s)^2(r - t)^2(r - 1)^2}\left.  (48s^2t^2 - 15s^2t^3 + 84rs^2 + 24rt^2 - 30rt^3 + 10rt^4 + 48st^2 - 42\right.\\&& \left.s^2t - 60st^3 + 20st^4 - 15t^3 + 20t^4 - 7t^5 + 96rst^2 - 84rs^2t - 30rst^3 + 24rs^2t^2 - 84rst)\right.,\\ 
            D^{[1]}_{161}&=&\frac{-h^2}{2520r^2(r - s)^2(r - t)^2(r - 1)^2}\left.  (10r + 20s + 20t - 42s^2t^2 - 30rs - 30rt - 60st + 24rs^2 + 24\right.\\&& \left.rt^2 + 48st^2 + 48s^2t - 15s^2 - 15t^2 - 84rst^2 - 84rs^2t + 84rs^2t^2 + 96rst - 7)\right.,\\
            D^{[1]}_{12}&=&\frac{-h^5r^8}{2162160s^2(r - s)^2(s - t)^2(s - 1)^2}\left.(572r^2t^2 - 130r^3t^2 + 286r^2s - 260r^3s + 65r^4s - 715rt^2 +\right.\\&& \left. 572r^2t - 520r^3t + 130r^4t + 2145st^2 - 130r^3 + 130r^4 - 35r^5 - 1430rst^2 + 1144r^2st - 260r^3\right.\\&& \left.st + 286r^2st^2 - 1430rst)\right.,\\
            D^{[1]}_{22}&=&\frac{-h^5s^5}{1081080(r - s)^2(s - t)^2(s - 1)^2}\left.(78r^2s^4 - 286r^2s^3t - 286r^2s^3 + 286r^2s^2t^2 + 1144r^2s^2t + \right.\\&& \left.286r^2s^2 - 1287r^2st^2 - 1287r^2st + 1716r^2t^2 - 91rs^5 + 312rs^4t + 312rs^4 - 286rs^3t^2 - 1144\right.\\&& \left.rs^3t - 286rs^3 + 1144rs^2t^2 + 1144rs^2t - 1287rst^2 + 28s^6 - 91s^5t - 91s^5 + 78s^4t^2 + 312s^4t\right.\\&& \left. + 78s^4 - 286s^3t^2 - 286s^3t + 286s^2t^2)\right.,\\
            D^{[1]}_{32}&=&\frac{-h^5t^8}{2162160s^2(r - s)^2(s - t)^2(s - 1)^2}\left.(572r^2t^2 - 130r^2t^3 + 2145r^2s + 572rt^2 - 715r^2t - 520r\right.\\&& \left.t^3 + 130rt^4 + 286st^2 - 260st^3 + 65st^4 - 130t^3 + 130t^4 - 35t^5 + 1144rst^2 - 1430r^2st - 260\right.\\&& \left.rst^3 + 286r^2st^2 - 1430rst)\right.,\\
            D^{[1]}_{42}&=&\frac{-h^5}{2162160s^2(r - s)^2(s - t)^2(s - 1)^2}\left.(130r + 65s + 130t - 715r^2t^2 - 260rs - 520rt - 260st + \right.\\&& \left.286r^2s + 572rt^2 + 572r^2t + 286st^2 - 130r^2 - 130t^2 - 1430rst^2 - 1430r^2st + 2145r^2st^2 +\right.\\&& \left. 1144rst - 35)\right.,\\
            D^{[1]}_{52}&=&\frac{-h^4r^7}{55440s^2(r - s)^2(s - t)^2(s - 1)^2}\left.(88r^2t^2 - 22r^3t^2 + 44r^2s - 44r^3s + 12r^4s - 99rt^2 + 88r^2t\right.\\&& \left. - 88r^3t + 24r^4t + 264st^2 - 22r^3 + 24r^4 - 7r^5 - 198rst^2 + 176r^2st - 44r^3st + 44r^2st^2 -\right.\\&& \left. 198rst)\right.,\\
        \end{eqnarray*}
        \begin{eqnarray*}
            D^{[1]}_{62}&=&\frac{-h^4s^4}{55440(r - s)^2(s - t)^2(s - 1)^2}\left.(33r^2s^4 - 110r^2s^3t - 110r^2s^3 + 99r^2s^2t^2 + 396r^2s^2t + 99r^2\right.\\&& \left.s^2 - 396r^2st^2 - 396r^2st + 462r^2t^2 - 42rs^5 + 132rs^4t + 132rs^4 - 110rs^3t^2 - 440rs^3t - 110\right.\\&& \left.rs^3 + 396rs^2t^2 + 396rs^2t - 396rst^2 + 14s^6 - 42s^5t - 42s^5 + 33s^4t^2 + 132s^4t + 33s^4 - 110\right.\\&& \left.s^3t^2 - 110s^3t + 99s^2t^2)\right.,\\
            D^{[1]}_{72}&=&\frac{-h^4t^7}{55440s^2(r - s)^2(s - t)^2(s - 1)^2}\left.(88r^2t^2 - 22r^2t^3 + 264r^2s + 88rt^2 - 99r^2t - 88rt^3 + 24rt^4 +\right.\\&& \left. 44st^2 - 44st^3 + 12st^4 - 22t^3 + 24t^4 - 7t^5 + 176rst^2 - 198r^2st - 44rst^3 + 44r^2st^2 - 198rst)\right.,\\
            D^{[1]}_{82}&=&\frac{-h^4}{55440s^2(r - s)^2(s - t)^2(s - 1)^2}\left.(24r + 12s + 24t - 99r^2t^2 - 44rs - 88rt - 44st + 44r^2s + 88\right.\\&& \left.rt^2 + 88r^2t + 44st^2 - 22r^2 - 22t^2 - 198rst^2 - 198r^2st + 264r^2st^2 + 176rst - 7)\right.,\\
            D^{[1]}_{92}&=&\frac{-h^3r^6}{27720s^2(r - s)^2(s - t)^2(s - 1)^2}\left.(198r^2t^2 - 55r^3t^2 + 99r^2s - 110r^3s + 33r^4s - 198rt^2 + 198\right.\\&& \left.r^2t - 220r^3t + 66r^4t + 462st^2 - 55r^3 + 66r^4 - 21r^5 - 396rst^2 + 396r^2st - 110r^3st + 99r^2s\right.\\&& \left.t^2 - 396rst)\right.,\\
            D^{[1]}_{102}&=&\frac{-h^3s^3}{13860(r - s)^2(s - t)^2(s - 1)^2}\left.(55r^2s^4 - 165r^2s^3t - 165r^2s^3 + 132r^2s^2t^2 + 528r^2s^2t + 132r^2\right.\\&& \left.s^2 - 462r^2st^2 - 462r^2st + 462r^2t^2 - 77rs^5 + 220rs^4t + 220rs^4 - 165rs^3t^2 - 660rs^3t - 165r\right.\\&& \left.s^3 + 528rs^2t^2 + 528rs^2t - 462rst^2 + 28s^6 - 77s^5t - 77s^5 + 55s^4t^2 + 220s^4t + 55s^4 - 165s^3\right.\\&& \left.t^2 - 165s^3t + 132s^2t^2)\right.,\\
            D^{[1]}_{112}&=&\frac{-h^3t^6}{27720s^2(r - s)^2(s - t)^2(s - 1)^2}\left.(198r^2t^2 - 55r^2t^3 + 462r^2s + 198rt^2 - 198r^2t - 220rt^3 + \right.\\&& \left.66rt^4 + 99st^2 - 110st^3 + 33st^4 - 55t^3 + 66t^4 - 21t^5 + 396rst^2 - 396r^2st - 110rst^3 + 99r^2\right.\\&& \left.st^2 - 396rst)\right.,\\
            D^{[1]}_{122}&=&\frac{-h^3}{27720s^2(r - s)^2(s - t)^2(s - 1)^2}\left.(66r + 33s + 66t - 198r^2t^2 - 110rs - 220rt - 110st + 99\right.\\&& \left.r^2s + 198rt^2 + 198r^2t + 99st^2 - 55r^2 - 55t^2 - 396rst^2 - 396r^2st + 462r^2st^2 + 396rst - 21)\right.,\\
            D^{[1]}_{132}&=&\frac{-h^2r^5}{2520s^2(r - s)^2(s - t)^2(s - 1)^2}\left.(48r^2t^2 - 15r^3t^2 + 24r^2s - 30r^3s + 10r^4s - 42rt^2 + 48r^2t - \right.\\&& \left.60r^3t + 20r^4t + 84st^2 - 15r^3 + 20r^4 - 7r^5 - 84rst^2 + 96r^2st - 30r^3st + 24r^2st^2 - 84rst)\right.,\\
            D^{[1]}_{142}&=&\frac{-h^2s^2}{2520(r - s)^2(s - t)^2(s - 1)^2}\left.(45r^2s^4 - 120r^2s^3t - 120r^2s^3 + 84r^2s^2t^2 + 336r^2s^2t + 84r^2s^2 -\right.\\&& \left. 252r^2st^2 - 252r^2st + 210r^2t^2 - 70rs^5 + 180rs^4t + 180rs^4 - 120rs^3t^2 - 480rs^3t - 120rs^3 + \right.\\&& \left.336rs^2t^2 + 336rs^2t - 252rst^2 + 28s^6 - 70s^5t - 70s^5 + 45s^4t^2 + 180s^4t + 45s^4 - 120s^3t^2 -\right.\\&& \left. 120s^3t + 84s^2t^2)\right.,\\
            D^{[1]}_{152}&=&\frac{-h^2t^5}{2520s^2(r - s)^2(s - t)^2(s - 1)^2}\left.(48r^2t^2 - 15r^2t^3 + 84r^2s + 48rt^2 - 42r^2t - 60rt^3 + 20rt^4 + \right.\\&& \left.24st^2 - 30st^3 + 10st^4 - 15t^3 + 20t^4 - 7t^5 + 96rst^2 - 84r^2st - 30rst^3 + 24r^2st^2 - 84rst)\right.,\\
            D^{[1]}_{162}&=&\frac{-h^2}{2520s^2(r - s)^2(s - t)^2(s - 1)^2}\left.(20r + 10s + 20t - 42r^2t^2 - 30rs - 60rt - 30st + 24r^2s +\right.\\&& \left. 48rt^2 + 48r^2t + 24st^2 - 15r^2 - 15t^2 - 84rst^2 - 84r^2st + 84r^2st^2 + 96rst - 7) \right.,\\ 
            D^{[1]}_{13}&=&\frac{-h^5r^8}{2162160t^2(r - t)^2(s - t)^2(t - 1)^2}\left.(572r^2s^2 - 130r^3s^2 - 715rs^2 + 572r^2s - 520r^3s + 130r^4\right.\\&& \left.s + 286r^2t - 260r^3t + 65r^4t + 2145s^2t - 130r^3 + 130r^4 - 35r^5 - 1430rs^2t + 1144r^2st - 260\right.\\&& \left.r^3st + 286r^2s^2t - 1430rst) \right.,\\
        \end{eqnarray*}
        \begin{eqnarray*}
            D^{[1]}_{23}&=&\frac{-h^5s^8}{2162160t^2(r - t)^2(s - t)^2(t - 1)^2}\left.(572r^2s^2 - 130r^2s^3 + 572rs^2 - 715r^2s - 520rs^3 + 130rs^4\right.\\&& \left. + 2145r^2t + 286s^2t - 260s^3t + 65s^4t - 130s^3 + 130s^4 - 35s^5 + 1144rs^2t - 1430r^2st - 260r\right.\\&& \left.s^3t + 286r^2s^2t - 1430rst)\right.,\\
            D^{[1]}_{33}&=&\frac{-h^5t^5}{1081080(r - t)^2(s - t)^2(t - 1)^2}\left. (286r^2s^2t^2 - 1287r^2s^2t + 1716r^2s^2 - 286r^2st^3 + 1144r^2st^2\right.\\&& \left. - 1287r^2st + 78r^2t^4 - 286r^2t^3 + 286r^2t^2 - 286rs^2t^3 + 1144rs^2t^2 - 1287rs^2t + 312rst^4 - \right.\\&& \left.1144rst^3 + 1144rst^2 - 91rt^5 + 312rt^4 - 286rt^3 + 78s^2t^4 - 286s^2t^3 + 286s^2t^2 - 91st^5 + 312\right.\\&& \left.st^4 - 286st^3 + 28t^6 - 91t^5 + 78t^4)\right.,\\
            D^{[1]}_{43}&=&\frac{-h^5}{2162160t^2(r - t)^2(s - t)^2(t - 1)^2}\left.  (130r + 130s + 65t - 715r^2s^2 - 520rs - 260rt - 260st + \right.\\&& \left.572rs^2 + 572r^2s + 286r^2t + 286s^2t - 130r^2 - 130s^2 - 1430rs^2t - 1430r^2st + 2145r^2s^2t + \right.\\&& \left.1144rst - 35)\right.,\\
            D^{[1]}_{53}&=&\frac{-h^4r^7}{55440t^2(r - t)^2(s - t)^2(t - 1)^2}\left.  (88r^2s^2 - 22r^3s^2 - 99rs^2 + 88r^2s - 88r^3s + 24r^4s + 44r^2t\right.\\&& \left. - 44r^3t + 12r^4t + 264s^2t - 22r^3 + 24r^4 - 7r^5 - 198rs^2t + 176r^2st - 44r^3st + 44r^2s^2t -\right.\\&& \left. 198rst)\right.,\\
            D^{[1]}_{63}&=&\frac{-h^4s^7}{55440t^2(r - t)^2(s - t)^2(t - 1)^2}\left. (88r^2s^2 - 22r^2s^3 + 88rs^2 - 99r^2s - 88rs^3 + 24rs^4 + 264r^2\right.\\&& \left.t + 44s^2t - 44s^3t + 12s^4t - 22s^3 + 24s^4 - 7s^5 + 176rs^2t - 198r^2st - 44rs^3t + 44r^2s^2t -\right.\\&& \left. 198rst)\right.,\\
            D^{[1]}_{73}&=&\frac{-h^4t^4}{55440(r - t)^2(s - t)^2(t - 1)^2}\left.  (99r^2s^2t^2 - 396r^2s^2t + 462r^2s^2 - 110r^2st^3 + 396r^2st^2 - 396\right.\\&& \left.r^2st + 33r^2t^4 - 110r^2t^3 + 99r^2t^2 - 110rs^2t^3 + 396rs^2t^2 - 396rs^2t + 132rst^4 - 440rst^3 +\right.\\&& \left. 396rst^2 - 42rt^5 + 132rt^4 - 110rt^3 + 33s^2t^4 - 110s^2t^3 + 99s^2t^2 - 42st^5 + 132st^4 - 110st^3 +\right.\\&& \left. 14t^6 - 42t^5 + 33t^4)\right.,\\
            D^{[1]}_{83}&=&\frac{-h^4}{55440t^2(r - t)^2(s - t)^2(t - 1)^2}\left.  (24r + 24s + 12t - 99r^2s^2 - 88rs - 44rt - 44st + 88rs^2 + \right.\\&& \left.88r^2s + 44r^2t + 44s^2t - 22r^2 - 22s^2 - 198rs^2t - 198r^2st + 264r^2s^2t + 176rst - 7)\right.,\\
            D^{[1]}_{93}&=&\frac{-h^3r^6}{27720t^2(r - t)^2(s - t)^2(t - 1)^2}\left.   (198r^2s^2 - 55r^3s^2 - 198rs^2 + 198r^2s - 220r^3s + 66r^4s +\right.\\&& \left. 99r^2t - 110r^3t + 33r^4t + 462s^2t - 55r^3 + 66r^4 - 21r^5 - 396rs^2t + 396r^2st - 110r^3st +\right.\\&& \left. 99r^2s^2t - 396rst)\right.,\\  
            D^{[1]}_{103}&=&\frac{-h^3s^6}{27720t^2(r - t)^2(s - t)^2(t - 1)^2}\left.  (198r^2s^2 - 55r^2s^3 + 198rs^2 - 198r^2s - 220rs^3 + 66rs^4 + 462\right.\\&& \left.r^2t + 99s^2t - 110s^3t + 33s^4t - 55s^3 + 66s^4 - 21s^5 + 396rs^2t - 396r^2st - 110rs^3t + 99r^2s^2t\right.\\&& \left. - 396rst)\right.,\\
            D^{[1]}_{113}&=&\frac{-h^3t^3}{13860(r - t)^2(s - t)^2(t - 1)^2}\left.  (132r^2s^2t^2 - 462r^2s^2t + 462r^2s^2 - 165r^2st^3 + 528r^2st^2 - 462r^2\right.\\&& \left.st + 55r^2t^4 - 165r^2t^3 + 132r^2t^2 - 165rs^2t^3 + 528rs^2t^2 - 462rs^2t + 220rst^4 - 660rst^3 + 528\right.\\&& \left.rst^2 - 77rt^5 + 220rt^4 - 165rt^3 + 55s^2t^4 - 165s^2t^3 + 132s^2t^2 - 77st^5 + 220st^4 - 165st^3 + 28\right.\\&& \left.t^6 - 77t^5 + 55t^4)\right.,\\
            D^{[1]}_{123}&=&\frac{-h^3}{27720t^2(r - t)^2(s - t)^2(t - 1)^2}\left.  (66r + 66s + 33t - 198r^2s^2 - 220rs - 110rt - 110st + 198rs^2\right.\\&& \left. + 198r^2s + 99r^2t + 99s^2t - 55r^2 - 55s^2 - 396rs^2t - 396r^2st + 462r^2s^2t + 396rst - 21)\right.,\\
            D^{[1]}_{133}&=&\frac{ -h^2r^5}{2520t^2(r - t)^2(s - t)^2(t - 1)^2}\left. (48r^2s^2 - 15r^3s^2 - 42rs^2 + 48r^2s - 60r^3s + 20r^4s + 24r^2t -\right.\\ \end{eqnarray*}
        \begin{eqnarray*}&& \left. 30r^3t + 10r^4t + 84s^2t - 15r^3 + 20r^4 - 7r^5 - 84rs^2t + 96r^2st - 30r^3st + 24r^2s^2t - 84rst)\right.,\\
            D^{[1]}_{143}&=&\frac{-h^2s^5}{2520t^2(r - t)^2(s - t)^2(t - 1)^2}\left.  (48r^2s^2 - 15r^2s^3 + 48rs^2 - 42r^2s - 60rs^3 + 20rs^4 + 84r^2t +\right.\\&& \left. 24s^2t - 30s^3t + 10s^4t - 15s^3 + 20s^4 - 7s^5 + 96rs^2t - 84r^2st - 30rs^3t + 24r^2s^2t - 84rst)\right.,\\
            D^{[1]}_{153}&=&\frac{-h^2t^2}{2520(r - t)^2(s - t)^2(t - 1)^2}\left.  (84r^2s^2t^2 - 252r^2s^2t + 210r^2s^2 - 120r^2st^3 + 336r^2st^2 - 252r^2\right.\\&& \left.st + 45r^2t^4 - 120r^2t^3 + 84r^2t^2 - 120rs^2t^3 + 336rs^2t^2 - 252rs^2t + 180rst^4 - 480rst^3 + 336\right.\\&& \left.rst^2 - 70rt^5 + 180rt^4 - 120rt^3 + 45s^2t^4 - 120s^2t^3 + 84s^2t^2 - 70st^5 + 180st^4 - 120st^3 + 28\right.\\&& \left.t^6 - 70t^5 + 45t^4)\right.,\\
            D^{[1]}_{163}&=&\frac{-h^2}{2520t^2(r - t)^2(s - t)^2(t - 1)^2}\left.   (20r + 20s + 10t - 42r^2s^2 - 60rs - 30rt - 30st + 48rs^2 + 48\right.\\&& \left.r^2s + 24r^2t + 24s^2t - 15r^2 - 15s^2 - 84rs^2t - 84r^2st + 84r^2s^2t + 96rst - 7)\right.,\\
            D^{[1]}_{14}&=&\frac{-h^5r^8}{2162160(r - 1)^2(s - 1)^2(t - 1)^2}\left. (- 35r^5 + 130r^4s + 130r^4t + 65r^4 - 130r^3s^2 - 520r^3st - 260\right.\\&& \left.r^3s - 130r^3t^2 - 260r^3t + 572r^2s^2t + 286r^2s^2 + 572r^2st^2 + 1144r^2st + 286r^2t^2 - 715rs^2t^2 - \right.\\&& \left.1430rs^2t - 1430rst^2 + 2145s^2t^2)\right.,\\
            D^{[1]}_{24}&=&\frac{-h^5s^8}{2162160(r - 1)^2(s - 1)^2(t - 1)^2}\left.(- 130r^2s^3 + 572r^2s^2t + 286r^2s^2 - 715r^2st^2 - 1430r^2st + \right.\\&& \left.2145r^2t^2 + 130rs^4 - 520rs^3t - 260rs^3 + 572rs^2t^2 + 1144rs^2t - 1430rst^2 - 35s^5 + 130s^4t +\right.\\&& \left. 65s^4 - 130s^3t^2 - 260s^3t + 286s^2t^2)\right.,\\
            D^{[1]}_{34}&=&\frac{-h^5t^8}{2162160(r - 1)^2(s - 1)^2(t - 1)^2}\left.  (- 715r^2s^2t + 2145r^2s^2 + 572r^2st^2 - 1430r^2st - 130r^2t^3 +\right.\\&& \left. 286r^2t^2 + 572rs^2t^2 - 1430rs^2t - 520rst^3 + 1144rst^2 + 130rt^4 - 260rt^3 - 130s^2t^3 + 286s^2t^2\right.\\&& \left. + 130st^4 - 260st^3 - 35t^5 + 65t^4)\right.,\\
            D^{[1]}_{44}&=&\frac{-h^5}{1081080(r - 1)^2(s - 1)^2(t - 1)^2}\left. (1716r^2s^2t^2 - 1287r^2s^2t + 286r^2s^2 - 1287r^2st^2 + 1144r^2s\right.\\&& \left.t - 286r^2s + 286r^2t^2 - 286r^2t + 78r^2 - 1287rs^2t^2 + 1144rs^2t - 286rs^2 + 1144rst^2 - 1144r\right.\\&& \left.st + 312rs - 286rt^2 + 312rt - 91r + 286s^2t^2 - 286s^2t + 78s^2 - 286st^2 + 312st - 91s + 78\right.\\&& \left.t^2 - 91t + 28)\right.,\\
            D^{[1]}_{54}&=&\frac{-h^4r^7}{55440(r - 1)^2(s - 1)^2(t - 1)^2}\left.  (- 7r^5 + 24r^4s + 24r^4t + 12r^4 - 22r^3s^2 - 88r^3st - 44r^3s - \right.\\&& \left.22r^3t^2 - 44r^3t + 88r^2s^2t + 44r^2s^2 + 88r^2st^2 + 176r^2st + 44r^2t^2 - 99rs^2t^2 - 198rs^2t - 198\right.\\&& \left.rst^2 + 264s^2t^2)\right.,\\
            D^{[1]}_{64}&=&\frac{-h^4s^7}{55440(r - 1)^2(s - 1)^2(t - 1)^2}\left.  (- 22r^2s^3 + 88r^2s^2t + 44r^2s^2 - 99r^2st^2 - 198r^2st + 264r^2t^2\right.\\&& \left. + 24rs^4 - 88rs^3t - 44rs^3 + 88rs^2t^2 + 176rs^2t - 198rst^2 - 7s^5 + 24s^4t + 12s^4 - 22s^3t^2 - 44\right.\\&& \left.s^3t + 44s^2t^2)\right.,\\
            D^{[1]}_{74}&=&\frac{-h^4t^7}{55440(r - 1)^2(s - 1)^2(t - 1)^2}\left.  (- 99r^2s^2t + 264r^2s^2 + 88r^2st^2 - 198r^2st - 22r^2t^3 + 44r^2t^2 +\right.\\&& \left. 88rs^2t^2 - 198rs^2t - 88rst^3 + 176rst^2 + 24rt^4 - 44rt^3 - 22s^2t^3 + 44s^2t^2 + 24st^4 - 44st^3 -\right.\\&& \left. 7t^5 + 12t^4)\right.,\\
            D^{[1]}_{84}&=&\frac{-h^4}{55440(r - 1)^2(s - 1)^2(t - 1)^2}\left.  (462r^2s^2t^2 - 396r^2s^2t + 99r^2s^2 - 396r^2st^2 + 396r^2st - 110r^2s\right.\\&& \left. + 99r^2t^2 - 110r^2t + 33r^2 - 396rs^2t^2 + 396rs^2t - 110rs^2 + 396rst^2 - 440rst + 132rs - 110rt^2\right.\\&& \left. + 132rt - 42r + 99s^2t^2 - 110s^2t + 33s^2 - 110st^2 + 132st - 42s + 33t^2 - 42t + 14)\right.,\\
            D^{[1]}_{94}&=&\frac{-h^3r^6}{27720(r - 1)^2(s - 1)^2(t - 1)^2}\left.(- 21r^5 + 66r^4s + 66r^4t + 33r^4 - 55r^3s^2 - 220r^3st - 110r^3s - \right.\\
        \end{eqnarray*}
        \begin{eqnarray*}
            && \left.55r^3t^2 - 110r^3t + 198r^2s^2t + 99r^2s^2 + 198r^2st^2 + 396r^2st + 99r^2t^2 - 198rs^2t^2 - 396rs^2t - \right.\\&& \left.396rst^2 + 462s^2t^2)\right.,\\  
            D^{[1]}_{104}&=&\frac{-h^3s^6}{27720(r - 1)^2(s - 1)^2(t - 1)^2}\left. (- 55r^2s^3 + 198r^2s^2t + 99r^2s^2 - 198r^2st^2 - 396r^2st + 462r^2t^2\right.\\&& \left. + 66rs^4 - 220rs^3t - 110rs^3 + 198rs^2t^2 + 396rs^2t - 396rst^2 - 21s^5 + 66s^4t + 33s^4 - 55s^3t^2 -\right.\\&& \left. 110s^3t + 99s^2t^2)\right.,\\
            D^{[1]}_{114}&=&\frac{-h^3t^6}{27720(r - 1)^2(s - 1)^2(t - 1)^2}\left. (- 198r^2s^2t + 462r^2s^2 + 198r^2st^2 - 396r^2st - 55r^2t^3 + 99r^2t^2\right.\\&& \left. + 198rs^2t^2 - 396rs^2t - 220rst^3 + 396rst^2 + 66rt^4 - 110rt^3 - 55s^2t^3 + 99s^2t^2 + 66st^4 - 110s\right.\\&& \left.t^3 - 21t^5 + 33t^4)\right.,\\
            D^{[1]}_{124}&=&\frac{-h^3}{13860(r - 1)^2(s - 1)^2(t - 1)^2}\left.  (462r^2s^2t^2 - 462r^2s^2t + 132r^2s^2 - 462r^2st^2 + 528r^2st - 165r^2\right.\\&& \left.s + 132r^2t^2 - 165r^2t + 55r^2 - 462rs^2t^2 + 528rs^2t - 165rs^2 + 528rst^2 - 660rst + 220rs - 165\right.\\&& \left.rt^2 + 220rt - 77r + 132s^2t^2 - 165s^2t + 55s^2 - 165st^2 + 220st - 77s + 55t^2 - 77t + 28)\right.,\\
            D^{[1]}_{134}&=&\frac{-h^2r^5}{2520(r - 1)^2(s - 1)^2(t - 1)^2}\left. (- 7r^5 + 20r^4s + 20r^4t + 10r^4 - 15r^3s^2 - 60r^3st - 30r^3s - 15r^3t^2\right.\\&& \left. - 30r^3t + 48r^2s^2t + 24r^2s^2 + 48r^2st^2 + 96r^2st + 24r^2t^2 - 42rs^2t^2 - 84rs^2t - 84rst^2 + 84s^2t^2)\right.,\\
            D^{[1]}_{144}&=&\frac{-h^2s^5}{2520(r - 1)^2(s - 1)^2(t - 1)^2}\left. (- 15r^2s^3 + 48r^2s^2t + 24r^2s^2 - 42r^2st^2 - 84r^2st + 84r^2t^2 + 20rs^4\right.\\&& \left. - 60rs^3t - 30rs^3 + 48rs^2t^2 + 96rs^2t - 84rst^2 - 7s^5 + 20s^4t + 10s^4 - 15s^3t^2 - 30s^3t + 24s^2t^2)\right.,\\
            D^{[1]}_{154}&=&\frac{-h^2t^5}{2520(r - 1)^2(s - 1)^2(t - 1)^2}\left.  (- 42r^2s^2t + 84r^2s^2 + 48r^2st^2 - 84r^2st - 15r^2t^3 + 24r^2t^2 + 48rs^2\right.\\&& \left.t^2 - 84rs^2t - 60rst^3 + 96rst^2 + 20rt^4 - 30rt^3 - 15s^2t^3 + 24s^2t^2 + 20st^4 - 30st^3 - 7t^5 + 10t^4)\right.,\\
            D^{[1]}_{164}&=&\frac{ -h^2}{2520(r - 1)^2(s - 1)^2(t - 1)^2}\left. (210r^2s^2t^2 - 252r^2s^2t + 84r^2s^2 - 252r^2st^2 + 336r^2st - 120r^2s +\right.\\&& \left. 84r^2t^2 - 120r^2t + 45r^2 - 252rs^2t^2 + 336rs^2t - 120rs^2 + 336rst^2 - 480rst + 180rs - 120rt^2 +\right.\\&& \left. 180rt - 70r + 84s^2t^2 - 120s^2t + 45s^2 - 120st^2 + 180st - 70s + 45t^2 - 70t + 28)\right.\\
        \end{eqnarray*}
    \end{small}
\end{document}
